# Supplementary material
Source: MDPI journal article supplement (https://www.mdpi.com/2076-3263/12/1/20)
Supplement: s1 [file s1]

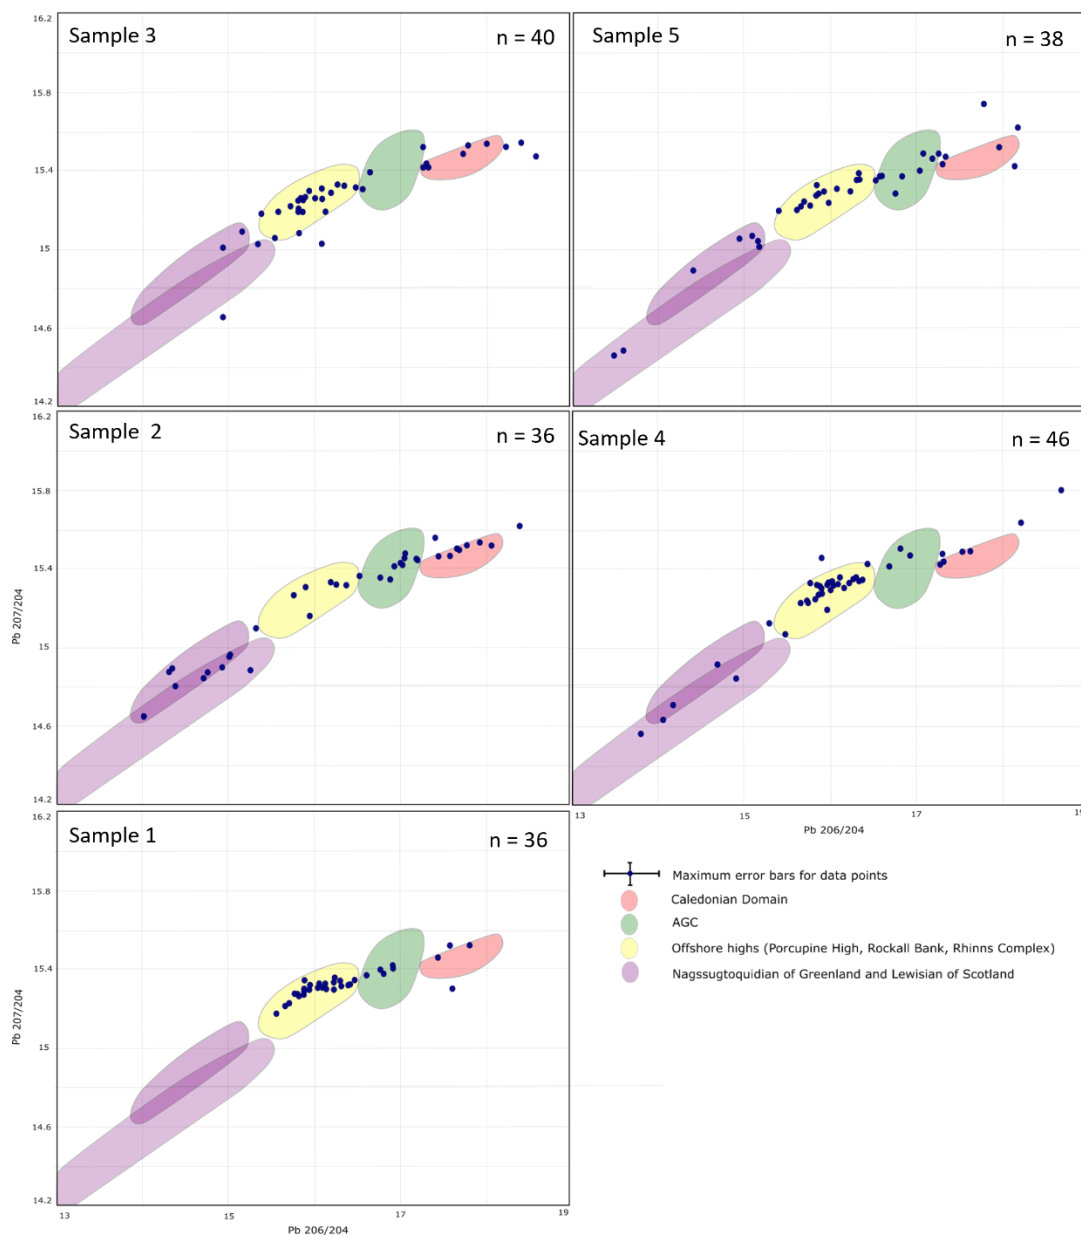

**Figure S1.**  $206Pb/204Pb$  versus  $207Pb/204Pb$  Pb-in-K-feldspar isotopic ratios for K-feldspars from individual channels as indicated in left corner. Key above.

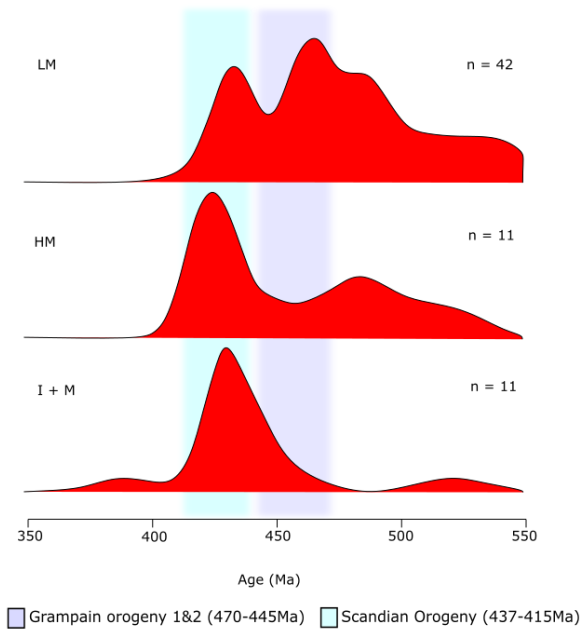

**Figure S2.** KDE's of basement terrane lithology from trace elements in apatite plotted against age. Only Caledonian (350-550 Ma) were plotted with a bandwidth of 8 Ma. All samples from 5 channel units are plotted together. LM = low grade metamorphic; HM = high grade metamorphic; I + M = I type granitoids and mafic igneous.
