# Supplementary material
Source: MDPI journal article supplement (https://www.mdpi.com/2076-3263/12/1/20)
Supplement: s1 [file s1]

Archive with 2 entries (2 files):
- geosciences-1494897 SP.pdf
- geosciences-1494897-supplementary (2).xlsx
