# Supplementary material
Source: MDPI journal article supplement (https://www.mdpi.com/2076-3263/12/1/20)
Supplement: s1 [file s1 › geosciences-1494897-supplementary (2).xlsx]

## Sheet: Pb-in-K-feldspar
Table 1. Pb-in-K-feldpsar isotopic data, Mullaghmore Sandstone fm.
Sample 1	Location: Bunatrahir West		Grid Coordinates: 54°18'31.6''N, -9°23'35.6''W
File name	206Pb/204Pb	2σ	207Pb/204Pb	2σ	208Pb/204Pb	2σ
ap01_a02	16.9412	0.0608687	15.4056	0.0283251	35.9518	0.0918999
ap01_a04	16.432	0.0592443	15.3233	0.00864102	35.5016	0.0324354
ap01_a06	15.8913	0.0349772	15.2983	0.022166	35.2408	0.0551064
ap01_a07	16.2453	0.0300907	15.2951	0.0167625	35.629	0.0451181
ap01_a010	16.3152	0.034684	15.3378	0.0232613	35.5682	0.0574556
ap01_a011	15.8988	0.0117908	15.2844	0.0104188	35.2686	0.0244054
ap01_a015	17.6166	0.0666477	15.3035	0.0426553	35.9685	0.103755
ap01_a018	15.728	0.0161529	15.2297	0.0106712	35.0904	0.0268292
ap01_a019	15.8437	0.0209176	15.2647	0.010126	35.2086	0.0281503
ap01_a020	15.839	0.0115232	15.271	0.0108024	35.2565	0.0252444
ap01_a022	17.8213	0.0286111	15.5256	0.023195	36.055	0.0544342
ap01_a023	16.0667	0.0197813	15.3161	0.0105267	35.5092	0.029211
ap01_a026	15.9008	0.00666923	15.2727	0.0056162	35.3135	0.016315
ap01_a027	15.9131	0.0337946	15.3448	0.0255763	35.3633	0.0620693
ap01_a028	16.7952	0.0492054	15.3953	0.0344795	35.5347	0.0762912
ap01_a030	16.414	0.0369462	15.3191	0.013618	35.5997	0.035661
ap01_a031	16.1441	0.0180575	15.3007	0.00715978	35.5137	0.0280924
ap01_a034	15.9641	0.01315	15.3155	0.0112528	35.3386	0.0268151
ap01_a035	16.0558	0.0313692	15.3099	0.0160082	35.7293	0.0785136
ap01_a036	17.6	0.0293562	15.5279	0.0199013	35.6266	0.0479066
ap01_a038	16.8246	0.0349807	15.3746	0.0140188	35.7684	0.0465714
ap01_a039	16.9314	0.0367945	15.4187	0.0188144	35.5238	0.0424769
ap01_a042	16.1431	0.0281995	15.3222	0.00970196	35.5775	0.0409967
ap01_a043	15.5744	0.0128104	15.175	0.0126733	35.0847	0.0288098
ap01_a044	16.2365	0.0177916	15.3345	0.0103222	35.6372	0.0281375
ap01_a046	16.3279	0.0623071	15.3133	0.037004	35.621	0.0990185
ap01_a051	15.6753	0.0370152	15.2111	0.0253119	35.1168	0.066548
ap01_a052	15.9627	0.0106867	15.2971	0.00726193	35.3533	0.0180513
ap01_a054	17.4617	0.0458676	15.4584	0.00983691	36.4312	0.0510835
ap01_a055	16.0835	0.0181716	15.3091	0.0143638	35.4921	0.0347004
ap01_a058	16.2482	0.0259904	15.3587	0.0168602	35.597	0.0412132
ap01_a059	16.1282	0.0207093	15.3204	0.0124116	35.4812	0.0367461
ap01_a060	15.7998	0.00861263	15.2773	0.00678313	35.212	0.0161542
ap01_a063	16.488	0.0525523	15.3449	0.0181682	36.0307	0.0711451
ap01_a066	16.6265	0.0457534	15.3658	0.0118869	36.0184	0.0851634
ap01_a067	16.0723	0.0208422	15.3264	0.00724825	35.4767	0.0249249
Sample 2	Location: Bunatrahir West		Grid Coordinates: 54°18'31.6''N, -9°23'35.6''W
File name	206Pb/204Pb	2σ	207Pb/204Pb	2σ	208Pb/204Pb	2σ
ap04_a02	14.4056	0.0434645	14.8002	0.0298552	34.2573	0.078318
ap04_a03	17.0407	0.00964256	15.4181	0.00844397	36.4268	0.0199381
ap04_a04	17.0219	0.0054398	15.424	0.00507067	36.4278	0.0120033
ap04_a07	17.4292	0.0805891	15.5534	0.073089	37.3893	0.174331
ap04_a015	17.7142	0.00956104	15.4943	0.00758015	37.1117	0.018239
ap04_a016	17.2067	0.00515589	15.4448	0.00477322	36.6344	0.0110909
ap04_a018	14.3263	0.0286978	14.8722	0.0270577	34.3248	0.063871
ap04_a019	14.0259	0.00920708	14.647	0.00975895	33.6819	0.0222447
ap04_a023	17.5983	0.0247412	15.4595	0.0220244	36.8584	0.0527506
ap04_a024	17.6011	0.0246577	15.4623	0.0219222	36.8663	0.0523958
ap04_a026	15.0389	0.0235164	14.959	0.0213223	34.9628	0.0511621
ap04_a027	15.335	0.0390602	15.0927	0.0170703	35.1904	0.0552876
ap04_a028	17.4725	0.025433	15.4594	0.0203296	36.8326	0.0483347
ap04_a030	17.7977	0.0224488	15.5155	0.0155138	37.3626	0.0383531
ap04_a034	14.7709	0.016283	14.8689	0.0120209	33.8874	0.0265816
ap04_a035	14.9434	0.0226024	14.8958	0.0202144	35.5265	0.077266
ap04_a036	17.0704	0.0179764	15.4493	0.0172196	36.5115	0.0386933
ap04_a038	16.7881	0.014064	15.3501	0.00794779	36.123	0.0212896
ap04_a039	16.9509	0.0292919	15.4079	0.0234177	36.6022	0.0581443
ap04_a040	15.9606	0.0566404	15.1574	0.0432166	35.4932	0.105962
ap04_a042	17.9433	0.0475056	15.5301	0.0273298	37.4158	0.0724873
ap04_a043	15.782	0.0357697	15.261	0.0194161	35.1935	0.049921
ap04_a046	15.9156	0.0107926	15.3025	0.00924914	35.3465	0.0216509
ap04_a048	14.7261	0.00799486	14.8396	0.00740545	34.8109	0.017542
ap04_a050	18.4115	0.00774916	15.6141	0.00543916	37.8096	0.0132304
ap04_a051	16.2724	0.0214148	15.3169	0.0133141	35.2876	0.0315223
ap04_a052	17.6754	0.0217748	15.4971	0.0173403	36.9856	0.0421486
ap04_a054	16.2123	0.0279372	15.3281	0.0196287	35.6311	0.0477234
ap04_a055	14.3615	0.015896	14.8902	0.0125209	34.4745	0.0294894
ap04_a058	15.0249	0.0143378	14.949	0.0143492	35.2947	0.0341286
ap04_a059	17.2187	0.0125478	15.4416	0.00523124	36.6862	0.0155662
ap04_a060	15.275	0.278351	14.8807	0.060115	34.9335	0.291515
ap04_a062	18.0857	0.00332186	15.5135	0.00312605	37.7078	0.00662091
ap04_a063	16.3901	0.0272133	15.313	0.0156947	35.6365	0.0454414
ap04_a064	16.8994	0.0385051	15.3433	0.0218369	36.1984	0.0599911
ap04_a071	17.0711	0.0438133	15.4734	0.039352	36.6115	0.094209
Sample 3	Location: Bunatrahir West		Grid Coordinates: 54°18'31.6''N, -9°23'35.6''W
File name	206Pb/204Pb	2σ	207Pb/204Pb	2σ	208Pb/204Pb	2σ
ap03_a02	16.0816	0.0372595	15.0352	0.00969568	34.837	0.039702
ap03_a04	15.8117	0.0232947	15.088	0.0174947	34.8159	0.0469077
ap03_a06	16.1232	0.045918	15.199	0.0136351	35.2021	0.0547232
ap03_a07	18.5902	0.0717519	15.4808	0.034628	40.2797	0.254264
ap03_a010	16.0835	0.0166499	15.2645	0.00731929	35.3	0.0252007
ap03_a011	16.1847	0.0158992	15.2937	0.01422	35.1754	0.0334709
ap03_a012	15.8103	0.0136517	15.2114	0.0106549	35.1051	0.0257749
ap03_a014	15.7987	0.0358103	15.199	0.0201475	35.1386	0.0458314
ap03_a015	15.8953	0.0222724	15.2681	0.0108271	35.5426	0.0514707
ap03_a016	14.9249	0.0383898	15.014	0.0526735	35.5033	0.0931913
ap03_a018	17.2654	0.016968	15.4218	0.00793817	36.483	0.0225994
ap03_a019	16.2656	0.0220698	15.3364	0.012887	35.3637	0.0339586
ap03_a023	15.8592	0.046651	15.1942	0.0380497	35.1942	0.0891684
ap03_a024	17.7914	0.0165419	15.5348	0.0132989	37.4259	0.0305222
ap03_a028	15.9322	0.0256179	15.2999	0.0143176	35.3225	0.0384681
ap03_a031	16.4784	0.0790943	15.3219	0.0183974	35.8983	0.0766632
ap03_a035	16.0873	0.011332	15.3175	0.00798638	35.2234	0.0186289
ap03_a036	17.3392	0.0296343	15.4217	0.02315	36.5599	0.057682
ap03_a038	19.2176	0.0122293	15.5353	0.0023205	30.019	0.107789
ap03_a039	16.6481	0.0229762	15.397	0.0143939	35.8592	0.0380224
ap03_a040	18.2355	0.0057924	15.5295	0.0038874	37.6548	0.00962893
ap03_a043	15.8695	0.0844689	15.2604	0.0273348	35.5367	0.0786137
ap03_a047	16.0039	0.0221875	15.2685	0.0116848	35.0144	0.0285407
ap03_a048	16.5648	0.0605424	15.3144	0.0165516	35.713	0.0611924
ap03_a050	17.7295	0.0170173	15.4915	0.0105895	36.8396	0.025905
ap03_a051	15.8283	0.0164863	15.2498	0.0140235	35.093	0.0334447
ap03_a052	16.3446	0.0220563	15.3316	0.017152	35.3856	0.0393141
ap03_a054	15.5787	0.00870553	15.1962	0.0077162	35.0482	0.017856
ap03_a055	17.2683	0.0367152	15.5248	0.023468	35.6815	0.0560738
ap03_a058	15.5344	0.0938515	15.0633	0.020407	35.5626	0.130175
ap03_a059	15.7162	0.0296341	15.227	0.0245093	35.1222	0.0589887
ap03_a060	15.3415	0.0651824	15.0358	0.052314	34.7254	0.125821
ap03_a062	15.1577	0.0821225	15.0978	0.0644229	34.9149	0.154351
ap03_a063	15.3695	0.0300401	15.1885	0.0138829	34.8578	0.0389036
ap03_a064	15.8484	0.0529753	15.2635	0.036262	35.43	0.0874779
ap03_a066	17.3023	0.0476683	15.4418	0.0133444	36.3788	0.0544796
ap03_a067	18.0008	0.019145	15.5459	0.0152998	37.2729	0.0387537
ap03_a068	18.4108	0.0392865	15.5514	0.0267446	37.9917	0.0662418
Sample 4	Location: Bunatrahir West		Grid Coordinates: 54°18'31.6''N, -9°23'35.6''W
File name	206Pb/204Pb	2σ	207Pb/204Pb	2σ	208Pb/204Pb	2σ
ap04_b02	15.9651	0.0293753	15.3207	0.0278751	35.3519	0.0646603
ap04_b03	16.8235	0.0181133	15.5036	0.0151665	34.0335	0.0349936
ap04_b04	16.3047	0.0141444	15.3549	0.00884911	35.2525	0.0206584
ap04_b06	16.4418	0.0287438	15.4243	0.0169048	35.5093	0.0388005
ap04_b07	16.3384	0.0355025	15.3443	0.0156925	35.7535	0.0485155
ap04_b010	16.1135	0.0347705	15.3566	0.0246368	35.6772	0.0706748
ap04_b011	16.3803	0.0383043	15.347	0.0169342	35.4517	0.0404824
ap04_b012	15.904	0.0328178	15.456	0.0326798	35.707	0.0738185
ap04_b014	16.0278	0.0326758	15.3333	0.0263903	35.4603	0.0642633
ap04_b015	17.541	0.00758392	15.493	0.00669662	36.7443	0.0163184
ap04_b016	15.7409	0.0290136	15.2352	0.0134726	35.1807	0.0362093
ap04_b018	15.8824	0.00909659	15.2735	0.00596487	35.2597	0.0163614
ap04_b019	13.7911	0.0207746	14.5656	0.0174894	34.1754	0.0424579
ap04_b023	15.9858	0.0363032	15.3233	0.0350425	35.3768	0.0825094
ap04_b024	14.1701	0.0222739	14.7104	0.0119459	33.2211	0.0333147
ap04_b026	16.6931	0.0321396	15.4134	0.00973976	35.257	0.0202827
ap04_b027	17.652	0.00902424	15.4878	0.00691796	36.9761	0.0175361
ap04_b028	15.2905	0.0401317	15.1243	0.0340605	34.8806	0.0735501
ap04_b030	17.2906	0.0449567	15.4284	0.0314244	36.8665	0.0826268
ap04_b032	18.23	0.00546785	15.6317	0.00735515	38.1477	0.0128591
ap04_b034	15.9638	0.042853	15.1947	0.0298858	35.3904	0.0762091
ap04_b035	16.044	0.0275717	15.3191	0.0214697	35.4312	0.0525844
ap04_b038	18.6988	0.0235687	15.7969	0.0198938	35.6572	0.0455131
ap04_b039	16.0522	0.0288054	15.318	0.0216747	35.5451	0.0543453
ap04_b040	17.3134	0.0868741	15.4773	0.0249623	35.493	0.0516337
ap04_b042	14.6836	0.0207016	14.9166	0.0100231	34.5429	0.0268806
ap04_b043	16.2285	0.0156068	15.3289	0.0138386	35.7878	0.0321559
ap04_b046	15.8328	0.0227333	15.2453	0.0148356	35.3642	0.0437486
ap04_b047	15.9083	0.0334689	15.2761	0.0283781	35.4709	0.0661909
ap04_b048	16.9341	0.0422667	15.4666	0.032188	36.5459	0.0910478
ap04_b051	16.1649	0.0752243	15.3036	0.0391391	36.0335	0.230758
ap04_b052	16.0527	0.0148065	15.318	0.0121813	35.3388	0.0286774
ap04_b054	15.8539	0.0125249	15.3173	0.0119642	35.2885	0.0278372
ap04_b056	18.2311	0.00428109	15.6338	0.00377173	38.1592	0.00905118
ap04_b058	14.0581	0.00765322	14.6385	0.0079554	34.847	0.0190712
ap04_b059	16.2844	0.00809988	15.354	0.00631718	35.3185	0.0148969
ap04_b060	15.6577	0.0196168	15.2247	0.0179783	35.1353	0.0407377
ap04_b062	14.9073	0.0436213	14.8463	0.0225669	34.8576	0.0583817
ap04_b064	15.9055	0.00800856	15.3042	0.00778438	35.3315	0.0177872
ap04_b066	15.4803	0.0547147	15.0684	0.0505261	35.0546	0.119364
ap04_b067	16.0075	0.0192978	15.298	0.0125523	35.1612	0.0279564
ap04_b02	17.3107	0.102397	15.4362	0.0574525	35.1623	0.154261
ap04_b03	16.0948	0.0176163	15.3232	0.0147219	35.3298	0.0325313
ap04_b04	15.7472	0.0306267	15.232	0.0255961	35.1838	0.0571146
Sample 5	Location: Bunatrahir West		Grid Coordinates: 54°18'31.6''N, -9°23'35.6''W
File name	206Pb/204Pb	2σ	207Pb/204Pb	2σ	208Pb/204Pb	2σ
ap03_b02	16.5856	0.0172657	15.3745	0.012077	35.7436	0.0308698
ap03_b03	15.1039	0.0214724	15.0727	0.00901474	34.805	0.0259753
ap03_b04	15.1822	0.0112952	15.0185	0.00926043	33.9594	0.0211489
ap03_b06	16.3488	0.0306508	15.3594	0.011426	35.5737	0.03117
ap03_b07	16.8424	0.0554801	15.3725	0.0314774	35.9762	0.0884972
ap03_b010	17.316	0.0339151	15.4352	0.0312434	36.7234	0.0734676
ap03_b011	15.8696	0.0206845	15.2803	0.0103911	35.2726	0.0290033
ap03_b012	13.6097	0.0263078	14.4934	0.0115005	33.3644	0.0326069
ap03_b014	15.9363	0.00936904	15.295	0.00609356	35.4567	0.0180613
ap03_b015	17.0956	0.0329644	15.4899	0.00946151	35.7453	0.135045
ap03_b016	15.8551	0.00998405	15.2751	0.0049416	35.2853	0.0148004
ap03_b018	15.8503	0.0715554	15.3301	0.0465835	35.62	0.118454
ap03_b019	16.0882	0.00890997	15.3137	0.00655303	35.468	0.0163508
ap03_b023	17.2708	0.0808519	15.4843	0.0534362	36.3354	0.137076
ap03_b024	14.9529	0.00659043	15.0553	0.00439447	34.6811	0.0101912
ap03_b026	16.5374	0.0483712	15.3556	0.0315626	35.7159	0.0805082
ap03_b027	17.9675	0.0085491	15.5195	0.00761012	37.3402	0.0181005
ap03_b028	17.7887	0.0507245	15.7395	0.0156708	34.2354	0.104155
ap03_b031	15.3964	0.0546602	15.2027	0.0390682	34.8225	0.098853
ap03_b034	16.3224	0.028706	15.356	0.0138607	35.6609	0.0364636
ap03_b038	17.0514	0.00705722	15.399	0.00651642	36.3311	0.0151189
ap03_b039	17.3447	0.0154976	15.4755	0.0134636	36.5964	0.0322328
ap03_b040	15.6646	0.0111017	15.2187	0.00971634	35.0204	0.022967
ap03_b042	18.1559	0.0860532	15.4255	0.0694578	37.7071	0.171381
ap03_b044	16.2429	0.0519984	15.2991	0.0452182	35.539	0.105979
ap03_b046	15.7036	0.0257793	15.2448	0.0213986	35.1185	0.0534096
ap03_b047	16.6037	0.0170183	15.3739	0.0123941	35.3514	0.0313556
ap03_b048	18.1875	0.00635181	15.6206	0.00379562	38.1221	0.00949856
ap03_b050	15.6177	0.00759717	15.2035	0.00467167	35.0594	0.0110096
ap03_b051	17.1977	0.0243681	15.463	0.00991831	36.6053	0.0283809
ap03_b052	16.3421	0.011247	15.3849	0.00944	35.9273	0.0220786
ap03_b054	15.9905	0.0224112	15.2411	0.0157669	35.1907	0.0382595
ap03_b055	15.7763	0.014791	15.2276	0.0112046	35.1096	0.0267426
ap03_b059	13.4969	0.0145829	14.463	0.0156665	34.7901	0.0377831
ap03_b062	14.4217	0.0187528	14.8937	0.0161677	34.5792	0.0400251
ap03_b063	15.1737	0.0246778	15.0461	0.0175274	34.8774	0.0429345
ap03_b064	16.7689	0.00481724	15.2846	0.00448065	36.2876	0.0103905
Reference materials: Shap feldspar
File name	206Pb/204Pb	2σ	207Pb/204Pb	2σ	208Pb/204Pb	2σ
ap01_a08	18.2163	0.00406338	15.6187	0.00342775	38.123	0.00843904
ap01_a024	18.2043	0.00420994	15.605	0.00402309	38.0985	0.00902173
ap01_a032	18.2253	0.0111913	15.6003	0.0135086	38.1193	0.0242499
ap01_a040	18.2268	0.00368145	15.6035	0.00561321	38.1226	0.00944455
ap01_a048	18.2157	0.00625492	15.6216	0.00591393	38.1298	0.0120594
ap01_a064	18.2453	0.00467962	15.6378	0.00384369	38.1848	0.00827545
ap03_a08	18.2386	0.00447629	15.5371	0.00380559	37.889	0.00914468
ap03_a020	18.2292	0.00346272	15.6041	0.00342231	38.0755	0.00725948
ap03_a032	18.2142	0.00387634	15.6062	0.0033618	38.0777	0.00825181
ap03_a044	18.2187	0.0043018	15.6124	0.00377689	38.1012	0.00906483
ap03_a056	18.216	0.00426056	15.6132	0.00378604	38.103	0.00922057
ap04_b08	18.207	0.00726151	15.6186	0.00687797	38.0997	0.015536
ap04_b020	18.2187	0.00721557	15.6207	0.00685144	38.1197	0.015135
ap04_b032	18.23	0.00546785	15.6317	0.00735515	38.1477	0.0128591
ap04_b044	18.2381	0.00529095	15.6361	0.00544846	38.1707	0.0114909
ap04_b056	18.2311	0.00428109	15.6338	0.00377173	38.1592	0.00905118
ap04_b068	18.2341	0.00483056	15.6343	0.00470553	38.1576	0.0102772
ap03_b020	18.2268	0.00345134	15.6273	0.00311917	38.1354	0.00714824
ap03_b048	18.1875	0.00635181	15.6206	0.00379562	38.1221	0.00949856
ap03_b060	18.2196	0.0047167	15.6207	0.00413692	38.1289	0.0101258
ap01_a08	18.2163	0.00406338	15.6187	0.00342775	38.123	0.00843904
ap01_a016	18.2109	0.00457015	15.6155	0.00530276	38.1189	0.0101568
ap01_a032	18.2253	0.0111913	15.6003	0.0135086	38.1193	0.0242499
ap01_a048	18.2157	0.00625492	15.6216	0.00591393	38.1298	0.0120594
ap01_a056	18.231	0.00425801	15.6253	0.00328661	38.15	0.00819535

## Sheet: U-Pb apatite
Table 2. Apatite U-Pb geochronology Mullaghmore Sandstone fm
Sample 1		Location: Bunatrahir West			Grid Coordinates: 54°18'31.6''N, -9°23'35.6''W
Apatite	207U/235Pb	2σ	206U/238Pb	2σ	ρ	238U/206Pb	2σ	207Pb/206Pb	2σ	ρ	206Pb/238U (Ma)	2σ (Ma)	207Pb/235U (Ma)	2σ (Ma)	207Pb/206Pb (Ma)	2σ (Ma)	207Pb corrected Age (Ma)	2σ (Ma)		% age error	U (ppm)	% error
BTW02_1	11.24	0.74	0.2748	0.015	0.73322	3.63901	0.198636	0.2982	0.0083	-0.25745	1565.12	85.4323	2543.24	167.437	3460.9	96.3295	1196.03	64.8486	0.0836098	5.42198	1.2	5.42198
BTW02_2	5.42	0.31	0.3118	0.017	0.67801	3.20718	0.174863	0.1259	0.0026	-0.0080061	1749.56	95.3896	1888.02	107.986	2041.49	42.1594	1712.38	91.1215	0.0583984	5.32135	4.2	5.32135
BTW02_3	5.42	0.33	0.1108	0.0061	0.71761	9.02527	0.496879	0.3518	0.0059	-0.25311	677.392	37.2933	1888.02	114.953	3714.81	62.3007	437.77	24.2626	0.228431	5.54233	2.9	5.54233
BTW02_4	5.25	0.33	0.2676	0.015	0.67877	3.73692	0.209469	0.1422	0.0038	-0.090146	1528.61	85.6843	1860.77	116.963	2254.17	60.238	1446.79	78.5842	0.0691185	5.43162	1.9	5.43162
BTW02_5	18.38	1.1	0.3939	0.022	0.63607	2.53872	0.141792	0.3364	0.0082	0.091565	2140.89	119.572	3009.84	180.132	3646.5	88.886	1622.25	90.5498	0.0616428	5.58174	0.5	5.58174
BTW02_6	6.86	0.39	0.3123	0.018	0.52748	3.20205	0.184556	0.1578	0.003	0.2872	1752.01	100.981	2093.5	119.018	2432.22	46.24	1651.45	92.6905	0.0605529	5.61268	2.6	5.61268
BTW02_7	19.65	1.2	0.3306	0.018	0.55032	3.0248	0.16469	0.4226	0.0093	0.13826	1841.29	100.252	3074.29	187.743	3991.5	87.8395	1151.55	64.3779	0.0868397	5.59056	0.53	5.59056
BTW02_8	5.01	0.29	0.2932	0.016	0.6815	3.41064	0.18612	0.1236	0.0021	-0.03164	1657.5	90.4502	1821.01	105.408	2008.83	34.1306	1616.8	85.7041	0.0618504	5.30083	4.6	5.30083
BTW02_9	5.35	0.29	0.3114	0.016	0.43105	3.2113	0.165	0.1248	0.0018	0.39989	1747.59	89.7928	1876.89	101.738	2025.96	29.2206	1712.4	85.8103	0.0583976	5.01112	1.4	5.01112
BTW02_10	6.66	0.4	0.3352	0.019	0.29431	2.98329	0.169101	0.1446	0.0045	0.45234	1863.54	105.63	2067.33	124.164	2283.02	71.0485	1798.93	100.293	0.0555886	5.57515	0.65	5.57515
BTW02_11	17.6	1.3	0.414	0.024	0.92341	2.41546	0.140027	0.3049	0.0086	-0.65413	2233.18	129.46	2968.13	219.237	3495.3	98.5882	1796.29	104.523	0.0556704	5.81881	0.25	5.81881
BTW02_12	12.38	1.2	0.34	0.021	0.73809	2.94118	0.181661	0.267	0.014	-0.47672	1886.67	116.53	2633.66	255.282	3288.49	172.43	1554.26	97.9087	0.0643393	6.29937	0.49	6.29937
BTW02_13	6.99	0.42	0.3162	0.017	0.48052	3.16256	0.17003	0.1599	0.0041	-0.057918	1771.14	95.2228	2110.16	126.791	2454.6	62.9385	1667.48	87.5698	0.0599706	5.25162	1.2	5.25162
BTW02_14	25.19	1.6	0.439	0.026	0.70462	2.2779	0.13491	0.418	0.013	-0.098438	2346.16	138.953	3315.61	210.598	3975.12	123.628	1569.3	97.6678	0.0637226	6.22365	0.2	6.22365
BTW02_15	49.6	3.2	0.625	0.038	0.76763	1.6	0.09728	0.572	0.016	-0.074521	3129.78	190.291	3984.31	257.053	4438.43	124.152	1604.81	116.031	0.0623127	7.23019	0.043	7.23019
BTW02_16	13	0.78	0.3521	0.019	0.72309	2.8401	0.153257	0.2656	0.0055	-0.18451	1944.62	104.935	2679.65	160.779	3280.23	67.9265	1613.46	85.4698	0.0619784	5.29728	1.9	5.29728
BTW02_17	118	16	1.23	0.14	0.97788	0.813008	0.0925375	0.681	0.02	-0.55657	5170.03	588.459	4852.64	657.985	4691.14	137.772	2926.17	452.303	0.0341744	15.4572	0.024	15.4572
BTW02_18	5.21	0.29	0.2753	0.015	0.038614	3.6324	0.197915	0.1378	0.003	0.53831	1567.65	85.4149	1854.25	103.212	2199.74	47.8898	1495.26	78.9337	0.0668781	5.27894	1	5.27894
BTW02_19	5.818	0.31	0.2344	0.013	0.29144	4.26621	0.236607	0.1786	0.0035	0.55946	1357.52	75.289	1949.09	103.853	2639.91	51.734	1214.34	65.1174	0.0823492	5.36237	1.3	5.36237
BTW02_20	6.2	0.41	0.2853	0.016	0.52176	3.50508	0.19657	0.1545	0.0053	-0.15378	1618	90.7395	2004.45	132.552	2396.34	82.2045	1517.32	82.8805	0.0659057	5.46229	1.5	5.46229
BTW02_21	10.01	0.55	0.3341	0.018	0.53285	2.99312	0.161257	0.2176	0.0041	0.30439	1858.22	100.114	2435.7	133.83	2963.02	55.8289	1636.22	86.091	0.0611164	5.26158	1.4	5.26158
BTW02_22	4.901	0.27	0.2816	0.015	0.48068	3.55114	0.189159	0.1263	0.0025	0.31957	1599.42	85.1961	1802.43	99.2972	2047.1	40.5205	1549.55	80.0349	0.0645349	5.16504	2.1	5.16504
BTW02_23	43.64	2.5	0.67	0.036	0.52959	1.49254	0.080196	0.4723	0.0096	0.25159	3305.87	177.629	3857.06	220.959	4157	84.4954	2266.95	132.313	0.0441121	5.83661	0.12	5.83661
BTW02_24	15.48	1	0.3746	0.021	0.68163	2.66951	0.149652	0.2968	0.0092	-0.29518	2051.01	114.979	2845.25	183.802	3453.6	107.052	1640.47	92.1136	0.0609582	5.61508	1.1	5.61508
BTW02_25	15.64	0.88	0.4095	0.023	0.55049	2.442	0.137158	0.2789	0.0071	0.25452	2212.64	124.275	2855.06	160.643	3356.78	85.4542	1846.56	103.59	0.0541548	5.6099	0.37	5.6099
BTW02_26	18.92	1.1	0.431	0.023	0.69557	2.32019	0.123815	0.3193	0.0066	-0.16887	2310.22	123.283	3037.75	176.613	3566.47	73.7196	1831.86	97.7644	0.0545894	5.33689	0.42	5.33689
BTW02_27	22.8	1.6	0.423	0.024	0.78761	2.36407	0.134131	0.388	0.011	-0.37296	2274.08	129.026	3218.45	225.856	3863.22	109.524	1597.52	93.1719	0.0625971	5.83229	0.32	5.83229
BTW02_28	5.33	0.34	0.2805	0.015	0.60588	3.56506	0.190645	0.1371	0.0038	-0.082143	1593.88	85.2342	1873.69	119.522	2190.89	60.7249	1524.07	79.1412	0.0656138	5.19276	4.4	5.19276
BTW02_29	5.63	0.34	0.2952	0.016	0.55353	3.38753	0.183606	0.1377	0.0035	-0.065071	1667.46	90.3774	1920.7	115.993	2198.48	55.88	1600.88	84.4064	0.0624658	5.27251	1.1	5.27251
BTW02_30	11.13	0.67	0.359	0.02	0.6331	2.78552	0.155182	0.229	0.0059	-0.0060172	1977.43	110.163	2534.07	152.545	3045.07	78.4538	1731.82	95.1027	0.0577428	5.4915	0.47	5.4915
BTW02_31	37.9	4	0.685	0.056	0.9647	1.45985	0.119346	0.394	0.014	-0.63162	3363.52	274.974	3717.31	392.328	3886.34	138.093	2729.75	262.772	0.0366334	9.62624	0.32	9.62624
BTW02_32	6.17	0.44	0.3176	0.017	0.83064	3.14861	0.168534	0.1413	0.005	-0.68206	1778	95.1699	2000.21	142.64	2243.2	79.3772	1712.52	89.8884	0.0583934	5.24889	1.5	5.24889
BTW02_33	5.942	0.32	0.2981	0.016	0.24515	3.35458	0.180051	0.1447	0.0025	0.46074	1681.88	90.272	1967.4	105.952	2284.21	39.4647	1602.84	83.5753	0.0623892	5.2142	2.8	5.2142
BTW02_34	9.33	0.61	0.3473	0.02	0.55083	2.87936	0.165814	0.1935	0.0067	0.1369	1921.69	110.665	2370.97	155.015	2772.14	95.9863	1755.03	99.8095	0.0569791	5.68706	1.9
BTW02_35	4.108	0.23	0.2591	0.014	0.40867	3.85951	0.208542	0.1143	0.0027	0.26627	1485.24	80.252	1655.89	92.7108	1868.88	44.1467	1449.27	75.7487	0.0690004	5.22669	1.2	5.22669
BTW02_36	7	0.43	0.3428	0.02	0.76681	2.91715	0.170196	0.1488	0.003	0.18416	1900.13	110.859	2111.43	129.702	2332.18	47.0198	1830.15	104.96	0.0546405	5.73505	3.8	5.73505
BTW02_37	99.9	8.7	1.147	0.092	0.96193	0.87184	0.0699296	0.629	0.012	-0.29451	4925.52	395.072	4685.11	408.013	4576.46	87.3093	3299.76	446.537	0.0303053	13.5324	0.29	13.5324
BTW02_38	8.77	0.58	0.3238	0.018	0.67451	3.08833	0.17168	0.1979	0.0066	-0.29185	1808.26	100.521	2314.38	153.06	2808.96	93.6792	1627.59	88.9056	0.0614405	5.46241	0.91	5.46241
BTW02_39	10.47	0.64	0.2667	0.015	0.46977	3.74953	0.210885	0.2902	0.0093	0.20885	1524.03	85.716	2477.27	151.428	3418.68	109.558	1175.54	65.9426	0.0850674	5.60957	0.56	5.60957
BTW02_40	6.61	0.36	0.3158	0.017	0.56846	3.16656	0.170461	0.1518	0.0027	0.49796	1769.19	95.238	2060.68	112.231	2366.3	42.0884	1681.81	88.2632	0.0594598	5.24811	2.8	5.24811
BTW02_41	12.85	0.88	0.392	0.024	0.6405	2.55102	0.156185	0.241	0.01	0.1124	2132.1	130.537	2668.72	182.76	3126.59	129.734	1862.63	114.834	0.0536876	6.16516	0.29	6.16516
BTW02_42	7.34	0.41	0.3113	0.017	0.57645	3.21234	0.175425	0.1706	0.0031	0.2252	1747.1	95.4087	2153.69	120.302	2563.54	46.5825	1620.55	86.1193	0.0617075	5.3142	1.1	5.3142
BTW02_43	11.99	0.89	0.3014	0.018	0.688	3.31785	0.198146	0.281	0.011	-0.29174	1698.25	101.422	2603.62	193.263	3368.5	131.863	1348.16	80.7084	0.0741749	5.98654	0.45	5.98654
BTW02_44	17.49	1.1	0.3977	0.022	0.77057	2.51446	0.139095	0.3209	0.0082	-0.31828	2158.44	119.401	2962.11	186.296	3574.15	91.3308	1680.3	92.9671	0.0595131	5.53276	0.86	5.53276
BTW02_45	6.93	0.41	0.3278	0.018	0.6597	3.05064	0.167515	0.1549	0.0036	-0.012348	1827.71	100.362	2102.51	124.391	2400.74	55.795	1738.27	93.4395	0.0575285	5.37543	3.7	5.37543
BTW02_46	29.8	2	0.516	0.03	0.63657	1.93798	0.112673	0.417	0.014	0.15693	2682.19	155.941	3480.24	233.573	3971.54	133.337	1875.5	116.947	0.0533192	6.23551	0.11	6.23551
BTW02_47	36.9	7.2	0.589	0.071	0.97886	1.69779	0.204657	0.443	0.036	-0.82251	2985.37	359.866	3690.87	720.169	4061.87	330.084	2068.85	282.61	0.0483359	13.6602	0.083	13.6602
BTW02_48	5.54	0.31	0.264	0.014	0.36772	3.78788	0.200872	0.1546	0.0028	0.43737	1510.27	80.0903	1906.83	106.7	2397.44	43.4206	1406.3	72.1211	0.0711084	5.12842	1.5	5.12842
BTW02_49	30.7	2.2	0.543	0.033	0.77481	1.84162	0.111922	0.409	0.012	-0.22159	2795.99	169.922	3509.49	251.494	3942.5	115.672	2015.93	129.028	0.0496049	6.40044	0.19	6.40044
BTW02_50	6.34	0.36	0.2943	0.016	0.32095	3.39789	0.184731	0.1564	0.0031	0.42107	1662.98	90.4101	2024	114.928	2417.11	47.9094	1560.57	82.3798	0.0640792	5.27883	2.5	5.27883
BTW02_51	52.4	4	0.668	0.045	0.7753	1.49701	0.100846	0.566	0.018	0.13824	3298.15	222.181	4039	308.321	4423.05	140.662	1775.01	140.908	0.0563378	7.93846	0.022	7.93846
BTW02_52	5.43	0.3	0.28	0.015	0.58993	3.57143	0.191327	0.1393	0.0021	0.33543	1591.36	85.2516	1889.6	104.398	2218.52	33.4451	1517.42	78.7175	0.0659011	5.18757	1.7	5.18757
BTW02_53	9.06	0.49	0.3538	0.019	0.33117	2.82646	0.151788	0.1862	0.0035	0.46348	1952.72	104.866	2344.08	126.777	2708.88	50.9189	1804.39	95.2486	0.0554204	5.27871	0.9	5.27871
BTW02_54	25.1	1.8	0.46	0.028	0.87848	2.17391	0.132325	0.399	0.012	-0.41276	2439.56	148.495	3312.11	237.522	3905.31	117.453	1711.97	107.787	0.0584122	6.2961	0.65	6.2961
BTW02_55	4.808	0.27	0.2856	0.016	0.55826	3.5014	0.196157	0.1217	0.0023	0.43166	1619.5	90.7285	1786.3	100.312	1981.3	37.4444	1579.43	85.847	0.0633139	5.43531	2.2	5.43531
BTW02_56	15	2.6	0.305	0.026	0.97357	3.27869	0.279495	0.34	0.031	-0.87592	1716.06	146.287	2815.24	487.975	3662.77	333.958	1239.77	119.76	0.08066	9.65985	0.13	9.65985
BTW02_57	31.7	3.5	0.456	0.037	0.87484	2.19298	0.177939	0.492	0.028	-0.27017	2421.87	196.512	3541.02	390.965	4217.42	240.016	1389.42	137.599	0.0719726	9.90337	0.035	9.90337
BTW02_58	16.5	1.4	0.396	0.023	0.81176	2.52525	0.146669	0.299	0.015	-0.47833	2150.59	124.908	2906.23	246.589	3465.05	173.832	1731.06	105.117	0.0577682	6.07242	0.77	6.07242
BTW02_59	40.8	5.8	0.516	0.057	0.98685	1.93798	0.21408	0.562	0.023	-0.85021	2682.19	296.289	3790.32	538.82	4412.7	180.591	1317.87	161.539	0.07588	12.2575	0.23	12.2575
BTW02_60	21.2	1.5	0.4473	0.025	0.83184	2.23564	0.124952	0.338	0.011	-0.43169	2383.24	133.201	3147.78	222.72	3653.75	118.909	1848.67	106.304	0.0540931	5.75028	0.36	5.75028
BTW02_61	9.49	0.64	0.2289	0.013	0.66805	4.36872	0.248114	0.2967	0.0091	-0.011773	1328.73	75.4631	2386.58	160.949	3453.08	105.908	998.351	56.6585	0.100165	5.6752	0.89	5.6752
BTW02_62	12.53	0.82	0.361	0.021	0.73642	2.77008	0.161141	0.2506	0.0058	-0.19709	1986.91	115.582	2644.98	173.095	3188.56	73.7975	1690.53	96.7117	0.059153	5.72078	0.64	5.72078
BTW02_63	5.29	0.31	0.2801	0.015	0.58083	3.57015	0.19119	0.1366	0.0027	0.19151	1591.87	85.2481	1867.25	109.423	2184.53	43.1789	1522.86	79.0408	0.0656661	5.1903	6.5	5.1903
BTW02_64	16.16	0.92	0.3869	0.022	0.64835	2.58465	0.146969	0.3033	0.0062	0.19422	2108.44	119.89	2886.31	164.32	3487.16	71.2838	1678.95	94.2747	0.0595609	5.61509	0.27	5.61509
BTW02_65	13.21	0.86	0.3032	0.017	0.72997	3.29815	0.184923	0.3143	0.0092	-0.25292	1707.16	95.7179	2694.77	175.436	3542.17	103.684	1286.76	72.0859	0.0777147	5.60213	0.69	5.60213
BTW02_66	104.4	7.8	1.152	0.081	0.86781	0.868056	0.0610352	0.653	0.019	0.044234	4940.52	347.38	4729.41	353.347	4630.6	134.734	2953.22	308.103	0.0338614	10.4328	0.048	10.4328
BTW02_67	7.04	0.41	0.2961	0.016	0.4063	3.37724	0.182492	0.1728	0.0045	0.30883	1671.94	90.3446	2116.49	123.262	2584.95	67.3164	1538.37	80.9158	0.0650037	5.25983	0.63	5.25983
BTW02_68	6.99	0.45	0.3334	0.018	0.69688	2.9994	0.161935	0.1511	0.0048	-0.34268	1854.84	100.141	2110.16	135.847	2358.41	74.9198	1775.65	94.2798	0.0563175	5.3096	5.4	5.3096
BTW02_69	7.22	0.4	0.3072	0.017	0.40168	3.25521	0.180139	0.1718	0.0034	0.28449	1726.91	95.5649	2138.98	118.503	2575.26	50.9655	1597.12	85.972	0.0626125	5.38292	5.7	5.38292
BTW02_70	5.75	0.37	0.2904	0.016	0.36385	3.44353	0.189726	0.1419	0.0052	0.13534	1643.53	90.5525	1938.92	124.765	2250.52	82.4716	1567.56	84.2196	0.0637933	5.37265	4.1	5.37265
BTW02_71	5.158	0.28	0.2899	0.016	0.37619	3.44947	0.190381	0.1288	0.0022	0.51139	1641.03	90.5708	1845.71	100.194	2081.66	35.5563	1589.39	85.1328	0.0629173	5.35633	3.3	5.35633
BTW02_72	3.826	0.21	0.2646	0.015	0.63143	3.77929	0.214245	0.1051	0.0017	0.50074	1513.33	85.7899	1598.23	87.7231	1716.06	27.7575	1494.85	81.9618	0.0668965	5.48296	7.2	5.48296
BTW02_73	12.72	0.71	0.3495	0.019	0.56609	2.86123	0.155546	0.2663	0.0049	0.10897	1932.21	105.041	2659.14	148.427	3284.37	60.4334	1599.78	85.1427	0.0625085	5.32214	0.17	5.32214
BTW02_74	4.964	0.27	0.2935	0.016	0.56501	3.40716	0.185739	0.1232	0.0017	0.25823	1659	90.4393	1813.21	98.6235	2003.08	27.6399	1619.17	85.7186	0.0617601	5.29399	6	5.29399
BTW02_75	28.9	2.6	0.419	0.03	0.95766	2.38663	0.170881	0.494	0.015	-0.75375	2255.94	161.523	3450.13	310.392	4223.4	128.241	1259.69	97.1615	0.0793847	7.71313	0.62
BTW02_76	5.727	0.31	0.3219	0.017	0.66419	3.10655	0.164062	0.1303	0.0018	0.21239	1799	95.0078	1935.45	104.765	2102.01	29.0378	1757.77	90.7503	0.0568903	5.16281	2.2	5.16281
BTW02_77	18.6	1.1	0.4092	0.023	0.59354	2.44379	0.137359	0.331	0.0078	0.41851	2211.26	124.289	3021.3	178.679	3621.72	85.3456	1702.91	95.6098	0.0587231	5.6145	0.23	5.6145
BTW02_78	11.82	0.76	0.3251	0.019	0.78652	3.07598	0.179771	0.2649	0.0063	-0.43522	1814.59	106.051	2590.25	166.547	3276.09	77.9137	1490.21	85.2963	0.0671047	5.72378	0.33	5.72378
BTW02_79	4.565	0.25	0.29	0.016	0.5282	3.44828	0.19025	0.1139	0.0019	0.38343	1641.53	90.5671	1742.9	95.4492	1862.55	31.0697	1617.6	86.6742	0.0618201	5.35821	14	5.35821
BTW02_80	8.06	0.49	0.3148	0.018	0.53622	3.17662	0.181637	0.1837	0.0043	0.11693	1764.28	100.88	2237.77	136.043	2686.56	62.8863	1611.82	89.8469	0.0620417	5.57426	1.8	5.57426
BTW02_81	16	1.5	0.39	0.025	0.94645	2.5641	0.164365	0.291	0.013	-0.76052	2122.83	136.079	2876.8	269.7	3422.96	152.916	1724.83	112.571	0.0579767	6.52652	0.14	6.52652
BTW02_82	7.6	0.48	0.3018	0.017	0.30787	3.31345	0.186642	0.181	0.0066	0.22618	1700.23	95.7716	2184.86	137.991	2662.05	97.0694	1551.39	85.58	0.0644583	5.51634	1.1	5.51634
BTW02_83	4.7	0.26	0.2778	0.016	0.68965	3.59971	0.207327	0.1238	0.0023	0.19918	1580.27	91.0164	1767.24	97.7622	2011.7	37.3741	1533.67	85.5721	0.065203	5.57955	2.5	5.57955
BTW02_84	14.7	1.7	0.376	0.025	0.95364	2.65957	0.176833	0.281	0.02	-0.85093	2057.57	136.807	2796.02	323.349	3368.5	239.751	1686.39	119.146	0.0592982	7.06516	2.3	7.06516
BTW02_85	7.7	0.42	0.2807	0.016	0.49146	3.56252	0.203065	0.2018	0.0041	0.49486	1594.89	90.9091	2196.6	119.815	2840.81	57.7171	1405.88	77.7078	0.0711297	5.52734	3.1	5.52734
BTW02_86	22.16	1.3	0.2343	0.013	0.48629	4.26803	0.236809	0.686	0.018	0.56354	1357	75.2921	3190.77	187.184	4701.67	123.367	312.521	38.6902	0.319978	12.38	0.24	12.38
BTW02_87	13.12	1	0.365	0.022	0.81955	2.73973	0.165134	0.2637	0.0096	-0.45883	2005.83	120.899	2688.32	204.902	3268.95	119.006	1677.99	100.95	0.059595	6.01612	4.1	6.01612
BTW02_88	7.87	0.47	0.3051	0.017	0.42572	3.27761	0.182627	0.1855	0.005	0.083274	1716.55	95.6451	2216.25	132.356	2702.67	72.8482	1559.17	84.7155	0.0641369	5.43338	0.49	5.43338
BTW02_89	13.78	0.87	0.3665	0.021	0.76459	2.72851	0.15634	0.2792	0.0096	-0.38992	2012.91	115.337	2734.71	172.656	3358.46	115.477	1647.32	94.4986	0.0607046	5.7365	0.5	5.7365
BTW02_90	4.97	0.28	0.2824	0.016	0.71015	3.54108	0.200628	0.1263	0.0018	0.17099	1603.44	90.8463	1814.23	102.21	2047.1	29.1748	1553.84	85.3018	0.0643568	5.48975	2.4	5.48975
BTW02_91	50.3	4	0.597	0.041	0.7065	1.67504	0.115036	0.598	0.025	-0.0080924	3017.74	207.248	3998.26	317.953	4503.15	188.259	1391.14	135.815	0.0718833	9.76282	0.021	9.76282
BTW02_92	28.9	1.8	0.487	0.028	0.88791	2.05339	0.118059	0.4271	0.0071	-0.28225	2557.68	147.054	3450.13	214.887	4007.34	66.617	1724.89	99.7475	0.0579748	5.78285	1.3	5.78285
BTW02_93	15.5	1.3	0.1932	0.014	0.88576	5.17598	0.375071	0.593	0.016	-0.23617	1138.69	82.5135	2846.48	238.737	4490.94	121.172	402.953	37.962	0.248168	9.42093	0.22	9.42093
BTW02_94	4.8	0.29	0.2813	0.015	0.6513	3.55492	0.189562	0.1251	0.0032	-0.1421	1597.91	85.2065	1784.9	107.838	2030.21	51.9319	1550.12	80.231	0.0645112	5.1758	1.7	5.1758
BTW02_95	70.6	6.6	0.779	0.067	0.89026	1.2837	0.110408	0.664	0.027	0.11682	3713.47	319.387	4336.8	405.423	4654.71	189.273	1495.77	186.762	0.066855	12.486	0.07	12.486
BTW02_96	38.9	2.4	0.567	0.032	0.6533	1.76367	0.0995368	0.497	0.014	0.052965	2895.49	163.414	3743.08	230.936	4232.34	119.221	1755.92	110.046	0.0569502	6.26717	0.11	6.26717
BTW02_97	9.07	0.5	0.3544	0.02	0.36484	2.82167	0.159237	0.1872	0.0046	0.62317	1955.57	110.36	2345.09	129.277	2717.72	66.7815	1805.18	100.328	0.0553962	5.5578	0.46	5.5578
BTW02_99	8.38	0.48	0.3233	0.018	0.54397	3.0931	0.172211	0.1893	0.0044	-0.020931	1805.83	100.541	2273.02	130.197	2736.09	63.5964	1643.16	89.3459	0.0608585	5.43746	0.77	5.43746
BTW02_100	23.19	1.5	0.4496	0.025	0.78353	2.2242	0.123677	0.371	0.011	-0.41255	2393.47	133.089	3234.95	209.246	3795.51	112.535	1757.7	100.764	0.0568927	5.73274	0.17	5.73274
BTW02_101	15.36	1	0.3974	0.022	0.75098	2.51636	0.139305	0.2797	0.0085	-0.44986	2157.06	119.414	2837.83	184.755	3361.26	102.148	1788.26	99.2827	0.0559203	5.55192	3.5	5.55192
BTW02_102	21.7	1.5	0.427	0.025	0.77007	2.34192	0.137115	0.371	0.011	-0.33384	2292.18	134.203	3170.4	219.152	3795.51	112.535	1663.95	99.6213	0.0600979	5.98703	0.39	5.98703
BTW02_103	7.09	0.45	0.2097	0.012	0.82462	4.76872	0.272888	0.2483	0.0081	-0.45247	1227.22	70.2271	2122.79	134.733	3173.96	103.54	987.077	55.796	0.101309	5.65265	0.69	5.65265
BTW02_104	6.95	0.46	0.2881	0.016	0.46941	3.47102	0.192767	0.1759	0.0066	-0.055509	1632.03	90.6367	2105.06	139.328	2614.59	98.1028	1491.66	81.0175	0.0670396	5.43138	0.33	5.43138
BTW02_105	6.27	0.39	0.3237	0.018	0.62714	3.08928	0.171786	0.1434	0.0038	-0.029082	1807.77	100.525	2014.27	125.29	2268.67	60.1181	1740.54	94.7718	0.0574534	5.44497	4.9	5.44497
BTW02_106	9.68	0.57	0.3505	0.02	0.56038	2.85307	0.1628	0.2008	0.0046	0.26316	1936.99	110.527	2404.81	141.605	2832.71	64.8928	1754.7	98.3377	0.0569896	5.60423	0.52	5.60423
BTW02_107	13.23	0.79	0.3618	0.02	0.79684	2.76396	0.152789	0.2666	0.005	-0.27624	1990.7	110.044	2696.2	160.998	3286.14	61.6305	1656.12	89.8133	0.0603821	5.42312	0.4	5.42312
BTW02_108	29.1	2.6	0.522	0.031	0.87843	1.91571	0.113768	0.403	0.019	-0.68103	2707.66	160.8	3456.9	308.864	3920.31	184.828	1950.97	130.706	0.0512565	6.69955	0.22	6.69955
BTW02_109	3.825	0.21	0.2639	0.015	0.79085	3.78931	0.215384	0.1053	0.0015	0.5244	1509.76	85.8146	1598.02	87.7345	1719.56	24.4951	1490.67	81.9298	0.0670838	5.49616	12	5.49616
BTW02_110	74.6	4.3	0.832	0.046	0.73626	1.20192	0.0664525	0.6367	0.0085	0.17781	3902.71	215.775	4392	253.158	4594.07	61.3312	1853.65	114.272	0.0539475	6.16467	0.099	6.16467
BTW02_111	10.02	0.59	0.3335	0.018	0.59816	2.9985	0.161838	0.2201	0.0062	-0.032772	1855.32	100.137	2436.63	143.474	2981.42	83.9837	1627.83	86.3451	0.0614314	5.3043	0.79	5.3043
Sample 2		Location: Bunatrahir West			Grid Coordinates: 54°18'31.6''N, -9°23'35.6''W
Apatite	207U/235Pb	2σ	206U/238Pb	2σ	ρ	238U/206Pb	2σ	207Pb/206Pb	2σ	ρ	206Pb/238U (Ma)	2σ (Ma)	207Pb/235U (Ma)	2σ (Ma)	207Pb/206Pb (Ma)	2σ (Ma)	207Pb corrected Age (Ma)	2σ (Ma)		% age error	U (ppm)	% error
BTW05_1	123.1	11	1.202	0.1	0.8794	0.831947	0.0692135	0.744	0.023	-0.04195	5088.58	423.343	4895.25	437.431	4818.13	148.948	1796.84	234.531	0.0556531	13.0524	0.054	13.0524
BTW05_2	9.26	0.67	0.1407	0.0085	0.84223	7.10732	0.429369	0.468	0.015	-0.45515	848.62	51.267	2364.07	171.05	4143.44	132.803	429.946	30.3896	0.232587	7.06824	1.3	7.06824
BTW05_3	30.97	1.7	0.3304	0.019	0.58741	3.02663	0.17405	0.686	0.013	0.54003	1840.32	105.83	3518.1	193.115	4701.67	89.0987	458.173	44.5562	0.218258	9.72476	0.32	9.72476
BTW05_4	5.62	0.31	0.2813	0.015	0.48981	3.55492	0.189562	0.1451	0.0026	0.33937	1597.91	85.2065	1919.17	105.862	2288.96	41.0152	1513.71	78.207	0.0660628	5.16657	0.64	5.16657
BTW05_5	5.39	0.3	0.2599	0.014	0.086001	3.84763	0.20726	0.1501	0.0035	0.45138	1489.33	80.2256	1883.27	104.82	2347.07	54.7284	1392.69	72.613	0.0718034	5.21386	0.42	5.21386
BTW05_6	7.75	0.46	0.1302	0.0075	0.39366	7.68049	0.442425	0.437	0.013	0.44154	789.006	45.4497	2202.42	130.724	4041.55	120.229	428.939	27.67	0.233133	6.45081	0.8	6.45081
BTW05_7	15.34	0.84	0.1979	0.011	0.41524	5.05306	0.280867	0.561	0.011	0.47243	1164.03	64.701	2836.59	155.328	4410.1	86.4725	464.559	31.1363	0.215258	6.70233	0.62	6.70233
BTW05_8	26.3	5.6	0.401	0.057	0.99138	2.49377	0.354475	0.431	0.037	-0.92892	2173.64	308.972	3357.76	714.96	4020.92	345.183	1387.11	213.611	0.0720924	15.3997	0.29	15.3997
BTW05_9	13.02	0.8	0.3736	0.02	0.55842	2.67666	0.14329	0.2557	0.0076	-0.21781	2046.32	109.546	2681.1	164.738	3220.41	95.718	1737.85	92.6061	0.0575425	5.32879	0.17	5.32879
BTW05_10	9.14	0.5	0.357	0.019	0.45907	2.80112	0.149079	0.1864	0.0032	0.46311	1967.94	104.736	2352.12	128.672	2710.66	46.5349	1820.24	95.2715	0.0549378	5.23401	0.17	5.23401
BTW05_11	11.12	0.71	0.1586	0.0094	0.7815	6.30517	0.373699	0.5	0.011	-0.060028	948.992	56.2454	2533.24	161.744	4241.21	93.3066	445.979	29.5737	0.224226	6.63118	0.43	6.63118
BTW05_12	15.44	0.9	0.284	0.016	0.35321	3.52113	0.198373	0.388	0.012	0.44003	1611.48	90.7874	2842.79	165.706	3863.22	119.481	1055.27	62.1841	0.0947629	5.89274	0.081	5.89274
BTW05_13	45.8	2.6	0.603	0.035	0.54082	1.65837	0.0962572	0.555	0.014	0.41093	3041.91	176.562	3905.04	221.684	4394.39	110.849	1618.03	107.592	0.0618034	6.64954	0.054	6.64954
BTW05_14	94.8	6.6	0.946	0.054	0.61454	1.05708	0.0603409	0.74	0.031	0.045966	4291.87	244.99	4632.44	322.512	4810.42	201.518	1218.85	211.884	0.0820446	17.384	0.011	17.384
BTW05_15	6.42	0.41	0.2911	0.016	0.52995	3.43525	0.188815	0.1586	0.005	-0.22018	1647.02	90.5269	2035.01	129.962	2440.79	76.948	1539.77	82.4469	0.0649446	5.35449	0.53	5.35449
BTW05_16	97.2	6.4	0.893	0.056	0.90884	1.11982	0.0702239	0.792	0.013	-0.097595	4113.86	257.98	4657.57	306.671	4907.42	80.551	548.638	105.811	0.18227	19.2862	0.095	19.2862
BTW05_17	21.88	1.2	0.2552	0.014	0.35944	3.9185	0.214965	0.618	0.015	0.39801	1465.24	80.3814	3178.42	174.319	4550.9	110.459	489.401	40.468	0.204331	8.26889	0.15	8.26889
BTW05_19	13.19	1	0.1727	0.012	0.86067	5.79039	0.402343	0.55	0.016	-0.080865	1026.97	71.3587	2693.34	204.196	4381.15	127.452	418.193	36.0013	0.239124	8.60878	0.19	8.60878
BTW05_20	8	0.45	0.3491	0.019	0.2386	2.86451	0.155903	0.1676	0.0038	0.53382	1930.3	105.058	2231.02	125.495	2533.82	57.4493	1821.91	97.597	0.0548874	5.35684	0.4	5.35684
BTW05_21	45.9	3.6	0.599	0.045	0.8456	1.66945	0.125418	0.539	0.017	0.22851	3025.81	227.314	3907.21	306.448	4351.58	137.248	1680.29	139.951	0.0595135	8.32895	0.03	8.32895
BTW05_22	20.7	1.9	0.247	0.018	0.91969	4.04858	0.295038	0.602	0.018	-0.46648	1422.99	103.699	3124.65	286.804	4512.83	134.935	504.94	50.0485	0.198043	9.91179	0.71	9.91179
BTW05_23	20.7	1.6	0.394	0.024	0.55106	2.53807	0.154603	0.369	0.014	0.027797	2141.35	130.438	3124.65	241.519	3787.32	143.692	1534.33	97.4237	0.0651752	6.34961	0.35	6.34961
BTW05_24	114.1	6.7	1.119	0.063	0.77776	0.893655	0.050313	0.741	0.015	0.028904	4840.9	272.544	4818.81	282.962	4812.35	97.416	1613.37	148.154	0.0619822	9.18293	0.045	9.18293
BTW05_25	204	52	1.81	0.4	0.95862	0.552486	0.122096	0.841	0.055	-0.30892	6660.34	1471.9	5404.89	1377.72	4992.81	326.521	-73.925	828.578	-1.35272	-1120.84	0.041	-1120.84
BTW05_26	6.53	0.4	0.1235	0.007	0.71331	8.09717	0.458949	0.3836	0.0081	-0.0054305	750.677	42.5485	2049.95	125.571	3846.01	81.2113	457.845	26.6877	0.218415	5.82897	0.29	5.82897
BTW05_27	128.3	10	1.174	0.08	0.67769	0.851789	0.0580435	0.792	0.038	0.062205	5006.08	341.13	4936.93	384.796	4907.42	235.457	909.607	323.854	0.109938	35.6037	0.035
BTW05_28	41.1	2.9	0.501	0.032	0.62724	1.99601	0.12749	0.585	0.023	0.14975	2618.09	167.223	3797.58	267.956	4471.18	175.79	1181.16	107.615	0.0846626	9.11092	0.1	9.11092
BTW05_29	5.77	0.33	0.1125	0.006	0.62553	8.88889	0.474074	0.3675	0.0077	0.063886	687.251	36.6534	1941.92	111.063	3781.14	79.224	430.872	23.6175	0.232088	5.48132	0.25	5.48132
BTW05_30	3.53	0.26	0.1924	0.011	0.66659	5.19751	0.297155	0.1312	0.0048	-0.21935	1134.36	64.8544	1533.96	112.983	2114.09	77.3447	1064.12	58.9743	0.0939741	5.54206	1	5.54206
BTW05_31	6.57	0.38	0.3178	0.018	0.41575	3.14663	0.178223	0.1501	0.0035	0.47928	1778.98	100.76	2055.33	118.878	2347.07	54.7284	1695.74	93.7851	0.0589712	5.53062	1.4	5.53062
BTW05_32	5.28	0.32	0.2288	0.013	0.43915	4.37063	0.248331	0.1681	0.005	0.2253	1328.21	75.4663	1865.63	113.069	2538.81	75.515	1202.25	66.2492	0.0831776	5.51045	0.13	5.51045
BTW05_33	27.74	1.7	0.3134	0.018	0.77422	3.19081	0.183263	0.648	0.015	-0.082938	1757.42	100.936	3409.95	208.973	4619.5	106.933	533.691	48.2188	0.187374	9.03497	0.38	9.03497
BTW05_34	28.31	1.6	0.3111	0.017	0.78394	3.2144	0.17565	0.6607	0.0098	0.1176	1746.12	95.4163	3429.89	193.848	4647.52	68.9356	495.765	37.9944	0.201708	7.66378	0.24	7.66378
BTW05_35	5.137	0.27	0.3017	0.016	0.47885	3.31455	0.17578	0.1241	0.0015	0.40468	1699.73	90.1416	1842.25	96.8282	2015.99	24.3674	1661.57	85.7113	0.060184	5.15845	1.8	5.15845
BTW05_36	14.34	0.81	0.2927	0.017	0.5599	3.41647	0.198428	0.3547	0.0081	0.46486	1655.01	96.1228	2772.47	156.604	3727.31	85.1175	1158.42	66.9965	0.0863243	5.78342	0.43	5.78342
BTW05_37	48	3	0.474	0.028	0.70471	2.1097	0.124624	0.74	0.018	0.17899	2501.08	147.743	3951.69	246.981	4810.42	117.01	461.529	74.1011	0.216671	16.0556	0.12	16.0556
BTW05_38	31.2	2.9	0.486	0.031	0.82534	2.05761	0.131247	0.463	0.023	-0.43125	2553.35	162.868	3525.38	327.679	4127.52	205.039	1595.42	122.396	0.0626793	7.67169	0.28	7.67169
BTW05_39	11.24	0.63	0.3706	0.02	0.34416	2.69833	0.145619	0.2179	0.005	0.41337	2032.22	109.672	2543.24	142.548	2965.24	68.0412	1814.9	96.7388	0.0550995	5.33026	0.41	5.33026
BTW05_40	10.15	0.6	0.3467	0.019	0.33514	2.88434	0.158069	0.2111	0.0064	0.4694	1918.82	105.156	2448.53	144.741	2914.01	88.3451	1712.58	92.5603	0.0583914	5.40472	0.37	5.40472
BTW05_41	5.02	0.28	0.2942	0.016	0.36752	3.39905	0.184857	0.1218	0.0025	0.26777	1662.48	90.4138	1822.7	101.665	1982.76	40.697	1625.57	85.9424	0.0615169	5.28692	0.94	5.28692
BTW05_42	6.26	0.36	0.1162	0.0065	0.39412	8.60585	0.481395	0.3868	0.0098	0.41867	708.655	39.6408	2012.87	115.756	3858.54	97.7604	427.751	25.1684	0.233781	5.8839	0.49	5.8839
BTW05_43	8.79	0.52	0.3034	0.017	0.49175	3.29598	0.184679	0.2094	0.0059	0.41313	1708.15	95.7103	2316.46	137.037	2900.91	81.7352	1502.97	82.2672	0.0665349	5.47364	0.27	5.47364
BTW05_44	7.52	0.43	0.3314	0.018	0.51077	3.0175	0.163896	0.1655	0.0031	0.12209	1845.16	100.22	2175.37	124.39	2512.64	47.0646	1734.7	92.1565	0.0576467	5.31252	0.28	5.31252
BTW05_45	37.68	2.1	0.3954	0.022	0.65652	2.52908	0.140718	0.6903	0.0092	0.26768	2147.82	119.505	3711.55	206.854	4710.66	62.7815	548.443	44.739	0.182334	8.15746	0.14	8.15746
BTW05_46	3.82	0.46	0.1953	0.012	0.62772	5.12033	0.314613	0.148	0.016	-0.31508	1150.02	70.6619	1596.97	192.305	2322.95	251.129	1057.17	66.1375	0.094592	6.25607	0.42	6.25607
BTW05_47	10.12	0.62	0.1447	0.0085	0.549	6.91085	0.405959	0.507	0.017	0.47187	871.185	51.1754	2445.8	149.841	4261.69	142.897	397.883	30.0464	0.25133	7.55157	0.11	7.55157
BTW05_48	18.38	0.99	0.2266	0.012	0.3151	4.41306	0.233702	0.589	0.014	0.69243	1316.66	69.7258	3009.84	162.119	4481.09	106.512	484.473	35.8469	0.20641	7.39916	0.46	7.39916
BTW05_49	105.6	7.3	1.018	0.065	0.66359	0.982318	0.0627217	0.744	0.026	0.14721	4526.07	288.993	4740.91	327.733	4818.13	168.376	1328.32	198.626	0.0752833	14.9533	0.032	14.9533
BTW05_50	6.98	0.44	0.1291	0.0078	0.4649	7.74593	0.467996	0.394	0.014	0.42864	782.729	47.2911	2108.89	132.939	3886.34	138.093	468.383	31.024	0.213501	6.62364	0.41	6.62364
BTW05_51	6.39	0.38	0.2164	0.012	0.59042	4.62107	0.256252	0.2116	0.005	0.038932	1262.82	70.0272	2030.9	120.773	2917.84	68.9471	1073.78	57.8912	0.0931289	5.39134	0.14	5.39134
BTW05_52	4.78	0.3	0.2288	0.013	0.26063	4.37063	0.248331	0.1493	0.0053	0.30564	1328.21	75.4663	1781.39	111.803	2337.92	82.994	1231.27	67.8725	0.0812167	5.51239	0.43	5.51239
BTW05_53	15.63	0.87	0.406	0.023	0.46057	2.46305	0.139533	0.2817	0.0074	0.59795	2196.61	124.438	2854.45	158.885	3372.38	88.5893	1822.78	103.112	0.0548613	5.65687	0.38	5.65687
BTW05_54	6.48	0.38	0.2997	0.016	0.59704	3.33667	0.178134	0.1561	0.0033	0.32319	1689.82	90.214	2043.19	119.817	2413.85	51.0295	1589.24	82.4955	0.0629233	5.19089	0.8	5.19089
BTW05_55	6.93	0.39	0.3269	0.018	0.66112	3.05904	0.168439	0.1536	0.0023	0.12769	1823.34	100.398	2102.51	118.323	2386.4	35.7338	1736.27	93.4019	0.0575948	5.37946	1.5	5.37946
BTW05_56	11	0.63	0.2746	0.015	0.25199	3.64166	0.198925	0.2905	0.0094	0.43565	1564.11	85.4393	2523.13	144.507	3420.29	110.674	1209.87	66.0754	0.0826533	5.46135	0.1	5.46135
BTW05_57	94.4	8.5	0.906	0.073	0.95934	1.10375	0.0889337	0.748	0.014	-0.50609	4157.98	335.025	4628.2	416.734	4825.81	90.3226	1053.42	127.485	0.0949293	12.1021	0.52	12.1021
BTW05_58	4.894	0.27	0.2922	0.015	0.44795	3.42231	0.175683	0.1216	0.0022	0.13887	1652.51	84.8313	1801.22	99.3728	1979.83	35.8194	1615.17	80.5556	0.0619131	4.98745	1.4	4.98745
BTW05_59	8.89	0.59	0.147	0.0089	0.84159	6.80272	0.411865	0.4331	0.009	0.0081617	884.125	53.5286	2326.77	154.42	4028.17	83.7071	489.596	30.9351	0.20425	6.3185	0.24	6.3185
BTW05_60	10.92	0.61	0.1701	0.0094	0.085491	5.87889	0.324877	0.4657	0.0097	0.26843	1012.66	55.9613	2516.34	140.565	4136.14	86.1511	524.982	31.3492	0.190483	5.97148	0.67	5.97148
BTW05_61	3.72	0.92	0.201	0.024	0.98361	4.97512	0.594045	0.1189	0.0089	-0.87259	1180.69	140.978	1575.68	389.684	1939.76	145.196	1127.08	130.201	0.0887245	11.552	7.1	11.552
BTW05_62	21.21	1.2	0.4435	0.025	0.39132	2.25479	0.127102	0.3442	0.0082	0.54429	2366.29	133.387	3148.24	178.118	3681.52	87.7061	1813.45	103.007	0.0551434	5.68014	0.21	5.68014
BTW05_63	27.8	1.8	0.416	0.026	0.4371	2.40385	0.15024	0.482	0.019	0.40576	2242.29	140.143	3412.07	220.925	4187.08	165.051	1287.24	94.218	0.0776853	7.31936	0.039	7.31936
BTW05_64	15.08	0.84	0.4062	0.022	0.2158	2.46184	0.133335	0.2712	0.0066	0.43762	2197.52	119.019	2820.3	157.099	3312.98	80.6255	1851.76	100.061	0.0540027	5.40356	0.12	5.40356
BTW05_65	100.2	6.6	0.975	0.059	0.88077	1.02564	0.0620644	0.741	0.016	-0.087454	4387.23	265.483	4688.12	308.799	4812.35	103.91	1269.5	135.535	0.0787713	10.6763	0.068	10.6763
BTW05_67	14.8	0.84	0.3685	0.02	0.30646	2.7137	0.147284	0.2895	0.0063	0.31877	2022.34	109.761	2802.47	159.059	3414.93	74.3144	1631.16	87.3515	0.0613061	5.35518	0.28	5.35518
BTW05_68	29.12	1.6	0.3171	0.018	0.30986	3.15358	0.179011	0.675	0.015	0.613	1775.55	100.788	3457.57	189.976	4678.39	103.964	467.546	46.8408	0.213883	10.0184	0.17	10.0184
BTW05_69	1.504	0.1	0.075	0.0041	0.3205	13.3333	0.728889	0.144	0.0055	0.09864	466.209	25.4861	932.009	61.9687	2275.86	86.9254	416.577	22.5509	0.240052	5.41339	5	5.41339
BTW05_70	19.81	1.2	0.3075	0.018	0.88518	3.25203	0.190363	0.474	0.012	-0.33799	1728.39	101.174	3082.13	186.701	4162.32	105.375	950.026	60.1718	0.10526	6.3337	0.1	6.3337
BTW05_71	23.2	2.1	0.26	0.019	0.85543	3.84615	0.281065	0.647	0.027	-0.30051	1489.84	108.873	3235.37	292.857	4617.27	192.684	436.543	62.7028	0.229072	14.3635	0.26	14.3635
BTW05_72	26.97	1.6	0.419	0.024	0.26873	2.38663	0.136705	0.466	0.017	0.4794	2255.94	129.218	3382.38	200.66	4137.1	150.924	1347.06	88.5661	0.074236	6.57479	0.073	6.57479
BTW05_73	1.04	0.058	0.0715	0.004	0.60271	13.986	0.782434	0.1064	0.0021	0.24178	445.186	24.9055	723.917	40.3723	1738.63	34.3151	417.861	22.9484	0.239314	5.49187	8.9	5.49187
BTW05_74	5.74	0.44	0.117	0.0069	0.80434	8.54701	0.504054	0.354	0.013	-0.48022	713.273	42.0648	1937.41	148.512	3724.3	136.768	460.33	29.0554	0.217236	6.31186	1.6	6.31186
BTW05_75	4.25	0.26	0.2553	0.014	0.65947	3.91696	0.214796	0.1212	0.0026	0.1879	1465.75	80.378	1683.74	103.005	1973.97	42.3458	1417.15	75.1162	0.070564	5.3005	2.8	5.3005
BTW05_76	5.73	0.33	0.2985	0.016	0.47788	3.35008	0.179569	0.1392	0.0031	0.21837	1683.87	90.2575	1935.9	111.492	2217.28	49.3791	1615.5	84.2315	0.0619003	5.21395	2	5.21395
BTW05_77	5.2	0.29	0.278	0.015	0.57933	3.59712	0.194089	0.1347	0.0027	0.15033	1581.28	85.321	1852.62	103.319	2160.13	43.2989	1515.15	79.2146	0.0660002	5.22818	0.94	5.22818
BTW05_78	7.77	0.53	0.3185	0.019	0.87968	3.13972	0.187299	0.1808	0.0046	0.17736	1782.4	106.328	2204.74	150.388	2660.22	67.6826	1636.54	95.2794	0.0611046	5.82201	0.76	5.82201
BTW05_79	7.97	0.48	0.3312	0.018	0.55407	3.01932	0.164094	0.1759	0.0048	0.11473	1844.2	100.228	2227.63	134.161	2614.59	71.3475	1711.59	91.2101	0.0584252	5.32897	3.3	5.32897
BTW05_80	18.89	1	0.2324	0.013	0.32038	4.30293	0.240697	0.591	0.012	0.69193	1347.07	75.3522	3036.22	160.731	4486.03	91.0868	493.903	35.5089	0.202469	7.18945	0.26	7.18945
BTW05_81	6.96	0.52	0.2203	0.013	0.67461	4.53926	0.267864	0.2226	0.008	-0.22398	1283.46	75.7375	2106.34	157.37	2999.59	107.802	1076	62.3945	0.0929366	5.79873	0.33	5.79873
BTW05_82	21.17	1.2	0.2452	0.014	0.60326	4.0783	0.232856	0.622	0.012	0.40492	1413.67	80.7155	3146.41	178.351	4560.25	87.9791	460.628	35.7021	0.217095	7.75074	0.89	7.75074
BTW05_83	29	2.4	0.309	0.022	0.89317	3.23625	0.230412	0.668	0.017	-0.39349	1735.78	123.583	3453.52	285.808	4663.37	118.679	472.735	53.4997	0.211535	11.3171	0.83	11.3171
BTW05_84	56.3	4	0.663	0.045	0.73835	1.5083	0.102373	0.629	0.026	0.098168	3278.8	222.543	4110.58	292.048	4576.46	189.17	1409.74	147.555	0.0709349	10.4668	0.075	10.4668
BTW05_85	75	14	0.84	0.13	0.98975	1.19048	0.18424	0.637	0.024	-0.43373	3930.8	608.338	4397.35	820.839	4594.75	173.115	1876.77	314.064	0.053283	16.7343	0.038	16.7343
BTW05_86	4.93	0.28	0.2775	0.015	0.46847	3.6036	0.194789	0.1293	0.003	0.38626	1578.76	85.3383	1807.41	102.652	2088.47	48.4565	1522.2	79.7725	0.0656946	5.24062	3.1	5.24062
BTW05_87	2.46	0.17	0.2012	0.011	0.55637	4.97018	0.27173	0.089	0.0032	-0.13664	1181.76	64.6093	1260.36	87.0983	1404.16	50.4866	1168.79	61.6974	0.0855587	5.27875	2.1	5.27875
BTW05_88	6.74	0.39	0.3037	0.016	0.23547	3.29272	0.173472	0.1612	0.005	0.37024	1709.63	90.0694	2077.88	120.234	2468.29	76.5597	1600.06	82.3281	0.0624978	5.14532	2.2	5.14532
BTW05_89	6.28	0.49	0.2427	0.014	0.6223	4.12031	0.237678	0.1883	0.0092	-0.29963	1400.72	80.7996	2015.67	157.273	2727.37	133.254	1240.52	70.5283	0.0806115	5.68539	0.33	5.68539
BTW05_90	16.45	0.95	0.4161	0.023	0.32109	2.40327	0.132841	0.2903	0.0063	0.50655	2242.75	123.968	2903.33	167.669	3419.22	74.2028	1846.07	101.689	0.054169	5.50838	0.29	5.50838
BTW05_91	30.4	4.6	0.444	0.054	0.97483	2.25225	0.273923	0.473	0.021	-0.66164	2368.52	288.064	3499.83	529.58	4159.19	184.657	1411.84	176.855	0.0708294	12.5265	0.72	12.5265
BTW05_92	18.9	2.4	0.323	0.049	0.8465	3.09598	0.469668	0.446	0.024	0.4793	1804.36	273.727	3036.73	385.616	4071.92	219.117	1068.28	165.085	0.0936084	15.4534	1.1	15.4534
BTW05_93	38.39	2.1	0.3926	0.021	0.31184	2.54712	0.136244	0.708	0.014	0.56971	2134.88	114.194	3730.02	204.039	4747.04	93.868	481.722	52.3839	0.207589	10.8743	0.3	10.8743
Sample 3		Location: Bunatrahir West			Grid Coordinates: 54°18'31.6''N, -9°23'35.6''W
Apatite	207U/235Pb	2σ	206U/238Pb	2σ	ρ	238U/206Pb	2σ	207Pb/206Pb	2σ	ρ	206Pb/238U (Ma)	2σ (Ma)	207Pb/235U (Ma)	2σ (Ma)	207Pb/206Pb (Ma)	2σ (Ma)	207Pb corrected Age (Ma)	2σ (Ma)		% age error	U (ppm)	% error
BTW6b_1	43.2	2	0.535	0.044	0.5749	1.86916	0.153725	0.579	0.054	0.12883	2762.48	227.195	3847.01	178.102	4456.16	415.601	1301.81	217.45	0.0768159	16.7036	0.046
BTW6b_2	6.25	0.24	0.3152	0.026	0.68882	3.17259	0.261698	0.1422	0.013	0.29349	1766.24	145.693	2011.48	77.2407	2254.17	206.077	1698	138.83	0.0588927	8.17607	5.9
BTW6b_3	13.35	0.52	0.3669	0.03	0.61908	2.72554	0.222857	0.2617	0.024	0.35817	2014.8	164.742	2704.73	105.353	3256.97	298.69	1691.71	145.78	0.0591119	8.61735	0.34
BTW6b_4	17.29	0.68	0.4367	0.035	0.33284	2.2899	0.183528	0.2856	0.026	0.36976	2335.85	187.21	2951.06	116.063	3393.81	308.961	1954.87	170.598	0.0511542	8.72679	0.31
BTW6b_5	24.1	1	0.391	0.032	0.37804	2.55754	0.209313	0.448	0.044	-0.058564	2127.46	174.115	3272.45	135.786	4078.58	400.575	1301.97	153.323	0.0768068	11.7762	0.098
BTW6b_6	5.27	0.29	0.2939	0.024	0.58915	3.40252	0.277851	0.1287	0.012	-0.017618	1660.99	135.637	1864.02	102.574	2080.29	193.967	1610.97	129.587	0.0620744	8.04404	11
BTW6b_8	54.5	2.7	0.68	0.065	0.5461	1.47059	0.140571	0.586	0.057	0.19147	3344.36	319.681	4078.17	202.038	4473.66	435.152	1704.1	292.864	0.0586819	17.1858	0.089
BTW6b_9	8.37	0.38	0.3493	0.028	0.8284	2.86287	0.229489	0.174	0.019	-0.68455	1931.26	154.81	2271.93	103.146	2596.5	283.525	1808.72	148.034	0.0552877	8.18449	26
BTW6b_10	4.83	0.19	0.2634	0.021	0.7151	3.79651	0.302683	0.1319	0.012	0.047105	1507.21	120.165	1790.14	70.4195	2123.41	193.184	1442.41	112.9	0.0693284	7.82718	4600
BTW6b_12	27.4	5.9	0.468	0.059	0.97011	2.13675	0.269377	0.385	0.048	-0.87656	2474.78	311.992	3397.87	731.657	3851.51	480.188	1789.7	262.186	0.0558753	14.6497	5.9
BTW6b_13	10	0.63	0.3519	0.029	0.73297	2.84172	0.234185	0.2007	0.019	-0.18666	1943.66	160.177	2434.78	153.391	2831.9	268.092	1761.94	147.99	0.0567556	8.39923	3.3
BTW6b_14	13.08	0.47	0.327	0.027	0.6367	3.0581	0.252504	0.2865	0.026	0.56357	1823.82	150.591	2685.44	96.4952	3398.71	308.435	1451.35	128.226	0.0689013	8.83496	2.6
BTW6b_15	11.5	1	0.349	0.029	0.91751	2.86533	0.238093	0.231	0.023	-0.77382	1929.82	160.358	2564.58	223.007	3058.99	304.575	1678.74	144.954	0.0595685	8.6347	8.7
BTW6b_16	14.62	0.69	0.3998	0.032	0.64877	2.50125	0.2002	0.264	0.026	-0.66569	2168.12	173.536	2790.83	131.715	3270.74	322.118	1840.62	158.666	0.0543294	8.62021	3.4
BTW6b_17	4.23	0.18	0.0984	0.0082	0.77847	10.1626	0.846884	0.312	0.03	-0.21418	605.025	50.4188	1679.86	71.4835	3530.84	339.504	418.966	40.9165	0.238683	9.76606	3.3
BTW6b_18	34.5	1.5	0.5126	0.042	0.42747	1.95084	0.159842	0.4831	0.044	0.54	2667.72	218.58	3624.44	157.584	4190.45	381.66	1617.39	193.279	0.0618279	11.95	0.38
BTW6b_19	6.02	0.22	0.3163	0.026	0.43421	3.16156	0.259881	0.1365	0.012	0.48308	1771.63	145.629	1978.74	72.3128	2183.26	191.935	1715.3	139.492	0.0582988	8.13219	4.3
BTW6b_20	5.12	0.18	0.3069	0.025	0.4477	3.25839	0.265428	0.1201	0.011	0.30395	1725.43	140.553	1839.43	64.6674	1957.7	179.307	1697.35	136.315	0.0589154	8.03107	3.1
BTW6b_21	5.7	0.23	0.3077	0.025	0.63234	3.24992	0.264049	0.133	0.012	0.25601	1729.38	140.509	1931.37	77.9324	2137.95	192.898	1676.43	134.548	0.0596507	8.02588	2.7
BTW6b_22	9.79	0.54	0.294	0.024	0.65592	3.40136	0.277662	0.2451	0.024	-0.17447	1661.49	135.632	2415.21	133.219	3153.39	308.777	1386.67	118.53	0.0721154	8.54781	1.6
BTW6b_23	11.86	0.38	0.3328	0.028	0.48749	3.00481	0.252808	0.2596	0.024	0.4494	1851.94	155.812	2593.41	83.0941	3244.28	299.933	1537.53	135.325	0.0650395	8.80146	0.41
BTW6b_24	7.94	0.2	0.3183	0.027	0.56614	3.14169	0.266496	0.1818	0.018	0.17084	1781.42	151.11	2224.23	56.026	2669.36	264.293	1633.46	139.395	0.0612197	8.53372	5.4
BTW6b_25	9.11	0.26	0.3432	0.028	0.53826	2.91375	0.237719	0.1927	0.018	-0.021251	1902.05	155.179	2349.11	67.0439	2765.34	258.309	1736.13	143.59	0.0575993	8.27071	2.1
BTW6b_26	19.28	0.65	0.2279	0.019	0.41557	4.38789	0.365818	0.612	0.056	0.16014	1323.48	110.339	3055.93	103.027	4536.75	415.127	444.561	103.221	0.224941	23.2187	0.84
BTW6b_27	7.92	0.29	0.3149	0.025	0.62967	3.17561	0.252113	0.1813	0.017	0.21757	1764.77	140.106	2221.96	81.3596	2664.8	249.871	1617.23	129.178	0.0618342	7.98763	0.95
BTW6b_28	6.63	0.33	0.3257	0.026	0.69672	3.07031	0.245097	0.145	0.014	-0.34665	1817.51	145.088	2063.35	102.701	2287.78	220.889	1747.82	139.209	0.0572143	7.96476	2.6
BTW6b_29	5.77	0.27	0.2603	0.021	0.54756	3.84172	0.309935	0.1597	0.015	0.11136	1491.38	120.319	1941.92	90.8698	2452.49	230.353	1378.28	110.228	0.0725542	7.99752	12
BTW6b_30	49.4	1.9	0.577	0.048	0.6523	1.7331	0.144175	0.6	0.056	0.36518	2936.5	244.284	3980.29	153.088	4508	420.747	1325.1	238.465	0.0754663	17.9961	37
BTW6b_31	11.33	0.52	0.2877	0.024	0.22269	3.47584	0.289956	0.2834	0.026	0.2889	1630.03	135.977	2550.68	117.066	3381.76	310.253	1281.9	114.344	0.0780089	8.91983	0.14
BTW6b_32	3.84	0.16	0.2581	0.021	0.69344	3.87447	0.315241	0.1065	0.0096	0.038694	1480.11	120.428	1601.17	66.7155	1740.36	156.877	1456.93	115.596	0.0686377	7.93421	8.1
BTW6b_33	5.14	0.31	0.2883	0.024	0.7004	3.46861	0.28875	0.1265	0.012	-0.23614	1633.03	135.944	1842.74	111.138	2049.89	194.456	1585.09	129.787	0.0630878	8.188	2
BTW6b_34	28.9	1.1	0.524	0.043	0.55646	1.9084	0.156605	0.3951	0.036	0.51919	2716.12	222.888	3450.13	131.32	3890.54	354.491	1988.1	200.336	0.0502994	10.0768	0.06
BTW6b_36	27.4	4.1	0.489	0.057	0.95453	2.04499	0.238373	0.396	0.052	-0.85069	2566.35	299.145	3397.87	508.44	3893.96	511.328	1839.55	264.12	0.0543611	14.3578	0.31
BTW6b_37	6.9	0.24	0.3254	0.026	0.6234	3.07314	0.245549	0.1528	0.014	0.47664	1816.05	145.105	2098.66	72.9968	2377.5	217.834	1730.07	137.857	0.0578011	7.96828	0.26
BTW6b_38	5.67	0.21	0.2895	0.023	0.72212	3.45423	0.274429	0.1411	0.013	0.36028	1639.03	130.217	1926.81	71.3634	2240.75	206.448	1564.31	122.759	0.0639259	7.84749	0.4
BTW6b_39	7.33	0.28	0.3202	0.026	0.71063	3.12305	0.253589	0.1645	0.015	0.21455	1790.71	145.404	2152.47	82.2227	2502.45	228.187	1678.82	136.073	0.0595657	8.10526	0.57
BTW6b_40	22.2	1	0.455	0.037	0.46348	2.1978	0.178722	0.3488	0.032	0.32008	2417.44	196.583	3192.52	143.807	3701.76	339.611	1849.22	173.73	0.054077	9.39477	0.16
BTW6b_41	4.41	0.16	0.266	0.021	0.58866	3.7594	0.296795	0.1196	0.011	0.42575	1520.47	120.037	1714.22	62.1939	1950.25	179.371	1477.55	114.277	0.0676798	7.73421	0.31
BTW6b_42	2.027	0.082	0.113	0.0095	0.77571	8.84956	0.743989	0.1296	0.012	0.66762	690.147	58.0212	1124.61	45.4948	2092.55	193.754	634.988	52.8585	0.157483	8.32433	1.1
BTW6b_43	37.1	1.5	0.529	0.044	0.31415	1.89036	0.157232	0.507	0.047	0.43611	2737.24	227.672	3696.21	149.443	4261.69	395.068	1581.63	204.264	0.063226	12.9148	0.032
BTW6b_44	75.5	2.6	0.712	0.06	0.2577	1.40449	0.118356	0.771	0.073	0.3529	3465.99	292.078	4404.01	151.661	4869.09	461.016	552.986	388.839	0.180837	70.3163	0.011
BTW6b_45	5.26	0.19	0.2943	0.024	0.73348	3.39789	0.277096	0.1287	0.012	0.075536	1662.98	135.615	1862.4	67.2728	2080.29	193.967	1613.11	129.598	0.061992	8.03403	0.53
BTW6b_46	8.53	0.25	0.3453	0.028	0.51067	2.89603	0.234836	0.1764	0.016	0.26928	1912.12	155.051	2289.12	67.0904	2619.31	237.579	1782.82	145.623	0.056091	8.16813	0.32
BTW6b_47	6.92	0.26	0.325	0.026	0.44678	3.07692	0.246154	0.1532	0.014	0.11321	1814.1	145.128	2101.22	78.9478	2381.95	217.672	1727.14	137.77	0.057899	7.97674	0.82
BTW6b_48	8.23	0.3	0.3069	0.025	0.64865	3.25839	0.265428	0.1934	0.017	0.20707	1725.43	140.553	2256.65	82.2593	2771.29	243.599	1552.41	126.932	0.064416	8.17646	0.42
BTW6b_49	40.2	6.6	0.422	0.068	0.97454	2.36967	0.381842	0.669	0.068	-0.81117	2269.55	365.71	3775.64	619.881	4665.53	474.224	671.639	233.738	0.14889	34.8012	1
BTW6b_50	13.1	0.66	0.3918	0.032	0.53239	2.55232	0.208459	0.2402	0.022	0.024721	2131.17	174.062	2686.88	135.37	3121.3	285.881	1863.69	159.129	0.053657	8.53837	0.51
BTW6b_51	17.3	1.4	0.317	0.027	0.81799	3.15457	0.268686	0.386	0.037	-0.51151	1775.06	151.188	2951.62	238.859	3855.42	369.561	1186.24	125.229	0.0842996	10.5567	0.083
BTW6b_52	6.1	0.28	0.3022	0.025	0.71127	3.30907	0.273748	0.145	0.013	0.036317	1702.21	140.818	1990.25	91.3556	2287.78	205.111	1623.85	132.766	0.061582	8.17601	1.5
BTW6b_53	11.85	0.54	0.3237	0.026	0.53183	3.08928	0.248135	0.2676	0.026	-0.11042	1807.77	145.203	2592.62	118.145	3292.02	319.852	1477.88	126.978	0.0676644	8.59191	0.18
BTW6b_54	7.23	0.31	0.3058	0.025	0.52541	3.27011	0.267341	0.1703	0.016	0.26358	1720.01	140.615	2140.21	91.7656	2560.59	240.572	1592.93	130.066	0.0627775	8.16519	1.6
BTW6b_55	5.57	0.22	0.2637	0.021	0.57079	3.79219	0.301994	0.1522	0.014	0.29901	1508.74	120.15	1911.47	75.498	2370.79	218.075	1408.91	110.892	0.0709768	7.87079	2.1
BTW6b_56	26.5	2.9	0.498	0.047	0.9671	2.00803	0.189513	0.372	0.037	-0.80013	2605.2	245.872	3365.17	368.264	3799.58	377.916	1959.07	216.327	0.0510446	11.0423	0.11
BTW6b_57	6.28	0.27	0.3315	0.027	0.58093	3.01659	0.245695	0.1366	0.013	0.31633	1845.65	150.324	2015.67	86.6609	2184.53	207.899	1796.12	145.75	0.0556757	8.11471	3.2
BTW6b_58	6.43	0.17	0.3147	0.025	0.4914	3.17763	0.252433	0.1486	0.015	-0.12052	1763.79	140.117	2036.38	53.8389	2329.88	235.183	1682.49	133.449	0.0594357	7.93164	1.4
BTW6b_59	107.4	6.2	0.977	0.085	0.91231	1.02354	0.0890491	0.786	0.072	0.11059	4393.75	382.261	4757.91	274.665	4896.58	448.541	720.939	512.272	0.138708	71.0561	0.1
BTW6b_60	59.2	4.1	0.701	0.068	0.72491	1.42653	0.13838	0.586	0.059	-0.040095	3424.44	332.185	4160.71	288.157	4473.66	450.42	1771.49	310.628	0.0564497	17.5348	0.024
BTW6b_61	15.4	1.1	0.393	0.033	0.89724	2.54453	0.213663	0.2799	0.026	-0.46063	2136.73	179.42	2840.31	202.879	3362.37	312.332	1767.4	158.717	0.0565804	8.98026	0.16
BTW6b_62	31.9	7.1	0.401	0.049	0.98232	2.49377	0.304725	0.51	0.051	-0.7969	2173.64	265.607	3547.21	789.505	4270.38	427.038	1152.11	193.548	0.0867971	16.7994	0.17
BTW6b_63	21.26	0.71	0.4026	0.033	0.78651	2.48385	0.203595	0.387	0.036	-0.44289	2181	178.771	3150.52	105.215	3859.32	359.007	1518.95	152.491	0.0658351	10.0393	0.32
BTW6b_64	13	0.44	0.3543	0.029	0.56407	2.82247	0.231023	0.2671	0.025	0.037077	1955.1	160.028	2679.65	90.696	3289.08	307.851	1620.14	140.567	0.061723	8.67624	0.21
BTW6b_65	84.7	5.7	0.95	0.088	0.88039	1.05263	0.0975069	0.641	0.059	-0.2342	4305.1	398.789	4519.32	304.134	4603.8	423.751	2217.12	408.917	0.0451035	18.4436	0.12
BTW6b_66	9.21	0.27	0.3261	0.027	0.30564	3.06654	0.2539	0.2047	0.019	0.41719	1819.45	150.644	2359.11	69.1595	2864.04	265.837	1624.64	136.409	0.0615522	8.39628	0.22
BTW6b_67	6.75	0.34	0.3225	0.026	0.7265	3.10078	0.249985	0.1502	0.014	-0.18939	1801.93	145.272	2079.19	104.73	2348.2	218.874	1720.22	138.169	0.058132	8.03204	3.3
BTW6b_68	35.4	1.6	0.537	0.045	0.46287	1.8622	0.15605	0.47	0.045	0.094686	2770.88	232.196	3649.86	164.966	4149.76	397.318	1756.6	209.773	0.0569282	11.942	0.057
BTW6b_69	52	5.5	0.692	0.065	0.95935	1.44509	0.135738	0.522	0.05	-0.54754	3390.24	318.448	4031.37	426.395	4304.57	412.315	2096.86	292.724	0.0476903	13.9601	0.037
BTW6b_70	12.76	0.54	0.3658	0.031	0.56969	2.73373	0.231672	0.255	0.027	-0.24068	2009.61	170.306	2662.1	112.659	3216.08	340.526	1702.71	153.834	0.0587299	9.03464	0.76
BTW6b_71	3.78	0.12	0.2589	0.021	0.36177	3.8625	0.313296	0.1047	0.0094	0.24356	1484.21	120.388	1588.51	50.4288	1709.05	153.439	1464.32	115.796	0.0682911	7.90786	5.6
BTW6b_72	5.93	0.24	0.2926	0.024	0.19427	3.41763	0.280326	0.1465	0.014	0.52842	1654.51	135.708	1965.64	79.5537	2305.47	220.318	1570.49	127.513	0.0636746	8.11935	2.6
BTW6b_74	44.3	4.8	0.624	0.061	0.94214	1.60256	0.156661	0.498	0.048	-0.64159	3125.82	305.569	3871.97	419.536	4235.3	408.222	1960.69	266.717	0.0510025	13.6032	0.085
BTW6b_75	6.86	0.32	0.3407	0.028	0.58995	2.93513	0.24122	0.1392	0.013	0.0096647	1890.04	155.33	2093.5	97.6561	2217.28	207.073	1839.7	151	0.0543566	8.20787	3.8
BTW6b_76	10.58	0.61	0.3508	0.029	0.85719	2.85063	0.235656	0.2158	0.02	-0.40391	1938.42	160.245	2486.96	143.388	2949.61	273.365	1722.17	145.717	0.0580662	8.46123	1.1
BTW6b_77	4.31	0.24	0.2692	0.022	0.74006	3.71471	0.30358	0.1149	0.011	-0.30471	1536.74	125.588	1695.28	94.4005	1878.32	179.821	1502.99	120.273	0.0665338	8.00221	1.2
BTW6b_78	5.38	0.23	0.2973	0.024	0.70439	3.36361	0.271532	0.1309	0.012	-0.07122	1677.91	135.452	1881.68	80.4434	2110.07	193.437	1624.98	129.338	0.0615393	7.9594	2
BTW6b_79	5.31	0.15	0.2989	0.024	0.66442	3.3456	0.268633	0.1272	0.012	0.32082	1685.85	135.364	1870.47	52.8382	2059.63	194.305	1640.59	129.96	0.0609535	7.92154	0.85
BTW6b_80	6.38	0.23	0.3033	0.025	0.52281	3.29707	0.271766	0.1443	0.013	0.18457	1707.65	140.756	2029.52	73.1645	2279.45	205.356	1631.01	132.914	0.0613118	8.14922	1.3
BTW6b_81	8.48	0.45	0.3241	0.027	0.71826	3.08547	0.257043	0.1881	0.017	0.081532	1809.72	150.764	2283.78	121.191	2725.62	246.335	1649.71	138.055	0.0606168	8.36844	1.8
BTW6b_82	16.5	1.6	0.364	0.031	0.84274	2.74725	0.233969	0.319	0.034	-0.72512	2001.11	170.424	2906.23	281.816	3565.02	379.971	1538.33	149.711	0.0650056	9.73206	0.92
BTW6b_83	6.27	0.23	0.2945	0.024	0.73534	3.39559	0.27672	0.1538	0.014	0.44202	1663.98	135.604	2014.27	73.8888	2388.61	217.429	1566.57	126.446	0.0638337	8.07153	0.71
BTW6b_84	6.31	0.23	0.3139	0.025	0.56287	3.18573	0.253722	0.1448	0.013	0.31781	1759.87	140.162	2019.84	73.6235	2285.4	205.181	1685.91	133.204	0.059315	7.90102	1.3
BTW6b_85	16.4	1	0.3893	0.032	0.79201	2.56871	0.211145	0.3015	0.028	-0.28128	2119.58	174.227	2900.41	176.854	3477.95	322.993	1694.37	152.216	0.0590189	8.98362	0.38
BTW6b_86	7.15	0.68	0.2899	0.025	0.66826	3.44947	0.29747	0.1762	0.019	-0.31334	1641.03	141.517	2130.29	202.601	2617.42	282.242	1500.25	130.017	0.0666557	8.66636	0.82
BTW6b_87	4.66	0.17	0.2886	0.024	0.77114	3.465	0.28815	0.1156	0.01	0.48762	1634.53	135.928	1760.09	64.2093	1889.26	163.43	1606.86	130.914	0.0622332	8.14719	2.5
BTW6b_88	5.96	0.42	0.2887	0.024	0.88469	3.4638	0.28795	0.1481	0.014	-0.58274	1635.03	135.922	1970.03	138.827	2324.1	219.699	1547.01	127.162	0.0646408	8.21987	3.8
BTW6b_90	7.72	0.33	0.3398	0.028	0.55783	2.94291	0.2425	0.1636	0.015	0.0057698	1885.71	155.385	2198.93	93.9958	2493.21	228.595	1782.36	147.196	0.0561053	8.25847	0.97
BTW6b_91	5.8	0.17	0.3099	0.025	0.33211	3.22685	0.260314	0.1351	0.012	0.52833	1740.21	140.385	1946.41	57.05	2165.3	192.329	1684.02	134.281	0.0593817	7.97383	0.72
BTW6b_92	12.65	0.44	0.3611	0.029	0.47878	2.76932	0.222404	0.2535	0.023	0.4529	1987.39	159.607	2653.95	92.3112	3206.76	290.948	1684.12	141.78	0.0593784	8.41868	0.17
BTW6b_93	4.95	0.23	0.2154	0.018	0.29117	4.64253	0.387955	0.1658	0.016	0.21027	1257.52	105.085	1810.83	84.1394	2515.69	242.768	1136.83	94.4203	0.0879642	8.30561	0.72
BTW6b_94	5.75	0.25	0.3034	0.025	0.53679	3.29598	0.271587	0.1366	0.013	0.43895	1708.15	140.75	1938.92	84.3007	2184.53	207.899	1646.51	134.166	0.0607346	8.14854	1.5
BTW6b_95	22.55	0.94	0.525	0.047	0.49464	1.90476	0.170521	0.322	0.031	-0.08087	2720.35	243.536	3207.72	133.714	3579.41	344.602	2253.78	230.371	0.0443699	10.2215	0.043
BTW6b_96	4.37	0.15	0.2822	0.023	0.33927	3.54359	0.288811	0.1119	0.01	0.34432	1602.43	130.602	1706.68	58.5818	1830.5	163.584	1578.88	125.992	0.063336	7.97984	5.3
BTW6b_98	25.7	1.8	0.432	0.041	0.87812	2.31481	0.219693	0.444	0.044	-0.12126	2314.73	219.685	3335.19	233.593	4065.23	402.861	1461.85	182.184	0.0684062	12.4625	0.02
BTW6b_99	9.4	0.46	0.3354	0.028	0.6693	2.98151	0.248904	0.2017	0.019	0.089119	1864.5	155.653	2377.83	116.362	2840	267.526	1677.3	142.092	0.0596197	8.47147	0.43
BTW6b_100	5.13	0.21	0.2879	0.024	0.6801	3.47343	0.289553	0.1294	0.013	-0.057487	1631.03	135.966	1841.09	75.3661	2089.83	209.952	1577.58	129.656	0.0633882	8.21869	1.4
BTW6b_101	22.8	1	0.4168	0.035	0.64728	2.39923	0.201471	0.395	0.037	0.35071	2245.94	188.598	3218.45	141.16	3890.15	364.394	1552.26	160.522	0.0644224	10.3412	0.11
BTW6b_102	8.76	0.31	0.3159	0.026	0.4103	3.16556	0.26054	0.2011	0.019	0.48077	1769.68	145.652	2313.34	81.8648	2835.14	267.865	1581.58	131.868	0.0632278	8.33775	0.18
BTW6b_103	5.24	0.24	0.2996	0.024	0.52508	3.33778	0.267379	0.1248	0.011	0.077404	1689.32	135.326	1859.15	85.1517	2025.96	178.57	1648.94	130.036	0.0606451	7.88602	2.5
BTW6b_104	6.8	0.28	0.3041	0.025	0.59705	3.28839	0.270338	0.1606	0.015	0.11803	1711.61	140.711	2085.72	85.8827	2461.99	229.949	1603.31	131.107	0.0623711	8.17727	1.3
BTW6b_105	26.1	1.4	0.413	0.035	0.54475	2.42131	0.205196	0.45	0.043	0.34845	2228.62	188.866	3350.29	179.709	4085.21	390.364	1374.65	161.857	0.0727457	11.7744	0.024
BTW6b_106	6.68	0.25	0.3089	0.025	0.70875	3.23729	0.262002	0.1552	0.014	0.56034	1735.29	140.441	2069.98	77.4693	2404.02	216.858	1638.93	131.726	0.0610155	8.03733	0.62
BTW6b_107	7.09	0.25	0.2949	0.024	0.77465	3.39098	0.27597	0.1737	0.016	0.54118	1665.97	135.582	2122.79	74.8515	2593.62	238.905	1530.51	124.274	0.0653377	8.1198	0.49
BTW6b_108	5.07	0.25	0.2111	0.017	0.71964	4.73709	0.381481	0.1723	0.016	-0.36545	1234.68	99.4291	1831.1	90.2909	2580.11	239.592	1105.26	88.7599	0.0904761	8.03065	2.1
BTW6b_109	18.81	0.9	0.356	0.03	0.20353	2.80899	0.236712	0.384	0.038	0.39901	1963.19	165.437	3032.12	145.078	3847.58	380.75	1342.87	140.813	0.0744673	10.486	0.017
BTW6b_110	2.55	0.12	0.0833	0.0068	0.73604	12.0048	0.979984	0.2203	0.021	-0.075649	515.79	42.1053	1286.44	60.5382	2982.89	284.342	413.659	35.6788	0.241745	8.62517	1.7
BTW6b_111	5.97	0.21	0.2887	0.023	0.49416	3.4638	0.275952	0.1499	0.014	0.63997	1635.03	130.259	1971.48	69.3487	2344.79	218.993	1543.64	121.825	0.0647818	7.89206	0.5
BTW6b_112	10.9	0.48	0.2681	0.022	0.80181	3.72995	0.306076	0.295	0.029	-0.39478	1531.15	125.645	2514.64	110.736	3444.16	338.579	1172.74	106.427	0.08527	9.07505	0.081
BTW6b_113	7.32	0.24	0.2983	0.024	0.58472	3.35233	0.269715	0.1773	0.016	0.372	1682.87	135.397	2151.25	70.5329	2627.78	237.137	1540.87	123.839	0.0648986	8.03698	1.1
BTW6b_114	5.26	0.23	0.2978	0.024	0.83734	3.35796	0.270621	0.1273	0.011	0.18087	1680.39	135.424	1862.4	81.4355	2061.02	178.093	1634.51	129.595	0.0611805	7.92869	3
BTW6b_115	15.39	0.77	0.386	0.032	0.64289	2.59067	0.214771	0.2873	0.027	0.40992	2104.25	174.446	2839.69	142.077	3403.06	319.814	1716.16	153.566	0.0582696	8.94825	0.28
BTW6b_116	31.8	1.9	0.449	0.038	0.53309	2.22717	0.188491	0.506	0.05	0.40058	2390.81	202.34	3544.12	211.756	4258.78	420.828	1318.54	183.197	0.0758415	13.894	0.076
BTW6b_117	7.42	0.44	0.2856	0.023	0.61182	3.5014	0.281975	0.1809	0.017	-0.012717	1619.5	130.422	2163.39	128.287	2661.14	250.079	1469.55	118.563	0.0680481	8.06801	0.57
BTW6b_118	6.65	0.17	0.2948	0.024	0.51693	3.39213	0.276157	0.1591	0.015	0.65209	1665.47	135.588	2066.01	52.8152	2446.12	230.621	1558.01	126.052	0.0641845	8.09057	0.55
BTW6b_119	4.79	0.2	0.2935	0.024	0.74178	3.40716	0.278609	0.117	0.011	0.12587	1659	135.659	1783.15	74.4529	1910.89	179.657	1630.8	131.088	0.0613198	8.03827	3.9
BTW6b_120	5.12	0.15	0.3017	0.024	0.7164	3.31455	0.26367	0.1236	0.011	0.3915	1699.73	135.212	1839.43	53.8895	2008.83	178.78	1662.53	130.285	0.0601492	7.83652	0.85
BTW6b_121	3.93	0.14	0.2498	0.021	0.76253	4.0032	0.336538	0.1149	0.01	0.32239	1437.44	120.842	1619.88	57.7057	1878.32	163.474	1397.84	114.52	0.0715391	8.19268	1.5
BTW6b_122	11.16	0.73	0.3503	0.029	0.79428	2.8547	0.236329	0.2278	0.022	-0.28765	1936.03	160.277	2536.58	165.923	3036.66	293.268	1692.35	144.874	0.0590896	8.56051	1
Sample 4		Location: Bunatrahir West			Grid Coordinates: 54°18'31.6''N, -9°23'35.6''W
Apatite	207U/235Pb	2σ	206U/238Pb	2σ	ρ	238U/206Pb	2σ	207Pb/206Pb	2σ	ρ	206Pb/238U (Ma)	2σ (Ma)	207Pb/235U (Ma)	2σ (Ma)	207Pb/206Pb (Ma)	2σ (Ma)	207Pb corrected Age (Ma)	2σ (Ma)		% age error	U (ppm)	% error
BTW08_1	7.58	0.48	0.2883	0.016	0.77918	3.46861	0.1925	0.1898	0.0047	-0.18639	1633.03	90.6294	2182.5	138.206	2740.43	67.861	1466.32	79.1169	0.0681978	5.3956	2.1	5.3956
BTW08_2	30.86	1.8	0.51	0.029	0.52579	1.96078	0.111496	0.438	0.01	0.38627	2656.63	151.063	3514.6	204.999	4044.96	92.3506	1775.37	104.463	0.0563264	5.88404	0.077	5.88404
BTW08_3	5.3	0.3	0.2456	0.014	0.44331	4.07166	0.232098	0.156	0.0036	0.50267	1415.74	80.702	1868.86	105.785	2412.76	55.6791	1308.28	72.1066	0.076436	5.51154	0.99	5.51154
BTW08_5	18.17	1.1	0.3979	0.022	0.28203	2.51319	0.138955	0.332	0.0087	0.31493	2159.36	119.392	2998.78	181.544	3626.34	95.0276	1651.28	91.6284	0.0605589	5.54892	0.26	5.54892
BTW08_6	18.4	3.4	0.344	0.034	0.97798	2.90698	0.287318	0.358	0.019	-0.75016	1905.88	188.372	3010.89	556.36	3741.39	198.565	1358.94	136.541	0.0735868	10.0476	6	10.0476
BTW08_7	51.1	6.7	0.625	0.069	0.91825	1.6	0.17664	0.608	0.035	-0.11692	3129.78	345.528	4013.98	526.294	4527.23	260.614	1419.65	208.895	0.0704398	14.7145	0.029	14.7145
BTW08_8	12.43	0.78	0.3377	0.018	0.22257	2.96121	0.157838	0.2696	0.0097	0.21628	1875.6	99.9725	2637.45	165.504	3303.7	118.865	1537.78	82.1657	0.0650289	5.34315	0.29	5.34315
BTW08_9	5.27	0.29	0.2839	0.015	0.50506	3.52237	0.186106	0.1348	0.0024	0.16852	1610.97	85.1166	1864.02	102.574	2161.43	38.4824	1546.31	79.2089	0.06467	5.12244	1.5	5.12244
BTW08_10	4.37	0.38	0.1018	0.006	0.80581	9.82318	0.57897	0.315	0.016	-0.49576	624.949	36.8339	1706.68	148.407	3545.59	180.094	431.055	27.8456	0.231989	6.45988	1.8	6.45988
BTW08_11	19.2	1.1	0.4201	0.023	0.48541	2.38039	0.130323	0.3315	0.0069	0.41549	2260.93	123.784	3051.92	174.85	3624.03	75.4323	1748.91	95.482	0.0571785	5.45951	0.47	5.45951
BTW08_12	13.53	0.8	0.3513	0.019	0.35696	2.84657	0.153956	0.2813	0.0071	0.32716	1940.8	104.968	2717.38	160.673	3370.16	85.0627	1572.95	84.0743	0.0635748	5.345	0.17	5.345
BTW08_13	15.12	0.97	0.3765	0.021	0.39267	2.65604	0.148146	0.2872	0.0074	-0.098358	2059.91	114.896	2822.83	181.094	3402.51	87.6692	1673.15	92.6004	0.0597676	5.5345	0.34	5.5345
BTW08_14	5.51	0.32	0.3045	0.017	0.51894	3.28407	0.183347	0.1313	0.003	0.22077	1713.58	95.6681	1902.16	110.47	2115.42	48.3341	1662.66	90.4304	0.0601445	5.43889	2.4	5.43889
BTW08_15	6.53	0.37	0.2977	0.016	0.49106	3.35909	0.180535	0.1582	0.003	0.30614	1679.89	90.2865	2049.95	116.153	2436.51	46.2044	1574.78	82.2114	0.0635008	5.22049	1.9	5.22049
BTW08_16	4.825	0.26	0.2948	0.016	0.66731	3.39213	0.184105	0.1186	0.0014	0.38727	1665.47	90.3919	1789.27	96.4164	1935.24	22.8443	1634.82	86.1994	0.0611686	5.2727	7	5.2727
BTW08_17	20.41	1.2	0.3314	0.018	0.27924	3.0175	0.163896	0.444	0.01	0.36112	1845.16	100.22	3110.99	182.91	4065.23	91.5592	1102.39	62.5495	0.0907117	5.67397	0.26	5.67397
BTW08_18	117	21	1.17	0.17	0.92415	0.854701	0.124187	0.685	0.037	-0.53315	4994.21	725.655	4844.07	869.449	4699.57	253.845	2577.14	499.239	0.0388027	19.3719	0.22	19.3719
BTW08_19	6.39	0.39	0.3002	0.017	0.58105	3.33111	0.188637	0.1528	0.004	0.19415	1692.3	95.8331	2030.9	123.951	2377.5	62.2382	1598.24	88.1025	0.062569	5.51249	1.5	5.51249
BTW08_20	47.3	2.8	0.471	0.027	0.57	2.12314	0.121709	0.726	0.018	0.35425	2487.94	142.621	3937.08	233.062	4783.06	118.588	520.456	73.7847	0.192139	14.1769	0.1	14.1769
BTW08_21	5.94	0.34	0.2647	0.015	0.477	3.77786	0.214084	0.164	0.0038	0.40624	1513.84	85.7864	1967.1	112.595	2497.32	57.8648	1393.53	76.4658	0.0717604	5.48721	1.2	5.48721
BTW08_22	6.39	0.4	0.3053	0.017	0.64596	3.27547	0.182388	0.1557	0.0044	0.026982	1717.54	95.6375	2030.9	127.13	2409.49	68.0909	1619.18	87.92	0.0617598	5.42992	0.75	5.42992
BTW08_23	5.22	0.53	0.1079	0.0071	0.89383	9.26784	0.609839	0.357	0.023	-0.55185	660.54	43.4647	1855.89	188.433	3737.14	240.768	421.962	33.1599	0.236988	7.85851	4.9	7.85851
BTW08_24	5.85	0.33	0.3129	0.017	0.75471	3.19591	0.173635	0.137	0.0018	0.03034	1754.96	95.3479	1953.85	110.217	2189.62	28.7687	1696.21	89.8035	0.0589549	5.29435	0.81	5.29435
BTW08_25	17	1.2	0.3752	0.021	0.64677	2.66525	0.149174	0.328	0.011	-0.19853	2053.82	114.953	2934.83	207.165	3607.76	120.992	1564.05	89.018	0.0639366	5.69151	0.15	5.69151
BTW08_26	5.23	0.29	0.303	0.017	0.60291	3.30033	0.185167	0.1255	0.0024	0.37564	1706.17	95.7256	1857.52	102.998	2035.86	38.9328	1665.86	90.9947	0.060029	5.46232	1.8
BTW08_27	10.28	0.63	0.31	0.018	0.67768	3.22581	0.187305	0.2378	0.0052	0.042094	1740.71	101.073	2460.3	150.777	3105.31	67.9041	1477.07	83.5768	0.0677015	5.65828	0.57	5.65828
BTW08_28	13.25	0.82	0.3622	0.021	0.59649	2.76091	0.160075	0.2737	0.0078	0.22511	1992.59	115.529	2697.63	166.947	3327.35	94.824	1640.91	94.2377	0.0609418	5.74301	0.17	5.74301
BTW08_29	103.6	6.6	1.132	0.072	0.41477	0.883392	0.0561875	0.664	0.02	0.20323	4880.33	310.409	4721.68	300.802	4654.71	140.202	2700.16	249.823	0.0370349	9.25216	0.026	9.25216
BTW08_30	6.03	0.36	0.1209	0.0067	0.48163	8.2713	0.458376	0.3605	0.0091	0.2972	735.742	40.7731	1980.19	118.22	3751.96	94.7097	469.673	26.9291	0.212914	5.73359	0.56	5.73359
BTW08_31	49.7	5.4	0.682	0.054	0.91502	1.46628	0.116098	0.519	0.018	-0.45857	3352.03	265.41	3986.32	433.121	4296.1	148.998	2074.89	182.4	0.0481954	8.79084	0.019	8.79084
BTW08_32	10.33	0.59	0.3475	0.019	0.42598	2.8777	0.157342	0.2176	0.0056	0.22653	1922.65	105.123	2464.8	140.777	2963.02	76.2541	1701.87	91.5004	0.0587589	5.37646	1	5.37646
BTW08_33	10.85	0.94	0.3705	0.021	0.82459	2.69906	0.152983	0.213	0.011	-0.60402	2031.75	115.16	2510.36	217.487	2928.51	151.238	1826.11	104.718	0.0547612	5.73446	0.72	5.73446
BTW08_34	10.16	0.6	0.2255	0.013	0.48146	4.43459	0.255653	0.3238	0.0083	0.32838	1310.87	75.5713	2449.45	144.652	3587.98	91.971	939.674	54.0516	0.10642	5.75216	0.18	5.75216
BTW08_35	7.33	0.43	0.2579	0.015	0.54963	3.87747	0.225522	0.2072	0.0051	0.2322	1479.09	86.0269	2152.47	126.271	2883.77	70.9808	1283.9	72.5009	0.0778875	5.64691	0.22	5.64691
BTW08_36	4.802	0.27	0.2794	0.016	0.53346	3.5791	0.204959	0.1256	0.0025	0.57478	1588.34	90.9572	1785.25	100.378	2037.27	40.5508	1539.02	85.4122	0.0649763	5.54977	3.4	5.54977
BTW08_37	5.477	0.29	0.2908	0.016	0.5024	3.43879	0.189204	0.1356	0.002	0.47842	1645.53	90.5379	1897	100.444	2171.74	32.0316	1581.49	84.4106	0.0632317	5.33742	1.2	5.33742
BTW08_38	19.91	1.3	0.4168	0.023	0.44007	2.39923	0.132395	0.35	0.012	0.01239	2245.94	123.936	3087	201.562	3707	127.097	1682.15	95.9889	0.0594478	5.70633	0.18	5.70633
BTW08_40	6.18	0.35	0.2877	0.016	0.69761	3.47584	0.193304	0.1555	0.0026	0.09242	1630.03	90.6514	2001.62	113.361	2407.31	40.2508	1527.95	82.3585	0.0654473	5.39014	1.3	5.39014
BTW08_41	20.46	1.2	0.4038	0.023	0.49501	2.47647	0.141057	0.3647	0.0079	0.45246	2186.51	124.541	3113.36	182.602	3769.55	81.6545	1586.38	90.2443	0.0630365	5.68868	0.053	5.68868
BTW08_42	5.92	0.33	0.2864	0.016	0.32753	3.49162	0.195063	0.1495	0.0038	0.42394	1623.51	90.6991	1964.17	109.489	2340.22	59.4837	1532.35	83.1323	0.0652592	5.42514	0.71	5.42514
BTW08_43	6.13	0.34	0.3218	0.018	0.54067	3.10752	0.17382	0.1379	0.0027	0.41237	1798.51	100.601	1994.53	110.626	2201	43.0942	1741.73	95.2395	0.0574141	5.46809	0.6	5.46809
BTW08_44	13.02	0.73	0.1821	0.01	0.46571	5.49149	0.301564	0.519	0.011	0.49386	1078.44	59.2222	2681.1	150.323	4296.1	91.0541	486.882	30.867	0.205388	6.33971	0.29	6.33971
BTW08_45	21.5	1.6	0.367	0.022	0.63362	2.7248	0.163339	0.433	0.018	-0.052464	2015.27	120.806	3161.41	235.268	4027.83	167.439	1257.27	85.3002	0.0795376	6.78457	0.21	6.78457
BTW08_47	5.39	0.3	0.2803	0.016	0.28167	3.56761	0.203645	0.1403	0.0033	0.41427	1592.87	90.9239	1883.27	104.82	2230.91	52.4734	1517.19	83.9758	0.0659112	5.53495	0.5	5.53495
BTW08_48	30.3	5	0.497	0.058	0.91628	2.01207	0.234809	0.413	0.035	-0.36986	2600.89	303.524	3496.59	576.995	3957.09	335.347	1813.39	234.579	0.0551455	12.936	0.032	12.936
BTW08_50	11.96	0.83	0.3492	0.02	0.79659	2.86369	0.164014	0.2505	0.0082	-0.35646	1930.78	110.583	2601.28	180.523	3187.93	104.355	1634.96	92.8072	0.0611635	5.67641	0.51	5.67641
BTW08_51	6.22	0.35	0.2867	0.016	0.23129	3.48797	0.194655	0.1582	0.0045	0.64157	1625.02	90.6881	2007.27	112.949	2436.51	69.3066	1517.71	82.3482	0.0658889	5.42583	1.2	5.42583
BTW08_52	6.82	0.37	0.3318	0.018	0.55468	3.01386	0.163501	0.1491	0.003	0.37105	1847.1	100.204	2088.32	113.296	2335.63	46.9946	1771.45	94.1556	0.056451	5.31518	1.2	5.31518
BTW08_53	9.77	0.59	0.3379	0.02	0.39453	2.95946	0.175168	0.2138	0.0072	0.35207	1876.56	111.072	2413.33	145.738	2934.57	98.8256	1663.19	96.9783	0.0601254	5.83086	0.45	5.83086
BTW08_54	41.4	3	0.603	0.043	0.89496	1.65837	0.118259	0.51	0.012	-0.17198	3041.91	216.919	3804.79	275.709	4270.38	100.479	1827.97	136.732	0.0547055	7.48001	0.075	7.48001
BTW08_55	7.52	0.53	0.1276	0.0076	0.72874	7.83699	0.46678	0.424	0.014	-0.17024	774.159	46.1098	2175.37	153.318	3996.45	131.958	433.202	28.8978	0.230839	6.67076	1.1	6.67076
BTW08_56	4.718	0.25	0.2869	0.015	0.35702	3.48554	0.182234	0.1193	0.0017	0.25218	1626.02	85.0132	1770.44	93.8131	1945.77	27.7268	1590.85	80.6915	0.0628595	5.07223	8.8	5.07223
BTW08_57	5.24	0.35	0.109	0.0063	0.9219	9.17431	0.530258	0.349	0.011	-0.57296	666.938	38.5478	1859.15	124.18	3702.64	116.702	433.001	26.263	0.230946	6.06535	1.7	6.06535
BTW08_58	5.99	0.39	0.1138	0.0065	0.64901	8.78735	0.501913	0.378	0.011	-0.059366	694.779	39.6842	1974.39	128.55	3823.79	111.274	426.627	25.8554	0.234397	6.06041	2.1	6.06041
BTW08_59	4.361	0.24	0.2748	0.015	0.4885	3.63901	0.198636	0.1156	0.0017	0.42015	1565.12	85.4323	1704.98	93.8306	1889.26	27.7832	1532.1	80.9747	0.0652697	5.28519	5.4	5.28519
BTW08_60	7.25	0.41	0.2797	0.015	0.51438	3.57526	0.191737	0.1884	0.0034	0.20254	1589.85	85.262	2142.67	121.172	2728.24	49.2358	1425.83	74.0823	0.0701346	5.19573	1.6	5.19573
BTW08_61	12.71	0.74	0.3619	0.02	0.36407	2.76319	0.152705	0.256	0.0069	0.21455	1991.17	110.04	2658.4	154.777	3222.26	86.8499	1681.93	91.8974	0.0594554	5.4638	0.38	5.4638
BTW08_62	15.23	1	0.3321	0.019	0.67435	3.01114	0.172272	0.348	0.014	-0.06043	1848.55	105.759	2829.73	185.8	3698.27	148.781	1333.84	79.8809	0.0749718	5.98881	0.14	5.98881
BTW08_63	7.02	0.38	0.3034	0.016	0.48828	3.29598	0.173816	0.168	0.0027	0.25101	1708.15	90.0802	2113.96	114.431	2537.82	40.7863	1585.15	81.2033	0.0630857	5.12277	2.5	5.12277
BTW08_64	6.23	0.38	0.2844	0.016	0.57449	3.51617	0.197816	0.1597	0.004	0.022951	1613.48	90.7727	2008.67	122.519	2452.49	61.4273	1502.99	82.087	0.0665338	5.46156	4.6	5.46156
BTW08_65	47.5	3.2	0.612	0.037	0.59387	1.63399	0.0987868	0.555	0.02	0.18517	3078.01	186.089	3941.27	265.517	4394.39	158.356	1647.2	125.67	0.060709	7.62928	0.09	7.62928
BTW08_66	24	2.8	0.382	0.028	0.97477	2.6178	0.191881	0.442	0.021	-0.76313	2085.62	152.873	3268.39	381.312	4058.51	192.825	1286.76	105.653	0.0777146	8.21074	0.24	8.21074
BTW08_67	7.89	0.49	0.3529	0.02	0.86838	2.83366	0.160593	0.1636	0.0036	-0.23971	1948.43	110.424	2218.54	137.78	2493.21	54.8628	1850.6	103.354	0.0540364	5.58485	1.2	5.58485
BTW08_69	10.14	0.6	0.3268	0.018	0.52696	3.05998	0.168542	0.2237	0.0051	0.10219	1822.85	100.402	2447.62	144.83	3007.51	68.5665	1587.45	85.467	0.062994	5.38391	1.6	5.38391
BTW08_70	6.31	0.35	0.3112	0.017	0.27519	3.21337	0.175537	0.1476	0.0028	0.44973	1746.61	95.4125	2019.84	112.036	2318.31	43.9787	1666.1	88.6731	0.0600206	5.32221	1	5.32221
BTW08_71	4.75	0.27	0.277	0.015	0.5754	3.61011	0.195493	0.1243	0.0024	0.10481	1576.24	85.3557	1776.11	100.958	2018.85	38.9802	1528.48	80.1929	0.0654245	5.24658	2.4	5.24658
BTW08_73	17.8	1.2	0.404	0.024	0.66635	2.47525	0.147044	0.325	0.012	-0.1467	2187.43	129.946	2978.99	200.831	3593.66	132.689	1696.76	103.018	0.0589358	6.07144	0.29	6.07144
BTW08_74	104.3	7.1	1.11	0.069	0.75606	0.900901	0.056002	0.675	0.02	0.086596	4813.46	299.215	4728.45	321.879	4678.39	138.619	2462.04	220.031	0.0406168	8.93695	0.063	8.93695
BTW08_76	14.38	0.85	0.3604	0.02	0.45779	2.77469	0.153979	0.2888	0.0074	0.27034	1984.07	110.104	2775.11	164.036	3411.16	87.4051	1596.28	87.6955	0.0626457	5.49374	0.56	5.49374
BTW08_77	20.3	2.6	0.373	0.034	0.84829	2.68097	0.244377	0.418	0.033	-0.11193	2043.5	186.271	3105.76	397.782	3975.12	313.825	1319.49	141.667	0.0757868	10.7365	0.02	10.7365
BTW08_78	6.83	0.4	0.3195	0.018	0.61762	3.12989	0.176332	0.1529	0.0038	0.086241	1787.29	100.692	2089.62	122.379	2378.61	59.1153	1698.95	93.5301	0.0588598	5.50517	2.1	5.50517
BTW08_79	5.8	0.34	0.295	0.016	0.33706	3.38983	0.183855	0.1393	0.0035	0.3994	1666.47	90.3847	1946.41	114.1	2218.52	55.7418	1596.78	84.2362	0.062626	5.27538	1.1	5.27538
BTW08_80	17.9	1.7	0.225	0.02	0.9407	4.44444	0.395062	0.582	0.015	-0.21867	1308.24	116.288	2984.38	283.432	4463.69	115.044	493.624	50.6283	0.202584	10.2565	0.72	10.2565
BTW08_81	9.93	0.66	0.3619	0.02	0.60592	2.76319	0.152705	0.1966	0.0061	-0.19846	1991.17	110.04	2428.3	161.398	2798.18	86.8203	1821.63	99.7014	0.054896	5.47321	1.8	5.47321
BTW08_82	33.3	2.4	0.476	0.033	0.58922	2.10084	0.145647	0.513	0.022	0.43873	2509.82	174	3589.53	258.705	4279	183.505	1381.93	115.854	0.0723625	8.3835	0.019	8.3835
BTW08_83	29.1	2.9	0.324	0.03	0.95895	3.08642	0.28578	0.655	0.016	-0.12623	1809.23	167.522	3456.9	344.502	4635.02	113.222	534.615	63.6104	0.187051	11.8984	0.092	11.8984
BTW08_84	69.8	5	0.755	0.047	0.77029	1.3245	0.0824525	0.662	0.02	0.023763	3625.91	225.719	4325.39	309.842	4650.36	140.494	1446.44	134.539	0.0691354	9.30141	0.051	9.30141
BTW08_85	12.7	1.7	0.275	0.02	0.97212	3.63636	0.264463	0.33	0.022	-0.86842	1566.13	113.9	2657.66	355.75	3617.08	241.139	1135.48	89.5347	0.0880683	7.88517	0.21
BTW08_86	27.8	1.8	0.396	0.024	0.67123	2.52525	0.153046	0.511	0.015	0.18406	2150.59	130.339	3412.07	220.925	4273.26	125.438	1133.4	78.3689	0.0882299	6.91449	0.13	6.91449
BTW08_87	7.37	0.42	0.3055	0.017	0.59458	3.27332	0.182149	0.1756	0.0035	0.067992	1718.52	95.6298	2157.34	122.942	2611.75	52.0564	1580.88	85.5399	0.0632559	5.4109	1.1	5.4109
BTW08_88	10.75	0.65	0.351	0.019	0.45157	2.849	0.15422	0.2228	0.0058	0.19962	1939.37	104.98	2501.75	151.269	3001.04	78.1239	1707.18	90.9886	0.058576	5.32975	0.41	5.32975
BTW08_89	9.73	0.65	0.3391	0.019	0.71255	2.94898	0.165234	0.2077	0.0061	-0.17905	1882.34	105.469	2409.55	160.967	2887.68	84.8092	1682.54	92.6972	0.0594338	5.50935	0.95	5.50935
BTW08_90	6.22	0.35	0.2934	0.017	0.60057	3.40832	0.197483	0.152	0.0031	0.37648	1658.5	96.0956	2007.27	112.949	2368.55	48.3059	1564.25	87.9835	0.0639282	5.62462	1.9	5.62462
BTW08_91	6.38	0.41	0.2679	0.015	0.51322	3.73274	0.209	0.1733	0.0061	-0.032859	1530.13	85.6738	2029.52	130.424	2589.77	91.1576	1393.54	76.029	0.0717599	5.45583	0.24	5.45583
BTW08_92	11.81	0.71	0.3066	0.017	0.47377	3.26158	0.180844	0.2802	0.008	0.17198	1723.95	95.5878	2589.46	155.674	3364.05	96.047	1373.22	75.2703	0.0728215	5.4813	0.19	5.4813
BTW08_93	9.77	0.58	0.2786	0.015	0.62093	3.58938	0.193254	0.2556	0.0061	-0.015503	1584.31	85.3001	2413.33	143.268	3219.79	76.8416	1294.44	68.1653	0.0772534	5.266	0.27	5.266
BTW08_94	12.31	0.93	0.1735	0.012	0.83693	5.76369	0.398641	0.513	0.016	-0.13137	1031.37	71.3337	2628.33	198.566	4279	133.458	471.349	38.6037	0.212157	8.19004	0.39	8.19004
BTW08_95	37.9	2.4	0.511	0.032	0.14261	1.95695	0.122549	0.532	0.022	0.30361	2660.9	166.632	3717.31	235.397	4332.42	179.16	1422.99	113.988	0.0702745	8.01042	0.034	8.01042
BTW08_96	5.1	0.28	0.2775	0.015	0.58473	3.6036	0.194789	0.1324	0.0023	0.43597	1578.76	85.3383	1836.11	100.806	2130.04	37.0022	1516.63	79.3961	0.0659358	5.23504	1.9	5.23504
BTW08_97	6.87	0.4	0.3242	0.017	0.5113	3.08452	0.161742	0.1562	0.0037	0.1121	1810.21	94.9215	2094.79	121.968	2414.94	57.204	1716.74	88.0732	0.0582498	5.13025	0.83	5.13025
BTW08_98	5.212	0.28	0.2964	0.016	0.59963	3.37382	0.182122	0.1279	0.0021	0.2799	1673.43	90.3337	1854.58	99.6321	2069.31	33.9761	1625.87	85.2874	0.0615057	5.24566	0.86	5.24566
BTW08_99	12.58	0.84	0.3842	0.021	0.8121	2.60281	0.142267	0.2362	0.0071	-0.53348	2095.87	114.558	2648.73	176.862	3094.54	93.0197	1836.86	100.073	0.0544408	5.44807	0.7	5.44807
BTW08_101	10.52	0.86	0.348	0.021	0.75997	2.87356	0.173405	0.2147	0.0093	-0.32342	1925.04	116.166	2481.68	202.875	2941.36	127.409	1710.88	102.689	0.0584494	6.0021	0.92	6.0021
BTW08_102	5.53	0.32	0.2412	0.014	0.43616	4.14594	0.240643	0.1665	0.0048	0.26553	1392.93	80.8501	1905.27	110.251	2522.76	72.7283	1268.45	71.3513	0.0788363	5.62507	2.1	5.62507
BTW08_103	6.67	0.45	0.1253	0.0073	0.92421	7.98085	0.464965	0.388	0.011	-0.4939	760.997	44.3358	2068.66	139.565	3863.22	109.524	460.303	28.4101	0.217248	6.17205	1.7	6.17205
BTW08_104	18.6	1.2	0.382	0.022	0.73598	2.6178	0.150763	0.3508	0.0078	-0.0076272	2085.62	120.114	3021.3	194.923	3710.48	82.502	1533.69	87.8572	0.0652023	5.72849	0.74	5.72849
BTW08_105	50.2	6.1	0.595	0.059	0.89349	1.68067	0.166655	0.602	0.03	-0.11985	3009.66	298.437	3996.28	485.604	4512.83	224.892	1365.71	176.553	0.0732221	12.9276	0.036	12.9276
BTW08_106	8.81	0.54	0.3134	0.017	0.62683	3.19081	0.173082	0.2016	0.0047	0.018211	1757.42	95.3289	2318.53	142.112	2839.19	66.1915	1568.14	82.9658	0.0637697	5.2907	0.41	5.2907
BTW08_107	52.4	3.8	0.636	0.04	0.77637	1.57233	0.0988885	0.603	0.018	-0.1274	3173.27	199.577	4039	292.905	4515.24	134.783	1477.58	118.611	0.0676781	8.0274	0.042	8.0274
Sample 5		Location: Bunatrahir West			Grid Coordinates: 54°18'31.6''N, -9°23'35.6''W
Apatite	207U/235Pb	2σ	206U/238Pb	2σ	ρ	238U/206Pb	2σ	207Pb/206Pb	2σ	ρ	206Pb/238U (Ma)	2σ (Ma)	207Pb/235U (Ma)	2σ (Ma)	207Pb/206Pb (Ma)	2σ (Ma)	207Pb corrected Age (Ma)	2σ (Ma)		% age error	U (ppm)	% error
BTW11_1	4.1	0.29	0.1003	0.0059	0.87506	9.97009	0.586476	0.302	0.011	-0.53638	616.167	36.2451	1654.3	117.012	3480.51	126.774	434.732	26.4747	0.230027	6.08988	0.49	6.08988
BTW11_2	10.95	0.86	0.1637	0.011	0.82465	6.10874	0.410483	0.482	0.017	-0.21133	977.306	65.6711	2518.89	197.831	4187.08	147.677	483.91	38.4058	0.20665	7.93656	0.64	7.93656
BTW11_3	28.5	1.8	0.32	0.02	0.72239	3.125	0.195312	0.65	0.016	0.29651	1789.73	111.858	3436.45	217.039	4623.95	113.82	540.818	52.4453	0.184905	9.69741	0.2	9.69741
BTW11_4	7.61	0.48	0.3393	0.019	0.52104	2.94724	0.165039	0.164	0.0047	0.085433	1883.3	105.46	2186.04	137.884	2497.32	71.5696	1778.9	97.943	0.0562145	5.50582	2.3	5.50582
BTW11_5	14.97	0.9	0.438	0.025	0.71623	2.28311	0.130314	0.2488	0.0064	0.15175	2341.68	133.658	2813.33	169.138	3177.15	81.7272	2065.99	119.371	0.0484029	5.77789	2.2	5.77789
BTW11_6	11.12	0.9	0.1619	0.011	0.80377	6.17665	0.419661	0.497	0.017	-0.13657	967.327	65.7233	2533.24	205.028	4232.34	144.768	459.353	37.325	0.217698	8.12557	0.35	8.12557
BTW11_7	16.77	0.97	0.2118	0.012	0.7163	4.72144	0.267503	0.5721	0.0099	0.031593	1238.4	70.1643	2921.78	169	4438.69	76.81	479.965	32.0905	0.208349	6.68602	0.39	6.68602
BTW11_8	26.48	1.6	0.5114	0.028	0.68008	1.95542	0.107062	0.3734	0.0075	-0.021137	2662.6	145.782	3364.43	203.289	3805.27	76.4315	2011.9	112.588	0.0497042	5.5961	0.22	5.5961
BTW11_9	9.4	0.53	0.3646	0.02	0.59966	2.74273	0.150452	0.1883	0.0039	0.26616	2003.94	109.925	2377.83	134.069	2727.37	56.4883	1854.61	100.39	0.0539197	5.41301	0.51	5.41301
BTW11_10	6.79	0.69	0.1396	0.011	0.67651	7.16332	0.564445	0.362	0.023	-0.056801	842.4	66.3782	2084.42	211.819	3758.27	238.785	540.998	48.0271	0.184843	8.87749	3.4	8.87749
BTW11_11	7.9	0.42	0.361	0.019	0.38354	2.77008	0.145794	0.1591	0.002	0.52203	1986.91	104.574	2219.68	118.008	2446.12	30.7494	1903.19	98.8979	0.0525433	5.19642	1.1	5.19642
BTW11_12	14.22	1.1	0.374	0.022	0.65804	2.6738	0.157282	0.272	0.013	-0.26965	2048.19	120.482	2764.49	213.85	3317.59	158.561	1699.56	102.192	0.0588389	6.01286	3.6	6.01286
BTW11_13	40.9	2.5	0.602	0.033	0.66845	1.66113	0.0910586	0.493	0.013	0.001128	3037.89	166.529	3792.75	231.83	4220.41	111.289	1901.37	114.923	0.0525936	6.04419	0.22	6.04419
BTW11_14	18	1	0.3936	0.021	0.51971	2.54065	0.135553	0.3333	0.0071	0.11912	2139.5	114.15	2989.73	166.096	3632.33	77.3763	1629.27	86.4879	0.061377	5.30837	0.32	5.30837
BTW11_15	6.96	0.4	0.1232	0.0068	0.49283	8.11688	0.44801	0.416	0.011	0.27882	748.956	41.3385	2106.34	121.054	3967.94	104.921	425.779	25.4589	0.234864	5.97937	0.33	5.97937
BTW11_16	8.95	0.5	0.3438	0.019	0.40148	2.90867	0.160747	0.1875	0.0039	0.38772	1904.92	105.275	2332.92	130.331	2720.36	56.5834	1750.66	94.8632	0.0571214	5.41872	0.99	5.41872
BTW11_17	15.92	0.9	0.3862	0.021	0.50982	2.58933	0.140797	0.2977	0.0061	0.10191	2105.18	114.471	2872.01	162.362	3458.3	70.862	1690.3	90.8553	0.059161	5.3751	1.1	5.3751
BTW11_18	16.9	1	0.446	0.024	0.62469	2.24215	0.120654	0.2769	0.0091	0.11415	2377.44	127.934	2929.18	173.324	3345.54	109.947	2023.94	111.546	0.0494086	5.51131	0.47	5.51131
BTW11_19	106.6	6.3	1.161	0.069	0.74696	0.861326	0.0511899	0.67	0.014	0.17409	4967.42	295.221	4750.39	280.745	4667.68	97.5336	2752.28	222.952	0.0363335	8.10062	0.061	8.10062
BTW11_20	86.3	6.1	0.983	0.066	0.78957	1.01729	0.0683026	0.647	0.023	0.19788	4413.29	296.314	4538.1	320.77	4617.27	164.138	2281.59	214.894	0.0438291	9.4186	0.034	9.4186
BTW11_21	28.07	1.6	0.488	0.027	0.74666	2.04918	0.113377	0.4172	0.0061	0.33927	2562.02	141.751	3421.54	195.029	3972.25	58.0795	1762.98	97.7139	0.0567223	5.54255	0.22	5.54255
BTW11_22	5.43	0.31	0.2994	0.016	0.33496	3.34001	0.178491	0.1316	0.0029	0.2905	1688.33	90.2249	1889.6	107.878	2119.42	46.7046	1634.85	85.0183	0.0611676	5.20037	2.5	5.20037
BTW11_23	21.42	1.2	0.3197	0.018	0.33828	3.12793	0.176111	0.483	0.012	0.4457	1788.26	100.684	3157.79	176.907	4190.15	104.103	968.089	59.7096	0.103296	6.16778	0.19	6.16778
BTW11_24	52.2	3.1	0.535	0.03	0.70245	1.86916	0.104813	0.718	0.017	0.088156	2762.48	154.906	4035.19	239.638	4767.17	112.872	651.703	79.8863	0.153444	12.2581	0.25	12.2581
BTW11_25	16.36	1.1	0.1952	0.011	0.59618	5.12295	0.288691	0.603	0.019	0.02518	1149.48	64.7762	2898.07	194.858	4515.24	142.271	391.411	36.5871	0.255486	9.3475	0.76	9.3475
BTW11_26	64.5	4	0.795	0.047	0.8397	1.25786	0.0743642	0.5832	0.0094	0.050428	3771.18	222.951	4246.38	263.342	4466.69	71.994	2110.67	136.288	0.0473782	6.45708	0.14	6.45708
BTW11_27	12.02	0.73	0.3065	0.017	0.48857	3.26264	0.180962	0.2828	0.0081	-0.0028241	1723.46	95.5916	2605.97	158.266	3378.46	96.7663	1367.34	75.029	0.0731349	5.48723	0.52	5.48723
BTW11_28	8.2	0.51	0.3217	0.018	0.81184	3.10849	0.173928	0.1874	0.0045	-0.30913	1798.03	100.605	2253.34	140.147	2719.48	65.3023	1639.06	89.5646	0.0610106	5.46439	0.72	5.46439
BTW11_29	8.16	0.7	0.3376	0.02	0.73414	2.96209	0.175479	0.1721	0.0083	-0.38653	1875.11	111.085	2248.92	192.922	2578.17	124.339	1752.6	102.924	0.057058	5.87261	2	5.87261
BTW11_30	7.34	0.4	0.333	0.018	0.36467	3.003	0.162325	0.1602	0.0031	0.48172	1852.91	100.157	2153.69	117.367	2457.77	47.5599	1754.26	92.8416	0.0570042	5.29236	2.1	5.29236
BTW11_31	52.9	3.6	0.67	0.043	0.46515	1.49254	0.0957897	0.582	0.023	0.34326	3305.87	212.168	4048.46	275.51	4463.69	176.4	1694.51	145.716	0.0590141	8.59929	0.067	8.59929
BTW11_32	5.215	0.29	0.3081	0.017	0.49645	3.2457	0.179088	0.1224	0.0019	0.37584	1731.35	95.5305	1855.07	103.158	1991.5	30.9138	1699.34	91.3852	0.0588465	5.3777	3.8	5.3777
BTW11_33	46.1	3.1	0.487	0.033	0.87479	2.05339	0.139141	0.696	0.016	0.21485	2557.68	173.313	3911.53	263.031	4722.48	108.563	678.252	75.8072	0.147438	11.1769	0.093	11.1769
BTW11_34	12.68	0.8	0.3963	0.023	0.557	2.52334	0.146447	0.2318	0.0067	0.036939	2151.98	124.894	2656.18	167.582	3064.52	88.5775	1907.06	110.486	0.0524367	5.7935	1.6	5.7935
BTW11_35	34.3	3.2	0.388	0.034	0.84499	2.57732	0.225848	0.644	0.026	0.052808	2113.55	185.208	3618.71	337.605	4610.55	186.14	692.472	95.2758	0.14441	13.7588	0.074	13.7588
BTW11_36	15.05	0.92	0.3984	0.023	0.641	2.51004	0.144907	0.2732	0.0066	0.096219	2161.67	124.795	2818.41	172.288	3324.49	80.3134	1809.95	103.803	0.0552501	5.73511	0.22	5.73511
BTW11_37	10.81	0.64	0.3598	0.02	0.76123	2.77932	0.154493	0.2174	0.0046	-0.32054	1981.23	110.129	2506.93	148.421	2961.53	62.6635	1762.8	96.3454	0.0567279	5.46547	1.4	5.46547
BTW11_38	9.45	0.56	0.3604	0.02	0.69893	2.77469	0.153979	0.1923	0.0038	-0.067406	1984.07	110.104	2382.7	141.197	2761.93	54.578	1823.99	99.6586	0.0548249	5.46377	1.3	5.46377
BTW11_39	9.09	0.51	0.3632	0.019	0.47396	2.7533	0.144033	0.1843	0.0036	0.26814	1997.32	104.486	2347.1	131.686	2691.95	52.5829	1856.74	95.8346	0.0538578	5.16144	1.5	5.16144
BTW11_40	30.33	1.8	0.537	0.03	0.62975	1.8622	0.104033	0.4144	0.0087	0.11288	2770.88	154.798	3497.56	207.571	3962.17	83.1825	1970.61	113.537	0.0507456	5.76152	0.15	5.76152
BTW11_41	42.2	3.6	0.637	0.041	0.90006	1.56986	0.101043	0.484	0.018	-0.59717	3177.21	204.499	3823.77	326.198	4193.2	155.946	2076.66	152.553	0.0481542	7.34607	0.27	7.34607
BTW11_42	80.8	4.9	0.789	0.046	0.78672	1.26743	0.0738931	0.743	0.016	0.25165	3749.6	218.608	4472.03	271.2	4816.21	103.714	893.367	109.272	0.111936	12.2315	0.11	12.2315
BTW11_43	33.43	1.9	0.53	0.03	0.35609	1.88679	0.1068	0.455	0.015	0.53648	2741.45	155.177	3593.37	204.23	4101.64	135.219	1788.51	111.692	0.0559125	6.24499	0.079	6.24499
BTW11_44	30.58	1.8	0.52	0.029	0.62393	1.92308	0.107248	0.4251	0.0099	0.30561	2699.18	150.531	3505.63	206.349	4000.32	93.1621	1861.9	107.661	0.0537086	5.78232	0.12	5.78232
BTW11_45	113	19	1.12	0.18	0.97341	0.892857	0.143495	0.724	0.031	-0.41667	4843.94	778.49	4809.06	808.602	4779.1	204.63	1854.16	368.771	0.0539329	19.8889	0.13	19.8889
BTW11_46	11.14	0.72	0.1599	0.0099	0.6995	6.25391	0.387203	0.516	0.014	0.068808	956.221	59.2032	2534.91	163.836	4287.58	116.33	429.479	31.6202	0.23284	7.36246	0.39	7.36246
BTW11_47	15.95	1.1	0.392	0.023	0.87789	2.55102	0.149677	0.2946	0.0091	-0.53692	2132.1	125.098	2873.81	198.194	3442.06	106.323	1724.53	101.33	0.0579866	5.87581	0.37	5.87581
BTW11_48	37.3	2.2	0.545	0.031	0.047682	1.83486	0.104368	0.495	0.013	0.56562	2804.34	159.513	3701.53	218.321	4226.39	110.996	1685.71	104.63	0.0593223	6.20692	0.036	6.20692
BTW11_49	5.4	0.3	0.2824	0.016	0.37416	3.54108	0.200628	0.1399	0.0033	0.49903	1603.44	90.8463	1884.85	104.714	2225.97	52.5068	1529.02	84.0314	0.0654014	5.49577	3.2	5.49577
BTW11_50	21.7	1.5	0.2703	0.017	0.9443	3.69959	0.232679	0.579	0.01	-0.53456	1542.32	97.0015	3170.4	219.152	4456.16	76.9631	607.029	43.5252	0.164737	7.1702	0.45	7.1702
BTW11_51	9.32	0.53	0.3657	0.02	0.41293	2.73448	0.149548	0.185	0.0044	0.32384	2009.14	109.879	2369.99	134.774	2698.21	64.1737	1867.91	101.004	0.0535357	5.40732	1.3	5.40732
BTW11_52	64.1	4.1	0.624	0.039	0.83886	1.60256	0.10016	0.729	0.014	-0.041152	3125.82	195.364	4240.16	271.212	4788.97	91.9692	728.251	83.1105	0.137315	11.4123	0.21	11.4123
BTW11_53	12.9	0.77	0.1817	0.011	0.63785	5.50358	0.333183	0.523	0.012	0.25426	1076.26	65.1558	2672.38	159.514	4307.38	98.8309	480.014	33.4643	0.208327	6.97152	0.18	6.97152
BTW11_54	15.61	1.1	0.399	0.024	0.73389	2.50627	0.150753	0.2801	0.0087	-0.15099	2164.43	130.191	2853.23	201.061	3363.49	104.471	1794.61	107.999	0.0557223	6.01797	0.89	6.01797
BTW11_55	11.77	0.87	0.3422	0.02	0.82964	2.92227	0.170793	0.249	0.01	-0.38069	1897.24	110.885	2586.28	191.169	3178.42	127.647	1605.34	93.6513	0.0622922	5.83375	2.6	5.83375
BTW11_56	22.51	1.3	0.2681	0.015	0.56706	3.72995	0.208688	0.618	0.014	0.51749	1531.15	85.6668	3206	185.153	4550.9	103.095	516.26	41.4456	0.193701	8.02805	0.62	8.02805
BTW11_57	11.06	0.65	0.3834	0.021	0.52113	2.60824	0.142862	0.2094	0.0062	0.10043	2092.15	114.593	2528.2	148.583	2900.91	85.8912	1899.21	103.66	0.0526536	5.45809	0.81	5.45809
BTW11_58	17.34	0.99	0.2106	0.012	0.49034	4.74834	0.270561	0.595	0.014	0.42779	1232.01	70.2002	2953.84	168.645	4495.84	105.784	437.965	34.2822	0.228329	7.82761	0.12	7.82761
BTW11_59	12.1	1.4	0.365	0.026	0.90409	2.73973	0.195159	0.236	0.015	-0.74334	2005.83	142.881	2612.19	302.236	3093.19	196.601	1744.36	126.137	0.0573275	7.23111	2.3	7.23111
BTW11_60	20.22	1.1	0.4497	0.025	0.28929	2.2237	0.123622	0.3299	0.0085	0.57704	2393.92	133.084	3101.94	168.75	3616.62	93.1835	1883.69	106.074	0.0530872	5.63116	0.14	5.63116
BTW11_61	15.05	0.93	0.2238	0.012	0.6746	4.46828	0.239586	0.488	0.011	-0.15572	1301.92	69.8082	2818.41	174.161	4205.36	94.7931	657.611	39.3609	0.152065	5.98543	0.4	5.98543
BTW11_62	11.59	0.69	0.332	0.018	0.53644	3.01205	0.163304	0.2516	0.0076	0.07083	1848.07	100.196	2571.87	153.114	3194.86	96.5062	1551.5	83.1082	0.0644536	5.35662	0.15	5.35662
BTW11_63	16.95	1	0.4092	0.022	0.43557	2.44379	0.131387	0.3017	0.0075	0.0839	2211.26	118.885	2932.01	172.98	3478.97	86.4843	1783.4	95.9181	0.0560728	5.3784	0.27	5.3784
BTW11_64	8.95	0.5	0.1419	0.0077	0.45383	7.04722	0.382407	0.4583	0.0095	0.44144	855.398	46.4169	2332.92	130.331	4112.37	85.2444	444.475	26.1165	0.224985	5.87581	0.28	5.87581
BTW11_65	15.91	0.86	0.4039	0.022	0.62531	2.47586	0.134857	0.2843	0.0051	0.59051	2186.97	119.122	2871.41	155.211	3386.71	60.7534	1806.12	97.3586	0.0553673	5.39048	0.84	5.39048
BTW11_66	8.97	0.49	0.2239	0.012	0.49518	4.46628	0.239372	0.2939	0.0049	0.11155	1302.45	69.8052	2334.96	127.551	3438.37	57.3256	981.035	51.4179	0.101933	5.24119	1.3	5.24119
BTW11_67	20.3	3.2	0.449	0.039	0.97269	2.22717	0.193451	0.34	0.03	-0.88398	2390.81	207.665	3105.76	489.578	3662.77	323.186	1850.05	179.108	0.0540526	9.68125	1.5	9.68125
BTW11_68	11.51	0.65	0.3807	0.02	0.33644	2.62674	0.137995	0.2189	0.004	0.38579	2079.55	109.249	2565.39	144.875	2972.62	54.3192	1862.44	96.7171	0.053693	5.19304	3.8	5.19304
BTW11_69	8.61	0.52	0.1394	0.0082	0.63848	7.1736	0.421976	0.452	0.012	0.38144	841.269	49.4864	2297.61	138.764	4091.8	108.632	443.378	28.8256	0.225541	6.50137	0.21	6.50137
BTW11_70	37.1	2.6	0.562	0.036	0.88638	1.77936	0.11398	0.488	0.013	-0.27429	2874.89	184.157	3696.21	259.034	4205.36	112.028	1775.68	121.272	0.0563164	6.82963	0.13	6.82963
BTW11_71	13.04	0.87	0.381	0.021	0.53868	2.62467	0.144667	0.2486	0.0085	-0.080872	2080.95	114.698	2682.55	178.974	3175.87	108.588	1790.56	98.7748	0.0558483	5.51641	1.3	5.51641
BTW11_72	8.46	0.54	0.3258	0.018	0.64423	3.06937	0.169578	0.1868	0.0053	-0.10256	1817.99	100.442	2281.64	145.637	2714.19	77.0086	1661.03	89.9009	0.0602036	5.41236	0.63	5.41236
BTW11_74	20.17	1.1	0.408	0.023	0.57957	2.45098	0.138168	0.3607	0.0056	0.46119	2205.77	124.345	3099.54	169.038	3752.8	58.2637	1614.96	89.8432	0.061921	5.56318	0.36	5.56318
BTW11_75	5.71	0.33	0.2802	0.015	0.55925	3.56888	0.191053	0.1467	0.0028	0.19985	1592.37	85.2446	1932.88	111.708	2307.81	44.0482	1505.01	78.0674	0.0664446	5.18715	7.6	5.18715
BTW11_76	5	0.28	0.2871	0.016	0.60822	3.48311	0.194112	0.126	0.0021	0.26927	1627.02	90.6734	1819.32	101.882	2042.89	34.0482	1579.58	85.3924	0.0633079	5.40601	2.5	5.40601
BTW11_77	11.64	0.68	0.1778	0.012	0.64709	5.6243	0.379593	0.485	0.015	0.68333	1054.94	71.1999	2575.89	150.482	4196.25	129.781	522.586	40.1856	0.191356	7.68976	0.21	7.68976
BTW11_78	8.22	0.56	0.1352	0.0082	0.82663	7.39645	0.448601	0.444	0.011	-0.16411	817.462	49.5798	2255.55	153.663	4065.23	100.715	438.259	28.6623	0.228176	6.54003	0.56	6.54003
BTW11_79	14.7	1.9	0.382	0.028	0.93993	2.6178	0.191881	0.273	0.021	-0.84411	2085.62	152.873	2796.02	361.39	3323.34	255.642	1734.14	133.996	0.0576653	7.72694	3.8	7.72694
BTW11_80	6.51	0.38	0.2976	0.016	0.68023	3.36022	0.180657	0.1575	0.0034	-0.036223	1679.4	90.2901	2047.25	119.502	2429	52.4355	1575.61	82.3401	0.0634674	5.22591	1.7	5.22591
BTW11_81	23.59	1.3	0.4672	0.026	0.5496	2.14041	0.119115	0.3699	0.007	0.24935	2471.27	137.528	3251.6	179.19	3791.01	71.7412	1835.01	102.647	0.0544957	5.59381	0.24	5.59381
BTW11_82	7.57	0.43	0.1312	0.0074	0.72272	7.62195	0.429897	0.4238	0.0072	0.41445	794.708	44.8234	2181.31	123.906	3995.74	67.8843	445.773	25.9209	0.224329	5.81482	0.47	5.81482
BTW11_83	10.3	1.5	0.155	0.016	0.98655	6.45161	0.665973	0.472	0.024	-0.89378	928.931	95.8896	2462.1	358.559	4156.06	211.325	469.733	55.2698	0.212887	11.7662	1	11.7662
BTW11_84	32.46	1.9	0.547	0.031	0.54865	1.82815	0.103607	0.437	0.012	0.19102	2812.68	159.403	3564.35	208.634	4041.55	110.981	1924.27	115.904	0.0519677	6.02326	0.11	6.02326
BTW11_85	7.12	0.41	0.3346	0.018	0.56625	2.98864	0.160776	0.1532	0.0027	0.12108	1860.64	100.094	2126.55	122.456	2381.95	41.9796	1777.5	93.6856	0.0562588	5.27064	3.2	5.27064
BTW11_86	17.9	3.3	0.417	0.046	0.98637	2.39808	0.264537	0.299	0.023	-0.81857	2246.85	247.853	2984.38	550.192	3465.05	266.542	1826.18	206.603	0.054759	11.3133	1.1	11.3133
BTW11_87	43.9	4.4	0.538	0.042	0.9377	1.85874	0.145106	0.576	0.02	-0.47493	2775.07	216.641	3862.96	387.176	4448.59	154.465	1323.45	123.625	0.0755603	9.34117	0.098	9.34117
BTW11_88	21.42	1.2	0.2428	0.013	0.4692	4.11862	0.220519	0.627	0.012	0.4511	1401.24	75.025	3157.79	176.907	4571.85	87.4995	445.711	33.9367	0.224361	7.61407	0.17	7.61407
BTW11_89	7.66	0.42	0.3362	0.018	0.49553	2.97442	0.159249	0.1637	0.003	0.46376	1868.36	100.031	2191.92	120.184	2494.24	45.71	1763.44	92.479	0.0567074	5.24425	0.51	5.24425
BTW11_90	11	0.61	0.1574	0.0086	0.62164	6.35324	0.347127	0.5078	0.009	0.38528	942.312	51.4859	2523.13	139.919	4264.01	75.5733	432.8	26.1533	0.231054	6.04282	0.95
BTW11_92	5.6	0.31	0.31	0.017	0.6247	3.22581	0.176899	0.1303	0.0021	0.27863	1740.71	95.4581	1916.1	106.07	2102.01	33.8774	1694.03	90.5387	0.0590309	5.34458	5.2
BTW11_93	13.94	1	0.3737	0.021	0.69532	2.67594	0.150374	0.2709	0.0097	-0.25043	2046.79	115.019	2745.64	196.961	3311.24	118.564	1700.89	95.9663	0.0587929	5.64213	0.77
BTW11_94	6.08	0.36	0.3037	0.017	0.5402	3.29272	0.184314	0.1445	0.0038	0.11297	1709.63	95.6988	1987.38	117.674	2281.83	60.0067	1632.73	89.0472	0.0612473	5.45389	0.69
BTW11_95	7.31	0.42	0.3401	0.019	0.59837	2.94031	0.164263	0.1561	0.0034	0.36723	1887.15	105.427	2150.03	123.531	2413.85	52.5758	1800.14	98.7503	0.0555512	5.4857	2.2
BTW11_96	26.5	1.5	0.3019	0.018	0.68836	3.31236	0.197491	0.646	0.014	0.58006	1700.72	101.401	3365.17	190.481	4615.04	100.016	517.068	45.7581	0.193398	8.84953	0.29
BTW11_97	7.38	0.41	0.3253	0.018	0.52464	3.07409	0.1701	0.1649	0.0032	0.20808	1815.56	100.461	2158.55	119.919	2506.53	48.641	1704.38	92.1088	0.0586723	5.40423	1.1
BTW11_98	6.34	0.39	0.292	0.016	0.55542	3.42466	0.187652	0.1563	0.0041	0.063931	1651.52	90.494	2024	124.505	2416.02	63.3761	1548.8	82.5221	0.0645661	5.32813	4.3
BTW11_99	13.11	0.75	0.1836	0.011	0.26614	5.44662	0.326323	0.508	0.012	0.5372	1086.61	65.102	2687.6	153.753	4264.59	100.738	506.995	34.5458	0.197241	6.81385	0.12
BTW11_100	6.85	0.4	0.3087	0.017	0.45231	3.23939	0.178392	0.1609	0.0039	0.19301	1734.31	95.5076	2092.21	122.173	2465.14	59.7517	1626.55	87.2973	0.0614797	5.36701	1.2
BTW11_101	76.2	6.3	0.899	0.06	0.87781	1.11235	0.074239	0.611	0.018	-0.44601	4134.26	275.924	4413.26	364.876	4534.38	133.582	2288.94	189.584	0.0436884	8.28262	0.23
BTW11_102	39.2	3.2	0.591	0.038	0.90395	1.69205	0.108795	0.469	0.016	-0.63482	2993.47	192.474	3750.69	306.179	4146.61	141.462	1965.45	139.184	0.0508788	7.08153	0.78
BTW11_103	87.6	5.7	0.877	0.058	0.3977	1.14025	0.07541	0.732	0.024	0.5329	4059.14	268.45	4553.11	296.264	4794.85	157.208	1158.09	165.124	0.086349	14.2583	0.038
BTW11_104	16.94	1.1	0.3653	0.021	0.78323	2.73748	0.157369	0.3419	0.008	-0.23533	2007.25	115.391	2931.44	190.354	3671.28	85.9031	1486.7	84.9665	0.0672631	5.7151	0.46
BTW11_105	10.5	0.66	0.3484	0.019	0.54138	2.87026	0.15653	0.2214	0.0064	-0.10065	1926.95	105.086	2479.92	155.881	2990.9	86.4578	1697.67	91.2933	0.0589042	5.37756	1.6
BTW11_106	20.75	1.1	0.2485	0.014	0.62745	4.02414	0.226712	0.6043	0.0076	0.51922	1430.74	80.6048	3126.99	165.768	4518.37	56.8255	503.551	32.9244	0.19859	6.53845	0.54
BTW11_107	13.34	0.84	0.1676	0.0092	0.6399	5.96659	0.327522	0.569	0.015	0.082353	998.874	54.8308	2704.02	170.268	4430.77	116.804	379.725	28.8909	0.263348	7.60837	0.21
Reference materials
Apatite	207U/235Pb	2σ	206U/238Pb	2σ	ρ	238U/206Pb	2σ	207Pb/206Pb	2σ	ρ	206Pb/238U (Ma)	2σ (Ma)	207Pb/235U (Ma)	2σ (Ma)	207Pb/206Pb (Ma)	2σ (Ma)	207Pb corrected Age (Ma)	2σ (Ma)		% age error	U (ppm)	% error
A_MAD_1	0.59	0.034	0.0748	0.0043	1	13.369	0.768538	0.0571961	9.5e-10	0.21197	465.009	26.7318	470.868	27.1347	499.102	8.28985e-06	464.518	26.1312	0.215277	5.62545	0.55	5.62545
A_MAD_2	0.603	0.033	0.0764	0.0042	1	13.089	0.719553	0.0571961	9.8e-10	0.1154	474.599	26.0905	479.136	26.2214	499.102	8.55164e-06	474.237	25.5022	0.210865	5.37753	0.48	5.37753
A_MAD_3	0.603	0.034	0.0765	0.0043	1	13.0719	0.73476	0.0571961	9.3e-10	0.062898	475.198	26.7105	479.136	27.0159	499.102	8.11533e-06	474.845	26.1081	0.210595	5.49824	0.6	5.49824
A_MAD_4	0.597	0.034	0.0757	0.0043	1	13.21	0.750372	0.0571961	9.1e-10	0.083928	470.405	26.7205	475.328	27.0706	499.102	7.94081e-06	469.986	26.119	0.212772	5.55739	0.63	5.55739
A_MAD_5	0.582	0.032	0.0738	0.0041	1	13.5501	0.752785	0.0571961	1e-09	-0.016133	459.009	25.5005	465.746	25.608	499.102	8.72616e-06	458.439	24.9289	0.218132	5.43777	0.5	5.43777
A_MAD_6	0.602	0.033	0.0763	0.0042	1	13.1062	0.72144	0.0571961	9.3e-10	-0.0011073	474	26.0917	478.502	26.2302	499.102	8.11533e-06	473.63	25.5036	0.211135	5.3847	0.49	5.3847
A_MAD_7	0.613	0.034	0.0777	0.0043	1	12.87	0.71224	0.0571961	8.6e-10	-0.1115	482.38	26.6954	485.45	26.9255	499.102	7.5045e-06	482.129	26.0919	0.207414	5.41181	0.58	5.41181
A_MAD_8	0.6	0.033	0.0761	0.0042	1	13.1406	0.725237	0.0571961	9.3e-10	0.051312	472.802	26.0942	477.234	26.2479	499.102	8.11533e-06	472.416	25.5062	0.211678	5.39911	0.57	5.39911
A_MAD_9	0.591	0.033	0.075	0.0042	1	13.3333	0.746667	0.0571961	7.6e-10	-0.32315	466.209	26.1077	471.506	26.3277	499.102	6.63188e-06	465.733	25.5209	0.214715	5.47971	0.53	5.47971
A_MAD_10	0.578	0.032	0.0733	0.0041	1	13.6426	0.76309	0.0571961	7.9e-10	-0.061225	456.007	25.5065	463.175	25.6429	499.102	6.89367e-06	455.398	24.9354	0.219588	5.47552	0.54	5.47552
A_MAD_11	0.611	0.034	0.0775	0.0043	1	12.9032	0.715921	0.0571961	9.1e-10	-0.1615	481.183	26.6979	484.191	26.9435	499.102	7.94081e-06	480.915	26.0946	0.207937	5.42602	0.41	5.42602
A_MAD_12	0.597	0.033	0.0757	0.0042	1	13.21	0.732922	0.0571961	9.2e-10	0.027916	470.405	26.0991	475.328	26.2744	499.102	8.02807e-06	469.986	25.5115	0.212772	5.42815	0.77	5.42815
A_MAD_13	0.602	0.033	0.0763	0.0042	1	13.1062	0.72144	0.0571961	8e-10	-0.071884	474	26.0917	478.502	26.2302	499.102	6.98093e-06	473.63	25.5036	0.211135	5.3847	0.43	5.3847
A_MAD_14	0.611	0.034	0.0775	0.0043	1	12.9032	0.715921	0.0571961	9.5e-10	-0.17215	481.183	26.6979	484.191	26.9435	499.102	8.28985e-06	480.915	26.0946	0.207937	5.42602	0.65	5.42602
A_MAD_15	0.617	0.034	0.0783	0.0044	1	12.7714	0.717677	0.0571961	7.4e-10	0.13675	485.968	27.3085	487.965	26.8895	499.102	6.45736e-06	485.769	26.6904	0.205859	5.49446	0.54	5.49446
A_MAD_16	0.59	0.034	0.0748	0.0043	1	13.369	0.768538	0.0571961	8.8e-10	-0.10059	465.009	26.7318	470.868	27.1347	499.102	7.67902e-06	464.518	26.1312	0.215277	5.62545	0.57	5.62545
A_MAD_17	0.594	0.034	0.0753	0.0043	1	13.2802	0.758365	0.0571961	7.1e-10	-0.13145	468.008	26.7255	473.419	27.0981	499.102	6.19557e-06	467.556	26.1244	0.213878	5.58744	0.55	5.58744
A_MAD_18	0.59	0.033	0.0748	0.0042	1	13.369	0.750665	0.0571961	7.4e-10	0.15932	465.009	26.1102	470.868	26.3367	499.102	6.45736e-06	464.518	25.5235	0.215277	5.49463	0.5	5.49463
A_MAD_19	0.61	0.034	0.0773	0.0043	1	12.9366	0.71963	0.0571961	9.1e-10	0.038676	479.987	26.7004	483.56	26.9525	499.102	7.94081e-06	479.701	26.0973	0.208463	5.44032	0.49	5.44032
A_MAD_20	0.612	0.034	0.0776	0.0044	1	12.8866	0.730683	0.0571961	8.7e-10	-0.1498	481.781	27.3175	484.821	26.9345	499.102	7.59176e-06	481.522	26.7	0.207675	5.54493	0.47	5.54493
A_MAD_21	0.606	0.035	0.0769	0.0044	1	13.0039	0.744046	0.0571961	8.6e-10	-0.1421	477.593	27.3265	481.034	27.7825	499.102	7.5045e-06	477.273	26.7097	0.209524	5.59631	0.63	5.59631
A_MAD_22	0.623	0.036	0.079	0.0045	1	12.6582	0.721038	0.0571961	8.6e-10	0.46474	490.151	27.92	491.726	28.4143	499.102	7.5045e-06	490.014	27.2872	0.204076	5.56864	0.6	5.56864
A_MAD_23	0.585	0.033	0.0742	0.0041	1	13.4771	0.744691	0.0571961	8.2e-10	0.28441	461.41	25.4957	467.67	26.3814	499.102	7.15545e-06	460.871	24.9236	0.21698	5.40794	0.45	5.40794
A_MAD_24	0.601	0.034	0.0762	0.0043	1	13.1234	0.740557	0.0571961	9.5e-10	0.032626	473.401	26.7142	477.868	27.0341	499.102	8.28985e-06	473.023	26.1122	0.211406	5.52027	0.48	5.52027
A_MAD_25	0.594	0.033	0.0753	0.0042	1	13.2802	0.740729	0.0571961	7.7e-10	-0.13154	468.008	26.104	473.419	26.301	499.102	6.71914e-06	467.556	25.5169	0.213878	5.4575	0.65	5.4575
A_MAD_26	0.618	0.035	0.0784	0.0044	1	12.7551	0.715848	0.0571961	7.7e-10	0.14877	486.565	27.3072	488.593	27.6711	499.102	6.71914e-06	486.375	26.689	0.205603	5.48733	0.55	5.48733
A_MAD_27	0.61	0.035	0.0773	0.0044	1	12.9366	0.736366	0.0571961	8.6e-10	0.39132	479.987	27.3214	483.56	27.7453	499.102	7.5045e-06	479.701	26.7042	0.208463	5.56684	0.52	5.56684
A_MAD_28	0.591	0.033	0.0749	0.0042	1	13.3511	0.748662	0.0571961	7.3e-10	-0.15949	465.609	26.1089	471.506	26.3277	499.102	6.3701e-06	465.126	25.5222	0.214996	5.48716	0.57	5.48716
A_MAD_29	0.615	0.034	0.0779	0.0043	1	12.837	0.708588	0.0571961	7.4e-10	0.039095	483.576	26.6929	486.709	26.9075	499.102	6.45736e-06	483.342	26.0892	0.206893	5.39766	0.4	5.39766
A_MAD_30	0.624	0.035	0.0791	0.0044	1	12.6422	0.703234	0.0571961	7.9e-10	-0.11808	490.748	27.2983	492.351	27.6159	499.102	6.89367e-06	490.621	26.6794	0.203823	5.43789	0.54	5.43789
A_MAD_31	0.616	0.034	0.0781	0.0043	1	12.8041	0.704963	0.0571961	9.7e-10	0.087731	484.772	26.6904	487.337	26.8985	499.102	8.46438e-06	484.556	26.0865	0.206375	5.38359	0.61	5.38359
A_MAD_32	0.608	0.035	0.0771	0.0044	1	12.9702	0.740191	0.0571961	7.4e-10	-0.017019	478.79	27.3239	482.298	27.7639	499.102	6.45736e-06	478.487	26.7069	0.208992	5.58154	0.36	5.58154
A_MAD_33	0.607	0.033	0.077	0.0042	1	12.987	0.708383	0.0571961	7.7e-10	-0.05216	478.191	26.0832	481.666	26.1861	499.102	6.71914e-06	477.88	25.4943	0.209257	5.33487	0.44	5.33487
A_MAD_34	0.607	0.034	0.077	0.0043	1	12.987	0.725249	0.0571961	8.9e-10	-0.038032	478.191	26.7042	481.666	26.9797	499.102	7.76628e-06	477.88	26.1013	0.209257	5.4619	0.45	5.4619
A_MAD_35	0.606	0.035	0.0769	0.0044	1	13.0039	0.744046	0.0571961	7.4e-10	-0.091165	477.593	27.3265	481.034	27.7825	499.102	6.45736e-06	477.273	26.7097	0.209524	5.59631	0.66	5.59631
A_MAD_36	0.61	0.036	0.0773	0.0045	1	12.9366	0.753101	0.0571961	7.6e-10	-0.39032	479.987	27.9423	483.56	28.538	499.102	6.63188e-06	479.701	27.3111	0.208463	5.69335	0.55	5.69335
A_MAD_37	0.576	0.032	0.073	0.0041	1	13.6986	0.769375	0.0571961	7.6e-10	-0.28411	454.204	25.5101	461.888	25.6604	499.102	6.63188e-06	453.574	24.9394	0.220471	5.49842	0.63	5.49842
A_MAD_38	0.615	0.035	0.078	0.0045	1	12.8205	0.739645	0.0571961	7.9e-10	-0.044896	484.174	27.9331	486.709	27.6989	499.102	6.89367e-06	483.949	27.3012	0.206633	5.64134	0.64	5.64134
A_MAD_39	0.589	0.034	0.0747	0.0043	1	13.3869	0.770597	0.0571961	9.5e-10	0.032863	464.41	26.7331	470.229	27.1439	499.102	8.28985e-06	463.91	26.1326	0.215559	5.63311	0.79	5.63311
A_MAD_40	0.609	0.034	0.0773	0.0043	1	12.9366	0.71963	0.0571961	7.6e-10	-0.01039	479.987	26.7004	482.929	26.9616	499.102	6.63188e-06	479.701	26.0973	0.208463	5.44032	0.39	5.44032
A_MAD_41	0.623	0.036	0.079	0.0045	1	12.6582	0.721038	0.0571961	8.5e-10	0.26072	490.151	27.92	491.726	28.4143	499.102	7.41724e-06	490.014	27.2872	0.204076	5.56864	0.58
A_MAD_42	0.642	0.036	0.0815	0.0046	1	12.2699	0.692536	0.0571961	7.4e-10	0.25734	505.07	28.507	503.544	28.2361	499.102	6.45736e-06	505.164	27.8579	0.197955	5.51463	0.43	5.51463
A_MAD_43	0.599	0.033	0.0759	0.0042	1	13.1752	0.729064	0.0571961	8.5e-10	0.085967	471.604	26.0966	476.599	26.2567	499.102	7.41724e-06	471.201	25.5089	0.212224	5.41359	0.57	5.41359
A_MAD_44	0.547	0.031	0.0693	0.004	1	14.43	0.832901	0.0571961	7.8e-10	-0.027077	431.937	24.9314	443.029	25.1077	499.102	6.8064e-06	431.044	24.3789	0.231995	5.65579	0.47	5.65579
A_MAD_45	0.585	0.033	0.0742	0.0042	1	13.4771	0.762854	0.0571961	7e-10	0.048855	461.41	26.1175	467.67	26.3814	499.102	6.10831e-06	460.871	25.5315	0.21698	5.53985	0.46	5.53985
A_MAD_46	0.618	0.036	0.0783	0.0046	1	12.7714	0.750299	0.0571961	8.8e-10	0.1141	485.968	28.5498	488.593	28.4617	499.102	7.67902e-06	485.769	27.9036	0.205859	5.74421	0.66	5.74421
A_MAD_47	0.591	0.033	0.0749	0.0042	1	13.3511	0.748662	0.0571961	7.6e-10	0.080087	465.609	26.1089	471.506	26.3277	499.102	6.63188e-06	465.126	25.5222	0.214996	5.48716	0.41	5.48716
A_MAD_48	0.579	0.033	0.0734	0.0041	1	13.624	0.761012	0.0571961	7.4e-10	0.27425	456.607	25.5053	463.819	26.4353	499.102	6.45736e-06	456.007	24.9341	0.219295	5.46793	0.32	5.46793
A_McClure_1	2.85	0.19	0.1047	0.0057	0.49755	9.5511	0.519974	0.2019	0.0081	-0.22805	641.894	34.9455	1368.81	91.254	2841.62	114.002	533.048	29.0387	0.1876	5.44767	1.1	5.44767
A_McClure_2	1.512	0.097	0.0879	0.0049	0.21604	11.3766	0.634189	0.1255	0.005	0.30291	543.105	30.2755	935.248	59.9994	2035.86	81.11	499.17	27.3948	0.200333	5.48806	0.9	5.48806
A_McClure_3	3.41	0.21	0.1033	0.0061	0.41808	9.68054	0.571649	0.2361	0.009	0.48005	633.719	37.4219	1506.7	92.7881	3093.87	117.937	499.438	29.6805	0.200225	5.94279	0.18	5.94279
A_McClure_4	4.12	0.25	0.1124	0.0065	0.59215	8.8968	0.514494	0.2646	0.0066	0.30504	686.671	39.7096	1658.28	100.624	3274.3	81.672	518.833	29.8717	0.19274	5.75749	0.76	5.75749
A_McClure_5	3.42	0.21	0.1058	0.0063	0.29981	9.4518	0.56282	0.2357	0.0086	0.49935	648.31	38.6045	1509	92.658	3091.16	112.787	511.714	30.5614	0.195422	5.97235	0.4	5.97235
A_McClure_6	5.76	0.35	0.129	0.0075	0.45202	7.75194	0.450694	0.3204	0.0099	0.29025	782.158	45.4743	1940.42	117.907	3571.76	110.363	540.638	32.2074	0.184967	5.9573	0.31	5.9573
A_McClure_7	5.11	0.3	0.125	0.0068	0.10283	8	0.4352	0.2965	0.009	0.51152	759.278	41.3047	1837.77	107.893	3452.03	104.783	546.516	30.2663	0.182977	5.53804	0.15	5.53804
A_McClure_8	2.123	0.13	0.0982	0.0056	0.21741	10.1833	0.580718	0.1557	0.0056	0.40952	603.852	34.4355	1156.31	70.8057	2409.49	86.6612	534.392	30.0306	0.187129	5.61959	0.46	5.61959
A_McClure_9	2.138	0.14	0.0982	0.0055	0.21178	10.1833	0.570348	0.1535	0.0058	0.37009	603.852	33.8206	1161.18	76.0359	2385.29	90.1281	536.003	29.61	0.186566	5.52422	1.1	5.52422
A_McClure_10	3.63	0.23	0.1112	0.0063	0.46867	8.99281	0.509485	0.2375	0.0075	0.2786	679.713	38.5089	1556.13	98.5979	3103.29	97.9987	536.038	30.3171	0.186554	5.65578	0.21	5.65578
A_McClure_11	4.36	0.27	0.1134	0.0064	0.33403	8.81834	0.497684	0.283	0.012	0.36712	692.463	39.0808	1704.79	105.572	3379.56	143.303	507.636	29.8371	0.196991	5.87766	0.22	5.87766
A_McClure_12	2.69	0.18	0.1058	0.0058	0.56289	9.4518	0.518151	0.1851	0.0067	0.057544	648.31	35.5406	1325.71	88.7093	2699.11	97.6986	551.846	29.9878	0.18121	5.4341	0.17	5.4341
A_McClure_13	2.149	0.13	0.0984	0.0054	0.41806	10.1626	0.557704	0.156	0.0047	0.11003	605.025	33.2026	1164.73	70.4583	2412.76	72.6921	535.24	28.8813	0.186832	5.39595	0.75	5.39595
A_McClure_14	2.06	0.15	0.0951	0.0053	0.1212	10.5152	0.586023	0.1566	0.0086	0.33607	585.629	32.6376	1135.62	82.6907	2419.28	132.859	517.172	28.8072	0.193359	5.57014	0.27	5.57014
A_McClure_15	2.092	0.13	0.0934	0.0051	0.34043	10.7066	0.584624	0.1635	0.0049	0.18616	575.614	31.4307	1146.18	71.2255	2492.18	74.6892	503.252	27.078	0.198708	5.38061	0.25	5.38061
A_McClure_16	3.05	0.22	0.1024	0.0057	0.48733	9.76562	0.543594	0.2139	0.0094	-0.065947	628.458	34.9826	1420.23	102.443	2935.33	128.995	512.268	28.7874	0.19521	5.6196	0.75	5.6196
A_McClure_17	3.65	0.25	0.1105	0.0066	0.35434	9.04977	0.540529	0.24	0.01	0.32469	675.651	40.3556	1560.51	106.884	3119.97	129.999	530.624	32.0439	0.188457	6.03891	0.22	6.03891
A_McClure_18	2.377	0.14	0.1014	0.0056	0.48514	9.86193	0.544643	0.1692	0.0045	0.048318	622.608	34.3847	1235.71	72.7805	2549.74	67.8124	541.291	29.3775	0.184743	5.42729	0.39	5.42729
A_McClure_19	2.448	0.16	0.0992	0.0055	0.42061	10.0806	0.558907	0.1758	0.0068	0.058178	609.719	33.805	1256.84	82.1461	2613.64	101.096	524.845	28.8637	0.190532	5.49947	1.1	5.49947
A_McClure_20	2.701	0.17	0.1018	0.0056	0.41889	9.82318	0.540372	0.1933	0.0059	-0.018169	624.949	34.3783	1328.73	83.63	2770.44	84.5609	525.051	28.5707	0.190458	5.4415	0.72	5.4415
A_McClure_21	3.85	0.24	0.1114	0.0064	0.16211	8.97666	0.515715	0.253	0.011	0.49855	680.873	39.1166	1603.27	99.944	3203.64	139.289	524.003	30.8175	0.190839	5.88118	0.14	5.88118
A_McClure_22	2.698	0.16	0.1072	0.0059	0.31551	9.32836	0.513408	0.1856	0.0061	0.34911	656.466	36.1301	1327.91	78.7493	2703.56	88.8562	558.632	30.3867	0.179009	5.43948	0.32	5.43948
A_McClure_23	1.627	0.11	0.0901	0.005	0.16402	11.0988	0.615915	0.1304	0.0058	0.29534	556.129	30.8617	980.7	66.3042	2103.36	93.5543	508.123	27.8259	0.196803	5.47621	0.43
A_McClure_24	4.83	0.4	0.1212	0.0073	0.63668	8.25083	0.496956	0.287	0.016	-0.16556	737.467	44.4184	1790.14	148.252	3401.43	189.627	538.676	34.8364	0.18564	6.46703	0.24	6.46703
A_McClure_25	4.02	0.26	0.1139	0.0064	0.18976	8.77963	0.493324	0.255	0.011	0.3783	695.358	39.0719	1638.25	105.956	3216.08	138.733	533.938	30.7712	0.187288	5.76307	0.15	5.76307
A_McClure_26	4.1	0.26	0.1147	0.0065	0.28895	8.7184	0.494068	0.2627	0.0099	0.34952	699.986	39.6679	1654.3	104.907	3262.97	122.967	531.005	30.6134	0.188322	5.76519	0.16	5.76519

## Sheet: U-Pb zircon
Table 3. Zircon U-Pb geochronology Mullaghmore Sandstone fm
Sample 1		Location: Bunatrahir West			Grid Coordinates: 54°18'31.6''N, -9°23'35.6''W
Zircon	207U/235Pb	2σ	206U/238Pb	2σ	ρ	238U/206Pb	2σ	207Pb/206Pb	2σ	ρ	206Pb/238U (Ma)	2σ (Ma)	207Pb/235U (Ma)	2σ (Ma)	207Pb/206Pb (Ma)	2σ (Ma)	Concordia age (Ma)	Concordia age error (Ma)	Probability
BTW02-1	1.91	0.13	0.182	0.0069	0.20915	5.49451	0.208308	0.0774	0.0058	0.3721	1077.89	40.8651	1084.58	73.8199	1131.51	84.7905	1080.45	31.8169	0.799099	2.9448
BTW02-2	4.8	0.24	0.256	0.011	0.85078	3.90625	0.167847	0.1362	0.0049	0.58823	1469.34	63.1359	1784.9	89.245	2179.43	78.4083	1891.36	36.6387	7.54757e-102	1.93717
BTW02-3	4.64	0.27	0.282	0.012	0.76462	3.5461	0.150898	0.1195	0.0046	0.38159	1601.43	68.1458	1756.49	102.21	1948.76	75.015	1733.18	49.3895	9.98754e-16	2.84965
BTW02-4	3.33	0.16	0.224	0.01	0.44902	4.46429	0.199298	0.1088	0.0057	0.65542	1302.98	58.1686	1488.11	71.5009	1779.42	93.2233	1439.89	37.1187	3.70545e-14	2.57789
BTW02-6	1.861	0.076	0.1166	0.0041	0.57466	8.57633	0.301569	0.1159	0.0046	0.77457	710.964	24.9996	1067.34	43.5884	1893.92	75.1685	732.151	23.5413	1.00923e-162	3.21536
BTW02-8	5.05	0.22	0.333	0.0086	0.672	3.003	0.077555	0.1089	0.0037	0.2385	1852.91	47.8528	1827.75	79.6247	1781.1	60.5147	1835.5	35.2936	0.116674	1.92283
BTW02-9	3.3	0.25	0.188	0.019	0.94418	5.31915	0.537574	0.1357	0.0066	0.80998	1110.53	112.235	1481.05	112.201	2173.03	105.689	1774.99	25.4042	3.10422e-45	1.43123
BTW02-10	4.98	0.2	0.3155	0.0064	0.60231	3.16957	0.0642956	0.1165	0.0039	0.42685	1767.72	35.8586	1815.93	72.929	1903.2	63.7123	1785.28	29.3815	0.00106714	1.64576
BTW02-11	3.173	0.13	0.1481	0.005	0.70378	6.75219	0.227961	0.1577	0.0059	0.57042	890.304	30.0575	1450.61	59.4326	2431.15	90.9561	709.297	27.0662	7.11618e-292	3.81592
BTW02-12	4.53	0.18	0.3107	0.0089	0.61206	3.21854	0.092195	0.1068	0.0038	0.57024	1744.15	49.9612	1736.5	68.9998	1745.51	62.1061	1737.76	32.4947	0.663507	1.86992
BTW02-13	5.22	0.21	0.3364	0.0082	0.48767	2.97265	0.0724606	0.1116	0.0041	0.57945	1869.33	45.5662	1855.89	74.6621	1825.63	67.0708	1860.69	31.3658	0.474995	1.6857
BTW02-14	4.72	0.19	0.322	0.0084	0.77765	3.10559	0.0810154	0.1059	0.0034	0.39594	1799.49	46.9432	1770.8	71.2821	1729.99	55.5428	1773.2	33.5786	0.0265091	1.89367
BTW02-15	4.473	0.18	0.3011	0.0077	0.69372	3.32116	0.0849316	0.1079	0.0034	0.49963	1696.76	43.3911	1725.98	69.4558	1764.26	55.5929	1717.06	32.5508	0.0392488	1.89573
BTW02-16	4.85	0.19	0.3197	0.0078	0.62336	3.12793	0.0763149	0.1091	0.0039	0.46517	1788.26	43.6298	1793.61	70.2653	1784.44	63.7885	1791.93	31.5321	0.731512	1.75968
BTW02-17	4.57	0.2	0.308	0.0068	0.54716	3.24675	0.0716816	0.1074	0.0039	0.36328	1730.86	38.2137	1743.81	76.3157	1755.76	63.7568	1736.03	30.7045	0.438757	1.76866
BTW02-18	0.517	0.046	0.0688	0.0019	0.28126	14.5349	0.401399	0.0552	0.0044	0.091378	428.922	11.8452	423.145	37.6493	420.333	33.5048	428.706	11.4067	0.696312	2.66073
BTW02-19	4.63	0.22	0.3147	0.0096	0.54332	3.17763	0.0969344	0.1041	0.0047	0.34393	1763.79	53.805	1754.69	83.3763	1698.47	76.684	1757.55	37.3088	0.664404	2.12277
BTW02-20	4.55	0.2	0.3116	0.0092	0.7359	3.20924	0.094753	0.1075	0.0036	0.40506	1748.58	51.6267	1740.16	76.4906	1757.47	58.8547	1741.21	36.3502	0.584916	2.08764
BTW02-21	4.67	0.2	0.3047	0.0087	0.66117	3.28192	0.0937075	0.1094	0.0039	0.34096	1714.57	48.9556	1761.88	75.4553	1789.45	63.7919	1749.42	35.183	0.00421923	2.01113
BTW02-22	2.25	0.13	0.2012	0.0051	0.32006	4.97018	0.125984	0.08	0.0044	0.38663	1181.76	29.9552	1196.79	69.1477	1196.99	65.8343	1185.18	25.6971	0.466408	2.1682
BTW02-23	1.85	0.095	0.181	0.0046	0.3599	5.52486	0.140411	0.0747	0.0034	0.22438	1072.44	27.2553	1063.43	54.6086	1060.44	48.2664	1069.89	23.2021	0.59679	2.16864
BTW02-24	4.958	0.19	0.3243	0.0054	0.53353	3.08356	0.0513452	0.1097	0.0037	0.31064	1810.69	30.1503	1812.19	69.4466	1794.43	60.5232	1811.12	24.9758	0.917442	1.37902
BTW02-25	4.23	0.18	0.291	0.011	0.63884	3.43643	0.129899	0.1049	0.0043	0.75562	1646.52	62.2398	1679.86	71.4835	1712.56	70.2004	1679.84	34.9471	0.113678	2.08039
BTW02-26	4.36	0.2	0.3012	0.0086	0.67276	3.32005	0.0947957	0.1053	0.0038	0.32234	1697.26	48.4608	1704.79	78.2014	1719.56	62.0544	1702.32	36.4131	0.646396	2.13903
BTW02-27	10.14	0.41	0.4161	0.0098	0.61115	2.40327	0.0566019	0.173	0.0061	0.45747	2242.75	52.8213	2447.62	98.967	2586.88	91.2137	2368.4	37.5827	1.1025e-28	1.58684
BTW02-28	4.36	0.21	0.2995	0.0082	0.66076	3.3389	0.0914156	0.1071	0.004	0.28765	1688.83	46.2384	1704.79	82.1115	1750.65	65.3836	1697.14	36.7668	0.336162	2.16639
BTW02-29	4.722	0.18	0.3118	0.0069	0.67766	3.20718	0.0709736	0.1102	0.0036	0.48251	1749.56	38.717	1771.15	67.5153	1802.71	58.8906	1762.01	30.1924	0.103572	1.71352
BTW02-30	4.49	0.22	0.285	0.011	0.54844	3.50877	0.135426	0.1134	0.0042	0.56391	1616.49	62.391	1729.12	84.7232	1854.6	68.689	1704.36	40.3514	1.77968e-06	2.36753
BTW02-31	4.88	0.19	0.3237	0.0081	0.69319	3.08928	0.0773036	0.1106	0.0035	0.54252	1807.77	45.2362	1798.81	70.0356	1809.29	57.2561	1800.69	32.1805	0.535831	1.78712
BTW02-32	4.58	0.23	0.288	0.013	0.72265	3.47222	0.156732	0.1159	0.0047	0.59194	1631.53	73.6453	1745.64	87.6629	1893.92	76.8026	1756.92	41.1549	3.52648e-07	2.34244
BTW02-33	3.76	0.18	0.239	0.011	0.77839	4.1841	0.192574	0.1169	0.0043	0.59896	1381.5	63.5835	1584.25	75.8417	1909.36	70.233	1619.93	36.5513	8.85375e-30	2.25635
BTW02-34	1.627	0.068	0.1649	0.0036	0.3667	6.06428	0.132392	0.0707	0.0028	0.46652	983.95	21.481	980.7	40.9881	948.752	37.5743	982.999	18.3537	0.806287	1.86712
BTW02-35	4.89	0.2	0.3177	0.0066	0.49825	3.14762	0.0653897	0.1098	0.0039	0.48351	1778.49	36.9468	1800.53	73.6415	1796.09	63.7956	1787.81	28.9476	0.189458	1.61917
BTW02-36	4.499	0.17	0.249	0.0061	0.71583	4.01606	0.0983855	0.1297	0.0045	0.5148	1433.32	35.1134	1730.79	65.3998	2093.9	72.6489	1458.88	31.2838	5.11131e-122	2.14438
BTW02-38	4.67	0.22	0.3055	0.0099	0.69594	3.27332	0.106075	0.1115	0.0039	0.35299	1718.52	55.6903	1761.88	83.0008	1824.01	63.7994	1753.86	39.1596	0.0144588	2.23278
BTW02-40	1.775	0.082	0.1745	0.0045	0.74762	5.73066	0.147782	0.0743	0.0026	0.10192	1036.86	26.7384	1036.35	47.8765	1049.63	36.7299	1036.79	24.5393	0.959743	2.36686
BTW02-41	4.52	0.19	0.2937	0.0074	0.75487	3.40483	0.0857875	0.1116	0.0037	0.28395	1659.99	41.8248	1734.66	72.917	1825.63	60.5273	1699.68	34.1002	3.75274e-09	2.00627
BTW02-42	4.69	0.19	0.3191	0.0094	0.80549	3.13381	0.0923154	0.1062	0.0035	0.52487	1785.33	52.5921	1765.46	71.5217	1735.18	57.1859	1762.66	33.7778	0.147558	1.9163
BTW02-43	2.871	0.12	0.2383	0.0059	0.54518	4.19639	0.103897	0.0871	0.0032	0.45322	1377.85	34.1139	1374.33	57.4434	1362.71	50.0651	1376.18	27.3012	0.81238	1.98384
BTW02-45	4.51	0.19	0.3122	0.0077	0.63506	3.20307	0.0789996	0.1031	0.0035	0.3692	1751.52	43.199	1732.82	73.0012	1680.66	57.0546	1740	32.6531	0.23035	1.87661
BTW02-46	5.51	0.34	0.338	0.012	0.80521	2.95858	0.105038	0.1189	0.0048	-0.15643	1877.04	66.6405	1902.16	117.374	1939.76	78.3082	1894.47	52.3463	0.149986	2.76312
BTW02-47	4.57	0.19	0.3133	0.007	0.53619	3.19183	0.0713144	0.1071	0.0035	0.37253	1756.93	39.2546	1743.81	72.4999	1750.65	57.2106	1750.39	30.1517	0.429343	1.72257
BTW02-50	4.26	0.22	0.2744	0.0094	0.50772	3.64431	0.124842	0.1108	0.0052	0.29106	1563.1	53.5463	1685.67	87.0533	1812.58	85.0668	1631.44	39.8121	5.83693e-08	2.4403
BTW02-51	4.74	0.22	0.299	0.011	0.65307	3.34448	0.123041	0.115	0.0046	0.56121	1686.35	62.0396	1774.34	82.3534	1879.88	75.1954	1766.17	39.0427	1.98164e-05	2.21058
BTW02-52	4.4	0.18	0.2975	0.0065	0.31248	3.36134	0.0734411	0.1078	0.004	0.43175	1678.9	36.6818	1712.34	70.0503	1762.56	65.4012	1694.07	26.9482	0.0860749	1.59073
BTW02-53	3.95	0.19	0.2843	0.0092	0.54967	3.51741	0.113824	0.1012	0.004	0.41415	1612.98	52.1964	1623.99	78.116	1646.24	65.0688	1620.46	36.8331	0.590406	2.27301
BTW02-55	4.61	0.22	0.307	0.011	0.66947	3.25733	0.116712	0.1085	0.004	0.51025	1725.93	61.841	1751.08	83.5656	1774.38	65.415	1748.79	39.739	0.212978	2.27237
BTW02-56	1.787	0.074	0.1771	0.0044	0.66265	5.64653	0.140286	0.0724	0.0024	0.41696	1051.11	26.1146	1040.73	43.0969	997.206	33.0566	1047.52	22.981	0.324883	2.19384
BTW02-57	2.67	0.17	0.22	0.01	0.77553	4.54545	0.206612	0.0887	0.0062	-0.050348	1281.87	58.267	1320.19	84.0572	1397.69	97.6964	1309.58	46.5828	0.0237514	3.55706
BTW02-58	4.45	0.24	0.297	0.012	0.31063	3.367	0.136041	0.1046	0.006	0.27694	1676.42	67.7339	1721.7	92.8557	1707.29	97.9327	1707.65	40.9235	0.147134	2.39647
BTW02-60	4.65	0.19	0.3121	0.0066	0.63354	3.2041	0.0677573	0.1076	0.0037	0.25872	1751.03	37.0292	1758.29	71.8443	1759.17	60.4918	1754.11	30.0621	0.611224	1.71381
BTW02-61	4.54	0.18	0.3075	0.0084	0.76865	3.25203	0.088836	0.1076	0.0036	0.49608	1728.39	47.2146	1738.33	68.9206	1759.17	58.8569	1737.76	32.9742	0.453242	1.89751
BTW02-63	4.33	0.24	0.295	0.013	0.84299	3.38983	0.149382	0.1071	0.004	0.24752	1666.47	73.4375	1699.09	94.176	1750.65	65.3836	1709.46	43.8179	0.0684648	2.56326
BTW02-64	4.6	0.19	0.3091	0.0099	0.46124	3.2352	0.103619	0.1075	0.0044	0.55421	1736.28	55.6103	1749.27	72.2524	1757.47	71.9335	1746.57	33.2627	0.562478	1.90445
BTW02-65	11.17	0.46	0.477	0.013	0.372	2.09644	0.0571356	0.1691	0.0068	0.51571	2514.19	68.5208	2537.42	104.495	2548.75	102.493	2532.31	36.5895	0.401635	1.44491
BTW02-66	4.54	0.19	0.3164	0.008	0.64828	3.16056	0.0799129	0.1044	0.0036	0.48591	1772.12	44.8072	1738.33	72.7495	1703.77	58.7507	1749.08	33.0074	0.0306337	1.88713
BTW02-67	4.38	0.19	0.2791	0.0093	0.55911	3.58295	0.119389	0.1156	0.0047	0.61895	1586.83	52.8753	1708.57	74.1162	1889.26	76.8123	1677.63	35.5016	1.09786e-09	2.11618
BTW02-68	0.529	0.027	0.0683	0.0016	0.43672	14.6413	0.342988	0.0565	0.0025	0.14074	425.906	9.97729	431.146	22.0056	472.071	20.8881	426.246	9.59625	0.519457	2.25134
BTW02-69	4.442	0.18	0.3049	0.0067	0.66404	3.27976	0.0720709	0.1074	0.0034	0.33241	1715.56	37.6985	1720.21	69.7068	1755.76	55.5828	1717.77	30.4367	0.734001	1.77188
BTW02-71	14.88	0.69	0.556	0.015	0.65044	1.79856	0.0485223	0.1975	0.0076	0.24169	2850.08	76.8906	2807.6	130.191	2805.65	107.964	2810.35	43.892	0.0735171	1.5618
BTW02-72	4.81	0.21	0.315	0.012	0.64066	3.1746	0.120937	0.112	0.0042	0.52869	1765.26	67.2482	1786.65	78.0034	1832.12	68.7045	1786.99	36.6815	0.343008	2.0527
BTW02-73	4.39	0.22	0.291	0.011	0.52226	3.43643	0.129899	0.1118	0.0051	0.50784	1646.52	62.2398	1710.46	85.7178	1828.88	83.4284	1694.99	40.3856	0.00836269	2.38265
BTW02-74	4.585	0.18	0.3108	0.0053	0.55191	3.2175	0.0548673	0.1073	0.0034	0.26943	1744.64	29.751	1746.54	68.5666	1754.06	55.5806	1745.13	25.019	0.893631	1.43365
BTW02-75	1.678	0.078	0.1659	0.0038	0.46548	6.02773	0.138067	0.0723	0.0031	0.3107	989.482	22.6644	1000.22	46.4943	994.397	42.6367	991.638	20.2788	0.430444	2.04498
BTW02-76	4.47	0.18	0.3082	0.0087	0.68015	3.24465	0.0915912	0.1055	0.0037	0.50463	1731.84	48.8872	1725.42	69.4799	1723.05	60.4291	1726.31	33.0899	0.685468	1.91679
BTW02-77	4.57	0.19	0.3111	0.0075	0.79141	3.2144	0.0774928	0.1064	0.0033	0.29272	1746.12	42.0954	1743.81	72.4999	1738.63	53.9238	1744.62	33.6508	0.842516	1.92883
BTW02-78	4.55	0.2	0.3084	0.0073	0.63746	3.24254	0.0767528	0.1072	0.0039	0.27302	1732.83	41.017	1740.16	76.4906	1752.35	63.7517	1736.28	32.8684	0.635319	1.89303
BTW02-79	4.49	0.19	0.3035	0.0096	0.62557	3.29489	0.104221	0.1085	0.004	0.55835	1708.64	54.046	1729.12	73.1701	1774.38	65.415	1726.22	34.84	0.27336	2.01828
BTW02-80	4.68	0.22	0.3137	0.0097	0.68201	3.18776	0.0985695	0.1049	0.0037	0.40872	1758.89	54.3871	1763.67	82.9076	1712.56	60.405	1762.64	38.611	0.787469	2.19053
BTW02-81	4.698	0.18	0.3172	0.0072	0.65862	3.15259	0.0715593	0.1066	0.0034	0.5183	1776.04	40.3137	1766.88	67.6967	1742.08	55.5634	1770.17	30.3669	0.512322	1.71548
BTW02-82	4.61	0.23	0.3112	0.0099	0.6831	3.21337	0.102225	0.1055	0.0046	0.24806	1746.61	55.5637	1751.08	87.3641	1723.05	75.128	1749.9	40.5473	0.806597	2.31712
BTW02-83	4.44	0.24	0.298	0.01	0.54649	3.3557	0.112607	0.1071	0.0049	0.35061	1681.38	56.4223	1719.83	92.964	1750.65	80.0949	1704.25	41.5596	0.0893665	2.43859
BTW02-84	4.52	0.19	0.3078	0.0081	0.70172	3.24886	0.0854964	0.1074	0.0035	0.27885	1729.87	45.5229	1734.66	72.917	1755.76	57.2176	1733.29	33.9835	0.743705	1.96063
BTW02-85	4.506	0.18	0.3105	0.0071	0.72125	3.22061	0.0736436	0.107	0.0034	0.39731	1743.17	39.8599	1732.08	69.1909	1748.94	55.5736	1736.52	31.4453	0.383901	1.81083
BTW02-86	4.57	0.2	0.3066	0.009	0.55588	3.26158	0.095741	0.1059	0.0039	0.55963	1723.95	50.6053	1743.81	76.3157	1729.99	63.7108	1737.99	34.8538	0.305295	2.00541
BTW02-87	2.767	0.12	0.2292	0.0048	0.30899	4.363	0.0913718	0.0872	0.0035	0.42162	1330.3	27.8598	1346.68	58.4032	1364.92	54.7846	1335.52	22.6421	0.341418	1.69538
BTW02-88	10.64	0.54	0.459	0.013	0.61263	2.17865	0.0617047	0.1706	0.0064	0.19117	2435.14	68.9691	2492.2	126.484	2563.54	96.1702	2476.35	46.0074	0.0149961	1.85787
BTW02-92	4.63	0.22	0.3135	0.0094	0.5916	3.18979	0.0956429	0.1077	0.0039	0.23075	1757.91	52.7092	1754.69	83.3763	1760.86	63.7639	1755.72	37.6236	0.869748	2.14292
BTW02-93	15.49	0.67	0.542	0.017	0.81383	1.84502	0.0578696	0.208	0.007	0.30761	2791.81	87.5661	2845.87	123.094	2890.03	97.2605	2864.74	37.4854	0.0146899	1.30851
BTW02-94	4.69	0.18	0.3083	0.0069	0.61112	3.24359	0.0725942	0.1105	0.0037	0.52952	1732.34	38.7711	1765.46	67.7574	1807.65	60.5277	1750.64	29.8053	0.0236353	1.70253
BTW02-95	4.52	0.2	0.3022	0.0099	0.80014	3.30907	0.108404	0.1102	0.0037	0.47792	1702.21	55.764	1734.66	76.7548	1802.71	60.5265	1737.87	36.5576	0.0273422	2.10359
BTW02-96	5.1	0.22	0.3307	0.0082	0.53128	3.02389	0.07498	0.1107	0.0043	0.53668	1841.77	45.6684	1836.11	79.2046	1810.94	70.3435	1838.44	33.2184	0.759619	1.80688
BTW02-97	4.294	0.17	0.2946	0.0069	0.61159	3.39443	0.079503	0.1069	0.0036	0.33997	1664.48	38.9847	1692.21	66.9949	1747.22	58.8401	1679.74	30.167	0.061023	1.79593
BTW02-98	4.2	0.24	0.301	0.012	0.60349	3.32226	0.132449	0.1014	0.0046	0.36271	1696.27	67.6252	1674.02	95.6583	1649.9	74.8476	1678.7	45.5167	0.36088	2.71143
BTW02-99	1.688	0.079	0.1669	0.0042	0.34609	5.99161	0.150778	0.0744	0.0032	0.38875	995.008	25.0392	1004.01	46.9885	1052.34	45.2618	997.805	21.1145	0.559947	2.11609
BTW02-100	4.9	0.32	0.316	0.012	0.74936	3.16456	0.120173	0.1149	0.0049	-0.10016	1770.16	67.2215	1802.26	117.698	1878.32	80.1023	1789.43	53.3386	0.113115	2.98076
BTW02-101	4.1	0.19	0.2954	0.0081	0.5609	3.38524	0.0928248	0.1013	0.0038	0.34946	1668.46	45.7499	1654.3	76.6628	1648.07	61.823	1660.26	34.3202	0.439799	2.06716
BTW02-102	4.7	0.24	0.306	0.011	0.79673	3.26797	0.117476	0.1107	0.0037	0.2602	1720.99	61.8658	1767.24	90.242	1810.94	60.5281	1767.63	42.7356	0.00467086	2.41768
BTW02-103	4.15	0.17	0.2898	0.0085	0.64359	3.45066	0.10121	0.1029	0.0035	0.48623	1640.53	48.1177	1664.21	68.1724	1677.08	57.0435	1659.54	33.0322	0.152131	1.99044
BTW02-104	3.778	0.16	0.2748	0.0085	0.65982	3.63901	0.11256	0.0984	0.0035	0.59672	1565.12	48.4117	1588.08	67.256	1594.02	56.6979	1583.8	33.5927	0.16099	2.12102
BTW02-105	13.47	0.52	0.526	0.01	0.55133	1.90114	0.0361434	0.1875	0.0062	0.42595	2724.58	51.798	2713.18	104.741	2720.36	89.9531	2717	34.0999	0.544725	1.25505
BTW02-106	1.791	0.078	0.1726	0.0047	0.51197	5.79374	0.157767	0.0753	0.003	0.39067	1026.42	27.95	1042.19	45.3885	1076.52	42.8893	1032.66	23.5127	0.241779	2.27691
BTW02-107	4.551	0.17	0.3094	0.0057	0.52978	3.23206	0.0595435	0.1074	0.0035	0.36221	1737.75	32.0142	1740.34	65.0096	1755.76	57.2176	1738.76	25.7048	0.857317	1.47834
BTW02-108	4.86	0.23	0.312	0.011	0.47639	3.20513	0.113001	0.1138	0.0045	0.46795	1750.54	61.7178	1795.35	84.9651	1860.96	73.5882	1784.61	38.4681	0.0703936	2.15554
BTW02-109	4.521	0.18	0.3052	0.0073	0.69874	3.27654	0.0783707	0.1088	0.0035	0.51858	1717.04	41.0695	1734.84	69.0713	1779.42	57.2424	1728.22	31.7599	0.187284	1.83772
BTW02-111	2.01	0.094	0.1876	0.0047	0.57612	5.33049	0.133546	0.0785	0.003	0.1456	1108.36	27.7681	1118.89	52.3263	1159.56	44.3142	1110.97	24.6113	0.435172	2.2153
BTW02-112	4.42	0.18	0.3108	0.0067	0.31609	3.2175	0.0693606	0.1036	0.004	0.4663	1744.64	37.6097	1716.09	69.8862	1689.59	65.2353	1730.57	26.8769	0.141862	1.55307
BTW02-113	3.13	0.12	0.2436	0.005	0.67691	4.10509	0.0842588	0.0937	0.0031	0.31152	1405.39	28.8462	1440.09	55.2113	1502.07	49.6951	1414.72	25.1504	0.00223471	1.77776
BTW02-114	4.6	0.2	0.3136	0.0082	0.74273	3.18878	0.08338	0.1069	0.0035	0.27621	1758.4	45.9785	1749.27	76.0551	1747.22	57.2056	1751.96	35.2341	0.509583	2.01112
BTW02-116	4.09	0.18	0.268	0.01	0.75883	3.73134	0.139229	0.1124	0.0045	0.41841	1530.64	57.1135	1652.31	72.7178	1838.58	73.6086	1661.32	35.5077	1.32388e-13	2.13732
BTW02-120	4.78	0.19	0.3155	0.0078	0.58421	3.16957	0.0783603	0.1106	0.0038	0.45099	1767.72	43.7026	1781.39	70.8085	1809.29	62.1638	1776.66	31.5247	0.406334	1.77438
Sample 2		Location: Bunatrahir West			Grid Coordinates: 54°18'31.6''N, -9°23'35.6''W
Zircon	207U/235Pb	2σ	206U/238Pb	2σ	ρ	238U/206Pb	2σ	207Pb/206Pb	2σ	ρ	206Pb/238U (Ma)	2σ (Ma)	207Pb/235U (Ma)	2σ (Ma)	207Pb/206Pb (Ma)	2σ (Ma)	Concordia age (Ma)	Concordia age error (Ma)	Probability
BTW05core1	3.96	0.17	0.2938	0.0082	0.54981	3.40368	0.0949971	0.0987	0.0038	0.50277	1660.49	46.3445	1626.04	69.8048	1599.7	61.5894	1636.82	32.5304	0.0574858	1.98742
BTW05rim1	3.31	0.17	0.231	0.008	0.80351	4.329	0.149922	0.1037	0.0039	0.27144	1339.74	46.3979	1483.41	76.1873	1691.37	63.61	1394.72	40.3283	3.69715e-28	2.8915
BTW05core2	3.61	0.16	0.2711	0.0069	0.60042	3.68868	0.0938837	0.0989	0.0036	0.45174	1546.38	39.3583	1551.74	68.775	1603.48	58.3674	1548.99	31.4478	0.73321	2.03021
BTW05rim2	3.58	0.15	0.268	0.0064	0.62026	3.73134	0.0891067	0.0977	0.0033	0.38771	1530.64	36.5526	1545.11	64.7391	1580.68	53.3904	1537.31	29.6873	0.313891	1.93112
BTW05core3	4.56	0.19	0.3077	0.0078	0.53841	3.24992	0.0823834	0.1054	0.0038	0.43297	1729.38	43.8387	1741.99	72.5829	1721.3	62.0584	1737	31.9339	0.475137	1.83845
BTW05rim3	2.129	0.11	0.1463	0.005	0.64832	6.83527	0.233605	0.1034	0.0046	0.16684	880.189	30.0817	1158.26	59.8444	1686.03	75.0071	860.811	28.1191	2.60587e-71	3.26658
BTW05core4	12.9	0.52	0.512	0.016	0.71622	1.95312	0.0610352	0.1825	0.0063	0.59099	2665.16	83.2863	2672.38	107.724	2675.72	92.3674	2673.62	36.9871	0.767516	1.38341
BTW05rim4	10.65	0.49	0.433	0.013	0.86566	2.30947	0.0693374	0.1807	0.0058	0.30007	2319.23	69.6304	2493.08	114.705	2659.31	85.3568	2565.6	37.8925	3.46618e-31	1.47694
BTW05core5	4.18	0.22	0.298	0.012	0.62731	3.3557	0.135129	0.1026	0.0045	0.44554	1681.38	67.7067	1670.11	87.9004	1671.68	73.3194	1671.36	42.7592	0.629843	2.55836
BTW05core5_1	3.71	0.23	0.266	0.012	0.60987	3.7594	0.169597	0.1051	0.0062	0.36344	1520.47	68.5925	1573.53	97.5502	1716.06	101.233	1559.46	48.4759	0.0335801	3.1085
BTW05core6	0.536	0.035	0.0661	0.0029	0.31447	15.1286	0.663736	0.0586	0.0035	0.37229	412.616	18.1027	435.784	28.456	552.267	32.9852	419.498	15.9525	0.0572898	3.80275
BTW05rim6	0.601	0.04	0.0637	0.0015	0.53853	15.6986	0.369669	0.07	0.0039	-0.1207	398.088	9.37413	477.868	31.8049	928.353	51.7225	390.445	8.83276	3.19248e-12	2.26223
BTW05-7	5.52	0.24	0.3416	0.0097	0.64279	2.9274	0.0831258	0.1181	0.0044	0.3825	1894.36	53.7919	1903.72	82.7702	1927.67	71.8185	1901.73	36.6425	0.607867	1.9268
BTW05-8	4.05	0.17	0.2876	0.0083	0.64917	3.47705	0.100346	0.1015	0.0036	0.48959	1629.52	47.0273	1644.3	69.02	1651.73	58.5835	1640.75	33.4014	0.361916	2.03574
BTW05-9	2.704	0.11	0.2285	0.0053	0.44195	4.37637	0.101509	0.0876	0.0033	0.52585	1326.63	30.7709	1329.56	54.087	1373.73	51.75	1327.88	24.532	0.848947	1.84746
BTW05-10	2.15	0.083	0.1973	0.0048	0.5997	5.06842	0.123307	0.0796	0.0027	0.59098	1160.8	28.2404	1165.05	44.9765	1187.09	40.2658	1162.73	23.52	0.718025	2.02283
BTW05-11	2.41	0.14	0.1994	0.007	0.66112	5.01505	0.176055	0.0868	0.0036	0.15974	1172.1	41.1468	1245.58	72.3575	1356.06	56.2421	1192.67	36.3226	1.07946e-05	3.04549
BTW05-12	4.843	0.19	0.3197	0.0088	0.57124	3.12793	0.0860989	0.1097	0.0041	0.64812	1788.26	49.2234	1792.4	70.3192	1794.43	67.0663	1791.52	32.1256	0.819667	1.79321
BTW05-13	5.58	0.25	0.3442	0.009	0.54104	2.90529	0.0759663	0.1189	0.0045	0.41568	1906.84	49.8593	1913.02	85.7086	1939.76	73.4139	1910.66	35.6185	0.753819	1.8642
BTW05-14	4.06	0.19	0.2862	0.0086	0.821	3.49406	0.104993	0.1022	0.0033	0.30079	1622.51	48.7547	1646.31	77.044	1664.46	53.7447	1641.83	38.01	0.0543841	2.3151
BTW05-15	3.43	0.19	0.262	0.011	0.63123	3.81679	0.160247	0.0961	0.0045	0.49497	1500.07	62.9799	1511.3	83.7161	1549.73	72.5679	1509.25	42.8791	0.612211	2.84109
BTW05-16	1.835	0.077	0.1754	0.005	0.64568	5.70125	0.162522	0.0755	0.0027	0.4701	1041.8	29.6977	1058.07	44.3986	1081.84	38.6884	1049.6	25.0305	0.160444	2.38476
BTW05-17	1.669	0.095	0.1728	0.0059	0.14104	5.78704	0.19759	0.0703	0.0044	0.51144	1027.52	35.0832	996.805	56.7385	937.128	58.6538	1013.83	25.6107	0.170646	2.52614
BTW05-18	2.158	0.087	0.1982	0.0048	0.60381	5.04541	0.12219	0.0792	0.0028	0.31813	1165.64	28.2295	1167.63	47.0731	1177.14	41.616	1166.43	23.9813	0.868767	2.05595
BTW05-19	3.84	0.18	0.2779	0.007	0.59982	3.59842	0.0906402	0.1008	0.0039	0.2003	1580.78	39.8181	1601.17	75.055	1638.89	63.4095	1588.97	32.7035	0.214579	2.05816
BTW05-20	11.39	0.48	0.403	0.012	0.73109	2.48139	0.0738875	0.2026	0.0068	0.47076	2182.84	64.9977	2555.61	107.699	2847.26	95.5644	2532.01	40.1937	2.47036e-92	1.58742
BTW05-21	4.62	0.21	0.3074	0.0092	0.61955	3.25309	0.0973599	0.107	0.0042	0.46005	1727.9	51.7133	1752.89	79.6767	1748.94	68.6498	1745.79	36.7277	0.176079	2.10379
BTW05-22	4.25	0.2	0.295	0.011	0.50974	3.38983	0.1264	0.1078	0.0047	0.49128	1666.47	62.1394	1683.74	79.2347	1762.56	76.8464	1680.59	37.7893	0.474495	2.24857
BTW05-23	4.95	0.3	0.272	0.013	0.57522	3.67647	0.175714	0.1362	0.0074	0.40356	1550.95	74.1261	1810.83	109.747	2179.43	118.413	1726.66	52.3761	6.82715e-21	3.03338
BTW05-24	14.2	0.59	0.529	0.014	0.69059	1.89036	0.0500284	0.1959	0.0065	0.40806	2737.24	72.4411	2763.16	114.807	2792.34	92.6504	2763.84	39.3706	0.22387	1.42449
BTW05-25	3.41	0.17	0.2652	0.0087	0.38839	3.77074	0.123701	0.0928	0.0043	0.60141	1516.39	49.7459	1506.7	75.1141	1483.81	68.7541	1510.54	34.4217	0.675773	2.27877
BTW05-26	3.886	0.16	0.2861	0.008	0.75425	3.49528	0.0977359	0.0989	0.0031	0.41625	1622.01	45.3551	1610.78	66.3212	1603.48	50.2608	1612.32	32.9995	0.396797	2.04671
BTW05-27	0.569	0.027	0.0735	0.002	0.5988	13.6054	0.370216	0.0566	0.0023	0.27762	457.208	12.441	457.368	21.7029	475.982	19.342	457.223	11.9375	0.981876	2.61087
BTW05-28	2.057	0.091	0.1912	0.005	0.45506	5.23013	0.136771	0.0785	0.0031	0.40296	1127.87	29.4946	1134.62	50.1948	1159.56	45.7914	1130.55	24.2896	0.653269	2.14848
BTW05-29	3.697	0.16	0.2733	0.0082	0.65157	3.65898	0.109783	0.0975	0.0035	0.53866	1557.53	46.7316	1570.72	67.9782	1576.84	56.6047	1567.37	33.7083	0.415212	2.15063
BTW05-30	4.034	0.16	0.2864	0.0081	0.65468	3.49162	0.0987504	0.1022	0.0035	0.57916	1623.51	45.9164	1641.08	65.0898	1664.46	57.0019	1637.65	31.8033	0.260075	1.94201
BTW05-31	4.73	0.2	0.3146	0.0075	0.67485	3.17864	0.0757781	0.1088	0.0036	0.30665	1763.3	42.0368	1772.57	74.9501	1779.42	58.8779	1768.4	33.067	0.525127	1.86988
BTW05-32	4.41	0.19	0.3057	0.008	0.56385	3.27118	0.085605	0.1048	0.004	0.55254	1719.51	44.9987	1714.22	73.8553	1710.81	65.298	1716.24	32.9551	0.763982	1.92019
BTW05-33	1.82	0.075	0.1775	0.0037	0.53812	5.6338	0.117437	0.0748	0.0027	0.26509	1053.3	21.9562	1052.69	43.3799	1063.13	38.3751	1053.17	19.6429	0.958033	1.86511
BTW05-34	0.523	0.026	0.067	0.002	0.54641	14.9254	0.445534	0.0579	0.0024	0.34061	418.056	12.4793	427.153	21.2352	525.98	21.8023	419.325	11.9034	0.218914	2.8387
BTW05-35	14.91	0.63	0.545	0.015	0.52988	1.83486	0.0505008	0.2015	0.0082	0.39151	2804.34	77.1838	2809.51	118.712	2838.38	115.507	2809	39.8728	0.846892	1.41947
BTW05-36	0.532	0.034	0.0664	0.0034	0.64171	15.0602	0.771157	0.0568	0.003	0.48038	414.43	21.2208	433.136	27.6816	483.777	25.5516	421.108	19.455	0.0419152	4.61994
BTW05-37	8.48	0.51	0.391	0.014	0.84766	2.55754	0.0915745	0.1574	0.0061	-0.11809	2127.46	76.1752	2283.78	137.35	2427.92	94.0935	2273.01	55.1574	4.00209e-20	2.42662
BTW05-38	4.63	0.21	0.317	0.011	0.701	3.15457	0.109465	0.107	0.0038	0.42373	1775.06	61.5952	1754.69	79.5865	1748.94	62.1117	1754.7	37.8738	0.289495	2.15842
BTW05-39	3.62	0.17	0.2568	0.0092	0.75839	3.89408	0.139508	0.1017	0.0036	0.40356	1473.45	52.7871	1553.94	72.9749	1655.38	58.5974	1546.68	37.5283	1.49178e-07	2.42638
BTW05-40	7.22	0.31	0.2833	0.0089	0.76248	3.52983	0.110891	0.1907	0.0065	0.32428	1607.96	50.5148	2138.98	91.8397	2748.21	93.6725	1415.87	44.507	3.59644e-237	3.14344
BTW05-41	2.717	0.12	0.2303	0.006	0.82176	4.34216	0.113126	0.0864	0.0027	0.1318	1336.07	34.8086	1333.11	58.8788	1347.15	42.0983	1334.92	30.5461	0.758068	2.28823
BTW05-42	3.509	0.14	0.2647	0.0056	0.52635	3.77786	0.0799245	0.0965	0.0035	0.42259	1513.84	32.0269	1529.24	61.0128	1557.53	56.4906	1519.8	26.1511	0.295242	1.7207
BTW05-43	3.79	0.18	0.2852	0.0071	0.49355	3.50631	0.087289	0.0981	0.0038	0.36454	1617.5	40.2673	1590.63	75.5444	1588.32	61.5251	1605.51	31.6092	0.146907	1.9688
BTW05-44	4.74	0.23	0.313	0.012	0.7645	3.19489	0.122488	0.1092	0.0039	0.41371	1755.45	67.3017	1774.34	86.0967	1786.11	63.7897	1776.61	40.336	0.322243	2.27039
BTW05-45	17.09	0.77	0.575	0.022	0.63693	1.73913	0.0665406	0.214	0.0077	0.63569	2928.32	112.04	2939.9	132.459	2936.08	105.644	2941.31	42.2955	0.743441	1.43798
BTW05-46	5.92	0.5	0.254	0.013	0.8871	3.93701	0.2015	0.1674	0.008	-0.2929	1459.07	74.6769	1964.17	165.893	2531.81	120.995	1015.5	48.3634	8.36579e-68	4.76251
BTW05-47	13.49	0.67	0.514	0.02	0.74655	1.94553	0.0757014	0.1902	0.007	0.39663	2673.68	104.034	2714.58	134.824	2743.89	100.984	2723.76	44.6327	0.164349	1.63864
BTW05-48	2.72	0.18	0.195	0.01	0.83526	5.12821	0.262985	0.1032	0.004	0.36103	1148.4	58.8925	1333.93	88.275	1682.45	65.2114	1233.08	51.4596	7.06736e-35	4.17325
BTW05-49	1.702	0.079	0.1655	0.0048	0.52018	6.0423	0.175245	0.0731	0.003	0.25246	987.269	28.6338	1009.28	46.8469	1016.73	41.7261	995.45	24.4243	0.113132	2.45359
BTW05-50	1.247	0.068	0.1372	0.0045	0.75181	7.28863	0.239059	0.0663	0.0028	-0.010527	828.81	27.184	822.05	44.8271	815.861	34.4557	827.75	25.3127	0.506589	3.05802
BTW05-51	16	0.68	0.566	0.015	0.66632	1.76678	0.0468229	0.2072	0.0068	0.41256	2891.38	76.6266	2876.8	122.264	2883.77	94.6411	2876.63	40.6186	0.527069	1.41202
BTW05-52	0.516	0.021	0.0672	0.0017	0.51606	14.881	0.376453	0.0561	0.0022	0.50936	419.264	10.6064	422.476	17.1938	456.328	17.8952	419.902	9.9668	0.605374	2.3736
BTW05-53	1.8	0.12	0.1754	0.0056	0.19142	5.70125	0.182024	0.0747	0.005	0.41023	1041.8	33.2614	1045.46	69.6972	1060.44	70.98	1042.87	27.221	0.879361	2.61019
BTW05-54	4.1	0.19	0.2926	0.0092	0.74633	3.41763	0.107458	0.1026	0.0036	0.37775	1654.51	52.0215	1654.3	76.6628	1671.68	58.6555	1654.33	37.5692	0.989326	2.27096
BTW05-55	4.72	0.23	0.3192	0.0094	0.49596	3.13283	0.0922576	0.1057	0.0047	0.46143	1785.82	52.59	1770.8	86.2888	1726.52	76.7707	1776.48	37.0898	0.4922	2.08782
BTW05-56	3.182	0.13	0.2494	0.0088	0.68883	4.00962	0.141478	0.0928	0.0034	0.63029	1435.38	50.647	1452.8	59.3538	1483.81	54.3637	1452.61	31.5677	0.289245	2.17317
BTW05-57	0.493	0.021	0.0648	0.0017	0.52725	15.4321	0.404854	0.0567	0.0021	0.48684	404.751	10.6185	406.953	17.3347	479.884	17.7735	405.152	10.0381	0.723649	2.47762
BTW05-58	4.65	0.23	0.313	0.01	0.79249	3.19489	0.102073	0.1076	0.0036	0.18165	1755.45	56.0847	1758.29	86.9694	1759.17	58.8569	1757.97	41.209	0.84996	2.34412
BTW05-59	1.81	0.13	0.1783	0.0066	0.42255	5.60852	0.207607	0.0748	0.0043	0.17017	1057.68	39.1514	1049.08	75.3481	1063.13	61.1159	1055.21	33.6834	0.70519	3.19209
BTW05-60	0.515	0.022	0.0687	0.0017	0.44321	14.556	0.360193	0.0543	0.0021	0.40513	428.319	10.5989	421.806	18.0189	383.513	14.832	426.981	9.86242	0.341818	2.30981
BTW05-61	0.67	0.17	0.0613	0.0028	-0.99998	16.3132	0.745139	0.096	0.027	0.99999	383.527	17.5183	520.712	132.121	1547.77	435.311	401.943	0.0935958	0.0300975	0.0232859
BTW05-62	4.17	0.17	0.2904	0.0069	0.43021	3.44353	0.0818193	0.106	0.0041	0.53261	1643.53	39.0508	1668.15	68.0059	1731.73	66.9818	1656.27	28.8235	0.175143	1.74026
BTW05-63	3.8	0.22	0.273	0.011	0.67608	3.663	0.147594	0.1015	0.0046	0.41215	1556.01	62.6964	1592.75	92.2116	1651.73	74.8567	1583.52	45.7528	0.0800276	2.88932
BTW05-64	1.59	0.13	0.1594	0.0062	0.22887	6.27353	0.244014	0.0714	0.0063	0.37442	953.442	37.0849	966.297	79.0054	968.887	85.49	956.778	31.3862	0.638871	3.2804
BTW05-65	4.45	0.22	0.3031	0.0094	0.64867	3.29924	0.102319	0.1064	0.0043	0.29371	1706.66	52.9285	1721.7	85.1177	1738.63	70.2643	1716.71	39.3054	0.416576	2.28958
BTW05-66	4.7	0.19	0.3132	0.0093	0.57457	3.19285	0.0948068	0.1092	0.004	0.57354	1756.43	52.1547	1767.24	71.4416	1786.11	65.4253	1765.3	33.2084	0.570755	1.88118
BTW05-67	0.569	0.026	0.0706	0.0023	0.55539	14.1643	0.461443	0.0584	0.0025	0.38526	439.769	14.3268	457.368	20.899	544.801	23.3219	444.639	13.2224	0.0171249	2.97374
BTW05-68	3.19	0.15	0.2567	0.0083	0.37513	3.8956	0.125958	0.0912	0.0044	0.56848	1472.94	47.6251	1454.74	68.4047	1450.78	69.9939	1461.47	32.1858	0.412279	2.20228
BTW05-69	4.87	0.22	0.3229	0.0078	0.6472	3.09693	0.0748098	0.1118	0.0041	0.29305	1803.88	43.5746	1797.08	81.1823	1828.88	67.0699	1800.46	34.4667	0.670296	1.91433
BTW05-70	3.46	0.18	0.2666	0.0072	0.56063	3.75094	0.101301	0.0953	0.0042	0.12373	1523.52	41.1453	1518.15	78.9788	1534.01	67.6059	1521.49	33.9548	0.768785	2.23168
BTW05-71	1.503	0.083	0.155	0.0046	0.43933	6.45161	0.191467	0.0701	0.0034	0.21277	928.931	27.5683	931.604	51.4459	931.284	45.1693	929.65	24.1688	0.867988	2.59977
BTW05-72	3.76	0.18	0.2795	0.0083	0.68013	3.57782	0.106246	0.0977	0.0036	0.255	1588.84	47.1821	1584.25	75.8417	1580.68	58.2441	1585.93	36.4872	0.775533	2.30069
BTW05-73	1.026	0.052	0.0888	0.0033	0.45567	11.2613	0.418493	0.0846	0.0039	0.53901	548.436	20.3811	716.925	36.3354	1306.39	60.2235	575.616	19.0102	3.27888e-39	3.30259
BTW05-74	3.81	0.19	0.273	0.011	0.89732	3.663	0.147594	0.1012	0.0033	0.00087788	1556.01	62.6964	1594.86	79.5337	1646.24	53.6817	1617.51	36.1333	0.00332647	2.23388
BTW05-75	4.29	0.19	0.2854	0.009	0.67323	3.50385	0.110493	0.1082	0.0038	0.43809	1618.5	51.0389	1691.44	74.9124	1769.33	62.1391	1675.19	36.2691	1.64083e-05	2.16507
BTW05-76	2.837	0.14	0.2307	0.0067	0.75832	4.33463	0.125887	0.0915	0.0031	0.089952	1338.17	38.8631	1365.38	67.3785	1457.03	49.3639	1347.76	33.8921	0.0312896	2.5147
BTW05-77	1.476	0.064	0.1529	0.0033	0.52959	6.54022	0.141156	0.0692	0.0025	0.34955	917.199	19.7957	920.591	39.9172	904.708	32.6845	917.744	18.0847	0.765539	1.97056
BTW05-78	2.03	0.13	0.1926	0.0069	-0.089205	5.19211	0.18601	0.0782	0.0056	0.5383	1135.44	40.6779	1125.62	72.0838	1151.96	82.4932	1131.21	26.9981	0.74211	2.38667
BTW05-79	6.91	0.35	0.268	0.01	0.89097	3.73134	0.139229	0.1905	0.0061	0.28736	1530.64	57.1135	2099.94	106.365	2746.48	87.9451	874.087	37.1718	1.49838e-234	4.25264
BTW05-80	4.05	0.22	0.2816	0.0078	0.71649	3.55114	0.0983624	0.106	0.0039	-0.004694	1599.42	44.302	1644.3	89.32	1731.73	63.7144	1610.17	38.4058	0.00521813	2.3852
BTW05-81	4.29	0.19	0.2996	0.0088	0.51999	3.33778	0.098039	0.1031	0.0041	0.41063	1689.32	49.6197	1691.44	74.9124	1680.66	66.8354	1690.77	34.2235	0.915101	2.02414
BTW05-82	3.22	0.16	0.2438	0.0097	0.76273	4.10172	0.163194	0.0938	0.0034	0.39403	1406.42	55.9569	1461.98	72.6452	1504.09	54.5193	1460.93	38.5331	0.000598632	2.63758
BTW05-83	2.84	0.15	0.2312	0.0074	0.13412	4.32526	0.138438	0.0878	0.004	0.59085	1340.79	42.9144	1366.17	72.1569	1378.11	62.7841	1352.96	29.6722	0.326524	2.19313
BTW05-84	2.92	0.14	0.2432	0.0073	0.6613	4.11184	0.123423	0.0877	0.0034	0.23784	1403.31	42.1224	1387.11	66.5051	1375.92	53.3424	1394.01	33.6121	0.28798	2.41119
BTW05-85	13.19	0.56	0.52	0.011	0.74501	1.92308	0.0406805	0.185	0.006	0.29286	2699.18	57.098	2693.34	114.35	2698.21	87.5096	2694.57	39.4677	0.711509	1.46471
BTW05-86	9.41	0.49	0.438	0.015	0.29136	2.28311	0.0781885	0.1604	0.0098	0.18313	2341.68	80.1946	2378.81	123.87	2459.88	150.292	2368.4	44.0468	0.290401	1.85977
BTW05-87	4.68	0.2	0.313	0.011	0.65422	3.19489	0.11228	0.1083	0.0039	0.54813	1755.45	61.6932	1763.67	75.3705	1771.01	63.7762	1763.59	35.7535	0.687217	2.02731
BTW05-88	13.65	0.62	0.526	0.016	0.71222	1.90114	0.0578294	0.1902	0.0067	0.40607	2724.58	82.8769	2725.74	123.806	2743.89	96.6565	2725.85	42.7148	0.961269	1.56703
BTW05-89	4.01	0.2	0.289	0.01	0.56022	3.46021	0.11973	0.1026	0.0044	0.32466	1636.53	56.6273	1636.22	81.6072	1671.68	71.6901	1636.31	38.7998	0.988742	2.37118
BTW05-90	9.17	0.71	0.325	0.019	0.89833	3.07692	0.179882	0.1993	0.0076	0.17685	1814.1	106.055	2355.12	182.349	2820.47	107.554	1002.73	68.5828	1.91395e-105	6.83959
BTW05-91	3.83	0.17	0.283	0.0086	0.8446	3.53357	0.107381	0.0998	0.004	0.6167	1606.45	48.818	1599.07	70.9771	1620.36	64.9442	1598.69	35.7311	0.5239	2.23503
BTW05-92	3.84	0.16	0.2539	0.0079	0.63962	3.93856	0.122547	0.1088	0.0039	0.46331	1458.56	45.3824	1601.17	66.7155	1779.42	63.7844	1556.21	33.5233	6.71971e-19	2.15416
BTW05-93	2.719	0.12	0.2269	0.0065	0.4482	4.40723	0.126254	0.0863	0.0037	0.48689	1318.23	37.7634	1333.66	58.8596	1344.91	57.6613	1326.42	28.5337	0.380892	2.15117
BTW05-94	0.572	0.052	0.0644	0.0028	0.31781	15.528	0.675128	0.0635	0.0055	0.22826	402.329	17.4926	459.307	41.7552	725.019	62.7969	407.211	16.7046	0.000601405	4.10219
BTW05-95	3.9	0.23	0.2816	0.0089	0.53078	3.55114	0.112234	0.0993	0.0044	0.096249	1599.42	50.5497	1613.68	95.1659	1611.01	71.3839	1605.48	40.445	0.525408	2.51918
BTW05-96	9.74	0.62	0.373	0.02	0.89728	2.68097	0.143752	0.193	0.0069	0.27579	2043.5	109.571	2410.49	153.44	2767.9	98.9559	2656.84	35.6941	1.98275e-51	1.34348
BTW05-97	3.55	0.16	0.26	0.01	0.6859	3.84615	0.147929	0.0997	0.0041	0.52279	1489.84	57.3016	1538.43	69.3379	1618.49	66.5579	1537.28	35.7355	0.00880661	2.32459
BTW05-98	9.94	0.66	0.384	0.022	0.92023	2.60417	0.149197	0.1887	0.0067	0.16177	2094.94	120.023	2429.23	161.297	2730.86	96.9623	2677.51	33.2137	4.13543e-37	1.24047
BTW05-99	0.53	0.031	0.0696	0.0019	0.38835	14.3678	0.392225	0.0561	0.0027	0.19461	433.745	11.8407	431.81	25.2568	456.328	21.9623	433.537	11.2632	0.840671	2.59798
BTW05-100	2.882	0.13	0.2441	0.0068	0.68845	4.09668	0.114123	0.0869	0.0032	0.27729	1407.98	39.2226	1377.22	62.1228	1358.28	50.0172	1390.14	31.5793	0.0241946	2.27166
BTW05-101	3.84	0.17	0.279	0.0076	0.33998	3.58423	0.0976349	0.1002	0.004	0.53793	1586.32	43.2117	1601.17	70.8852	1627.8	64.982	1594.48	30.2883	0.485692	1.89958
BTW05-102	0.6	0.038	0.0767	0.0025	0.35296	13.0378	0.424961	0.0577	0.0036	0.19287	476.395	15.5279	477.234	30.2248	518.389	32.3432	476.542	14.3919	0.94305	3.02007
BTW05-103	2.34	0.14	0.1762	0.0086	0.79571	5.67537	0.277004	0.0979	0.0035	0.1017	1046.18	51.0622	1224.52	73.262	1584.5	56.6472	1139.09	43.9451	1.99608e-34	3.85791
BTW05-104	1.907	0.096	0.1813	0.0059	0.6091	5.51572	0.179497	0.0757	0.0031	0.27994	1074.07	34.9533	1083.54	54.5462	1087.15	44.5199	1078.25	29.4985	0.515678	2.73577
BTW05-105	4.17	0.2	0.292	0.012	0.74024	3.42466	0.140739	0.1064	0.0043	0.43871	1651.52	67.8705	1668.15	80.007	1738.63	70.2643	1670.13	38.9035	0.411643	2.32937
BTW05-106	4.21	0.18	0.2991	0.0089	0.59028	3.34336	0.0994849	0.1025	0.0037	0.5341	1686.84	50.1936	1675.97	71.6567	1669.88	60.2786	1678.47	33.9565	0.554317	2.02306
BTW05-107	4.1	0.2	0.291	0.011	0.74434	3.43643	0.129899	0.1024	0.0037	0.35613	1646.52	62.2398	1654.3	80.6977	1668.07	60.2722	1654.54	39.7942	0.671398	2.40515
BTW05-108	4.22	0.19	0.2851	0.0085	0.80791	3.50754	0.104574	0.1063	0.0036	0.20122	1617	48.2093	1677.92	75.5461	1736.91	58.8229	1666.51	37.0736	1.31835e-06	2.22463
BTW05-109	1.549	0.062	0.1605	0.0049	0.66231	6.23053	0.190216	0.0703	0.0025	0.64137	959.555	29.2948	950.095	38.0283	937.128	33.326	953.428	23.432	0.377765	2.45766
BTW05-110	9.27	0.41	0.41	0.012	0.68677	2.43902	0.0713861	0.1616	0.0058	0.49516	2214.92	64.827	2365.06	104.603	2472.47	88.7396	2348.06	40.9715	3.50482e-14	1.74491
BTW05-111	0.818	0.042	0.0991	0.0034	0.64993	10.0908	0.346204	0.058	0.0023	0.34764	609.132	20.8986	606.932	31.1628	529.762	21.0078	608.522	19.2769	0.811229	3.16782
BTW05-112	11.04	0.45	0.491	0.013	0.65739	2.03666	0.0539238	0.165	0.0061	0.56977	2575	68.1772	2526.51	102.983	2507.55	92.7035	2527.22	37.9188	0.0225585	1.50041
BTW05-113	1.646	0.09	0.1644	0.0047	0.34195	6.08273	0.173898	0.0722	0.0036	0.27448	981.182	28.0508	988.018	54.0228	991.584	49.4418	983.177	23.8638	0.700084	2.42721
BTW05-114	3.17	0.22	0.2243	0.0092	0.80654	4.45831	0.182864	0.1013	0.0039	-0.044509	1304.56	53.5083	1449.88	100.623	1648.07	63.4499	1294.22	48.4588	1.30813e-17	3.74425
BTW05-115	1.591	0.089	0.1231	0.0059	0.76936	8.12348	0.389346	0.0944	0.004	0.28993	748.382	35.8688	966.689	54.0763	1516.13	64.2428	757.609	33.8004	1.53184e-69	4.46146
BTW05-116	3.81	0.18	0.2882	0.0081	0.58011	3.46981	0.0975208	0.0964	0.0038	0.29853	1632.53	45.883	1594.86	75.3477	1555.58	61.3195	1610.08	34.5414	0.0362495	2.14533
BTW05-117	13.78	0.6	0.53	0.017	0.53226	1.88679	0.0605198	0.1922	0.0074	0.51703	2741.45	87.9334	2734.71	119.073	2761.08	106.306	2734.94	41.1587	0.824226	1.50492
BTW05-118	1.033	0.063	0.0929	0.0045	0.80687	10.7643	0.521412	0.0811	0.0039	-0.097666	572.665	27.7394	720.427	43.937	1223.87	58.8544	541.339	26.3251	1.55241e-48	4.86295
BTW05-120	5.56	0.27	0.3465	0.0096	0.32275	2.886	0.0799585	0.1178	0.0055	0.37472	1917.86	53.1356	1909.93	92.7482	1923.12	89.7889	1913.32	35.4663	0.756275	1.85365
Sample 3		Location: Bunatrahir West			Grid Coordinates: 54°18'31.6''N, -9°23'35.6''W
Zircon	207U/235Pb	2σ	206U/238Pb	2σ	ρ	238U/206Pb	2σ	207Pb/206Pb	2σ	ρ	206Pb/238U (Ma)	2σ (Ma)	207Pb/235U (Ma)	2σ (Ma)	207Pb/206Pb (Ma)	2σ (Ma)	Concordia age (Ma)	Concordia age error (Ma)	Probability
BTW6bcore1	13.59	0.56	0.522	0.015	0.50533	1.91571	0.0550491	0.1896	0.0073	0.55031	2707.66	77.8062	2721.57	112.147	2738.7	105.446	2720.32	38.7071	0.614274	1.42288
BTW6brim1	13.94	0.63	0.527	0.023	0.66521	1.89753	0.0828145	0.1882	0.0073	0.6307	2728.8	119.094	2745.64	124.086	2726.5	105.757	2748.38	40.8998	0.65589	1.48814
BTW6bcore2	1.817	0.077	0.1752	0.0045	0.39271	5.70776	0.146603	0.0739	0.0029	0.52276	1040.7	26.7303	1051.6	44.5644	1038.74	40.7624	1045.06	21.7668	0.452924	2.08284
BTW6brim2	2.317	0.11	0.2037	0.0052	0.89548	4.90918	0.12532	0.0829	0.0032	0.3798	1195.17	30.5099	1217.51	57.8013	1266.86	48.9018	1187.02	27.308	0.00383851	2.30054
BTW6bcore3	12.96	0.52	0.517	0.014	0.74795	1.93424	0.0523778	0.181	0.006	0.5348	2686.44	72.747	2676.75	107.4	2662.05	88.2449	2675.22	37.348	0.628553	1.39607
BTW6brim3	4.6	0.22	0.3057	0.0064	0.71358	3.27118	0.068484	0.1087	0.0041	-0.020877	1719.51	35.9989	1749.27	83.6606	1777.74	67.0538	1722.21	31.479	0.0364522	1.82783
BTW6bcore4	9.48	0.54	0.426	0.018	0.81007	2.34742	0.0991867	0.1634	0.0059	0.16273	2287.66	96.6617	2385.61	135.889	2491.15	89.9497	2414.64	48.7708	6.81083e-05	2.01979
BTW6brim4	12.15	0.54	0.491	0.015	0.79687	2.03666	0.0622197	0.1787	0.0058	0.3329	2575	78.666	2616.05	116.269	2640.84	85.7128	2626.59	39.9641	0.0415254	1.52152
BTW6bcore5	1.343	0.061	0.1383	0.0036	0.551	7.23066	0.188217	0.068	0.0026	0.36271	835.042	21.7365	864.53	39.2675	868.554	33.2094	841.183	19.7965	0.0103983	2.35342
BTW6bcore5b	1.361	0.069	0.1421	0.0037	0.37331	7.0373	0.183237	0.0685	0.0032	0.42238	856.526	22.3022	872.301	44.2239	883.72	41.2833	860.203	19.72	0.282491	2.29248
BTW6brim5	0.984	0.046	0.1096	0.0027	0.49185	9.12409	0.224772	0.0637	0.0026	0.28169	670.424	16.5159	695.654	32.5204	731.685	29.8647	673.813	15.4199	0.0167648	2.28846
BTW6bcore6	3.38	0.15	0.2657	0.0061	0.62256	3.76364	0.0864066	0.0929	0.0034	0.26811	1518.94	34.8721	1499.77	66.5579	1485.85	54.3799	1511.88	29.2533	0.181497	1.93489
BTW6brim6	2.43	0.13	0.1745	0.0055	0.75642	5.73066	0.180622	0.0996	0.0033	0.12966	1036.86	32.6803	1251.52	66.9538	1616.62	53.5629	986.7	29.6795	2.91464e-51	3.00795
BTW6b-7	8.59	0.36	0.3093	0.0088	0.80679	3.23311	0.0919862	0.2041	0.0064	0.42019	1737.26	49.4274	2295.5	96.2025	2859.27	89.6585	1350.24	40.1388	1.0959e-275	2.97272
BTW6b-8	4.84	0.21	0.3178	0.0088	0.59005	3.14663	0.0871314	0.1112	0.0044	0.38095	1778.98	49.2605	1791.88	77.7468	1819.12	71.9796	1787.88	34.8581	0.479521	1.94969
BTW6b-9	6.69	0.64	0.376	0.019	0.78951	2.65957	0.134393	0.1254	0.0067	-0.48561	2057.57	103.973	2071.3	198.151	2034.45	108.699	2065.92	82.0031	0.626881	3.96933
BTW6b-10	3.8	0.17	0.2096	0.0071	0.80813	4.77099	0.161613	0.1315	0.0045	0.5705	1226.69	41.5528	1592.75	71.2544	2118.09	72.4823	1088.9	37.4039	3.59325e-179	3.43501
BTW6b-11	2.913	0.13	0.2336	0.0071	0.58783	4.28082	0.130111	0.0892	0.0032	0.49999	1353.34	41.1332	1385.29	61.8221	1408.46	50.5276	1372.44	31.5546	0.0481965	2.29916
BTW6b-12	2.79	0.11	0.2309	0.0069	0.66065	4.33088	0.12942	0.0867	0.0031	0.55902	1339.21	40.0198	1352.86	53.3386	1353.84	48.407	1349.85	28.9189	0.324251	2.14237
BTW6b-13	15.6	0.76	0.559	0.019	0.72181	1.78891	0.0608037	0.206	0.0075	0.12904	2862.5	97.2941	2852.62	138.974	2874.34	104.648	2851.09	45.7545	0.72134	1.60481
BTW6b-14	2.199	0.11	0.1972	0.0086	0.39233	5.07099	0.221149	0.0811	0.0043	0.53136	1160.26	50.5996	1180.73	59.0632	1223.87	64.8907	1174.91	32.6064	0.371157	2.77521
BTW6b-15	4.19	0.19	0.2928	0.009	0.69865	3.4153	0.104979	0.1022	0.0037	0.29507	1655.51	50.8865	1672.07	75.8216	1664.46	60.2592	1668.58	36.6606	0.309916	2.19711
BTW6b-16	1.911	0.093	0.1808	0.0048	0.24452	5.53097	0.14684	0.0769	0.0035	0.42258	1071.34	28.4428	1084.93	52.799	1118.6	50.9115	1076.2	22.7181	0.45614	2.11096
BTW6b-17	0.553	0.029	0.0708	0.0019	0.2847	14.1243	0.379042	0.0569	0.0031	0.34012	440.974	11.834	446.96	23.4391	487.66	26.5684	442.089	10.8629	0.5327	2.45717
BTW6b-18	1.516	0.08	0.1555	0.0048	0.37741	6.43087	0.198509	0.0688	0.0034	0.38283	931.721	28.7605	936.864	49.4387	892.749	44.1184	933.525	24.0883	0.757417	2.58037
BTW6b-19	3.981	0.16	0.2874	0.0065	0.52444	3.47947	0.0786937	0.0985	0.0036	0.36951	1628.52	36.8316	1630.33	65.5244	1595.92	58.328	1629.42	28.4563	0.909472	1.7464
BTW6b-20	1.782	0.084	0.1743	0.0054	0.65315	5.73723	0.177746	0.0738	0.0029	0.38056	1035.76	32.0889	1038.91	48.9722	1036	40.7102	1037.17	27.4038	0.802134	2.64216
BTW6b-21	4.88	0.21	0.324	0.0069	0.60408	3.08642	0.0657293	0.1087	0.0036	0.17688	1809.23	38.53	1798.81	77.4078	1777.74	58.8765	1804.94	31.0797	0.502873	1.72192
BTW6b-22	4.28	0.18	0.2974	0.0069	0.70984	3.36247	0.078013	0.1027	0.0035	0.23353	1678.4	38.9408	1689.52	71.0547	1673.48	57.032	1683.66	31.9243	0.397413	1.89613
BTW6b-23	3.73	0.17	0.2617	0.0074	0.73674	3.82117	0.10805	0.1024	0.0036	0.31135	1498.53	42.3735	1577.83	71.9118	1668.07	58.6432	1537.02	35.208	5.35573e-09	2.29067
BTW6b-24	4.52	0.18	0.3095	0.0067	0.66055	3.23102	0.0699445	0.1057	0.0035	0.36364	1738.25	37.6292	1734.66	69.0793	1726.52	57.1696	1736.46	30.0891	0.792061	1.73278
BTW6b-25	1.656	0.074	0.1656	0.005	0.29718	6.03865	0.182326	0.0738	0.003	0.52934	987.823	29.8256	991.848	44.3217	1036	42.114	989.764	22.54	0.808307	2.27731
BTW6b-26	1.934	0.1	0.1861	0.0052	0.40685	5.37346	0.150145	0.0751	0.0038	0.19246	1100.21	30.7421	1092.92	56.5111	1071.18	54.2008	1097.76	25.7515	0.673483	2.34583
BTW6b-27	3.96	0.19	0.2883	0.0092	0.58131	3.46861	0.110687	0.0998	0.0037	0.38188	1633.03	52.1119	1626.04	78.0171	1620.36	60.0734	1628.15	36.9574	0.72261	2.2699
BTW6b-28	4.12	0.17	0.2865	0.0076	0.56122	3.4904	0.09259	0.1048	0.0039	0.47866	1624.02	43.0803	1658.28	68.4241	1710.81	63.6656	1645.3	31.6075	0.0431959	1.92108
BTW6b-29	4.43	0.2	0.3056	0.008	0.70134	3.27225	0.085661	0.1054	0.0035	0.27874	1719.02	45.0005	1717.97	77.5606	1721.3	57.159	1718.4	35.3537	0.943675	2.05736
BTW6b-30	4.429	0.17	0.3048	0.0061	0.53432	3.28084	0.0656599	0.1068	0.0035	0.37625	1715.07	34.3238	1717.78	65.9342	1745.51	57.203	1716.26	27.0862	0.856182	1.57821
BTW6b-31	1.341	0.059	0.1435	0.0032	0.46092	6.96864	0.155398	0.0678	0.0024	0.30538	864.424	19.2763	863.663	37.9986	862.446	30.5291	864.269	17.3924	0.948459	2.01239
BTW6b-32	2.55	0.17	0.1263	0.0068	0.84787	7.91766	0.426287	0.1459	0.0061	0.092446	766.723	41.2804	1286.44	85.7625	2298.42	96.0956	435.853	30.2789	1.17743e-133	6.94705
BTW6b-33	2.497	0.09	0.2191	0.0036	0.47819	4.56413	0.0749925	0.0833	0.0027	0.54696	1277.12	20.9841	1271.16	45.8169	1276.25	41.3672	1275.8	18.292	0.617165	1.43377
BTW6b-34	1.687	0.11	0.172	0.0054	0.041439	5.81395	0.182531	0.0691	0.0046	0.50603	1023.12	32.1213	1003.63	65.4412	901.727	60.0281	1016.57	24.5452	0.434435	2.41452
BTW6b-35	1.782	0.073	0.1772	0.004	0.59915	5.64334	0.127389	0.074	0.0025	0.40937	1051.66	23.7395	1038.91	42.5591	1041.47	35.1847	1048.15	21.0577	0.24794	2.00903
BTW6b-36	4.663	0.18	0.3199	0.0061	0.57003	3.12598	0.0596076	0.1064	0.0034	0.48896	1789.24	34.1181	1760.63	67.9633	1738.63	55.5578	1777.05	27.2177	0.0464231	1.53162
BTW6b-37	4.8	0.21	0.3222	0.0085	0.79699	3.10366	0.0818781	0.1072	0.0033	0.3156	1800.46	47.4983	1784.9	78.0893	1752.35	53.9437	1788.07	36.2862	0.218866	2.02935
BTW6b-38	13.56	0.7	0.441	0.015	0.77004	2.26757	0.0771284	0.2204	0.0079	0.31615	2355.12	80.106	2719.48	140.386	2983.62	106.944	2719.78	48.8022	1.16376e-68	1.79434
BTW6b-39	4.8	0.19	0.3175	0.0086	0.44087	3.14961	0.0853122	0.1099	0.004	0.66956	1777.51	48.1467	1784.9	70.6523	1797.75	65.4321	1782.68	31.0344	0.715365	1.74088
BTW6b-40	4.11	0.17	0.2802	0.0078	0.63591	3.56888	0.0993478	0.1066	0.0039	0.57336	1592.37	44.3272	1656.29	68.5084	1742.08	63.7345	1635.16	32.8357	5.18655e-05	2.00811
BTW6b-41	3.42	0.17	0.264	0.01	0.46009	3.78788	0.14348	0.0937	0.004	0.59532	1510.27	57.2074	1509	75.0088	1502.07	64.1227	1509.34	36.9187	0.957595	2.44602
BTW6b-42	1.843	0.086	0.1794	0.0054	0.6892	5.57414	0.167783	0.0733	0.0025	0.17755	1063.7	32.0176	1060.93	49.5064	1022.26	34.8656	1062.48	27.6203	0.81609	2.5996
BTW6b-43	15.57	0.7	0.56	0.018	0.66726	1.78571	0.057398	0.2017	0.0077	0.42304	2866.63	92.1416	2850.78	128.166	2840	108.419	2849.3	42.6384	0.570675	1.49645
BTW6b-44	4.82	0.2	0.32	0.0069	0.67788	3.125	0.0673828	0.1091	0.0036	0.34058	1789.73	38.591	1788.39	74.2072	1784.44	58.8817	1789.13	31.3691	0.922792	1.75331
BTW6b-45	0.547	0.026	0.07	0.0021	0.63876	14.2857	0.428571	0.0557	0.002	0.31976	436.156	13.0847	443.029	21.0581	440.43	15.8144	436.984	12.5486	0.300599	2.87163
BTW6b-46	3.745	0.15	0.2197	0.0069	0.80215	4.55166	0.142952	0.1235	0.0042	0.50528	1280.29	40.2094	1581.04	63.3262	2007.4	68.2677	1363.54	35.4749	1.60952e-160	2.60167
BTW6b-47	4.63	0.19	0.3088	0.0098	0.64161	3.23834	0.102771	0.1097	0.0037	0.57479	1734.8	55.0551	1754.69	72.0068	1794.43	60.5232	1752.99	34.1764	0.283838	1.94961
BTW6b-48	0.585	0.033	0.0723	0.0023	0.2217	13.8313	0.439999	0.0577	0.0029	0.41694	449.998	14.3153	467.67	26.3814	518.389	26.0542	454.291	12.6748	0.118816	2.79001
BTW6b-49	0.537	0.035	0.0681	0.0021	0.37751	14.6843	0.452819	0.0571	0.0035	0.28931	424.699	13.0964	436.445	28.4461	495.398	30.3659	425.892	12.4758	0.282808	2.92934
BTW6b-50	1.654	0.077	0.1683	0.0042	0.37237	5.94177	0.14828	0.0706	0.003	0.46168	1002.74	25.0238	991.083	46.1387	945.854	40.1921	999.001	21.1177	0.435075	2.11388
BTW6b-51	2.317	0.099	0.2036	0.0044	0.50129	4.91159	0.106144	0.0825	0.003	0.38738	1194.63	25.8172	1217.51	52.0212	1257.41	45.7241	1200.28	22.5309	0.0985734	1.87714
BTW6b-52	12.15	0.5	0.476	0.014	0.45094	2.10084	0.0617894	0.185	0.0068	0.63778	2509.82	73.8182	2616.05	107.657	2698.21	99.1775	2599.76	38.2856	0.000125691	1.47266
BTW6b-53	0.521	0.033	0.0648	0.0023	0.26164	15.4321	0.547744	0.0596	0.0038	0.40192	404.751	14.3662	425.819	26.9713	589.083	37.559	409.22	13.0385	0.0659878	3.18619
BTW6b-54	1.59	0.11	0.1638	0.0049	0.18274	6.10501	0.182628	0.0708	0.0048	0.34746	977.86	29.2522	966.297	66.8508	951.645	64.5183	975.033	24.6677	0.618353	2.52994
BTW6b-55	1.906	0.076	0.1846	0.004	0.57179	5.41712	0.117381	0.0747	0.0025	0.40538	1092.06	23.6632	1083.19	43.1911	1060.44	35.49	1089.55	20.8061	0.434786	1.90961
BTW6b-56	3.81	0.16	0.2557	0.0056	0.67341	3.91083	0.0856498	0.1083	0.0037	0.24973	1467.8	32.1459	1594.86	66.9757	1771.01	60.5056	1483.89	28.4773	1.96584e-21	1.9191
BTW6b-57	5.05	0.24	0.333	0.013	0.68557	3.003	0.117234	0.1107	0.0043	0.46971	1852.91	72.3357	1827.75	86.8633	1810.94	70.3435	1826.34	40.2532	0.273557	2.20404
BTW6b-58	0.535	0.026	0.0708	0.002	0.20339	14.1243	0.398991	0.0537	0.0025	0.46176	440.974	12.4569	435.122	21.1461	358.489	16.6895	439.275	10.727	0.534839	2.44199
BTW6b-59	0.634	0.031	0.0607	0.0019	0.17965	16.4745	0.515675	0.0754	0.004	0.60117	379.881	11.8908	498.585	24.3787	1079.18	57.2511	402.076	10.794	1.14162e-28	2.68457
BTW6b-60	4.74	0.24	0.322	0.013	0.70896	3.10559	0.125381	0.1079	0.0041	0.3987	1799.49	72.6502	1774.34	89.84	1764.26	67.0385	1772.96	42.4411	0.262321	2.3938
BTW6b-61	3.06	0.15	0.2524	0.0091	0.42851	3.96197	0.142844	0.0872	0.0035	0.60964	1450.84	52.3085	1422.74	69.742	1364.92	54.7846	1431.3	34.5143	0.219362	2.4114
BTW6b-62	14.46	0.61	0.545	0.02	0.74074	1.83486	0.0673344	0.1888	0.0075	0.64953	2804.34	102.912	2780.38	117.291	2731.74	108.517	2774.61	37.5735	0.426399	1.35419
BTW6b-63	4.18	0.25	0.2264	0.0089	0.042506	4.41696	0.173635	0.1321	0.0081	0.48136	1315.6	51.7176	1670.11	99.8868	2126.07	130.364	1451.91	37.3106	3.19318e-24	2.56975
BTW6b-64	3.44	0.18	0.2498	0.0065	0.62206	4.0032	0.104167	0.0978	0.0039	0.19347	1437.44	37.4035	1513.59	79.1992	1582.59	63.1095	1450.84	32.92	7.35387e-06	2.26903
BTW6b-65	4.99	0.22	0.3332	0.0089	0.66698	3.0012	0.0801641	0.1088	0.0039	0.43108	1853.87	49.5182	1817.63	80.1359	1779.42	63.7844	1827.53	35.8122	0.028984	1.9596
BTW6b-66	3.87	0.17	0.2791	0.0066	0.7287	3.58295	0.0847275	0.0996	0.0033	0.086539	1586.83	37.5244	1607.45	70.6114	1616.62	53.5629	1594.25	31.9351	0.105611	2.00314
BTW6b-67	0.974	0.062	0.1048	0.0043	0.85844	9.54198	0.391513	0.0669	0.0025	0.0097797	642.478	26.3612	690.523	43.9553	834.662	31.1907	626.721	24.5132	2.0993e-08	3.91134
BTW6b-68	1.818	0.077	0.1809	0.0047	0.59025	5.52792	0.143622	0.073	0.0026	0.41065	1071.89	27.849	1051.96	44.5552	1013.95	36.1134	1063.54	23.609	0.0991632	2.21985
BTW6b-69	3.28	0.14	0.2628	0.0069	0.55623	3.80518	0.0999076	0.0914	0.0033	0.44853	1504.15	39.4926	1476.32	63.0136	1454.95	52.531	1488.01	29.9465	0.0841327	2.01252
BTW6b-70	4.58	0.25	0.311	0.01	0.42529	3.21543	0.10339	0.1073	0.0057	0.4477	1745.63	56.1294	1745.64	95.2858	1754.06	93.1793	1745.63	39.822	0.999707	2.28124
BTW6b-71	4.16	0.28	0.245	0.012	0.78719	4.08163	0.199917	0.1237	0.0055	-0.085156	1412.64	69.1905	1666.18	112.147	2010.27	89.3813	1520.75	58.8107	2.69859e-38	3.86722
BTW6b-72	4.084	0.17	0.2649	0.0062	0.73815	3.77501	0.0883543	0.1122	0.0036	0.35193	1514.86	35.4554	1651.11	68.729	1835.35	58.8883	1538.31	31.1965	2.21108e-28	2.02798
BTW6b-73	3.87	0.17	0.2827	0.0077	0.4981	3.53732	0.0963472	0.1018	0.0037	0.48375	1604.95	43.7145	1607.45	70.6114	1657.2	60.2321	1606.41	31.9469	0.893195	1.98871
BTW6b-74	5.02	0.21	0.3294	0.0064	0.7693	3.03582	0.0589838	0.1119	0.0035	0.17314	1835.47	35.6619	1822.7	76.2485	1830.5	57.2543	1832.38	30.5523	0.263844	1.66736
BTW6b-75	4.81	0.2	0.3084	0.0061	0.57893	3.24254	0.0641359	0.1133	0.0037	0.34076	1732.83	34.2745	1786.65	74.2889	1853.01	60.513	1748.17	28.6954	0.000420585	1.64145
BTW6b-76	1.727	0.1	0.1748	0.0063	0.47435	5.72082	0.206185	0.0726	0.0036	0.20696	1038.5	37.4289	1018.63	58.9829	1002.81	49.726	1029.77	30.6004	0.279916	2.97159
BTW6b-77	4.087	0.16	0.2847	0.0062	0.51013	3.51247	0.0764921	0.1057	0.0036	0.4556	1614.99	35.1701	1651.71	64.6621	1726.52	58.8031	1631.64	27.5931	0.0191617	1.69113
BTW6b-78	1.758	0.073	0.1766	0.0037	0.35315	5.66251	0.118637	0.0731	0.0028	0.48364	1048.37	21.9648	1030.11	42.7748	1016.73	38.9444	1042.9	18.5731	0.17998	1.7809
BTW6b-79	4.28	0.19	0.3048	0.0091	0.58054	3.28084	0.0979516	0.1007	0.0039	0.51739	1715.07	51.2044	1689.52	75.0022	1637.05	63.4011	1696.02	34.9982	0.179663	2.06355
BTW6b-80	4.06	0.22	0.2828	0.0073	0.41039	3.53607	0.0912776	0.1035	0.0049	0.24656	1605.45	41.4419	1646.31	89.2088	1687.81	79.9061	1618.81	33.5698	0.0675951	2.07373
BTW6b-81	13.45	0.54	0.526	0.014	0.55116	1.90114	0.0506007	0.1835	0.0064	0.43544	2724.58	72.5172	2711.78	108.874	2684.76	93.6374	2712.81	37.6946	0.606354	1.3895
BTW6b-82	11.64	0.49	0.4298	0.009	0.72327	2.32666	0.0487203	0.1959	0.0067	0.38455	2304.82	48.2628	2575.89	108.435	2792.34	95.5011	2354.98	39.8505	1.06573e-67	1.69218
BTW6b-83	3.67	0.19	0.2642	0.0088	0.5169	3.78501	0.126072	0.1009	0.0037	0.13558	1511.29	50.3383	1564.87	81.0149	1640.73	60.1656	1541.3	37.7872	0.0119351	2.45165
BTW6b-84	9.56	0.55	0.309	0.015	0.96647	3.23625	0.157099	0.2238	0.007	0.36607	1735.78	84.2614	2393.33	137.692	3008.23	94.0913	489.763	30.6135	1.16662e-233	6.25068
BTW6b-85	3.926	0.16	0.2809	0.0087	0.67958	3.55999	0.110259	0.1018	0.0038	0.66262	1595.89	49.4278	1619.06	65.9829	1657.2	61.86	1616.55	32.8768	0.150745	2.03377
BTW6b-86	4.12	0.19	0.267	0.011	0.79304	3.74532	0.154302	0.1107	0.0038	0.3202	1525.56	62.8506	1658.28	76.474	1810.94	62.164	1686.41	35.941	1.0481e-14	2.13121
BTW6b-87	5.16	0.21	0.3313	0.0096	0.80906	3.01841	0.0874638	0.1127	0.0036	0.54635	1844.68	53.4528	1846.04	75.1297	1843.4	58.8842	1846.23	34.4033	0.920875	1.86343
BTW6b-88	0.518	0.022	0.0677	0.0015	0.32236	14.771	0.327276	0.0551	0.0023	0.41624	422.284	9.35637	423.814	17.9998	416.283	17.3766	422.564	8.65301	0.833821	2.04774
BTW6b-89	3.318	0.14	0.259	0.0062	0.62773	3.861	0.0924256	0.0941	0.0034	0.28869	1484.72	35.5416	1485.29	62.6707	1510.12	54.5634	1484.98	29.1422	0.967381	1.96246
BTW6b-90	0.516	0.024	0.0685	0.002	0.35145	14.5985	0.426235	0.0552	0.0026	0.42611	427.112	12.4704	422.476	19.65	420.333	19.7983	425.762	11.0906	0.570415	2.60489
BTW6b-91	5.01	0.21	0.325	0.0066	0.4997	3.07692	0.0624852	0.1111	0.0039	0.42116	1814.1	36.8402	1821.01	76.3299	1817.49	63.8002	1816.85	29.1237	0.684049	1.60298
BTW6b-92	3.585	0.15	0.2349	0.0076	0.65187	4.25713	0.137736	0.1105	0.0042	0.6339	1360.13	44.0059	1546.22	64.6952	1807.65	68.7071	1479.71	33.5658	3.61923e-33	2.26841
BTW6b-93	2.728	0.13	0.1659	0.0066	0.84982	6.02773	0.239801	0.1175	0.0038	0.25982	989.482	39.3645	1336.11	63.6711	1918.54	62.0465	753.586	34.2633	5.00713e-196	4.54671
BTW6b-94	3.01	0.15	0.2458	0.0074	0.74132	4.06835	0.122481	0.0896	0.0036	-0.018333	1416.78	42.6532	1410.16	70.2735	1417.02	56.9338	1413.32	35.5341	0.628919	2.51423
BTW6b-95	1.825	0.11	0.1834	0.0066	0.56456	5.45256	0.196221	0.0724	0.0036	0.18818	1085.52	39.0646	1054.48	63.5579	997.206	49.5848	1072.74	32.9741	0.0776992	3.07383
BTW6b-96	3.077	0.13	0.2496	0.006	0.35018	4.00641	0.0963079	0.0894	0.0034	0.47762	1436.41	34.5291	1426.98	60.2884	1412.74	53.7285	1431.99	25.9397	0.601026	1.81145
BTW6b-97	4.84	0.24	0.319	0.015	0.61687	3.1348	0.147404	0.1073	0.005	0.59093	1784.84	83.9268	1791.88	88.8534	1754.06	81.7362	1792.18	41.6408	0.807608	2.32347
BTW6b-98	13.96	0.54	0.534	0.013	0.47022	1.87266	0.0455891	0.1865	0.0064	0.61125	2758.28	67.1492	2747	106.259	2711.54	93.0502	2748.83	35.6939	0.648167	1.29851
BTW6b-99	0.523	0.028	0.0685	0.0021	0.47429	14.5985	0.447547	0.0558	0.0026	0.35291	427.112	13.094	427.153	22.8686	444.419	20.7077	427.119	12.3414	0.996108	2.88945
BTW6b-100	0.513	0.041	0.0665	0.0025	0.065037	15.0376	0.565323	0.0559	0.0044	0.34285	415.035	15.6028	420.464	33.6044	448.399	35.2944	416.202	13.6058	0.722395	3.26904
BTW6b-101	2.82	0.13	0.2357	0.0078	0.7204	4.24268	0.140403	0.0867	0.0032	0.4599	1364.3	45.1488	1360.87	62.735	1353.84	49.9686	1361.62	33.9576	0.810798	2.49391
BTW6b-102	3.27	0.15	0.2563	0.0079	0.68492	3.90168	0.120262	0.0925	0.0034	0.31772	1470.88	45.3374	1473.94	67.6121	1477.67	54.3144	1473.02	34.4751	0.841359	2.34044
BTW6b-103	10.93	0.94	0.371	0.032	0.92507	2.69542	0.232489	0.2161	0.0095	0.39788	2034.1	175.448	2517.19	216.483	2951.86	129.767	2832.16	36.228	8.25502e-32	1.27916
BTW6b-104	5.07	0.2	0.3325	0.0069	0.5221	3.00752	0.0624117	0.1102	0.0038	0.47494	1850.49	38.4011	1831.1	72.2327	1802.71	62.1623	1840.64	29.0379	0.23437	1.5776
BTW6b-105	2.335	0.11	0.2091	0.0077	0.85227	4.7824	0.176109	0.0799	0.0026	0.30873	1224.02	45.0739	1223	57.6146	1194.52	38.8705	1222.89	33.4132	0.924509	2.73231
BTW6b-106	2.154	0.084	0.1989	0.0042	0.49913	5.02765	0.106165	0.0777	0.0027	0.47301	1169.41	24.6934	1166.34	45.4841	1139.21	39.5866	1168.41	21.0442	0.807069	1.8011
BTW6b-107	1.407	0.11	0.1268	0.006	0.93328	7.88644	0.373175	0.0816	0.0034	-0.35696	769.584	36.4157	891.893	69.7287	1235.93	51.4972	644.342	25.3383	1.11229e-25	3.93243
BTW6b-108	3.395	0.14	0.2656	0.0062	0.61136	3.76506	0.0878892	0.0941	0.0033	0.34007	1518.43	35.4453	1503.24	61.9893	1510.12	52.9586	1511.15	28.5877	0.280343	1.89179
BTW6b-109	0.5	0.027	0.0649	0.0015	0.3409	15.4083	0.356125	0.0557	0.0026	0.25634	405.356	9.36879	411.702	22.2319	440.43	20.5587	405.887	8.96159	0.467332	2.20791
BTW6b-110	4.87	0.21	0.3248	0.0085	0.70566	3.07882	0.0805725	0.1073	0.0037	0.33705	1813.13	47.4495	1797.08	77.4922	1754.06	60.4848	1801.51	35.2005	0.28731	1.95395
BTW6b-111	4.02	0.17	0.2842	0.0076	0.62417	3.51865	0.0940948	0.1011	0.0038	0.32988	1612.48	43.1205	1638.25	69.2792	1644.41	61.8075	1628.52	32.5727	0.103509	2.00014
BTW6b-112	4.96	0.24	0.329	0.012	0.80824	3.03951	0.110864	0.1091	0.004	0.37189	1833.53	66.8766	1812.53	87.7031	1784.44	65.4241	1808.18	40.4195	0.228634	2.23537
BTW6b-113	0.606	0.04	0.0763	0.0028	0.29593	13.1062	0.48096	0.0569	0.0034	0.2998	474	17.3945	481.034	31.7514	487.66	29.1396	475.618	15.6699	0.587467	3.29464
BTW6b-114	0.562	0.078	0.0719	0.0056	0.95912	13.9082	1.08325	0.0555	0.004	-0.70763	447.592	34.8612	452.827	62.8479	432.421	31.1655	441.456	23.0637	0.617501	5.22446
BTW6b-115	3.327	0.14	0.2224	0.0061	0.6742	4.4964	0.123328	0.1094	0.0036	0.44866	1294.54	35.5068	1487.41	62.5901	1789.45	58.8849	1345.71	31.0947	1.1927e-45	2.31065
BTW6b-116	3.72	0.23	0.27	0.014	0.83291	3.7037	0.192044	0.1002	0.0039	0.24388	1540.8	79.8934	1575.68	97.4211	1627.8	63.3574	1586.03	47.5043	0.0841126	2.99518
BTW6b-117	0.587	0.039	0.0756	0.0022	0.27578	13.2275	0.384928	0.0572	0.0038	0.25782	469.806	13.6716	468.95	31.1568	499.252	33.1671	469.69	12.7512	0.944952	2.7148
BTW6b-118	13.77	0.57	0.53	0.012	0.63358	1.88679	0.0427198	0.189	0.0064	0.2699	2741.45	62.0706	2734.02	113.173	2733.48	92.5623	2735.32	38.5123	0.708582	1.40796
BTW6b-119	0.611	0.043	0.0773	0.0025	0.37745	12.9366	0.41839	0.0558	0.0032	0.15172	479.987	15.5235	484.191	34.0756	444.419	25.4864	480.437	14.7058	0.742395	3.06092
BTW6b-120	5.23	0.2	0.3339	0.0059	0.58245	2.99491	0.0529199	0.1123	0.0033	0.46552	1857.26	32.8177	1857.52	71.0332	1836.97	53.9803	1857.35	26.8328	0.985222	1.44468
BTW6b-121	9.18	0.4	0.438	0.011	0.7199	2.28311	0.0573383	0.1508	0.0052	0.39376	2341.68	58.8093	2356.12	102.663	2355.02	81.2075	2353.91	39.6338	0.402359	1.68374
BTW6b-122	4.95	0.22	0.3293	0.0091	0.75527	3.03674	0.0839185	0.1099	0.004	0.16031	1834.99	50.7087	1810.83	80.4811	1797.75	65.4321	1815.01	37.0466	0.0985587	2.04113
BTW6b-123	4.27	0.23	0.292	0.01	0.71856	3.42466	0.117283	0.1044	0.0041	0.2272	1651.52	56.5588	1687.6	90.901	1703.77	66.9105	1676.14	43.3404	0.0434065	2.58573
BTW6b-124	4.5	0.19	0.3115	0.0096	0.8422	3.21027	0.0989362	0.1031	0.0032	0.34922	1748.08	53.8735	1730.97	73.0855	1680.66	52.1642	1726.81	34.6504	0.186477	2.00661
BTW6b-125	4.72	0.19	0.3193	0.0066	0.20351	3.13185	0.064736	0.108	0.0043	0.63441	1786.31	36.9234	1770.8	71.2821	1765.95	70.3109	1778.92	25.486	0.455498	1.43267
BTW6b-126	6.89	0.27	0.3869	0.0082	0.59546	2.58465	0.0547793	0.1288	0.0042	0.49885	2108.44	44.6864	2097.37	82.1902	2081.66	67.8801	2101.59	32.2633	0.501091	1.53519
Sample 4		Location: Bunatrahir West			Grid Coordinates: 54°18'31.6''N, -9°23'35.6''W
Zircon	207U/235Pb	2σ	206U/238Pb	2σ	ρ	238U/206Pb	2σ	207Pb/206Pb	2σ	ρ	206Pb/238U (Ma)	2σ (Ma)	207Pb/235U (Ma)	2σ (Ma)	207Pb/206Pb (Ma)	2σ (Ma)	Concordia age (Ma)	Concordia age error (Ma)	Probability
BTW08core1	4.41	0.25	0.294	0.012	0.71839	3.40136	0.138831	0.1098	0.0046	0.33913	1661.49	67.8158	1714.22	97.178	1796.09	75.2461	1707.64	46.9379	0.0113496	2.7487
BTW08rim1	3.76	0.17	0.2474	0.0085	0.83277	4.04204	0.138874	0.1126	0.0039	0.65215	1425.05	48.961	1584.25	71.6283	1841.8	63.7923	1575.82	36.5437	4.52473e-40	2.31903
BTW08core2	13.89	0.69	0.532	0.021	0.75551	1.8797	0.0741987	0.191	0.0068	0.33647	2749.87	108.548	2742.23	136.223	2750.79	97.9339	2740.34	44.6298	0.802866	1.62862
BTW08rim2	13.62	0.89	0.509	0.027	0.45802	1.96464	0.104215	0.196	0.01	0.50303	2652.36	140.695	2723.65	177.977	2793.17	142.509	2719.52	61.7779	0.163902	2.27165
BTW08core3	10.32	0.74	0.358	0.023	0.60935	2.7933	0.179458	0.205	0.014	0.58671	1972.69	126.737	2463.9	176.675	2866.42	195.756	2431.75	68.2863	5.99126e-32	2.80811
BTW08rim3	10.07	0.47	0.435	0.014	0.58259	2.29885	0.073986	0.1675	0.0079	0.57848	2328.22	74.9312	2441.22	113.94	2532.82	119.458	2426.85	43.2298	1.01789e-05	1.78132
BTW08core4	4.75	0.22	0.318	0.011	0.9025	3.14465	0.108777	0.1094	0.0036	0.77089	1779.95	61.5708	1776.11	82.2618	1789.45	58.8849	1773.82	35.9415	0.759455	2.02622
BTW08rim4	3.37	0.15	0.2159	0.0068	0.71261	4.63177	0.145883	0.1111	0.0041	0.5136	1260.17	39.6905	1497.45	66.652	1817.49	67.072	1324.51	34.8935	4.76571e-65	2.63445
BTW08core5	1.72	0.07	0.1732	0.0051	0.65937	5.77367	0.17001	0.0715	0.0025	0.47651	1029.72	30.3208	1016.02	41.3498	971.742	33.977	1021.36	24.4951	0.221477	2.39829
BTW08rim5	0.927	0.055	0.071	0.0026	0.47982	14.0845	0.515771	0.0957	0.0052	0.33413	442.178	16.1924	666.055	39.5178	1541.89	83.7808	435.268	15.6418	4.27999e-56	3.59361
BTW08core6	5.3	0.27	0.337	0.01	0.59208	2.96736	0.0880522	0.1128	0.0047	0.23266	1872.22	55.5555	1868.86	95.2062	1845.01	76.8754	1870.12	40.5809	0.871842	2.16996
BTW08rim6	5.31	0.31	0.344	0.018	0.79385	2.90698	0.152109	0.1141	0.005	0.54305	1905.88	99.7265	1870.47	109.199	1865.72	81.7579	1859.92	47.5429	0.205092	2.55618
BTW08core7	0.524	0.026	0.0692	0.0018	0.44119	14.4509	0.37589	0.0535	0.0024	0.3204	431.334	11.2197	427.82	21.2277	350.061	15.7037	430.843	10.6246	0.657523	2.46601
BTW08rim7	1.09	0.058	0.0643	0.002	0.46943	15.5521	0.483736	0.1226	0.0055	0.35299	401.723	12.4953	748.504	39.8286	1994.4	89.4717	375.008	11.9433	4.36629e-119	3.18482
BTW08-8	4	0.2	0.2513	0.0089	0.62472	3.97931	0.14093	0.1127	0.0047	0.35526	1445.18	51.1821	1634.2	81.7098	1843.4	76.8767	1547.02	40.2711	3.45064e-23	2.60313
BTW08-9	3.1	0.16	0.2076	0.0086	0.87161	4.81696	0.199546	0.1092	0.0037	0.4401	1216.02	50.3746	1432.69	73.9454	1786.11	60.5184	1390.1	41.0816	5.13546e-85	2.95529
BTW08-10	4.86	0.21	0.3237	0.0098	0.66415	3.08928	0.0935278	0.1085	0.0041	0.45842	1807.77	54.7302	1795.35	77.5768	1774.38	67.0504	1796.94	36.0357	0.490159	2.00539
BTW08-11	4.14	0.23	0.285	0.012	0.5195	3.50877	0.147738	0.1084	0.0047	0.57227	1616.49	68.0629	1662.24	92.3464	1772.7	76.8606	1651.33	44.1125	0.0861305	2.67133
BTW08-12	4.1	0.18	0.2844	0.0076	0.37475	3.51617	0.0939625	0.1033	0.0044	0.50479	1613.48	43.117	1654.3	72.6279	1684.24	71.7393	1635.32	30.8689	0.04941	1.88763
BTW08-13	1.66	0.079	0.1621	0.0057	0.69787	6.16903	0.216925	0.0751	0.003	0.40165	968.437	34.0536	993.376	47.2751	1071.18	42.7901	982.362	28.5471	0.0383899	2.90596
BTW08-14	1.532	0.091	0.15	0.015	0.4926	6.66667	0.666667	0.0757	0.0069	0.85283	900.963	90.0963	943.301	56.0316	1087.15	99.0927	944.663	36.3681	0.246631	3.84985
BTW08-15	4.48	0.24	0.305	0.012	0.58336	3.27869	0.128998	0.1037	0.0045	0.34126	1716.06	67.5169	1727.27	92.5325	1691.37	73.3961	1725.2	43.6213	0.647916	2.52848
BTW08-16	5.21	0.24	0.322	0.014	0.61568	3.10559	0.135026	0.1183	0.0057	0.56071	1799.49	78.2387	1854.25	85.4166	1930.7	93.0263	1856.12	39.1269	0.0410994	2.10799
BTW08-17	13.76	0.55	0.524	0.017	0.54427	1.9084	0.0619136	0.1899	0.0081	0.71674	2716.12	88.1185	2733.33	109.254	2741.3	116.927	2733.55	37.8205	0.56788	1.38357
BTW08-18	3.54	0.16	0.2775	0.007	0.63161	3.6036	0.0909017	0.0931	0.0034	0.34686	1578.76	39.8246	1536.2	69.4328	1489.92	54.4118	1556.98	31.8363	0.00508872	2.04475
BTW08-19	4.66	0.21	0.308	0.01	0.83646	3.24675	0.105414	0.1107	0.0037	0.30838	1730.86	56.1967	1760.09	79.3173	1810.94	60.5281	1765.35	37.1598	0.031406	2.10496
BTW08-20	1.676	0.076	0.1676	0.0051	0.2179	5.96659	0.181561	0.073	0.0032	0.56867	998.874	30.3953	999.465	45.3218	1013.95	44.4472	999.161	22.2352	0.973556	2.22539
BTW08-21	14.72	0.7	0.525	0.019	0.51738	1.90476	0.0689342	0.1999	0.0086	0.44829	2720.35	98.4508	2797.31	133.024	2825.38	121.552	2794.12	45.2673	0.0245362	1.6201
BTW08-22	4.67	0.23	0.306	0.01	0.78765	3.26797	0.106797	0.111	0.0039	0.18158	1720.99	56.2416	1761.88	86.7736	1815.85	63.8002	1756.9	41.2237	0.00720295	2.34639
BTW08-23	4.24	0.18	0.2982	0.007	0.47977	3.35345	0.0787196	0.1046	0.0038	0.48729	1682.38	39.4924	1681.8	71.3972	1707.29	62.024	1682.09	29.9468	0.974126	1.78033
BTW08-24	1.61	0.26	0.1548	0.009	0.27255	6.45995	0.375578	0.074	0.012	0.16004	927.814	53.9427	974.108	157.309	1041.47	168.887	932.551	49.1131	0.362828	5.26653
BTW08-25	4.06	0.25	0.272	0.014	0.74458	3.67647	0.18923	0.1083	0.0041	0.081402	1550.95	79.8281	1646.31	101.374	1771.01	67.0467	1650.81	49.896	5.05153e-05	3.02252
BTW08-26	5.32	0.28	0.318	0.015	0.58916	3.14465	0.148333	0.1173	0.0064	0.53665	1779.95	83.9601	1872.08	98.5306	1915.49	104.511	1869.09	45.0774	0.00176143	2.41174
BTW08-27	12.67	0.56	0.481	0.015	0.62014	2.079	0.0648337	0.1916	0.0069	0.47676	2531.62	78.9486	2655.43	117.367	2755.94	99.2485	2651.36	41.7296	1.07374e-06	1.5739
BTW08-28	4.12	0.17	0.2806	0.0089	0.41564	3.56379	0.113035	0.1062	0.0043	0.56049	1594.38	50.5702	1658.28	68.4241	1735.18	70.2569	1640.05	31.964	0.00326889	1.94897
BTW08-29	3.94	0.22	0.266	0.014	0.81533	3.7594	0.197863	0.1093	0.0047	0.46882	1520.47	80.0245	1621.94	90.565	1787.78	76.8761	1654.48	41.6503	2.20515e-06	2.51742
BTW08-30	4.06	0.25	0.268	0.012	0.6303	3.73134	0.167075	0.1114	0.0057	0.19364	1530.64	68.5362	1646.31	101.374	1822.38	93.2457	1611.76	49.7436	2.09748e-06	3.0863
BTW08-31	4.04	0.22	0.279	0.015	0.56856	3.58423	0.1927	0.1034	0.005	0.60672	1586.32	85.2862	1642.29	89.4315	1686.03	81.5294	1641.15	44.3541	0.0708038	2.70262
BTW08-32	4.54	0.3	0.288	0.018	0.62271	3.47222	0.217014	0.1105	0.006	0.56829	1631.53	101.97	1738.33	114.868	1807.65	98.1529	1738.58	54.971	0.00224687	3.16184
BTW08-33	3.93	0.2	0.2575	0.0081	0.43443	3.8835	0.12216	0.1104	0.0051	0.3552	1477.04	46.4622	1619.88	82.4367	1806	83.4295	1539.9	36.1513	1.71433e-10	2.34763
BTW08-34	3.44	0.21	0.244	0.012	0.79149	4.09836	0.201559	0.1009	0.0044	-0.22721	1407.46	69.2193	1513.59	92.3991	1640.73	71.5482	1515.23	47.9436	1.79548e-08	3.16412
BTW08-35	4.63	0.2	0.292	0.012	0.86472	3.42466	0.140739	0.1148	0.004	0.60383	1651.52	67.8705	1754.69	75.7967	1876.75	65.3919	1806.81	29.9678	9.6274e-10	1.6586
BTW08-36	1.954	0.089	0.1898	0.0049	0.38493	5.2687	0.13602	0.0758	0.0034	0.40946	1120.29	28.9222	1099.82	50.0943	1089.79	48.8825	1112.2	23.4292	0.197329	2.10656
BTW08-37	1.847	0.1	0.1844	0.0071	0.92218	5.42299	0.208803	0.0723	0.003	0.18405	1090.97	42.0058	1062.36	57.5182	994.397	41.2613	1061.84	35.6822	0.000133748	3.36041
BTW08-38	3.78	0.22	0.2876	0.0082	0.41819	3.47705	0.0991371	0.0989	0.0051	0.29749	1629.52	46.4607	1588.51	92.4528	1603.48	82.6871	1612.75	36.3282	0.0826418	2.25255
BTW08-40	0.535	0.033	0.0665	0.0021	0.36152	15.0376	0.474871	0.0581	0.0035	0.38425	415.035	13.1064	435.122	26.8393	533.535	32.1407	417.692	12.3785	0.0565008	2.96355
BTW08-41	1.797	0.086	0.1764	0.0052	0.57975	5.66893	0.167111	0.0733	0.003	0.37682	1047.28	30.8721	1044.37	49.981	1022.26	41.8387	1046.13	26.3624	0.832307	2.51999
BTW08-42	5.44	0.39	0.266	0.013	0.56159	3.7594	0.18373	0.1481	0.01	0.34754	1520.47	74.3085	1891.18	135.581	2324.1	156.928	1637.12	61.9844	3.98029e-32	3.78619
BTW08-43	14.28	0.88	0.534	0.022	0.72871	1.87266	0.0771508	0.1891	0.0085	0.80629	2758.28	113.637	2768.49	170.607	2734.35	122.908	2769.78	57.8391	0.749349	2.08822
BTW08-44	1.639	0.1	0.161	0.0072	0.51072	6.21118	0.277767	0.0744	0.0038	0.3277	962.332	43.036	985.328	60.1176	1052.34	53.7484	974.47	34.2254	0.237106	3.5122
BTW08-45	3.99	0.25	0.257	0.015	0.91128	3.89105	0.227104	0.1116	0.0041	0.48216	1474.47	86.0589	1632.16	102.266	1825.63	67.0708	1751.04	36.6894	2.42322e-17	2.09529
BTW08-46	3.13	0.14	0.2393	0.0072	0.5259	4.17885	0.125732	0.0977	0.0042	0.27283	1383.06	41.6131	1440.09	64.4132	1580.68	67.9514	1415.07	31.6209	0.00119979	2.23458
BTW08-47	3.33	0.25	0.254	0.016	0.80253	3.93701	0.248001	0.0996	0.0054	0.19181	1459.07	91.91	1488.11	111.72	1616.62	87.6483	1493.21	57.6849	0.240566	3.86316
BTW08-48	1.49	0.13	0.1559	0.0058	0.60078	6.41437	0.238636	0.0661	0.0042	-0.028261	933.952	34.7461	926.316	80.8196	809.544	51.4385	933.85	32.342	0.71762	3.4633
BTW08-49	4.8	0.22	0.3217	0.0094	0.72444	3.10849	0.0908293	0.109	0.0038	0.34717	1798.03	52.5379	1784.9	81.8079	1782.77	62.1516	1787.43	37.9201	0.41283	2.12149
BTW08-50	4.84	0.21	0.324	0.011	0.58791	3.08642	0.104786	0.108	0.0041	0.52309	1809.23	61.4246	1791.88	77.7468	1765.95	67.0406	1793.5	36.2249	0.426565	2.01979
BTW08-51	0.63	0.11	0.0799	0.0044	0.32374	12.5156	0.689222	0.0577	0.0091	0.064741	495.526	27.288	496.096	86.6199	518.389	81.7563	495.54	26.214	0.986001	5.28998
BTW08-52	3.4	0.22	0.259	0.013	0.67728	3.861	0.193796	0.0948	0.0049	0.47558	1484.72	74.5228	1504.4	97.3433	1524.1	78.7775	1501.95	50.5207	0.424363	3.36367
BTW08-53	15.17	0.67	0.558	0.021	0.6443	1.79211	0.0674452	0.197	0.0078	0.6332	2858.36	107.573	2825.97	124.812	2801.5	110.922	2821.84	41.3388	0.341446	1.46496
BTW08-54	6.78	0.31	0.356	0.01	0.591	2.80899	0.0789042	0.1386	0.0051	0.24582	1963.19	55.1457	2083.12	95.2457	2209.79	81.3125	2039.33	39.4612	2.894e-09	1.93501
BTW08-55	1.926	0.093	0.1862	0.0059	0.44801	5.37057	0.170174	0.0745	0.0031	0.47435	1100.76	34.879	1090.15	52.6397	1055.04	43.9011	1095.47	27.311	0.529865	2.49309
BTW08-56	4.23	0.21	0.3041	0.0081	0.73111	3.28839	0.0875895	0.1004	0.0038	0.07146	1711.61	45.5903	1679.86	83.3974	1631.51	61.7502	1695.8	37.3414	0.0315543	2.20199
BTW08-57	0.532	0.033	0.0715	0.0037	0.2818	13.986	0.723752	0.055	0.0036	0.37797	445.186	23.0376	433.136	26.8675	412.223	26.9819	438.967	17.6187	0.361611	4.01368
BTW08-58	4.87	0.19	0.3246	0.0069	0.25846	3.08071	0.0654865	0.1102	0.0041	0.67508	1812.15	38.5209	1797.08	70.112	1802.71	67.0699	1804.33	26.2665	0.455578	1.45575
BTW08-59	4.62	0.2	0.3168	0.0077	0.74344	3.15657	0.0767221	0.1073	0.0035	0.18601	1774.08	43.1201	1752.89	75.8826	1754.06	57.2154	1761.35	34.2568	0.109052	1.94492
BTW08-60	5.02	0.3	0.326	0.013	0.69861	3.06748	0.122323	0.1116	0.0049	0.20846	1818.96	72.5354	1822.7	108.926	1825.63	80.1578	1822.11	50.1144	0.870021	2.75035
BTW08-61	4.75	0.19	0.319	0.007	0.67897	3.1348	0.0687886	0.1076	0.0036	0.44302	1784.84	39.1658	1776.11	71.0443	1759.17	58.8569	1780.15	30.9774	0.519664	1.74016
BTW08-62	3.228	0.14	0.2549	0.0058	0.48925	3.92311	0.0892665	0.0913	0.0036	0.31791	1463.7	33.305	1463.91	63.4904	1452.87	57.2872	1463.78	27.1194	0.989551	1.8527
BTW08-63	5.04	0.22	0.3301	0.0095	0.80525	3.02939	0.0871832	0.1118	0.0037	0.38602	1838.87	52.921	1826.07	79.7094	1828.88	60.5265	1825.97	36.9872	0.348975	2.02563
BTW08-64	3.69	0.23	0.28	0.015	0.72346	3.57143	0.191327	0.0939	0.0044	0.43325	1591.36	85.2516	1569.21	97.8096	1506.1	70.5736	1567.22	49.6695	0.398472	3.16928
BTW08-65	4.9	0.29	0.321	0.017	0.77733	3.11526	0.164983	0.1097	0.0047	0.61274	1794.61	95.0417	1802.26	106.664	1794.43	76.8809	1804.15	47.9743	0.777646	2.6591
BTW08-66	2.771	0.12	0.2325	0.0058	0.5584	4.30108	0.107296	0.0872	0.0031	0.45306	1347.59	33.6173	1347.76	58.3656	1364.92	48.5235	1347.66	27.5753	0.990773	2.04616
BTW08-67	0.488	0.059	0.0632	0.0049	0.40235	15.8228	1.22677	0.0554	0.0062	0.2314	395.057	30.6294	403.547	48.7895	428.402	47.9439	397.235	27.9325	0.66607	7.03173
BTW08-68	4.31	0.2	0.2809	0.0083	0.5744	3.55999	0.10519	0.1118	0.0043	0.45893	1595.89	47.1553	1695.28	78.6671	1828.88	70.3416	1650.38	36.0752	9.71024e-08	2.18587
BTW08-69	2.005	0.095	0.1873	0.0055	0.5217	5.33903	0.156779	0.0778	0.0035	0.50381	1106.73	32.4988	1117.2	52.9348	1141.77	51.365	1111.12	26.9903	0.49107	2.42911
BTW08-70	4.58	0.2	0.3117	0.0091	0.64763	3.20821	0.0936629	0.1065	0.0038	0.50309	1749.07	51.0636	1745.64	76.2286	1740.36	62.0972	1746.39	35.5408	0.844002	2.0351
BTW08-71	4.07	0.18	0.3041	0.009	0.60132	3.28839	0.0973217	0.0991	0.0036	0.56346	1711.61	50.6559	1648.31	72.8984	1607.25	58.3864	1662.67	34.5634	0.000578467	2.07879
BTW08-72	8.24	0.38	0.301	0.011	0.86999	3.32226	0.121412	0.1986	0.0064	0.58389	1696.27	61.9898	2257.75	104.119	2814.73	90.7062	984.499	44.7761	9.4211e-292	4.54811
BTW08-73	4.2	0.17	0.2609	0.0074	0.56524	3.83289	0.108714	0.1188	0.0044	0.49939	1494.44	42.3875	1674.02	67.758	1938.25	71.7872	1593.85	32.3381	1.46428e-26	2.02893
BTW08-74	1.847	0.097	0.18	0.0049	0.43137	5.55556	0.151235	0.0738	0.0035	0.26061	1066.97	29.0454	1062.36	55.7926	1036	49.133	1065.65	25.0075	0.781978	2.34669
BTW08-75	1.865	0.076	0.1799	0.0042	0.55914	5.55864	0.129774	0.0758	0.0026	0.45462	1066.43	24.8972	1068.76	43.5527	1089.79	37.3808	1067.18	21.6463	0.843971	2.02837
BTW08-76	4.11	0.2	0.238	0.01	0.69752	4.20168	0.176541	0.1239	0.0059	0.30457	1376.29	57.8274	1656.29	80.5982	2013.13	95.8635	1597.02	41.3508	9.27392e-52	2.58924
BTW08-77	4.89	0.28	0.311	0.013	0.7034	3.21543	0.134407	0.1165	0.005	0.37462	1745.63	72.9683	1800.53	103.098	1903.2	81.6824	1795.5	48.3296	0.0155749	2.69171
BTW08-78	1.857	0.12	0.1816	0.0074	0.57604	5.50661	0.224388	0.0752	0.0038	0.20575	1075.71	43.834	1065.92	68.8802	1073.85	54.2638	1071.38	36.6967	0.608529	3.42517
BTW08-79	4.74	0.22	0.316	0.015	0.66338	3.16456	0.150216	0.1083	0.0047	0.73576	1770.16	84.0268	1774.34	82.3534	1771.01	76.8584	1774.85	38.2919	0.881099	2.15747
BTW08-80	0.526	0.024	0.0674	0.0014	0.40096	14.8368	0.308183	0.056	0.0021	0.33994	420.472	8.73385	429.152	19.5811	452.368	16.9638	421.138	8.37749	0.241689	1.98925
BTW08-81	1.92	0.13	0.185	0.0054	0.58455	5.40541	0.157779	0.0774	0.004	-0.050122	1094.23	31.9398	1088.07	73.6713	1131.51	58.4762	1093.81	29.2723	0.736914	2.67616
BTW08-82	0.6	0.033	0.0346	0.0016	0.50541	28.9017	1.3365	0.1261	0.0065	0.59432	219.274	10.1398	477.234	26.2479	2044.3	105.376	199.052	9.86734	9.49798e-137	4.95716
BTW08-83	1.842	0.083	0.1833	0.0044	0.59982	5.45554	0.130957	0.073	0.0026	0.29764	1084.98	26.0442	1060.58	47.7892	1013.95	36.1134	1078.51	23.108	0.0451314	2.14259
BTW08-84	4.73	0.2	0.3095	0.008	0.72019	3.23102	0.0835158	0.1114	0.0037	0.29152	1738.25	44.9304	1772.57	74.9501	1822.38	60.5279	1760.94	34.5337	0.0150673	1.96109
BTW08-85	5.03	0.25	0.328	0.015	0.73854	3.04878	0.139426	0.1093	0.0049	0.68901	1828.68	83.6287	1824.39	90.6753	1787.78	80.1475	1823.56	40.9879	0.864916	2.24769
BTW08-86	4.56	0.19	0.3025	0.0085	0.7472	3.30579	0.0928898	0.1092	0.0037	0.40713	1703.69	47.8724	1741.99	72.5829	1786.11	60.5184	1735.85	34.6151	0.00641896	1.99413
BTW08-87	3.02	0.16	0.2415	0.0075	0.49848	4.14079	0.128596	0.0894	0.004	0.3338	1394.49	43.3072	1412.68	74.8442	1412.74	63.21	1402.74	34.4458	0.361208	2.45561
BTW08-88	3.63	0.2	0.235	0.01	0.79607	4.25532	0.181077	0.1149	0.0048	0.55189	1360.65	57.9	1556.13	85.7373	1878.32	78.4675	1508.32	45.2972	1.54953e-35	3.00316
BTW08-89	4.55	0.23	0.305	0.011	0.76422	3.27869	0.118248	0.1099	0.0043	0.26457	1716.06	61.8905	1740.16	87.9642	1797.75	70.3395	1739.56	42.0949	0.168202	2.41986
BTW08-90	4.39	0.21	0.297	0.01	0.5263	3.367	0.113367	0.1086	0.0043	0.36431	1676.42	56.445	1710.46	81.8215	1776.06	70.323	1700.9	37.9278	0.124566	2.22986
BTW08-91	4.53	0.18	0.3194	0.007	0.64238	3.13087	0.0686164	0.1042	0.0036	0.54494	1786.8	39.1596	1736.5	68.9998	1700.24	58.7414	1757.63	30.1452	0.0003888	1.7151
BTW08-92	14.14	0.6	0.547	0.015	0.46072	1.82815	0.0501322	0.191	0.008	0.59487	2812.68	77.1303	2759.14	117.078	2750.79	115.216	2766.41	39.2073	0.0593426	1.41726
BTW08-93	14.85	0.68	0.54	0.017	0.7288	1.85185	0.058299	0.1982	0.0067	0.35258	2783.45	87.6271	2805.68	128.475	2811.43	95.0383	2808.95	42.8097	0.367481	1.52404
BTW08-94	4.65	0.2	0.311	0.01	0.4709	3.21543	0.10339	0.1071	0.0042	0.60433	1745.63	56.1294	1758.29	75.6255	1750.65	68.6528	1755.41	34.5399	0.575223	1.96763
BTW08-95	3.89	0.18	0.229	0.01	0.79346	4.36681	0.190691	0.1255	0.0048	0.67726	1329.26	58.0461	1611.61	74.5731	2035.86	77.8656	1650.78	35.7071	2.12062e-72	2.16304
BTW08-96	4.86	0.22	0.334	0.01	0.65141	2.99401	0.0896411	0.1061	0.0038	0.39204	1857.74	55.621	1795.35	81.2709	1733.46	62.0842	1805.51	37.2521	0.000835374	2.06324
BTW08-97	3.976	0.16	0.2862	0.0069	0.54547	3.49406	0.0842384	0.1016	0.0035	0.54374	1622.51	39.1172	1629.31	65.5658	1653.55	56.963	1626.32	29.5254	0.671972	1.81548
BTW08-98	4.54	0.19	0.306	0.011	0.77053	3.26797	0.117476	0.1086	0.0037	0.63915	1720.99	61.8658	1738.33	72.7495	1776.06	60.5105	1741.73	34.015	0.325352	1.95295
BTW08-99	4.04	0.18	0.2935	0.0091	0.68775	3.40716	0.105639	0.0989	0.0039	0.3002	1659	51.4373	1642.29	73.1712	1603.48	63.2313	1644.96	35.7745	0.316098	2.17479
BTW08-100	3.74	0.22	0.2093	0.0075	0.57642	4.77783	0.171208	0.1284	0.0052	0.16864	1225.09	43.8995	1579.97	92.9396	2076.18	84.0821	1235.25	39.8959	1.64945e-54	3.22978
BTW08-101	12.92	0.52	0.517	0.014	0.61293	1.93424	0.0523778	0.1816	0.0061	0.50936	2686.44	72.747	2673.84	107.616	2667.54	89.6034	2674.13	37.9034	0.592149	1.41741
BTW08-102	3.4	0.15	0.1805	0.0062	0.65767	5.54017	0.190299	0.1375	0.0056	0.60199	1069.71	36.7433	1504.4	66.3704	2195.95	89.4352	1051.59	33.9255	8.02964e-162	3.22612
BTW08-103	2.383	0.11	0.1311	0.0046	0.77999	7.62777	0.267641	0.1324	0.0048	0.42546	794.138	27.8645	1237.51	57.1239	2130.04	77.222	592.897	23.6743	2.00738e-214	3.99298
BTW08-104	3.93	0.17	0.2839	0.0072	0.6238	3.52237	0.0893309	0.1019	0.0038	0.34536	1610.97	40.856	1619.88	70.0712	1659.01	61.8671	1615.75	32.0949	0.564352	1.98637
BTW08-105	4.62	0.2	0.3153	0.0083	0.64136	3.17158	0.0834892	0.1064	0.0038	0.35131	1766.74	46.5078	1752.89	75.8826	1738.63	62.094	1757.46	34.3105	0.398162	1.95227
BTW08-106	2.109	0.1	0.183	0.0079	0.64875	5.46448	0.235898	0.0832	0.0042	0.91716	1083.34	46.7673	1151.75	54.6112	1273.91	64.3081	1140.71	32.5795	3.38349e-05	2.85607
BTW08-107	4.61	0.24	0.309	0.013	0.61381	3.23625	0.136153	0.1109	0.0052	0.57758	1735.78	73.0265	1751.08	91.1625	1814.22	85.0669	1749.97	43.3308	0.545949	2.47609
BTW08-108	0.861	0.066	0.0674	0.002	-0.03474	14.8368	0.440261	0.095	0.008	0.54085	420.472	12.4769	630.669	48.3439	1528.07	128.68	438.564	11.499	6.82686e-24	2.62197
BTW08-109	4.99	0.21	0.329	0.01	0.54275	3.03951	0.0923864	0.1105	0.0041	0.55511	1833.53	55.7305	1817.63	76.4934	1807.65	67.0712	1820.58	34.6415	0.446716	1.90278
BTW08-110	4.06	0.19	0.2895	0.0087	0.70726	3.45423	0.103806	0.1025	0.0036	0.39325	1639.03	49.2558	1646.31	77.044	1669.88	58.6494	1644.23	37.1237	0.645246	2.25781
BTW08-111	4.59	0.19	0.3124	0.0096	0.74685	3.20102	0.0983669	0.106	0.0036	0.45722	1752.51	53.8542	1747.45	72.3347	1731.73	58.8133	1747.32	34.5072	0.7474	1.97486
BTW08-112	4.79	0.23	0.318	0.011	0.82836	3.14465	0.108777	0.1095	0.0036	0.48044	1779.95	61.5708	1783.15	85.6208	1791.11	58.8858	1783.74	39.9197	0.833783	2.23799
BTW08-113	2.376	0.12	0.2092	0.0069	0.62964	4.78011	0.157662	0.0818	0.0034	0.30025	1224.55	40.3892	1235.41	62.3943	1240.73	51.5708	1230.18	32.9571	0.489338	2.67905
BTW08-114	3.45	0.18	0.26	0.012	0.72801	3.84615	0.177515	0.094	0.0038	0.5337	1489.84	68.7619	1515.87	79.0888	1508.11	60.9663	1517.99	40.8427	0.216825	2.69058
BTW08-115	3.27	0.16	0.2538	0.0081	0.65169	3.94011	0.125748	0.0925	0.0034	0.28947	1458.04	46.5333	1473.94	72.1196	1477.67	54.3144	1467.88	36.077	0.341583	2.45775
BTW08-116	4.6	0.19	0.3091	0.0065	0.4671	3.2352	0.0680323	0.1083	0.0039	0.52526	1736.28	36.5118	1749.27	72.2524	1771.01	63.7762	1741.79	28.4444	0.450508	1.63305
BTW08-117	4.75	0.23	0.316	0.011	0.67232	3.16456	0.110159	0.1074	0.0044	0.37491	1770.16	61.6197	1776.11	86.001	1755.76	71.9307	1775.44	40.3916	0.767005	2.27502
BTW08-118	4.67	0.19	0.3121	0.0094	0.66748	3.2041	0.0965029	0.107	0.0037	0.48132	1751.03	52.7386	1761.88	71.6826	1748.94	60.4772	1760.86	33.9049	0.529569	1.92547
BTW08-119	2.046	0.087	0.1876	0.0065	0.53847	5.33049	0.184692	0.0786	0.0033	0.52013	1108.36	38.4027	1130.96	48.0908	1162.08	48.7896	1124.12	27.5973	0.149608	2.45502
BTW08-120	2.292	0.11	0.207	0.0066	0.47168	4.83092	0.154029	0.081	0.0037	0.37579	1212.82	38.6695	1209.82	58.0631	1221.44	55.7944	1211.21	29.6267	0.866425	2.44605
BTW08-121	4.39	0.24	0.3023	0.0097	0.56058	3.30797	0.106144	0.1059	0.0046	0.34619	1702.7	54.6352	1710.46	93.5103	1729.99	75.1461	1707.08	41.1378	0.723206	2.40984
BTW08-122	1.359	0.1	0.1384	0.0064	0.74337	7.22543	0.334124	0.0696	0.0036	0.089236	835.608	38.6409	871.44	64.1236	916.575	47.4091	840.364	36.0029	0.0150136	4.28421
BTW08-123	1.508	0.072	0.1598	0.0073	0.42264	6.25782	0.285871	0.0676	0.0036	0.58138	955.665	43.6568	933.63	44.5765	856.315	45.6025	938.681	27.6224	0.25478	2.94268
BTW08-124	5.1	0.22	0.3247	0.0075	0.58649	3.07977	0.0711372	0.1154	0.0042	0.42375	1812.64	41.8688	1836.11	79.2046	1886.14	68.6463	1823.93	32.7222	0.159174	1.79405
BTW08-125	3.83	0.18	0.268	0.014	0.65736	3.73134	0.194921	0.1048	0.0047	0.59294	1530.64	79.9589	1599.07	75.1522	1710.81	76.7252	1606.79	37.0598	0.0113276	2.30645
BTW08-126	4.36	0.19	0.3033	0.009	0.65664	3.29707	0.0978358	0.1055	0.0039	0.56024	1707.65	50.6722	1704.79	74.2914	1723.05	63.6955	1705.38	35.2708	0.867351	2.06821
BTW08-127	3.85	0.19	0.2783	0.0086	0.69874	3.59324	0.111038	0.0987	0.0037	0.35066	1582.79	48.9114	1603.27	79.1223	1599.7	59.9687	1595.65	38.1974	0.207185	2.39385
Sample 5		Location: Bunatrahir West			Grid Coordinates: 54°18'31.6''N, -9°23'35.6''W
Zircon	207U/235Pb	2σ	206U/238Pb	2σ	ρ	238U/206Pb	2σ	207Pb/206Pb	2σ	ρ	206Pb/238U (Ma)	2σ (Ma)	207Pb/235U (Ma)	2σ (Ma)	207Pb/206Pb (Ma)	2σ (Ma)	Concordia age (Ma)	Concordia age error (Ma)	Probability
BTW11core1	3.671	0.11	0.2747	0.0094	0.63412	3.64033	0.124569	0.0972	0.003	0.56358	1564.61	53.5398	1565.08	46.8971	1571.08	48.49	1565.13	23.5742	0.979906	1.50621
BTW11rim1	2.84	0.15	0.2331	0.011	0.76547	4.29	0.202446	0.0875	0.0036	0.06641	1350.73	63.7408	1366.17	72.1569	1371.53	56.4286	1368.08	39.3214	0.406439	2.87421
BTW11-7	2.381	0.066	0.1813	0.0059	0.75861	5.51572	0.179497	0.096	0.0027	0.33532	1074.07	34.9533	1236.91	34.2865	1547.77	43.5311	1269.31	18.7465	1.80605e-53	1.47691
BTW11-8	3.372	0.096	0.256	0.0086	0.44469	3.90625	0.131226	0.0952	0.0029	0.55599	1469.34	49.3608	1497.91	42.6452	1532.03	46.6691	1496.78	22.2653	0.14848	1.48755
BTW11-9	14.38	0.38	0.496	0.018	0.74832	2.01613	0.073166	0.2121	0.0062	0.61723	2596.58	94.2308	2775.11	73.3339	2921.66	85.4045	2814.63	20.2962	2.84384e-09	0.721096
BTW11-10	3.08	0.13	0.2504	0.01	0.26601	3.99361	0.159489	0.0893	0.0042	0.48353	1440.54	57.5295	1427.73	60.2612	1410.6	66.3441	1430.45	30.2388	0.629396	2.11394
BTW11-11	3.09	0.1	0.2467	0.0079	0.55082	4.05351	0.129804	0.091	0.0032	0.16306	1421.43	45.5182	1430.21	46.2852	1446.6	50.8695	1429.77	24.7771	0.607218	1.73294
BTW11-13	4.73	0.18	0.3176	0.012	0.63872	3.14861	0.118965	0.1089	0.0041	0.036497	1778	67.1788	1772.57	67.4551	1781.1	67.0569	1772.1	31.6677	0.811599	1.78702
BTW11-14	2.834	0.1	0.2337	0.0082	0.46935	4.27899	0.15014	0.0884	0.0032	0.42484	1353.86	47.5039	1364.58	48.1504	1391.19	50.3599	1363.34	26.1396	0.576058	1.91732
BTW11-15	3.98	0.13	0.2838	0.01	0.75041	3.52361	0.124158	0.101	0.0029	0.35257	1610.47	56.7467	1630.13	53.2453	1642.57	47.1629	1634.88	24.9976	0.260816	1.52902
BTW11-16	2.73	0.096	0.2287	0.0078	0.62711	4.37254	0.149129	0.0867	0.003	0.011075	1327.68	45.2817	1336.66	47.0034	1353.84	46.8455	1336.54	26.1329	0.573076	1.95526
BTW11-17	0.499	0.022	0.0667	0.0024	0.30296	14.9925	0.53946	0.0545	0.0025	0.27052	416.243	14.9773	411.025	18.1214	391.768	17.971	413.726	11.8505	0.547553	2.86433
BTW11-18	14.24	0.43	0.514	0.02	0.82364	1.94553	0.0757014	0.2013	0.0058	0.48477	2673.68	104.034	2765.83	83.5186	2836.77	81.7349	2792.79	21.1116	0.00352426	0.755934
BTW11-19	3.6	0.16	0.261	0.011	0.72215	3.83142	0.161477	0.1004	0.003	0.52764	1494.96	63.0058	1549.53	68.8681	1631.51	48.7502	1556.03	34.7851	0.00520349	2.23551
BTW11-20	4.61	0.14	0.3103	0.011	0.60404	3.22269	0.114243	0.108	0.0033	0.42993	1742.18	61.7596	1751.08	53.1781	1765.95	53.9595	1751.94	24.9596	0.683996	1.42468
BTW11-21	1.925	0.058	0.1836	0.0062	0.48976	5.44662	0.183927	0.0759	0.0025	0.35733	1086.61	36.6939	1089.81	32.8357	1092.43	35.9827	1089.54	19.9896	0.829476	1.83468
BTW11-22	2.077	0.077	0.1917	0.0085	0.61924	5.21648	0.231299	0.0791	0.0029	0.41223	1130.58	50.1299	1141.24	42.309	1174.64	43.0651	1141.87	25.3044	0.555629	2.21605
BTW11-23	3.921	0.11	0.2864	0.0094	0.55336	3.49162	0.114599	0.1004	0.003	0.50577	1623.51	53.2857	1618.02	45.3922	1631.51	48.7502	1617.75	22.6192	0.780513	1.39818
BTW11-24	0.508	0.019	0.0655	0.002	0.41216	15.2672	0.466173	0.057	0.0022	0.15165	408.987	12.4882	417.103	15.6003	491.533	18.9715	412.633	10.4585	0.230015	2.53458
BTW11-25	3.752	0.14	0.2721	0.011	0.66399	3.67512	0.148571	0.0989	0.0031	0.21166	1551.45	62.7195	1582.54	59.05	1603.48	50.2608	1586.21	29.3897	0.140298	1.85283
BTW11-26	0.507	0.023	0.0659	0.0023	0.40974	15.1745	0.529611	0.0553	0.0024	0.18524	411.407	14.3587	416.43	18.8913	424.372	18.4176	413.451	12.2784	0.531227	2.96974
BTW11-27	1.957	0.063	0.1791	0.0063	0.58114	5.58347	0.196404	0.0807	0.0027	0.43992	1062.06	37.3588	1100.85	35.4388	1214.15	40.6221	1098.95	21.6301	0.00558682	1.96825
BTW11-29	2.048	0.19	0.192	0.019	0.41846	5.20833	0.515408	0.078	0.0058	0.45427	1132.2	112.041	1131.63	104.985	1146.87	85.2803	1131.71	61.8455	0.990469	5.46478
BTW11-30	1.73	0.065	0.1702	0.0063	0.4791	5.87544	0.217481	0.0732	0.0029	0.30801	1013.21	37.5044	1019.75	38.3143	1019.49	40.3898	1018.53	23.4855	0.676883	2.30582
BTW11-32	5.18	0.15	0.3285	0.011	0.66968	3.04414	0.101935	0.1143	0.0035	0.44261	1831.11	61.3156	1849.34	53.5522	1868.88	57.2272	1852.28	23.6652	0.375011	1.27763
BTW11-33	3.051	0.11	0.2425	0.0089	0.2811	4.12371	0.151344	0.0923	0.0038	0.35902	1399.68	51.3697	1420.48	51.2138	1473.57	60.6668	1416.59	26.2574	0.372154	1.85357
BTW11-34	4.616	0.13	0.3094	0.01	0.62686	3.23206	0.104462	0.1079	0.0031	0.51916	1737.75	56.1653	1752.16	49.3461	1764.26	50.6876	1753.79	23.0487	0.459956	1.31422
BTW11-35	4.06	0.15	0.2778	0.011	0.66186	3.59971	0.142537	0.107	0.0033	0.33896	1580.27	62.5738	1646.31	60.8242	1748.94	53.9391	1653.61	29.526	0.00161133	1.78554
BTW11-36	6.3	2	0.277	0.018	0.95678	3.61011	0.234592	0.132	0.015	-0.70069	1576.24	102.427	2018.45	640.779	2124.74	241.448	1439.75	32.8627	0.00148033	2.28253
BTW11-38	1.582	0.051	0.1601	0.0059	0.62712	6.2461	0.230181	0.0724	0.0024	0.3257	957.333	35.2796	963.156	31.0499	997.206	33.0566	963.243	20.0506	0.648236	2.08157
BTW11-39	2.078	0.1	0.1939	0.0068	0.37253	5.1573	0.180865	0.0783	0.0039	0.26506	1142.47	40.0659	1141.57	54.9362	1154.5	57.5036	1141.95	28.6947	0.963645	2.51279
BTW11-40	2.269	0.07	0.1983	0.0069	0.58128	5.04286	0.17547	0.083	0.0026	0.45058	1166.18	40.5782	1202.71	37.1042	1269.22	39.7586	1202.45	21.7471	0.0152999	1.80857
BTW11-41	4.039	0.11	0.2826	0.0097	0.52609	3.53857	0.121458	0.1041	0.0034	0.57559	1604.44	55.0711	1642.09	44.7213	1698.47	55.4736	1643.72	22.0566	0.0695053	1.34187
BTW11-42	4.73	0.16	0.3146	0.013	0.78318	3.17864	0.131349	0.1101	0.0034	0.2723	1763.3	72.8638	1772.57	59.9601	1801.06	55.6184	1775.35	24.8286	0.681071	1.39851
BTW11-44	4.196	0.13	0.2901	0.01	0.54285	3.44709	0.118824	0.1048	0.0033	0.51447	1642.03	56.6022	1673.24	51.8401	1710.81	53.8709	1673.97	25.3672	0.13624	1.5154
BTW11-45	4.436	0.13	0.3005	0.01	0.56858	3.32779	0.110742	0.106	0.0034	0.47784	1693.79	56.3656	1719.09	50.379	1731.73	55.5459	1720.49	24.1424	0.215743	1.40323
BTW11-47	14.82	0.43	0.546	0.02	0.64188	1.8315	0.067088	0.1994	0.0063	0.44313	2808.52	102.876	2803.75	81.3504	2821.29	89.1381	2803.04	25.5937	0.890236	0.913069
BTW11-48	1.49	0.057	0.1547	0.0053	0.56632	6.46412	0.22146	0.0694	0.0025	0.12854	927.256	31.7677	926.316	35.4363	910.653	32.8045	926.539	22.4594	0.940645	2.42401
BTW11-49	4.47	0.16	0.2959	0.01	0.55058	3.37952	0.114212	0.1085	0.0035	0.4692	1670.95	56.4699	1725.42	61.76	1774.38	57.2382	1722.95	29.7133	0.00854964	1.72456
BTW11-52	1.721	0.055	0.1683	0.0065	0.65621	5.94177	0.22948	0.0731	0.0023	0.52926	1002.74	38.7272	1016.4	32.4822	1016.73	31.99	1017.53	20.3775	0.315138	2.00265
BTW11-53	1.78	0.11	0.165	0.012	0.79759	6.06061	0.440771	0.078	0.0046	-0.25371	984.503	71.6002	1038.18	64.1572	1146.87	67.6361	1053.94	37.6333	0.0103063	3.57073
BTW11-54	4.052	0.12	0.2928	0.011	0.70354	3.4153	0.128307	0.1025	0.0031	0.5681	1655.51	62.1946	1644.7	48.7078	1669.88	50.5037	1642.52	22.6597	0.603617	1.37957
BTW11-55	1.86	0.071	0.1731	0.0063	0.28685	5.77701	0.210255	0.0779	0.0029	0.29894	1029.17	37.4568	1066.99	40.7291	1144.32	42.6	1055.78	23.0463	0.0383465	2.18288
BTW11-58	15.61	0.43	0.552	0.019	0.67486	1.81159	0.0623556	0.2074	0.0057	0.46994	2833.49	97.5294	2853.23	78.5964	2885.34	79.2981	2856.63	23.7735	0.537602	0.832222
BTW11-60	4.95	0.16	0.3231	0.012	0.68011	3.09502	0.11495	0.1112	0.0036	0.43793	1804.85	67.0325	1810.83	58.5317	1819.12	58.8924	1811.85	26.1932	0.78882	1.44567
BTW11-61	3.88	0.12	0.2718	0.01	0.47044	3.67918	0.135363	0.1042	0.0042	0.44779	1549.93	57.0247	1609.53	49.7793	1700.24	68.5317	1608.5	24.9819	0.00745096	1.55312
BTW11-62	4.355	0.13	0.2914	0.01	0.67505	3.43171	0.117766	0.1088	0.0033	0.37523	1648.52	56.5725	1703.84	50.861	1779.42	53.9714	1712.4	23.7427	0.00336301	1.38652
BTW11-63	1.756	0.056	0.1653	0.0056	0.47786	6.04961	0.204947	0.0754	0.0025	0.37507	986.163	33.409	1029.38	32.8275	1079.18	35.782	1022.34	20.274	0.00186388	1.98309
BTW11-64	3.914	0.11	0.2814	0.0098	0.67488	3.55366	0.123759	0.1004	0.003	0.50231	1598.41	55.666	1616.58	45.4327	1631.51	48.7502	1619.61	21.7671	0.336543	1.34397
BTW11-65	4.97	0.15	0.3233	0.012	0.72351	3.0931	0.114807	0.1119	0.0033	0.29608	1805.83	67.0272	1814.23	54.7555	1830.5	53.9826	1816.12	23.5112	0.700212	1.29458
BTW11-67	0.523	0.016	0.0683	0.0024	0.36109	14.6413	0.514482	0.0558	0.002	0.61271	425.906	14.9659	427.153	13.0678	444.419	15.929	426.812	9.89722	0.863887	2.31887
BTW11-68	1.728	0.057	0.1681	0.0057	0.44283	5.94884	0.201716	0.0744	0.0026	0.52348	1001.63	33.9638	1019.01	33.6131	1052.34	36.7752	1015.79	20.5864	0.232681	2.02664
BTW11-70	4.25	0.14	0.2921	0.012	0.69833	3.42349	0.140643	0.1084	0.0033	0.59142	1652.01	67.8678	1683.74	55.4643	1772.7	53.966	1689.9	25.4502	0.160267	1.50602
BTW11-71	1.702	0.059	0.1657	0.0062	0.61206	6.035	0.225812	0.0749	0.0025	0.42825	988.376	36.9821	1009.28	34.9869	1065.82	35.5747	1008.48	22.1647	0.122833	2.19783
BTW11-72	3.021	0.1	0.2445	0.0091	0.64143	4.08998	0.152224	0.09	0.0029	0.37788	1410.05	52.4803	1412.94	46.7705	1425.53	45.9337	1413.21	25.0094	0.874261	1.76969
BTW11-73	3.28	0.086	0.2562	0.0088	0.69212	3.9032	0.134068	0.0933	0.0026	0.5297	1470.37	50.5045	1476.32	38.7084	1493.98	41.633	1477.44	19.3365	0.728979	1.30879
BTW11-74	4.56	0.13	0.3105	0.011	0.71525	3.22061	0.114096	0.1071	0.0032	0.42976	1743.17	61.7547	1741.99	49.662	1750.65	52.3069	1741.74	22.0817	0.953826	1.2678
BTW11-75	4.6	0.14	0.3044	0.01	0.59211	3.28515	0.107922	0.1103	0.0033	0.35803	1713.09	56.2776	1749.27	53.2386	1804.36	53.9835	1751.44	25.2169	0.0697033	1.43978
BTW11-76	4.271	0.12	0.2944	0.01	0.61692	3.39674	0.115378	0.1054	0.0033	0.50782	1663.48	56.5041	1687.79	47.4209	1721.3	53.8928	1690.46	22.637	0.222313	1.3391
BTW11-77	2.819	0.081	0.2315	0.0086	0.59202	4.31965	0.160471	0.0874	0.0029	0.30026	1342.36	49.8672	1360.6	39.095	1369.33	45.4354	1362.09	21.2966	0.318492	1.56353
BTW11-81	5.05	0.14	0.3236	0.011	0.51428	3.09023	0.105045	0.1128	0.0038	0.46075	1807.29	61.4343	1827.75	50.6703	1845.01	62.1546	1828.65	23.3871	0.374123	1.27893
BTW11-85	13.35	0.96	0.5	0.035	0.91472	2	0.14	0.1942	0.0056	0.0068842	2613.8	182.966	2704.73	194.497	2778.06	80.1089	2754.56	41.8938	0.0483945	1.52089
BTW11-86	12.92	0.36	0.466	0.016	0.62871	2.14592	0.0736798	0.2012	0.0062	0.50085	2466	84.6694	2673.84	74.5031	2835.96	87.3903	2703.24	24.2631	1.88575e-13	0.897556
BTW11-87	1.854	0.065	0.1819	0.0063	0.55069	5.49753	0.190404	0.0754	0.0027	0.28855	1077.35	37.3133	1064.85	37.3331	1079.18	38.6445	1066.27	22.8573	0.389086	2.14366
BTW11-88	0.582	0.023	0.0745	0.0027	0.53934	13.4228	0.486465	0.0564	0.0023	0.19764	463.21	16.7875	465.746	18.4058	468.149	19.0912	464.729	13.5102	0.733796	2.90712
BTW11-90	4.32	0.17	0.3013	0.014	0.68494	3.31895	0.154216	0.1055	0.0034	0.37089	1697.75	78.8866	1697.19	66.7874	1723.05	55.5294	1697.09	31.0984	0.982865	1.83246
BTW11-91	4.255	0.11	0.2911	0.01	0.64002	3.43525	0.118009	0.105	0.0032	0.55997	1647.02	56.5793	1684.7	43.5528	1714.31	52.2458	1690.1	20.3684	0.057616	1.20516
BTW11-92	3.64	0.12	0.2668	0.0095	0.6798	3.74813	0.13346	0.0992	0.0031	0.17472	1524.54	54.2845	1558.32	51.3733	1609.13	50.2852	1562.8	25.7074	0.0602001	1.64495
BTW11-93	14.94	1	0.526	0.038	0.74699	1.90114	0.137345	0.2076	0.006	0.61413	2724.58	196.833	2811.42	188.181	2886.9	83.4365	2832.82	55.1273	0.14667	1.94602
BTW11-94	1.599	0.074	0.1568	0.007	0.61126	6.37755	0.284712	0.0752	0.0029	0.35854	938.969	41.9183	969.82	44.8822	1073.85	41.4118	964.958	28.6269	0.0482822	2.96665
BTW11-97	2.838	0.1	0.2337	0.0093	0.80824	4.27899	0.170281	0.0893	0.0027	0.40143	1353.86	53.8764	1365.64	48.1198	1410.6	42.6498	1369.71	24.0342	0.452023	1.75469
BTW11-98	3.193	0.089	0.2471	0.0088	0.20867	4.04694	0.144124	0.0941	0.0033	0.65913	1423.5	50.6954	1455.47	40.5689	1510.12	52.9586	1451.49	20.8619	0.164754	1.43728
BTW11-100	4.641	0.11	0.3061	0.01	0.94369	3.26691	0.106727	0.1106	0.0035	0.87315	1721.49	56.2394	1756.67	41.6363	1809.29	57.2561	1775.53	10.0639	0.0246255	0.56681
BTW11-101	4.539	0.13	0.305	0.01	0.7135	3.27869	0.107498	0.1083	0.0032	0.5615	1716.06	56.2641	1738.15	49.7817	1771.01	52.3292	1742.67	22.5298	0.224434	1.29283
BTW11-103	4.826	0.14	0.3186	0.011	0.63964	3.13873	0.108368	0.111	0.0034	0.58376	1782.89	61.5561	1789.44	51.9108	1815.85	55.6207	1790.32	23.6963	0.757843	1.32358
BTW11-104	1.905	0.071	0.1791	0.0089	0.42789	5.58347	0.277459	0.0767	0.0031	0.42662	1062.06	52.7767	1082.84	40.3578	1113.4	45.0005	1081.75	24.736	0.345901	2.28666
BTW11-106	4.482	0.14	0.3032	0.01	0.62246	3.29815	0.108778	0.1081	0.0032	0.46551	1707.16	56.3047	1727.64	53.9648	1767.64	52.326	1729.33	25.6903	0.29281	1.48557
BTW11-107	1.7	0.048	0.1687	0.0063	0.57705	5.92768	0.221366	0.073	0.0023	0.63434	1004.94	37.529	1008.53	28.4762	1013.95	31.9465	1008.69	18.0041	0.800893	1.78489
BTW11-109	4.96	0.36	0.314	0.021	0.87196	3.18471	0.21299	0.1148	0.0038	0.030987	1760.36	117.731	1812.53	131.555	1876.75	62.1223	1840.03	51.5724	0.0710358	2.8028
BTW11-110	2.422	0.09	0.2084	0.0073	0.30151	4.79846	0.168084	0.0846	0.0037	0.40364	1220.29	42.7452	1249.15	46.4176	1306.39	57.1351	1241.81	24.8827	0.149182	2.00375
BTW11-111	3.053	0.11	0.2451	0.0091	0.61983	4.07997	0.15148	0.0918	0.0028	0.26337	1413.16	52.4672	1420.99	51.1983	1463.25	44.6308	1421.24	27.5246	0.67203	1.93666
BTW11-112	1.44	0.065	0.1445	0.0081	0.67119	6.92042	0.387926	0.0734	0.0037	0.163	870.059	48.7715	905.72	40.8832	1025.02	51.6698	908.635	26.8292	0.0353991	2.9527
BTW11-113	1.649	0.06	0.1627	0.0062	0.64251	6.14628	0.234216	0.0721	0.0023	0.2344	971.764	37.031	989.168	35.9916	988.765	31.5417	988.6	22.9953	0.186058	2.32605
BTW11-116	1.679	0.058	0.1643	0.0059	0.62629	6.08643	0.218563	0.0744	0.0026	0.36132	980.629	35.2143	1000.6	34.5652	1052.34	36.7752	999.513	21.9625	0.11689	2.19732
BTW11-117	4.5	0.22	0.3022	0.015	0.53933	3.30907	0.164249	0.1091	0.0033	0.5168	1702.21	84.4908	1730.97	84.6253	1784.44	53.9749	1730.75	40.6214	0.356544	2.34705
BTW11-118	4.412	0.12	0.3056	0.01	0.57272	3.27225	0.107076	0.1059	0.0032	0.54912	1719.02	56.2506	1714.59	46.6345	1729.99	52.2755	1714.25	22.296	0.828748	1.30063
BTW11-120	2.03	0.062	0.1902	0.0064	0.66962	5.25762	0.176913	0.0783	0.0025	0.43426	1122.46	37.7694	1125.62	34.3784	1154.5	36.8613	1125.85	20.6801	0.807036	1.83684
BTW11-122	4.04	0.14	0.2878	0.0097	0.50642	3.47464	0.117109	0.1017	0.0034	0.38554	1630.53	54.9552	1642.29	56.9109	1655.38	55.342	1641.59	28.1157	0.575379	1.71271
BTW11-123	1.839	0.056	0.166	0.0058	0.48759	6.0241	0.21048	0.0793	0.0026	0.51842	990.034	34.5916	1059.5	32.2633	1179.63	38.6765	1051.23	19.9081	8.59658e-07	1.8938
BTW11-124	8.37	0.24	0.371	0.012	0.68505	2.69542	0.0871833	0.1624	0.0051	0.44409	2034.1	65.7931	2271.93	65.145	2480.8	77.907	2314.12	23.8543	1.22552e-29	1.03081
BTW11-125	2.555	0.17	0.157	0.011	0.88558	6.36943	0.446266	0.1172	0.0035	0.3422	940.083	65.8657	1287.87	85.6897	1913.96	57.1574	1473.28	38.0227	4.15468e-133	2.58082
BTW11-126	3.825	0.13	0.2653	0.0098	0.63519	3.76932	0.139236	0.1048	0.0031	0.31535	1516.9	56.0333	1598.02	54.3118	1710.81	50.606	1604.17	27.0362	2.551e-05	1.68537
Reference material
GZ7_1	0.709	0.028	0.0858	0.0018	0.54144	11.655	0.244511	0.0589	0.002	0.46635	530.65	11.1325	544.152	21.4898	563.402	19.1308	531.77	10.6199	0.0565907	1.99709
GZ7_2	0.683	0.027	0.0858	0.0017	0.55795	11.655	0.230927	0.0573	0.0018	0.46152	530.65	10.514	528.586	20.8958	503.098	15.8041	530.534	10.0643	0.760545	1.89701
GZ7_3	0.681	0.028	0.0875	0.002	0.65957	11.4286	0.261225	0.0568	0.0019	0.27201	540.735	12.3597	527.379	21.6837	483.777	16.1827	539.901	11.8307	0.0348246	2.19126
GZ7_4	0.693	0.028	0.0873	0.0016	0.35274	11.4548	0.209938	0.058	0.002	0.47145	539.549	9.88864	534.601	21.6001	529.762	18.2677	538.897	9.24703	0.538364	1.71592
GZ7_5	0.71	0.029	0.0873	0.002	0.47303	11.4548	0.262423	0.0581	0.0022	0.40641	539.549	12.3608	544.746	22.2502	533.535	20.2027	540.473	11.5252	0.506468	2.13243
GZ7_6	0.689	0.028	0.0863	0.0019	0.57633	11.5875	0.255113	0.0579	0.002	0.26473	533.618	11.7482	532.199	21.6278	525.98	18.1686	533.485	11.201	0.837603	2.09958
GZ7_7	0.713	0.027	0.0886	0.0017	0.56968	11.2867	0.216562	0.0575	0.0019	0.27366	547.252	10.5003	546.526	20.6959	510.762	16.8774	547.212	10.0405	0.91231	1.83485
GZ7_8	0.687	0.028	0.0876	0.0018	0.53277	11.4155	0.234566	0.0572	0.0019	0.39036	541.328	11.1232	530.996	21.6418	499.252	16.5836	540.367	10.5874	0.148522	1.9593
GZ7_9	0.688	0.026	0.0866	0.0015	0.4944	11.5473	0.200012	0.0577	0.0019	0.42558	535.398	9.27363	531.598	20.0895	518.389	17.07	535.18	8.86489	0.576945	1.65643
GZ7_10	0.676	0.029	0.0859	0.0018	0.45305	11.6414	0.243942	0.0572	0.002	0.27188	531.243	11.132	524.354	22.4945	499.252	17.4564	530.429	10.5212	0.384853	1.98353
GZ7_11	0.688	0.027	0.0862	0.0017	0.40982	11.6009	0.228789	0.0579	0.0021	0.43825	533.024	10.5121	531.598	20.8621	525.98	19.077	532.81	9.82726	0.851161	1.84442
GZ7_12	0.696	0.026	0.0884	0.0016	0.42896	11.3122	0.204746	0.0575	0.0019	0.51124	546.068	9.88358	536.399	20.0379	510.762	16.8774	544.781	9.28568	0.175867	1.70448
GZ7_13	0.689	0.028	0.086	0.0013	0.5921	11.6279	0.175771	0.0582	0.002	0.15038	531.837	8.0394	532.199	21.6278	537.299	18.4639	531.804	7.61246	0.957969	1.43144
GZ7_14	0.685	0.027	0.0876	0.0017	0.49046	11.4155	0.221534	0.057	0.0019	0.48986	541.328	10.5052	529.792	20.8823	491.533	16.3844	540.078	9.95892	0.105884	1.84398
GZ7_15	0.698	0.029	0.0877	0.002	0.62849	11.4025	0.260034	0.0573	0.002	0.30717	541.92	12.3585	537.596	22.3356	503.098	17.5601	541.639	11.8212	0.521644	2.18249
GZ7_16	0.716	0.03	0.0878	0.0018	0.55827	11.3895	0.233498	0.0588	0.0021	0.23931	542.513	11.1221	548.303	22.9736	559.699	19.9892	542.711	10.6547	0.433538	1.96324
GZ7_17	0.698	0.028	0.0881	0.0018	0.65194	11.3507	0.231911	0.0571	0.0019	0.19767	544.29	11.1206	537.596	21.5654	495.398	16.4843	544.371	10.6628	0.290061	1.95874
GZ7_18	0.714	0.029	0.0891	0.0012	0.63462	11.2233	0.151156	0.0574	0.0018	-0.010571	550.212	7.41027	547.119	22.2219	506.935	15.8969	550.648	6.83151	0.653503	1.24063
GZ7_19	0.675	0.028	0.0876	0.0014	0.43036	11.4155	0.18244	0.0566	0.002	0.32851	541.328	8.65135	523.748	21.7258	475.982	16.8192	540.621	8.27637	0.020975	1.5309
GZ7_20	0.709	0.028	0.0885	0.0017	0.45382	11.2994	0.217051	0.0584	0.0021	0.51342	546.66	10.5008	544.152	21.4898	544.801	19.5904	546.376	9.92364	0.738497	1.81627
GZ7_21	0.708	0.028	0.0888	0.0016	0.38888	11.2613	0.202906	0.0577	0.002	0.46583	548.436	9.88173	543.558	21.4966	518.389	17.9684	547.86	9.29296	0.531617	1.69623
GZ7_22	0.681	0.027	0.0859	0.0018	0.35787	11.6414	0.243942	0.057	0.0019	0.47317	531.243	11.132	527.379	20.9093	491.533	16.3844	530.453	10.1766	0.628235	1.91848
GZ7_23	0.687	0.026	0.0868	0.0016	0.57693	11.5207	0.212364	0.05712	0.0018	0.42321	536.584	9.89095	530.996	20.0959	496.169	15.6356	536.417	9.4831	0.381032	1.76786
GZ7_24	0.698	0.029	0.0855	0.0022	0.61695	11.6959	0.300947	0.0596	0.0021	0.45288	528.868	13.6083	537.596	22.3356	589.083	20.7563	530.214	12.8855	0.209006	2.43024
GZ7_25	0.691	0.026	0.0872	0.0015	0.3035	11.4679	0.197269	0.058	0.002	0.45073	538.956	9.27104	533.401	20.0701	529.762	18.2677	538.086	8.56087	0.471077	1.59099
GZ7_26	0.695	0.029	0.0876	0.0018	0.60838	11.4155	0.234566	0.0575	0.002	0.22447	541.328	11.1232	535.8	22.3571	510.762	17.7656	541.278	10.6683	0.421434	1.97095
GZ7_27	0.698	0.028	0.0891	0.0019	0.5865	11.2233	0.239331	0.0561	0.0019	0.41972	550.212	11.7329	537.596	21.5654	456.328	15.455	549.02	11.175	0.0628904	2.03544
GZ7_28	0.69	0.028	0.0878	0.0018	0.48101	11.3895	0.233498	0.0576	0.0021	0.4606	542.513	11.1221	532.8	21.6209	514.58	18.7607	541.277	10.4988	0.192863	1.93964
GZ7_29	0.69	0.028	0.0875	0.0016	0.34523	11.4286	0.20898	0.0573	0.0021	0.50679	540.735	9.88772	532.8	21.6209	503.098	18.4382	539.661	9.2302	0.326227	1.71037
GZ7_30	0.691	0.031	0.0852	0.0022	0.57676	11.7371	0.30307	0.0588	0.0023	0.35929	527.087	13.6102	533.401	23.9297	559.699	21.893	527.873	12.9251	0.4128	2.44852
GZ7_31	0.688	0.029	0.0869	0.0015	0.52087	11.5075	0.198633	0.058	0.0021	0.30844	537.177	9.27233	531.598	22.4075	529.762	19.181	537.209	8.89607	0.452448	1.65598
GZ7_32	0.696	0.028	0.0863	0.0019	0.48867	11.5875	0.255113	0.0595	0.0021	0.42942	533.618	11.7482	536.399	21.5793	585.44	20.6626	534.046	11.036	0.710037	2.06648
GZ7_33	0.707	0.029	0.0869	0.0019	0.72046	11.5075	0.251602	0.05838	0.0018	0.17374	537.177	11.745	542.963	22.2715	544.052	16.7745	536.625	11.2109	0.33727	2.08916
GZ7_34	0.692	0.028	0.0855	0.0016	0.35283	11.6959	0.218871	0.0585	0.0021	0.48181	528.868	9.89695	534.001	21.607	548.538	19.6911	529.53	9.27004	0.525101	1.75062
GZ7_35	0.691	0.029	0.0866	0.0019	0.62135	11.5473	0.253348	0.0578	0.0021	0.28949	535.398	11.7466	533.401	22.3859	522.189	18.9723	535.34	11.2653	0.769698	2.10433
GZ7_36	0.696	0.031	0.0858	0.0019	0.63416	11.655	0.258095	0.0586	0.0021	0.13558	530.65	11.751	536.399	23.8913	552.267	19.7911	530.476	11.2722	0.424629	2.12493
GZ7_37	0.696	0.028	0.086	0.0014	0.58257	11.6279	0.189292	0.0584	0.002	0.16619	531.837	8.65781	536.399	21.5793	544.801	18.6576	531.536	8.26111	0.506587	1.5542
GZ7_38	0.7	0.029	0.0859	0.0017	0.4579	11.6414	0.230389	0.0598	0.002	0.35678	531.243	10.5135	538.791	22.3213	596.346	19.9447	531.901	9.99918	0.333151	1.8799
GZ7_39	0.7	0.028	0.087	0.0015	0.55363	11.4943	0.198177	0.0593	0.002	0.15114	537.77	9.2719	538.791	21.5516	578.128	19.4984	537.753	8.89254	0.883565	1.65365
GZ7_40	0.7	0.028	0.0866	0.0016	0.58935	11.5473	0.213346	0.058	0.0019	0.41586	535.398	9.89187	538.791	21.5516	529.762	17.3543	535.328	9.48826	0.616192	1.77242
GZ7_41	0.706	0.026	0.0876	0.0017	0.3956	11.4155	0.221534	0.0583	0.002	0.6527	541.328	10.5052	542.368	19.9739	541.054	18.561	541.518	9.70873	0.887826	1.79287
GZ7_42	0.703	0.03	0.0888	0.0017	0.468	11.2613	0.215587	0.0582	0.0021	0.3965	548.436	10.4993	540.581	23.0689	537.299	19.3871	547.882	10.0036	0.321435	1.82588
GZ7_43	0.718	0.027	0.0873	0.0016	0.43991	11.4548	0.209938	0.0588	0.002	0.52916	539.549	9.88864	549.486	20.6631	559.699	19.0374	540.608	9.3562	0.173402	1.73068
GZ7_44	0.697	0.029	0.0892	0.0015	0.58752	11.2108	0.188522	0.057	0.002	0.37337	550.804	9.2624	536.997	22.3428	491.533	17.2468	551.543	8.84501	0.0485075	1.60368
NIST612_1	32.52	1.2	0.2652	0.0067	0.41564	3.77074	0.0952638	0.892	0.033	0.72444	1516.39	38.31	3566.17	131.593	5076.24	187.798	1225.68	33.7155	0	2.75076
NIST612_2	32.83	1.3	0.2678	0.0064	0.62103	3.73413	0.0892398	0.899	0.029	0.55591	1529.63	36.5556	3575.52	141.583	5087.3	164.106	1070.29	28.6901	0	2.6806
NIST612_3	33.25	1.3	0.2678	0.0072	0.52901	3.73413	0.100395	0.901	0.033	0.57024	1529.63	41.1251	3588.05	140.284	5090.44	186.442	1109.07	34.6794	0	3.12689
NIST612_4	33.32	1.3	0.2704	0.0079	0.68104	3.69822	0.108047	0.887	0.03	0.71211	1542.83	45.0753	3590.12	140.071	5068.29	171.419	884.692	34.325	0	3.87989
NIST612_5	33	1.3	0.2659	0.008	0.56825	3.76081	0.11315	0.901	0.032	0.74109	1519.96	45.7302	3580.61	141.054	5090.44	180.793	1005.43	38.148	0	3.7942
NIST612_6	32.86	1.4	0.2687	0.0083	0.66562	3.72162	0.114959	0.891	0.033	0.66642	1534.2	47.3906	3576.42	152.373	5074.66	187.95	921.79	36.505	0	3.96023
NIST612_7	32.88	1.3	0.2594	0.0064	0.35038	3.85505	0.095113	0.91	0.035	0.60778	1486.77	36.6821	3577.02	141.427	5104.49	196.326	1277.91	32.6039	0	2.55135
NIST612_8	33.8	1.4	0.2734	0.008	0.57483	3.65764	0.107027	0.911	0.034	0.64678	1558.04	45.59	3604.22	149.287	5106.04	190.566	1065.78	37.5635	0	3.52452
NIST612_9	32.75	1.3	0.264	0.0061	0.53048	3.78788	0.087523	0.907	0.033	0.53052	1510.27	34.8965	3573.11	141.833	5099.82	185.55	1154.4	28.9975	0	2.5119
NIST612_10	33.18	1.4	0.2707	0.0068	0.57908	3.69413	0.0927967	0.893	0.032	0.49571	1544.35	38.7943	3585.97	151.307	5077.83	181.96	1128.96	31.3578	0	2.77758
NIST612_11	32.41	1.3	0.2636	0.0069	0.53909	3.79363	0.0993021	0.892	0.033	0.52807	1508.23	39.4796	3562.83	142.909	5076.24	187.798	1102.85	32.9819	0	2.99061
NIST612_12	33.01	1.3	0.2625	0.007	0.58164	3.80952	0.101587	0.909	0.031	0.62803	1502.62	40.0699	3580.91	141.023	5102.93	174.027	1034.55	32.7257	0	3.16329
NIST612_13	33.38	1.4	0.2671	0.0094	0.59218	3.74392	0.131759	0.898	0.036	0.69653	1526.06	53.7065	3591.89	150.649	5085.72	203.882	921.833	44.6142	0	4.83973
NIST612_14	33.62	1.4	0.2666	0.0069	0.58965	3.75094	0.0970798	0.908	0.031	0.62173	1523.52	39.431	3598.96	149.867	5101.38	174.166	1081.25	31.7504	0	2.93646
NIST612_15	33.19	1.4	0.2682	0.0064	0.64757	3.72856	0.0889739	0.893	0.031	0.46672	1531.66	36.5497	3586.27	151.274	5077.83	176.274	1076.28	27.8395	0	2.58664
NIST612_16	33.47	1.4	0.2697	0.0065	0.64025	3.70782	0.0893617	0.903	0.031	0.50154	1539.28	37.0979	3594.55	150.355	5093.57	174.862	1080.05	28.4939	0	2.63819
NIST612_17	33.27	1.4	0.2726	0.0086	0.57928	3.66838	0.11573	0.904	0.035	0.65562	1553.99	49.0252	3588.64	151.01	5095.14	197.268	1027.94	40.5604	0	3.94579
NIST612_18	32.35	1.4	0.2695	0.0064	0.41718	3.71058	0.0881176	0.886	0.033	0.55747	1538.26	36.5302	3561.01	154.108	5066.69	188.714	1295.82	31.6941	0	2.44587
NIST612_19	33.29	1.4	0.2708	0.0071	0.43895	3.69276	0.0968191	0.894	0.034	0.66902	1544.86	40.5041	3589.23	150.944	5079.41	193.177	1250.37	35.154	0	2.81148
NIST612_20	33.64	1.3	0.2685	0.0056	0.47771	3.72439	0.0776783	0.903	0.032	0.57726	1533.18	31.977	3599.54	139.102	5093.57	180.503	1241.98	27.0848	0	2.18078
NIST612_21	32.86	1.4	0.2667	0.0067	0.51493	3.74953	0.0941952	0.892	0.032	0.53786	1524.03	38.2865	3576.42	152.373	5076.24	182.107	1176.3	32.1022	0	2.72908
NIST612_22	32.86	1.3	0.2748	0.0066	0.55185	3.63901	0.0873998	0.882	0.032	0.61464	1565.12	37.5902	3576.42	141.489	5060.29	183.593	1166.87	30.976	0	2.65461
NIST612_23	32.66	1.4	0.2697	0.0071	0.53777	3.70782	0.0976105	0.88	0.033	0.62701	1539.28	40.5224	3570.4	153.048	5057.07	189.64	1154.19	33.6941	0	2.91929
NIST612_24	33.27	1.3	0.2644	0.0069	0.63063	3.78215	0.098702	0.91	0.031	0.61027	1512.31	39.4666	3588.64	140.223	5104.49	173.889	994.283	31.0331	0	3.12115
NIST612_25	33.01	1.3	0.2715	0.007	0.37805	3.68324	0.0949639	0.882	0.032	0.7096	1548.41	39.9222	3580.91	141.023	5060.29	183.593	1304.8	35.3084	0	2.70605
NIST612_26	33.09	1.3	0.2699	0.0061	0.47147	3.70508	0.0837383	0.892	0.029	0.61435	1540.29	34.8121	3583.29	140.776	5076.24	165.035	1237.72	29.7022	0	2.39975
NIST612_27	33.13	1.3	0.2652	0.0063	0.45141	3.77074	0.0895764	0.91	0.032	0.68392	1516.39	36.0229	3584.48	140.653	5104.49	179.498	1219.59	31.0883	0	2.54908
NIST612_28	32.58	1.3	0.2688	0.0071	0.62029	3.72024	0.0982652	0.897	0.031	0.51644	1534.71	40.5373	3567.99	142.369	5084.15	175.706	1030.13	32.155	0	3.12146
NIST612_29	33.39	1.3	0.2691	0.0082	0.52519	3.71609	0.113237	0.905	0.035	0.70462	1536.23	46.812	3592.19	139.858	5096.7	197.11	1063.15	40.036	0	3.7658
NIST612_30	33.3	1.5	0.2645	0.0084	0.53321	3.78072	0.120068	0.903	0.036	0.51898	1512.82	48.0443	3589.53	161.69	5093.57	203.066	1079.04	40.5145	0	3.75467
NIST612_31	33.67	1.4	0.2721	0.0085	0.51933	3.67512	0.114805	0.915	0.036	0.71387	1551.45	48.4651	3600.42	149.706	5112.23	201.137	1101.52	41.3907	0	3.75759
NIST612_32	33.13	1.4	0.2724	0.0077	0.60184	3.67107	0.103771	0.887	0.032	0.65153	1552.97	43.8983	3584.48	151.472	5068.29	182.847	1058.99	35.3403	0	3.33718
NIST612_33	33.11	1.5	0.2719	0.008	0.62321	3.67782	0.108211	0.884	0.035	0.55732	1550.44	45.6179	3583.89	162.363	5063.49	200.478	1048.06	36.0175	0	3.4366
NIST612_34	33.17	1.4	0.2727	0.0085	0.57545	3.66703	0.114301	0.897	0.034	0.72926	1554.49	48.4532	3585.67	151.34	5084.15	192.71	1041.62	40.1204	0	3.85174
NIST612_35	33.43	1.3	0.2684	0.0076	0.52573	3.72578	0.105499	0.916	0.034	0.66619	1532.68	43.3992	3593.37	139.736	5113.77	189.812	1091.14	36.8464	0	3.37687
NIST612_36	33.85	1.4	0.2681	0.0086	0.6126	3.72995	0.119648	0.911	0.032	0.63321	1531.15	49.1156	3605.68	149.127	5106.04	179.356	943.73	39.8384	0	4.22138
NIST612_37	33.47	1.4	0.2713	0.0062	0.47641	3.68596	0.0842349	0.904	0.032	0.57265	1547.4	35.3626	3594.55	150.355	5095.14	180.359	1253.32	29.992	0	2.39301
NIST612_38	34.35	1.4	0.2754	0.0068	0.45708	3.63108	0.0896563	0.915	0.033	0.61341	1568.15	38.7198	3620.14	147.546	5112.23	184.375	1259.59	33.2978	0	2.64354
NIST612_39	34.23	1.4	0.273	0.0077	0.49484	3.663	0.103316	0.915	0.035	0.66334	1556.01	43.8875	3616.69	147.922	5112.23	195.55	1167.53	37.5735	0	3.21821
NIST612_40	33.01	1.5	0.2684	0.0073	0.63378	3.72578	0.101335	0.887	0.032	0.4838	1532.68	41.686	3580.91	162.719	5068.29	182.847	1063.73	32.3376	0	3.04003
NIST612_41	33.38	1.3	0.2722	0.0071	0.54354	3.67377	0.0958257	0.892	0.033	0.65733	1551.96	40.4809	3591.89	139.888	5076.24	187.798	1122.82	33.7973	0	3.01004
NIST612_42	33.57	1.5	0.2709	0.0075	0.65266	3.6914	0.102198	0.91	0.032	0.52036	1545.37	42.7843	3597.49	160.746	5104.49	179.498	1035.95	32.7397	0	3.16035
NIST612_43	34.58	1.3	0.2688	0.0074	0.2858	3.72024	0.102417	0.944	0.038	0.78249	1534.71	42.2501	3626.73	136.343	5156.26	207.561	1368.22	37.9649	0	2.77477
NIST612_44	33.52	1.4	0.276	0.0074	0.53465	3.62319	0.0971435	0.896	0.032	0.49699	1571.19	42.126	3596.02	150.192	5082.57	181.52	1166.37	35.2003	0	3.01792
WRS_1	0.688	0.033	0.0845	0.0016	0.28318	11.8343	0.224082	0.0587	0.0025	0.2965	522.927	9.90158	531.598	25.4982	555.987	23.6792	523.758	9.32403	0.373789	1.78022
WRS_2	0.707	0.04	0.0858	0.0018	0.1301	11.655	0.244511	0.0596	0.003	0.32945	530.65	11.1325	542.963	30.7193	589.083	29.6519	532.246	10.1848	0.322559	1.91355
WRS_3	0.681	0.043	0.0858	0.0014	0.20925	11.655	0.190175	0.0577	0.0035	0.12066	530.65	8.65862	527.379	33.3	518.389	31.4447	530.529	8.25822	0.797697	1.5566
WRS_4	0.659	0.038	0.0836	0.0019	0.24083	11.9617	0.271857	0.058	0.0033	0.27557	517.575	11.7631	514.002	29.639	529.762	30.1416	517.147	10.9556	0.758584	2.11847
WRS_5	0.685	0.037	0.0855	0.0021	0.29955	11.6959	0.287268	0.0586	0.0029	0.25929	528.868	12.9898	529.792	28.6165	552.267	27.3306	529.005	12.0342	0.933256	2.27488
WRS_6	0.668	0.035	0.0851	0.0021	0.10027	11.7509	0.289975	0.056	0.0028	0.37254	526.492	12.9922	519.496	27.2191	452.368	22.6184	524.858	11.2015	0.552179	2.1342
WRS_7	0.637	0.037	0.0842	0.0019	0.24237	11.8765	0.267997	0.0541	0.0031	0.29596	521.144	11.7598	500.447	29.0684	375.215	21.5003	518.501	10.9195	0.0696231	2.10597
WRS_8	0.672	0.04	0.084	0.0019	0.069517	11.9048	0.269274	0.0582	0.0035	0.40027	519.954	11.7609	521.928	31.0671	537.299	32.3118	520.269	10.5055	0.879738	2.01925
WRS_9	0.677	0.036	0.0855	0.0019	0.031702	11.6959	0.259909	0.0592	0.0032	0.38105	528.868	11.7526	524.96	27.9151	574.459	31.0518	528.069	10.1423	0.74662	1.92063
WRS_10	0.71	0.047	0.0865	0.0018	0.10174	11.5607	0.240569	0.0599	0.0041	0.30719	534.804	11.1289	544.746	36.0607	599.964	41.066	535.789	10.2854	0.492389	1.91967
WRS_11	0.669	0.046	0.0863	0.0021	0.26095	11.5875	0.281967	0.0561	0.0035	0.15608	533.618	12.9849	520.104	35.762	456.328	28.4697	532.429	12.23	0.323096	2.29701
WRS_12	0.685	0.04	0.0855	0.0021	0.2015	11.6959	0.287268	0.0586	0.0033	0.39899	528.868	12.9898	529.792	30.9368	552.267	31.1004	529.011	11.8704	0.940667	2.24388
WRS_13	0.673	0.036	0.0833	0.002	0.079534	12.0048	0.288231	0.0597	0.0033	0.3622	515.79	12.3839	522.535	27.9513	592.719	32.7633	517.192	10.7949	0.575415	2.08722
WRS_14	0.666	0.039	0.0852	0.0024	0.29322	11.7371	0.330622	0.0568	0.003	0.26564	527.087	14.8475	518.277	30.3496	483.777	25.5516	525.454	13.561	0.459069	2.58081
WRS_15	0.714	0.042	0.0846	0.0019	0.12168	11.8203	0.265468	0.0599	0.0037	0.3138	523.521	11.7576	547.119	32.1835	599.964	37.0596	526.659	10.7336	0.072398	2.03805
WRS_16	0.719	0.046	0.0871	0.0021	0.015198	11.4811	0.276811	0.0578	0.0039	0.41919	538.363	12.9801	550.076	35.1926	522.189	35.2342	540.327	11.4005	0.432331	2.10992
WRS_17	0.636	0.037	0.0869	0.0023	0.18206	11.5075	0.304571	0.0551	0.0033	0.31779	537.177	14.2176	499.827	29.078	416.283	24.9317	528.742	12.5152	0.00203458	2.36697
WRS_18	0.681	0.039	0.0854	0.002	0.26811	11.7096	0.27423	0.0582	0.0031	0.31845	528.275	12.3718	527.379	30.2023	537.299	28.619	528.166	11.536	0.938858	2.18417
WRS_19	0.682	0.041	0.0868	0.0023	0.12425	11.5207	0.305273	0.0573	0.0033	0.3487	536.584	14.2182	527.982	31.7409	503.098	28.9742	534.831	12.5173	0.518822	2.34042
WRS_20	0.665	0.037	0.0839	0.0021	0.078008	11.919	0.298329	0.0562	0.0032	0.40679	519.36	12.9995	517.668	28.8026	460.278	26.208	518.994	11.2703	0.891959	2.17157
WRS_21	0.65	0.033	0.0856	0.0018	0.27071	11.6822	0.245655	0.0561	0.0028	0.21727	529.462	11.1336	508.479	25.8151	456.328	22.7757	526.493	10.3092	0.0365521	1.95809
WRS_22	0.651	0.039	0.0844	0.0021	-0.084299	11.8483	0.294805	0.0561	0.0033	0.46896	522.333	12.9964	509.094	30.4987	456.328	26.8428	519.233	10.6511	0.341789	2.05131
WRS_23	0.684	0.041	0.0857	0.0026	0.10005	11.6686	0.354007	0.058	0.0034	0.37078	530.056	16.081	529.189	31.7204	529.762	31.055	529.831	13.655	0.950268	2.57723
WRS_24	0.682	0.037	0.0856	0.0017	0.2171	11.6822	0.232007	0.0586	0.0031	0.28555	529.462	10.515	527.982	28.6442	552.267	29.2155	529.306	9.81359	0.894947	1.85405
WRS_25	0.692	0.042	0.0848	0.0022	0.37109	11.7925	0.305936	0.0608	0.0036	0.15543	524.71	13.6128	534.001	32.4105	632.166	37.4309	525.488	12.9192	0.434723	2.45851
WRS_26	0.658	0.042	0.0847	0.0021	0.29295	11.8064	0.29272	0.0574	0.0033	0.10989	524.116	12.9946	513.39	32.7696	506.935	29.1443	523.034	12.2257	0.390443	2.33746
WRS_27	0.654	0.036	0.0855	0.0022	0.15085	11.6959	0.300947	0.0562	0.003	0.43408	528.868	13.6083	510.937	28.125	460.278	24.57	524.796	11.9038	0.131722	2.26828
WRS_28	0.653	0.041	0.0839	0.0022	0.065537	11.919	0.312535	0.057	0.0035	0.40244	519.36	13.6185	510.323	32.0417	491.533	30.1819	517.568	11.8955	0.51154	2.29835
WRS_29	0.663	0.038	0.0828	0.0016	0.3791	12.0773	0.233378	0.0591	0.003	0.088522	512.814	9.90945	516.447	29.6003	570.782	28.9737	512.866	9.52047	0.735607	1.85633
WRS_30	0.674	0.039	0.0851	0.0024	0.077951	11.7509	0.3314	0.0582	0.0034	0.37625	526.492	14.8482	523.142	30.2708	537.299	31.3886	525.655	12.6103	0.80128	2.39897
WRS_31	0.688	0.046	0.0836	0.0023	0.30293	11.9617	0.329091	0.0598	0.0038	0.20097	517.575	14.2395	531.598	35.5429	596.346	37.8949	518.929	13.4284	0.299795	2.58772
WRS_32	0.691	0.045	0.0845	0.0022	0.36713	11.8343	0.308113	0.0581	0.0035	0.13179	522.927	13.6147	533.401	34.7367	533.535	32.1407	523.571	12.9818	0.410376	2.47948
WRS_33	0.685	0.039	0.0845	0.0019	0.21414	11.8343	0.266097	0.0583	0.003	0.26523	522.927	11.7581	529.792	30.1633	541.054	27.8416	523.773	10.9026	0.56494	2.08155
WRS_34	0.682	0.034	0.0836	0.0019	-0.041175	11.9617	0.271857	0.0592	0.0034	0.53996	517.575	11.7631	527.982	26.3217	574.459	32.9926	520.069	9.74034	0.383903	1.87289
WRS_35	0.67	0.043	0.0856	0.0019	0.09775	11.6822	0.259302	0.0583	0.0037	0.37776	529.462	11.7521	520.712	33.4189	541.054	34.3379	528.304	10.6879	0.522354	2.02306
WRS_36	0.664	0.044	0.085	0.0023	0.099388	11.7647	0.318339	0.0574	0.0035	0.31571	525.898	14.2302	517.058	34.2629	506.935	30.9106	524.289	12.6229	0.539362	2.40761
WRS_37	0.658	0.041	0.0835	0.0021	0.33283	11.976	0.301194	0.058	0.0035	0.1651	516.98	13.0019	513.39	31.9893	529.762	31.9684	516.655	12.3047	0.764809	2.38161
WRS_38	0.667	0.038	0.0826	0.002	0.19482	12.1065	0.293137	0.0587	0.0032	0.36037	511.623	12.388	518.887	29.5618	555.987	30.3094	512.733	11.3317	0.543962	2.21006
WRS_39	0.689	0.04	0.0834	0.0024	0.36228	11.9904	0.345048	0.0608	0.0034	0.14762	516.385	14.86	532.199	30.8969	632.166	35.3514	518.652	13.8819	0.173261	2.67653
WRS_40	0.658	0.039	0.0841	0.0022	-0.00092751	11.8906	0.31105	0.0564	0.0036	0.45246	520.549	13.6172	513.39	30.4289	468.149	29.8819	518.884	11.457	0.598437	2.208
WRS_41	0.691	0.039	0.0827	0.0022	0.50983	12.0919	0.321671	0.0603	0.0029	0.068435	512.219	13.6261	533.401	30.1051	614.357	29.5462	512.823	13.0847	0.0376107	2.5515
WRS_42	0.697	0.039	0.0848	0.002	0.061791	11.7925	0.278124	0.0602	0.0035	0.38872	524.71	12.3752	536.997	30.0472	610.771	35.5099	527.019	10.8617	0.337557	2.06097
WRS_43	0.679	0.035	0.0856	0.002	0.007721	11.6822	0.27295	0.0577	0.0032	0.52238	529.462	12.3706	526.17	27.1222	518.389	28.7495	528.677	10.3861	0.78527	1.96455
WRS_44	0.681	0.037	0.0856	0.0017	0.19712	11.6822	0.232007	0.0586	0.003	0.30736	529.462	10.515	527.379	28.6535	552.267	28.2731	529.228	9.7691	0.853831	1.84592
Pleso_1	0.391	0.017	0.05415	0.0007	0.19393	18.4672	0.238727	0.052	0.002	0.299	339.95	4.39455	335.1	14.5696	285.41	10.9773	339.69	4.22999	0.429957	1.24525
Pleso_2	0.387	0.02	0.05362	0.0008	0.28837	18.6498	0.278251	0.052	0.0025	0.15147	336.708	5.02362	332.176	17.1667	285.41	13.7216	336.63	4.88875	0.517462	1.45226
Pleso_3	0.395	0.017	0.0541	0.0011	0.31159	18.4843	0.375836	0.0528	0.0021	0.34374	339.644	6.90589	338.015	14.5475	320.212	12.7357	339.429	6.53404	0.787672	1.92501
Pleso_4	0.3954	0.016	0.0547	0.0011	0.41058	18.2815	0.367636	0.0523	0.0019	0.44708	343.313	6.90391	338.306	13.6897	298.548	10.8459	342.742	6.61068	0.352623	1.92876
Pleso_5	0.3932	0.016	0.055	0.0011	0.092486	18.1818	0.363636	0.0528	0.0024	0.50084	345.146	6.90292	336.704	13.7011	320.212	14.5551	343.207	6.03781	0.189858	1.75923
Pleso_6	0.397	0.016	0.05432	0.00066	0.20628	18.4094	0.223679	0.0532	0.002	0.23342	340.99	4.1431	339.47	13.6814	337.336	12.6818	340.913	3.99409	0.791371	1.17159
Pleso_7	0.401	0.018	0.05479	0.00087	0.17773	18.2515	0.289812	0.053	0.0022	0.41893	343.863	5.46013	342.373	15.3684	328.797	13.6482	343.726	5.17717	0.821129	1.50619
Pleso_8	0.3945	0.015	0.05461	0.00091	0.3635	18.3117	0.305138	0.0518	0.0018	0.40061	342.762	5.71166	337.651	12.8385	276.591	9.61128	342.328	5.49379	0.319896	1.60483
Pleso_9	0.393	0.017	0.05396	0.00092	0.34386	18.5322	0.315969	0.0533	0.002	0.38959	338.788	5.77622	336.559	14.5585	341.589	12.8176	338.662	5.58813	0.703227	1.65006
Pleso_10	0.395	0.017	0.05411	0.00076	-0.023164	18.4809	0.259572	0.052	0.0021	0.48489	339.705	4.77132	338.015	14.5475	285.41	11.5262	339.487	4.31633	0.799525	1.27143
Pleso_11	0.3961	0.016	0.0545	0.0011	0.20029	18.3486	0.370339	0.0522	0.002	0.5668	342.09	6.90457	338.816	13.6861	294.181	11.2713	341.439	6.27201	0.591595	1.83693
Pleso_12	0.4075	0.016	0.05512	0.00068	0.29371	18.1422	0.223816	0.0535	0.0018	0.27872	345.879	4.26701	347.073	13.6274	350.061	11.7778	345.91	4.14473	0.829136	1.19821
Pleso_13	0.3925	0.016	0.05489	0.00085	0.50164	18.2183	0.282119	0.0529	0.0018	0.10982	344.474	5.33435	336.194	13.7047	324.51	11.0419	344.733	5.18452	0.100096	1.50392
Pleso_14	0.407	0.017	0.0552	0.0011	0.46244	18.1159	0.361006	0.0541	0.002	0.24956	346.368	6.90226	346.712	14.4818	375.215	13.8712	346.388	6.68931	0.949726	1.93116
Pleso_15	0.4056	0.016	0.05403	0.00084	0.29175	18.5082	0.287746	0.0544	0.0019	0.3699	339.216	5.27377	345.702	13.6371	387.646	13.5391	339.676	5.07496	0.247921	1.49406
Pleso_16	0.401	0.019	0.0543	0.0013	0.47351	18.4162	0.440904	0.0532	0.0022	0.27442	340.867	8.16073	342.373	16.2222	337.336	13.95	340.981	7.89486	0.805324	2.31534
Pleso_17	0.393	0.021	0.0532	0.0011	0.52304	18.797	0.38866	0.0535	0.0025	0.087488	334.138	6.90887	336.559	17.984	350.061	16.358	334.016	6.70031	0.712252	2.00599
Pleso_18	0.4021	0.016	0.05508	0.0007	0.17777	18.1554	0.230733	0.0527	0.0019	0.43454	345.635	4.3926	343.17	13.6551	315.902	11.3893	345.461	4.19773	0.670985	1.21511
Pleso_19	0.4002	0.015	0.0544	0.0013	0.25179	18.3824	0.439284	0.0525	0.002	0.54189	341.479	8.16034	341.793	12.8108	307.249	11.7047	341.573	7.12394	0.957289	2.08563
Pleso_20	0.389	0.018	0.0551	0.0013	0.41895	18.1488	0.428194	0.0515	0.0023	0.37324	345.757	8.15761	333.639	15.4383	263.273	11.7578	344.124	7.7744	0.0458523	2.25919
Pleso_21	0.4	0.017	0.0544	0.0012	0.30607	18.3824	0.405493	0.0536	0.002	0.39185	341.479	7.53262	341.648	14.52	354.281	13.2194	341.508	7.02045	0.977954	2.05572
Pleso_22	0.409	0.018	0.0552	0.0011	0.40847	18.1159	0.361006	0.0537	0.0019	0.22242	346.368	6.90226	348.155	15.3222	358.489	12.684	346.487	6.6728	0.764595	1.92584
Pleso_23	0.397	0.018	0.05428	0.00077	0.45715	18.423	0.261343	0.0529	0.0019	0.10894	340.745	4.83371	339.47	15.3916	324.51	11.6554	340.801	4.68049	0.827435	1.37338
Pleso_24	0.397	0.017	0.054	0.0013	0.52288	18.5185	0.445816	0.0536	0.002	0.33228	339.033	8.1619	339.47	14.5365	354.281	13.2194	339.078	7.87284	0.934478	2.32184
Pleso_25	0.399	0.018	0.0541	0.0012	0.35776	18.4843	0.410003	0.0527	0.0022	0.47145	339.644	7.5337	340.923	15.38	315.902	13.1876	339.804	7.17046	0.837845	2.11017
Pleso_26	0.4013	0.016	0.05469	0.00075	0.10825	18.2849	0.250753	0.0532	0.0019	0.50943	343.251	4.70723	342.591	13.6592	337.336	12.0477	343.181	4.40384	0.91225	1.28324
Pleso_27	0.3934	0.016	0.05462	0.00094	0.27399	18.3083	0.315083	0.0522	0.002	0.3786	342.824	5.89993	336.85	13.7001	294.181	11.2713	342.152	5.59986	0.297733	1.63666
Pleso_28	0.3993	0.016	0.0549	0.0011	0.52042	18.2149	0.364962	0.05231	0.0017	0.40573	344.535	6.90325	341.14	13.6695	298.985	9.71657	344.373	6.70542	0.493836	1.94714
Pleso_29	0.403	0.016	0.05521	0.00083	-0.045586	18.1127	0.272297	0.0536	0.0022	0.58512	346.429	5.20804	343.822	13.6505	354.281	14.5414	345.98	4.56273	0.684649	1.31878
Pleso_30	0.399	0.017	0.05517	0.00095	0.28948	18.1258	0.312117	0.052	0.002	0.37289	346.185	5.96113	340.923	14.5255	285.41	10.9773	345.706	5.70088	0.380235	1.64906
Pleso_31	0.399	0.017	0.05471	0.0008	0.58638	18.2782	0.267274	0.0531	0.0017	0.16242	343.374	5.021	340.923	14.5255	333.072	10.6633	343.639	4.76147	0.632501	1.3856
Pleso_32	0.388	0.017	0.05383	0.00083	0.51028	18.577	0.286437	0.053	0.0021	0.10688	337.993	5.21148	332.907	14.5861	328.797	13.0278	338.27	5.0431	0.343643	1.49085
Pleso_33	0.406	0.018	0.05552	0.00098	0.051419	18.0115	0.317927	0.0533	0.0025	0.40029	348.323	6.14834	345.991	15.3395	341.589	16.022	347.944	5.53723	0.739337	1.59141
Pleso_34	0.4	0.017	0.055	0.0012	0.46814	18.1818	0.396694	0.0533	0.002	0.33074	345.146	7.53046	341.648	14.52	341.589	12.8176	344.81	7.25654	0.52446	2.1045
Pleso_35	0.402	0.018	0.0548	0.001	0.042894	18.2482	0.332996	0.0532	0.0022	0.19626	343.924	6.27598	343.098	15.3626	337.336	13.95	343.784	5.62142	0.907082	1.63516
Pleso_36	0.399	0.02	0.0539	0.0011	0.34391	18.5529	0.37863	0.0541	0.0023	0.31454	338.421	6.90655	340.923	17.0889	375.215	15.9518	338.574	6.67526	0.716063	1.97158
Pleso_37	0.4008	0.016	0.0546	0.001	0.26142	18.315	0.33544	0.0536	0.0021	0.51852	342.701	6.27658	342.228	13.6618	354.281	13.8804	342.635	5.89327	0.935038	1.71998
Pleso_38	0.402	0.017	0.0538	0.0013	0.32448	18.5874	0.449137	0.0542	0.0021	0.30729	337.809	8.16268	343.098	14.5091	379.369	14.6988	338.899	7.53506	0.390613	2.22339
Pleso_39	0.3959	0.015	0.05456	0.00089	0.15285	18.3284	0.298979	0.0536	0.0019	0.60516	342.457	5.58626	338.67	12.8317	354.281	12.5585	341.858	5.13309	0.506813	1.50153
Pleso_40	0.398	0.017	0.05402	0.00075	0.29642	18.5117	0.257011	0.0538	0.002	0.32056	339.155	4.70874	340.197	14.531	362.687	13.4828	339.187	4.57303	0.860274	1.34823
Pleso_41	0.3998	0.016	0.05509	0.00094	0.35742	18.1521	0.309729	0.0534	0.002	0.39037	345.696	5.8986	341.503	13.667	345.831	12.9525	345.371	5.68065	0.443252	1.6448
Pleso_42	0.3992	0.016	0.0546	0.0011	0.53009	18.315	0.368984	0.0533	0.0019	0.34759	342.701	6.90424	341.068	13.6701	341.589	12.1767	342.636	6.71238	0.740246	1.95904
Pleso_43	0.405	0.018	0.0553	0.001	0.14547	18.0832	0.327002	0.0526	0.0022	0.51543	346.979	6.27448	345.268	15.3452	311.581	13.0319	346.738	5.80404	0.800435	1.6739
Pleso_44	0.395	0.019	0.0536	0.0013	0.47038	18.6567	0.452495	0.0539	0.0022	0.30413	336.586	8.16346	338.015	16.259	366.874	14.9744	336.694	7.8992	0.816149	2.34611
91500_1	1.755	0.092	0.1792	0.0037	0.35724	5.58036	0.115219	0.0703	0.0033	0.15139	1062.6	21.9399	1029.01	53.9422	937.128	43.9904	1057.03	19.5217	0.0375924	1.84684
91500_2	1.832	0.11	0.179	0.0053	0.46482	5.58659	0.165413	0.0749	0.0038	0.13897	1061.51	31.4302	1057	63.466	1065.82	54.0736	1060.45	27.7006	0.804492	2.61215
91500_3	1.876	0.083	0.1795	0.0038	0.33493	5.57103	0.117938	0.0771	0.0031	0.32627	1064.24	22.5299	1072.65	47.4574	1123.78	45.1843	1066.38	19.3305	0.572156	1.81272
91500_4	1.81	0.083	0.1785	0.0036	0.17634	5.60224	0.112986	0.0739	0.003	0.33988	1058.77	21.3534	1049.08	48.1069	1038.74	42.168	1056.2	17.6704	0.553916	1.67302
91500_5	1.893	0.093	0.179	0.0033	0.099033	5.58659	0.102993	0.0772	0.0038	0.3467	1061.51	19.5697	1078.64	52.9916	1126.36	55.4426	1065.03	16.4556	0.339837	1.54509
91500_6	1.784	0.083	0.1782	0.0037	0.33721	5.61167	0.116516	0.0734	0.0032	0.3175	1057.13	21.9495	1039.64	48.3689	1025.02	44.6874	1053.12	19.0466	0.244453	1.80858
91500_7	1.841	0.09	0.1786	0.0043	0.25008	5.5991	0.134805	0.0735	0.0033	0.36631	1059.32	25.5044	1060.22	51.8303	1027.77	46.1448	1059.59	21.0656	0.958885	1.98809
91500_8	1.862	0.086	0.1787	0.0038	0.22923	5.59597	0.118997	0.0761	0.0033	0.38438	1059.87	22.5378	1067.7	49.3136	1097.7	47.6008	1061.94	18.874	0.633261	1.77731
91500_9	1.828	0.095	0.1798	0.0049	0.34908	5.56174	0.151571	0.0734	0.0035	0.3101	1065.88	29.0479	1055.56	54.8569	1025.02	48.8769	1062.53	24.231	0.557309	2.28049
91500_10	1.869	0.086	0.1802	0.0036	0.31521	5.54939	0.110865	0.0756	0.0031	0.29596	1068.07	21.3376	1070.18	49.243	1084.5	44.4701	1068.51	18.5732	0.890369	1.73823
91500_11	1.848	0.078	0.1789	0.004	0.22322	5.58971	0.12498	0.0748	0.0031	0.41692	1060.96	23.7219	1062.72	44.8549	1063.13	44.0603	1061.57	18.9441	0.910781	1.78453
91500_12	1.811	0.11	0.175	0.0048	0.38993	5.71429	0.156735	0.0753	0.0036	0.17635	1039.6	28.5148	1049.44	63.7429	1076.52	51.4671	1041.49	25.2817	0.607251	2.42745
91500_13	2.07	0.15	0.1815	0.0077	0.43342	5.50964	0.233742	0.0804	0.0047	0.27724	1075.16	45.613	1138.93	82.5313	1206.82	70.5478	1095.81	38.6549	0.0104974	3.52752
91500_14	1.91	0.09	0.1768	0.004	0.4097	5.65611	0.127966	0.0769	0.0033	0.30108	1049.47	23.7436	1084.58	51.1061	1118.6	48.0022	1056.62	20.9978	0.0207157	1.98727
91500_15	1.898	0.091	0.1821	0.0038	0.3237	5.49149	0.114595	0.0756	0.0032	0.2925	1078.44	22.5044	1080.39	51.7995	1084.5	45.9047	1078.85	19.5962	0.902691	1.8164
91500_16	1.887	0.098	0.182	0.0041	0.35957	5.49451	0.123777	0.0758	0.0036	0.17727	1077.89	24.2822	1076.53	55.9087	1089.79	51.758	1077.62	21.3547	0.935389	1.98165
91500_17	1.896	0.084	0.181	0.0052	0.31838	5.52486	0.158725	0.0744	0.0035	0.43197	1072.44	30.8103	1079.69	47.8343	1052.34	49.5051	1075.85	23.4981	0.667866	2.18415
91500_18	1.825	0.1	0.179	0.0034	0.39664	5.58659	0.106114	0.0732	0.0034	0.18009	1061.51	20.1627	1054.48	57.7799	1019.49	47.3536	1060.98	18.4245	0.671943	1.73655
91500_19	1.884	0.096	0.1822	0.0044	-0.056939	5.48847	0.132543	0.0753	0.0043	0.51862	1078.98	26.0566	1075.47	54.8011	1076.52	61.4746	1077.77	19.0156	0.86884	1.76434
91500_21	1.859	0.081	0.1782	0.0029	0.16085	5.61167	0.0913235	0.075	0.0031	0.37792	1057.13	17.2036	1066.63	46.4751	1068.5	44.1647	1058.93	14.7711	0.535147	1.39491
91500_22	1.899	0.098	0.1817	0.0045	0.26303	5.50358	0.136302	0.0787	0.0038	0.37539	1076.26	26.6546	1080.74	55.7727	1164.6	56.2323	1077.53	22.2453	0.806506	2.06448
91500_23	1.833	0.096	0.1773	0.004	0.35166	5.64016	0.127246	0.0747	0.0034	0.20781	1052.21	23.7385	1057.36	55.377	1060.44	48.2664	1053.17	20.9672	0.760152	1.99086
91500_24	1.891	0.092	0.1822	0.0035	0.054651	5.48847	0.105432	0.0746	0.0034	0.40403	1078.98	20.7269	1077.93	52.4431	1057.74	48.2082	1078.72	16.8129	0.954298	1.55859
91500_25	1.829	0.083	0.1789	0.0028	0.10515	5.58971	0.0874858	0.0734	0.003	0.34818	1060.96	16.6053	1055.92	47.9177	1025.02	41.8944	1060.04	14.1522	0.752503	1.33506
91500_26	1.8	0.12	0.1778	0.0041	0.15474	5.6243	0.129694	0.075	0.005	0.30053	1054.94	24.3266	1045.46	69.6972	1068.5	71.2334	1053.33	21.0545	0.677522	1.99886
91500_27	1.813	0.09	0.1782	0.0045	0.40756	5.61167	0.141709	0.0735	0.0033	0.32786	1057.13	26.6953	1050.16	52.1316	1027.77	46.1448	1055.18	22.961	0.660213	2.17604
91500_28	1.77	0.14	0.1745	0.0066	-0.15395	5.73066	0.216747	0.0734	0.0063	0.59092	1036.86	39.2164	1034.52	81.8265	1025.02	87.9783	1036.03	27.3149	0.944533	2.6365
91500_29	1.842	0.095	0.1784	0.0027	0.29305	5.60538	0.0848348	0.0764	0.0036	0.17542	1058.23	16.0158	1060.58	54.6985	1105.57	52.095	1058.38	14.6115	0.886298	1.38055
91500_30	1.846	0.094	0.1799	0.0038	0.4688	5.55864	0.117414	0.0754	0.0031	0.26155	1066.43	22.526	1062	54.0782	1079.18	44.3696	1065.91	20.4596	0.768007	1.91946
91500_31	1.83	0.091	0.1785	0.0033	0.35471	5.60224	0.103571	0.0752	0.0033	0.23002	1058.77	19.574	1056.28	52.5254	1073.85	47.1238	1058.47	17.655	0.872809	1.66796
91500_32	1.879	0.098	0.179	0.0041	0.29186	5.58659	0.127961	0.0739	0.0039	0.2349	1061.51	24.3139	1073.71	55.9998	1038.74	54.8184	1064.17	21.0408	0.490768	1.97721
91500_33	1.826	0.075	0.1793	0.0041	0.35061	5.57724	0.127533	0.074	0.0029	0.52472	1063.15	24.3107	1054.84	43.326	1041.47	40.8143	1060.12	19.9038	0.557576	1.8775
91500_34	1.86	0.12	0.1784	0.0052	0.24289	5.60538	0.163385	0.0743	0.0048	0.41593	1058.23	30.8452	1066.99	68.8378	1049.63	67.809	1060.42	26.0931	0.6985	2.46064
91500_35	1.811	0.086	0.1792	0.003	0.32333	5.58036	0.0934212	0.0734	0.0031	0.25898	1062.6	17.7891	1049.44	49.8353	1025.02	43.2909	1061.03	16.0118	0.378978	1.50908
91500_36	1.86	0.086	0.1806	0.0032	0.2566	5.5371	0.0981103	0.0754	0.0032	0.30647	1070.25	18.9635	1066.99	49.3338	1079.18	45.8009	1069.68	16.603	0.833212	1.55215
91500_37	1.83	0.098	0.1791	0.0031	0.307	5.58347	0.096643	0.0753	0.0032	0.22089	1062.06	18.3829	1056.28	56.5658	1076.52	45.7485	1061.53	16.6623	0.733591	1.56966
91500_38	1.894	0.096	0.1805	0.0033	0.52782	5.54017	0.101288	0.0764	0.0032	-0.069142	1069.71	19.5569	1078.99	54.6899	1105.57	46.3067	1069.72	18.0204	0.518375	1.68458
91500_39	1.866	0.095	0.1777	0.0037	0.41629	5.62746	0.117173	0.0764	0.0035	0.19186	1054.4	21.9542	1069.11	54.4297	1105.57	50.6479	1056.22	19.8712	0.348627	1.88135
91500_40	1.854	0.088	0.1793	0.0043	0.40037	5.57724	0.133754	0.0751	0.0033	0.24914	1063.15	25.4966	1064.85	50.5432	1071.18	47.0691	1063.61	21.961	0.911654	2.06475
91500_41	1.771	0.085	0.1765	0.0031	0.11577	5.66572	0.0995113	0.0734	0.0035	0.33768	1047.83	18.4037	1034.89	49.6699	1025.02	48.8769	1045.2	15.5634	0.440816	1.48904
91500_42	1.843	0.084	0.1804	0.004	0.67502	5.54324	0.12291	0.0735	0.0027	0.18946	1069.16	23.7064	1060.93	48.3551	1027.77	37.7549	1068.52	21.7783	0.456892	2.03818
91500_43	1.894	0.095	0.1799	0.0034	0.19499	5.55864	0.105055	0.0759	0.0035	0.39054	1066.43	20.1548	1078.99	54.1202	1092.43	50.3758	1068.71	17.4523	0.472929	1.63303
91500_44	1.89	0.094	0.18	0.0039	0.08808	5.55556	0.12037	0.0767	0.0041	0.48985	1066.97	23.1178	1077.58	53.594	1113.4	59.5168	1069.87	18.6285	0.574579	1.74119

## Sheet: Apatite Trace element
Table 4. Apatite trace elements
Sample 1		Location: Bunatrahir West			Grid Coordinates: 54°18'31.6''N, -9°23'35.6''W
	Mn55	2σ	Sr88	2σ	Y89	2σ	Zr90	2σ	La139	2σ	Ce140	2σ	Pr141	2σ	Nd146	2σ	Sm147	2σ	Eu153	2σ	Gd157	2σ	Tb159	2σ	Dy163	2σ	Ho165	2σ	Er166	2σ	Tm169	2σ	Yb172	2σ	Lu175	2σ	Pb204	2σ	Pb206	2σ	Pb207	2σ	Pb208	2σ	Th232	2σ	U238	2σ
BTW02_0	882	43	283	12	3870	140	0.376	0.048	314	13	1186	59	213	11	1348	58	564	21	56	1.8	702	24	106.8	4	682	26	139.4	4.6	365	13	46.1	1.8	264.9	9.9	38.4	1.6	11.1	1.6	44.2	1.8	14.43	0.82	15.4	1	45.1	3.1	47	1.7
BTW02_1	554	19	538	26	583	24	1.4	0.12	755	32	2460	150	297	18	1194	58	198.4	9.3	58.1	2	152.6	7.2	18.34	0.76	101.9	5.3	20.41	0.93	59.3	2.7	8.32	0.45	55	2.5	9.25	0.36	2.83	0.79	99.9	4.1	13.87	0.55	14.09	0.8	85.4	5	94.6	3.5
BTW02_2	315.6	4.4	795	11	135.8	3.1	1.142	0.089	1296	23	1879	35	154.9	2.5	554	12	71.8	1.8	14.57	0.43	52.6	1.9	5.28	0.21	26.8	1.2	4.87	0.15	12.35	0.36	1.592	0.062	9.63	0.26	1.692	0.046	9.8	1.6	25.04	0.55	9.6	0.3	10.53	0.41	42.1	1.2	66.6	1.9
BTW02_3	948	37	159.2	6.6	2222	87	4.68	0.23	2580	100	5900	220	692	26	2990	120	564	21	103.7	2.9	519	14	64.2	2.1	372	13	76.1	2.5	221.2	7.3	28.87	0.93	178.9	5.8	28.65	0.8	5.3	1.3	93.2	2.2	14.36	0.36	37.3	1.5	261.4	9.5	101.9	2.5
BTW02_4	372	15	157.5	6.6	1497	50	0.169	0.027	123.3	5.4	770	49	156.7	7.3	994	45	304	14	14.21	0.56	315	13	44.6	1.8	271	12	54.6	2	148.1	7	17.7	0.77	99.5	4.1	14.27	0.52	4.5	1.1	17.31	0.74	6.57	0.3	5.91	0.33	6.73	0.41	12.83	0.48
BTW02_5	322	10	277.7	8.4	823	35	0.597	0.068	742	25	1992	78	242	12	967	44	181.9	6.6	37.2	1.3	152.9	5	19.24	0.62	121.7	5.1	25.2	0.84	74.7	3.1	11	0.43	74.1	3.1	12.14	0.44	3.55	0.88	58.9	1.8	10.26	0.36	18.07	0.89	107.7	5.7	55.9	2.1
BTW02_6	2042	67	229.5	9	1365	53	0.195	0.033	339	16	1433	57	263.8	9.2	1477	52	369	12	54.3	1.6	334	11	43.4	1.2	249.5	9.2	46.8	1.7	124	3.8	16.1	0.61	97.3	3.3	15.41	0.58	12.6	1.8	29.2	1.2	13.62	0.45	15.63	0.55	40.5	1.7	25.7	1
BTW02_7	367	13	345	16	1632	78	1.19	0.12	414	24	1674	99	266	15	1354	75	301	17	62	2.9	260	14	36.5	2	231	12	48.8	2.5	160.3	9.2	24.9	1.3	177	10	30.2	1.7	3.9	1.2	154.1	9.6	21.1	1.5	15.7	1.4	90.1	7.1	151.8	8.2
BTW02_8	415.4	7.9	260.6	5.3	1895	42	1.119	0.072	416	10	1862	39	322.7	9.7	1711	35	413.6	9.6	71.6	1.1	385.3	8.3	52.3	1.2	333.4	7.6	67.2	1.3	194	4.7	28.76	0.68	186.9	4.1	28.47	0.7	3.07	0.72	123.8	2.7	16.83	0.36	12.08	0.53	59.8	1.8	115.2	2
BTW02_9	346.3	7.4	315.4	5.6	1197	19	1.29	0.25	300.2	6	1113	18	188.8	3.8	1028	19	259.3	7.3	50.2	1	238.5	5.1	30.42	0.73	188.1	3.9	38.45	0.86	110.6	2.6	15.96	0.56	105.5	2.8	17.98	0.42	3.6	1.9	76.6	2.9	12.31	0.57	10.52	0.59	50.4	1.2	66.4	1.6
BTW02_10	278.4	7.2	489	14	489	13	1.322	0.093	420	13	1306	40	182.2	5.8	873	22	182.3	6.3	18.93	0.68	152.9	4.1	18.31	0.46	101.3	3.6	18.12	0.56	44.3	1.3	5.25	0.19	27.8	0.87	3.642	0.085	4.4	1.1	22.88	0.54	7.7	0.29	10.03	0.43	34.3	1.4	16.24	0.47
BTW02_11	296	10	198.3	6	1807	51	0.092	0.017	68.6	2.4	568	22	158.3	4.3	1112	29	370.3	8.8	51.2	1.5	379	11	50.5	1.1	309.1	7.6	61.7	1.5	175.7	4.9	24.29	0.52	147.6	4.2	20.14	0.53	5.9	1.2	28.69	0.74	8.53	0.6	6.9	0.64	6.32	0.31	24.5	0.4
BTW02_12	301	12	437	18	495	20	0.488	0.053	378	16	1268	59	184.1	7.2	850	37	159.9	7.1	35.1	1.4	134.8	5.5	15.02	0.79	85	5.5	15.77	0.64	42.8	1.5	6.22	0.29	40.7	1.5	7.35	0.34	5.4	1.3	63.8	2.1	11.14	0.42	9.2	0.61	38.7	1.9	58.6	2
BTW02_13	301	14	477	23	612	33	0.55	0.1	272	13	1083	47	186.2	8.7	1039	45	216.4	9.3	37.3	1.9	186.1	7.9	23.2	1.2	127.4	6	22.6	1.1	56.3	1.9	6.95	0.28	41.8	2	5.79	0.24	3.6	1	10.02	0.36	4.61	0.23	4.38	0.36	5.15	0.32	6.69	0.3
BTW02_14	461	14	349	12	517	19	2.19	0.12	321	12	1343	54	245.2	7.4	1405	47	291	10	58.1	2.1	229.8	8	23.8	0.7	116.1	4.3	20.44	0.76	47.6	2.1	4.99	0.19	23.8	0.74	3.13	0.1	1.67	0.67	3.87	0.16	2.52	0.12	3.33	0.23	8.85	0.38	1.803	0.06
BTW02_15	166.1	6.2	224.6	7.6	966	43	0.39	0.041	207.5	8.6	1110	44	194.1	7.1	1055	41	231.7	7.1	24.32	0.9	201.8	6.6	27.12	0.91	162.5	5.1	32.5	1.3	91.6	3.5	13.03	0.52	82	3	11.58	0.4	7.8	1.1	42	1.6	12.4	0.49	9.09	0.5	2.64	0.18	34.6	1.4
BTW02_16	244.8	5	417.2	8.1	1008	21	11.61	0.29	563	15	1512	33	206.9	5.3	1023	23	233.1	7	35	1	229.7	6.8	30.35	0.7	181.3	3.9	32.91	0.68	84.8	1.8	10.7	0.31	58.1	1.4	7.23	0.15	4.5	1.2	5.77	0.68	4.38	0.6	4.86	0.63	6.45	0.57	1.352	0.034
BTW02_17	426	14	289.6	9.4	852	34	0.582	0.053	1074	45	2960	140	372	21	1417	63	230.2	8	21.24	0.74	176.6	6.7	21.58	0.69	124.7	4.5	26.18	0.85	76.3	2.5	11.26	0.41	77	3.3	13.02	0.46	2.81	0.84	61.2	2.9	9.23	0.39	14.85	0.72	92.7	3.9	64.6	2.7
BTW02_18	326	12	222.3	7.8	1751	68	0.545	0.049	1017	37	3770	150	548	22	2431	99	487	17	90	2.7	393	11	50.6	1.7	319	11	61.8	2	170.6	4.8	23.79	0.89	146.9	5.2	20.22	0.57	5.63	0.98	46.6	1.3	9.21	0.28	9.9	0.4	50.2	1.9	58.7	1.5
BTW02_19	220.4	8.7	329	12	1574	48	1.3	0.11	418	18	1827	68	328	16	1706	57	411	15	42.8	1.5	391	14	50.8	1.6	300.6	9.1	57.9	2	152.6	4.2	20.6	0.59	118.4	3.4	16.89	0.41	3.69	0.84	46.8	1.5	8.14	0.33	4.05	0.36	4.74	0.26	48.4	1.1
BTW02_20	301	12	360	16	1128	38	0.21	0.028	153.5	7.5	773	37	144.4	6.8	831	30	239.8	8.3	27.7	1	234.7	9.1	31.8	1.2	199.2	6.8	39.6	1.3	113.5	4.1	15.8	0.63	99.5	3.5	15.94	0.51	4.9	1.2	27.72	0.82	6.67	0.19	4.65	0.22	4.47	0.27	24.2	0.89
BTW02_21	262.4	8.6	218.9	8.2	1775	66	0.736	0.061	421	16	1862	90	318	15	1693	72	398	14	52.9	2.3	366	15	50.7	1.8	310	13	64.1	2.6	184.2	7.3	27.7	1.2	186.2	6.3	27.6	1	3.04	0.91	66.7	2.1	9.17	0.31	5.59	0.31	25.5	1.1	68.6	2.3
BTW02_22	525.9	7.2	384.8	4.4	807.5	8.4	4.06	0.12	658	14	2320	34	363.8	6	1823	34	366.7	4.9	51.86	0.72	284	3.7	32.79	0.4	177.1	2.7	30.66	0.55	75.4	1.1	9.03	0.15	49.93	0.62	6.669	0.097	6.8	1.3	13.79	0.31	7.12	0.21	10.01	0.37	26.13	0.82	6.064	0.079
BTW02_23	355	12	161.3	5.7	775	32	0.094	0.018	471	18	1570	75	224	10	1053	47	192.7	7.5	35.3	1.7	169.9	6.7	20.29	0.84	119.8	5.1	24.04	0.98	67.4	3.2	9.38	0.4	65.2	2.7	10.97	0.49	4.9	1.2	19.18	0.84	6.25	0.19	7.81	0.38	22.9	1.6	14.96	0.89
BTW02_24	474.4	9.3	541	12	697	21	4.2	0.18	849	30	2840	110	432	14	2187	66	391	12	45.5	1.4	302.1	8.5	33.3	1.1	169.1	5.2	29.27	0.88	71.1	1.7	7.7	0.27	40.1	1.3	5.16	0.13	3.09	0.76	12.7	0.39	3.85	0.14	7.29	0.34	38	1.4	8.97	0.26
BTW02_25	264.5	4.9	735	14	193.6	8.7	3.26	0.96	180.1	6.9	547	20	73.1	2.5	358.6	8.7	75.3	2.5	13.82	0.54	68.1	2.7	8.11	0.37	44	2.2	7.4	0.36	17.66	0.79	2.098	0.093	12.02	0.5	1.631	0.065	15.5	2	55	1.3	19.2	0.52	20.94	0.77	55.4	2.5	37.46	0.86
BTW02_26	247.5	7.1	301	10	776	28	1.2	0.5	120.4	4.3	748	26	144.6	4.8	818	26	191.7	5.3	18.61	0.65	166.9	5.3	21.39	0.74	130.1	3.6	27.57	0.78	78.8	2.2	11.24	0.35	74.4	2.5	12.07	0.38	7	1.5	18.07	0.69	7.61	0.38	8.04	0.54	14.53	0.63	12.22	0.43
BTW02_27	415	20	302	17	2460	130	0.899	0.095	436	20	2116	97	441	19	2325	95	601	29	89.3	3.5	531	20	71.6	3.1	431	21	84	4.1	234	12	35.1	1.8	233	12	33.4	1.7	3.4	0.73	69.2	5	10.33	0.61	12.4	1	75.4	6.6	71.7	5.3
BTW02_28	389	15	157.2	6.6	2429	80	0.415	0.048	331	15	1789	58	378	15	2196	89	562	22	46.4	1.8	529	19	71	2.7	440	17	84.9	3.2	239.2	7.6	32.3	1.1	201.2	6.3	29.1	1	3.87	0.93	69.9	2.4	10.44	0.39	5.79	0.42	20	1.3	69.1	2.3
BTW02_29	265.1	5.1	480	19	310.2	8.7	0.548	0.075	122.4	3.6	467	15	76.2	2.4	408	13	103.3	3.6	24.53	0.69	97.3	2.4	11.68	0.38	62.8	2	11.28	0.39	28.09	0.93	3.58	0.12	22.02	0.75	3.78	0.13	6.6	1.3	40.8	1.3	10.08	0.44	10.95	0.54	41.9	1.3	32.84	0.81
BTW02_30	185.8	3.5	395	10	947	15	14.97	0.44	503.4	9.7	1414	27	188.8	3.3	920	14	214.2	3.2	27.96	0.58	209.4	3.3	29.4	0.56	184.5	3.1	34.63	0.76	92	1.8	11.87	0.28	65.1	1.4	8.24	0.21	3.5	1.4	15.15	0.27	6.58	0.3	7.79	0.4	22	1.8	6.56	0.33
BTW02_31	449.9	4.4	266.7	2.9	1389	18	1.88	0.18	405.1	5.5	1608	24	261.4	3.5	1377	19	318.3	6.1	75.3	1.2	289.5	3.1	38.17	0.62	234.4	4.2	47.19	0.86	135.8	2.4	19.57	0.33	128.8	2.5	19.72	0.37	7.3	1.9	164	2.9	25.3	1.2	17.5	1.1	67.5	1.3	150.3	2
BTW02_32	412.1	6.7	342.2	5.2	1455	21	1.86	0.16	334.3	4.9	1552	25	263.1	4.7	1379	21	310.3	6	74.8	1.5	270.4	5.7	37.29	0.77	233.1	4.8	47.74	0.97	150.1	3.2	23.69	0.6	173.2	4.4	26.93	0.59	4.6	1.1	99.2	1.5	15.91	0.4	9.56	0.43	33.3	0.96	97.7	2
BTW02_33	481	16	691	16	700	20	0.388	0.083	129.9	4.1	665	18	124.1	4.6	775	23	215	6.7	22.79	0.81	201.8	6.7	24.71	0.73	138.6	4	24.99	0.62	65.2	1.7	8.2	0.26	48.2	1.2	6.3	0.2	5.6	1.4	53.9	2.1	11.55	0.4	9.14	0.49	21.95	0.76	46.1	1.9
BTW02_34	287.5	9.1	268.3	9.8	1034	38	0.523	0.04	642	24	2240	100	331	15	1547	60	320.9	9.9	31	1.1	284.8	9.4	35.6	1.3	200.8	6.6	36.9	1.3	92.8	3.2	11.27	0.32	60.5	2.1	7.75	0.29	1.17	0.51	48.6	1.5	6.16	0.19	3.33	0.22	18.77	0.73	55.9	1.2
BTW02_35	173.4	2	859	13	543.8	8.1	1.11	0.33	741	9.9	2479	35	356	4.3	1632	24	285.7	4.6	15.41	0.35	204.9	3.7	21.91	0.36	112	2.1	19.31	0.3	48.96	0.93	6.27	0.12	35.78	0.78	4.88	0.11	4.61	0.98	87.7	4	14.58	0.56	22.46	0.86	128.3	6.1	75.7	3.6
BTW02_36	143.9	5	651	21	441	13	3.48	0.54	330	11	1090	43	165.9	5.3	836	24	176.5	5.6	27.5	1	147.5	3.7	17.22	0.45	91.9	2.7	16.16	0.51	40.7	1.3	4.9	0.17	27.73	0.97	3.73	0.14	19.4	3	27.8	1.8	19.3	1.5	20.3	1.7	15.5	1.5	7.13	0.2
BTW02_37	181.1	7.6	174.3	7.3	2140	96	1.87	0.16	840	36	3390	200	565	30	2750	140	622	28	67.9	3.1	517	17	69.8	2.4	409	16	77.8	3.6	206.1	7.5	28.56	0.96	175.5	7.4	24.63	0.88	6.1	1.1	49.1	1.8	10.47	0.49	9.17	0.59	31.4	2.5	44.3	1.1
BTW02_38	284.1	9.6	537	15	498	16	2.65	0.5	195.1	9.9	762	35	129.9	4.9	741	23	174.3	5.5	31.05	0.92	154	4.1	18.24	0.56	105.1	3.3	19.08	0.69	46.5	1.4	5.85	0.22	34	1.3	4.55	0.15	2.96	0.97	13.44	0.44	4.33	0.22	5.05	0.32	18.86	0.71	14.94	0.42
BTW02_39	427	16	235.5	7.9	1161	61	0.604	0.07	576	29	1970	99	284	12	1373	79	276	14	43.8	2.2	227	12	31.7	1.8	196	11	39	2.1	112.7	6.4	17.1	0.86	116.3	5.8	16.51	0.88	3.29	0.89	66.7	2.6	11.25	0.48	10.35	0.55	45.6	2.6	64	2.7
BTW02_40	202.5	4.1	176.3	4.1	646	20	0.27	0.14	288.5	7.1	1015	31	154.5	4.9	764	24	164.5	4.9	15.82	0.63	147	5.8	18.44	0.68	112.9	3.8	21.97	0.62	59.7	2.5	8.26	0.35	52.8	2.5	8.01	0.28	2.9	2	16.09	0.57	4.23	0.15	3.09	0.34	1.82	0.19	12.18	0.38
BTW02_41	575	19	303	9.2	662	24	0.154	0.031	243.5	9	761	31	114.2	5	593	19	165.6	6.3	26.94	0.91	164.6	5	20.27	0.67	112.3	3.3	22.12	0.65	57.3	1.5	7.26	0.26	44	1.5	7.24	0.19	3.2	0.9	38.28	0.93	7.19	0.23	5.53	0.25	17.35	0.57	35.83	0.85
BTW02_42	370	12	236	8.9	284	11	0.241	0.033	482	22	921	34	108	5.2	524	22	93.9	3.8	18.09	0.78	90	3.5	9.62	0.37	50.4	2.2	9.31	0.43	23.25	0.89	2.57	0.1	13.11	0.55	2.46	0.11	3.6	1	15.55	0.8	4.82	0.27	5.54	0.36	17.05	0.85	15.26	0.6
BTW02_43	376	12	665	23	246.1	7	0.49	0.046	397	15	1225	58	144	4.8	631	21	109.4	4.4	21.17	0.78	81.1	3.1	8.39	0.29	44.4	0.99	8.64	0.29	21.79	0.71	2.828	0.098	17.64	0.66	3.012	0.085	7.4	1.4	24.63	0.8	8.65	0.42	8.14	0.48	11.67	0.51	18.03	0.56
BTW02_44	327	12	259.5	8	1591	65	1.05	0.088	1010	46	2670	130	353	15	1503	70	314	12	51.2	1.9	285.5	9.2	38.7	1.4	237.1	8.3	48.1	1.6	141.7	3.9	21.11	0.76	143.9	5.4	24.52	0.65	5.94	0.82	80.2	2.5	13.7	0.45	27.43	0.94	163.1	7.4	71.2	2.5
BTW02_45	159.5	2.1	586.9	7.6	326.3	5.2	8.19	0.34	463.3	8.1	1204	22	161.9	3	756	12	145	2.6	23.49	0.42	114	1.8	12.98	0.31	69.3	1.4	12.11	0.25	28.9	0.52	3.458	0.095	18.97	0.46	2.444	0.049	2.1	0.73	5.867	0.095	2.688	0.076	3.61	0.14	9.74	0.25	3.306	0.053
BTW02_46	276.8	7.1	1443	51	228.2	7.6	4.99	0.18	393	13	1074	51	142.6	6	700	28	142.6	4.5	31.5	1.1	111.3	3.5	11.29	0.4	56.3	2.5	9.13	0.33	20.43	0.74	2.087	0.077	11.08	0.4	1.437	0.056	3.17	0.9	6.5	0.61	3.31	0.58	4.22	0.73	11.1	1.3	3.332	0.093
BTW02_47	329	11	218.2	9.9	1484	68	0.378	0.042	301	10	1580	81	292	12	1514	65	353	14	38.4	1.6	309	12	42.6	1.5	255.1	8.5	51.4	1.6	142.8	4.7	20.25	0.84	127.9	5.4	18.37	0.61	3.92	0.87	55.4	2	9.35	0.35	4.93	0.31	5.44	0.29	62	2.1
BTW02_48	436	13	608	25	208.7	9.5	0.52	0.05	994	40	1831	95	179.8	7.3	711	21	105.9	4.7	21.27	0.98	84.4	3.1	8.56	0.38	44	1.6	8	0.32	20.53	0.93	2.47	0.12	14.74	0.57	2.402	0.091	6.6	1.3	17.98	0.77	8.1	0.43	10.44	0.67	24.4	1.1	9.67	0.32
BTW02_49	293	13	390	19	367	15	0.381	0.051	322	13	1074	59	143.2	8.2	617	26	110.3	4.7	17.9	0.86	87.2	3.8	9.87	0.39	57.3	1.9	11.21	0.42	33.5	1.6	4.93	0.28	36.7	1.7	6.63	0.24	5.7	1.1	68.2	2.7	11.68	0.54	10.11	0.6	42.3	2.4	68.2	2.7
BTW02_50	304	11	504	20	554	23	15.26	0.55	259	10	786	44	111.2	4.9	591	24	142.1	5.5	31.6	1	146.3	4.6	18.94	0.73	111.7	4.8	20.16	0.78	50.8	1.8	5.84	0.17	31.2	1.2	3.89	0.14	1.83	0.71	2.37	0.12	1.54	0.11	1.94	0.12	4.1	0.2	1.064	0.032
BTW02_51	375	16	356	15	736	31	0.631	0.051	413	18	1449	57	216.2	9.6	1083	37	218.4	8	29.8	1	182.6	5.9	21.31	0.84	121.7	4.4	23.69	0.76	66.4	2.3	9.13	0.31	58.4	1.8	9.93	0.31	5.6	1.1	79.2	2.5	12.06	0.37	12.32	0.44	65.6	2.6	82.8	2.4
BTW02_52	367	12	463	11	526	13	0.583	0.075	408	11	1218	34	163.1	3.5	745	13	150.8	3.1	27.13	0.79	132.6	3.3	16.5	0.56	96.7	3.1	18	0.47	48.6	1.4	6.44	0.19	39.97	0.79	6.09	0.15	5.4	1.2	46.1	1	9.58	0.3	8.34	0.4	28	2.3	38.7	1.1
BTW02_53	330.7	7	1175	31	196.1	8.5	0.359	0.035	362	13	1090	29	145.8	5.3	647	19	117.9	3.3	25.03	0.71	91.1	3.3	9.96	0.32	51	1.5	7.96	0.25	16.41	0.57	1.754	0.084	9.11	0.26	1.271	0.054	5.7	1.3	15.52	0.43	6.89	0.32	6.81	0.43	17.4	1.4	9.86	0.31
BTW02_54	477	18	270	10	982	37	0.98	0.066	487	18	1796	90	272	13	1216	47	247.9	9.4	49.4	2	201.5	5.8	26.39	0.85	161.8	5.5	33.4	1.2	99.3	3.4	14.33	0.52	96.5	3.1	15.21	0.58	3.66	0.88	121.1	3.9	16.28	0.51	10.43	0.58	54.6	2.6	124.2	4
BTW02_55	906	37	491	16	933	33	0.186	0.036	245	11	1347	62	270	12	1577	61	375	15	24.6	1.1	302	13	35.6	1.5	189.1	7.2	34.5	1.3	88	4.1	9.34	0.43	47	1.9	5.84	0.24	2.18	0.69	8.25	0.35	3.11	0.39	3.07	0.32	7.69	0.48	8.14	0.29
BTW02_56	265	12	438	21	872	44	14.16	0.63	479	23	1311	76	184	10	890	46	210	11	31.4	1.3	215	10	27.3	1.1	160.9	6.3	31.4	1.2	75.4	2.7	9.33	0.37	51	2.6	6.49	0.25	0.93	0.43	2.26	0.15	1.26	0.12	1.56	0.17	4.2	0.25	1.459	0.057
BTW02_57	354	15	352	19	956	48	0.981	0.093	423	22	1327	76	178.9	9.9	866	46	209	11	44.4	3	200	11	23.8	1.3	148.1	7.3	29.6	1.4	90.6	4.8	13.51	0.87	97.3	5.4	17.33	0.78	5.8	1.1	25.8	1	8.48	0.49	9.64	0.63	31.7	1.5	18.91	0.92
BTW02_58	152.2	5.2	604	23	466	16	0.419	0.049	222	12	800	37	135.7	5.6	737	37	165.1	5.8	29.9	1.2	138.5	6	16.98	0.52	97.1	2.8	17.2	0.45	44	1.5	5.61	0.22	31.9	1.2	4.63	0.14	14.3	2.3	21.9	1.8	13.9	1.6	14.7	1.6	16.13	0.81	12.23	0.44
BTW02_59	554	26	420	21	326	16	2.47	0.15	784	36	2000	120	206	10	760	41	93.1	4.5	19.07	0.92	68.7	2.7	7.63	0.3	47.6	2.1	10.06	0.39	31.1	1.6	4.78	0.2	33.9	1.4	6.8	0.25	4.7	1	14.61	0.58	5.39	0.24	7.65	0.46	22	1.1	9.49	0.38
BTW02_60	173.2	8.1	306	14	107.4	4.1	0.56	0.055	425	18	1566	70	225.3	7.7	1163	45	211.6	7.6	31.6	1.2	130.2	4.9	10.24	0.45	36.7	1.3	4.35	0.18	6.61	0.28	0.481	0.033	1.71	0.12	0.176	0.012	2.97	0.84	11.59	0.41	3.8	0.13	3.16	0.19	0.424	0.037	14.77	0.61
BTW02_61	332	14	246.7	9.4	1398	64	1.5	0.71	362	18	1391	56	250	14	1320	48	323	13	46.7	1.4	293	11	39.6	1.6	239.3	7.8	45.6	1.7	132.5	4.6	18.29	0.66	114	4.1	16.5	0.65	6.1	1.3	35.2	1	9.7	0.33	9.66	0.43	24.49	0.83	29.02	0.95
BTW02_62	270.8	9.1	310	13	1610	120	1.08	0.12	644	36	2550	170	410	29	1920	130	391	26	72.3	4.5	315	19	41.8	2.7	261	15	53.2	3.6	160	10	25.9	1.7	180	12	28.9	1.9	4.5	1.1	81.4	4.1	12.33	0.51	16.32	0.96	103	8.4	87	5.3
BTW02_63	305	14	692	36	232	11	0.403	0.047	76.1	2.8	354	15	57.1	2.9	308	13	65.3	2.7	14.92	0.55	63.6	2	7.09	0.31	39	1.8	7.82	0.36	22.7	1	2.91	0.13	18.87	0.77	3.5	0.13	6.7	1.4	24.31	0.99	8	0.35	7.26	0.37	8.74	0.53	18.22	0.67
BTW02_64	218.3	8.7	293	10	1116	43	1.066	0.079	957	52	2850	130	435	25	1901	71	365	12	61.6	1.9	294.5	7.3	37.4	1.1	208.8	6.7	39.8	1.3	101.5	3.6	12.95	0.48	75.6	3	11.1	0.39	10.6	1.3	33.6	1.2	11.65	0.48	10.65	0.62	7.18	0.34	32.8	1.2
BTW02_65	154.7	7.3	273	11	574	24	17.77	0.85	412	18	1079	45	159.8	7.4	797	30	173.2	7.7	29.26	0.99	164.3	6.6	20.24	0.85	112.6	4.7	20.2	0.87	47.9	2	5.77	0.28	33.1	1.5	4.09	0.17	3.42	0.91	5.22	0.28	3.76	0.21	4.03	0.3	4.36	0.28	1.298	0.048
BTW02_66	209	10	177.5	8.4	3340	140	3.5	0.15	852	45	4430	240	908	51	4710	270	1029	55	67.6	3.1	856	34	113.2	5	657	27	125.9	6.3	335	15	44.8	1.7	279	10	40.4	1.6	4.6	1	50.7	2.2	9.72	0.45	7.71	0.72	24.1	1.2	51.3	2.1
BTW02_67	467	13	344.1	9.5	734	19	0.847	0.083	779	21	1872	50	205.2	8.6	811	26	139.4	4.2	41	1.3	125.8	3.8	15.35	0.46	95.6	3.4	20.8	0.43	68	2.1	10.98	0.33	81.1	2.1	16.16	0.47	6.5	1.3	126	2.7	21.21	0.94	18.8	1.1	82.4	3.8	109.7	3.1
BTW02_68	329.4	9.9	304	14	761	53	0.34	0.047	191	13	866	75	151	12	776	60	171	13	26.7	1.9	153	12	19.5	1.6	120.2	9.9	25.2	2.1	74.5	6	10.66	0.8	75.3	5.7	12.9	1.1	6.5	1.5	75.3	7.4	14	1.2	7.32	0.62	11.7	1.2	72.3	6.8
BTW02_69	692	26	353	12	2100	140	0.551	0.075	538	24	1550	83	242	12	1251	76	337	12	50.1	2.3	342	16	47.4	2.1	301	12	64.2	3.2	190.1	9.7	28.2	1.6	202.1	9.1	33.7	1.6	2.17	0.64	71.8	4.8	11.15	0.52	11.38	0.64	61.7	4	71.8	4.7
BTW02_70	395.8	9.1	381	9.1	654	18	0.95	0.14	266	7.3	980	20	148	5.2	752	20	154.3	4	37.5	1.1	137.9	4.2	16.91	0.4	101	1.7	20.99	0.55	63.5	1.8	9.2	0.38	65.2	2.2	11.98	0.28	3.94	0.9	86.2	2	12.15	0.3	8.54	0.33	40.4	1.1	86.8	1.6
BTW02_71	370	14	378	16	879	34	1.295	0.077	256.1	8.2	996	39	163.4	7.3	854	41	182.4	6.2	57.9	1.8	167.2	6.1	20.11	0.65	123.3	3.7	26.95	0.89	83.7	2.8	12.39	0.43	92.2	3.4	18.63	0.54	2.76	0.8	259.5	8.1	30.26	0.99	18.38	0.85	129.5	4.8	287.5	9.2
BTW02_72	688	30	422	19	1111	43	0.656	0.06	366	12	1305	45	226	12	1259	50	333	13	167.4	6	303	11	37.6	1.5	219.1	7.8	41	1.2	106.3	3.7	13.34	0.44	76.3	2.3	10.36	0.33	2.69	0.74	12.11	0.41	3.48	0.12	2.84	0.21	2.53	0.14	10.06	0.32
BTW02_73	549	16	231.3	5.6	860	25	0.995	0.078	483	12	1697	59	246.8	7.7	1164	35	223.9	6.6	57.5	1.8	183.2	4.6	23.12	0.76	138.8	4.6	28.32	0.82	79.7	2.7	11.32	0.36	74.8	2.6	12.29	0.39	3.48	0.86	113.8	2.8	15.42	0.4	12.1	0.52	66.9	3.1	113.4	3.6
BTW02_74	417.2	7.5	602	13	520	11	0.488	0.042	426	8.4	1181	22	151.8	2.5	693	14	134.2	2.8	44.3	1.1	117.9	2.5	13.88	0.27	80.3	1.7	16.49	0.38	48.1	1.4	6.73	0.18	46.2	1.4	8.37	0.22	17.3	1.6	36.3	1.6	19.8	1.4	20.6	1.4	20.04	0.64	25.23	0.67
BTW02_75	340.3	4.4	275.2	3.4	1473	18	1.73	0.22	556	8.6	1978	41	306.3	6.1	1568	28	346.3	5.4	78.8	1.7	319.1	5.4	41.48	0.61	251.6	4	49.88	0.71	140.1	2	19.32	0.31	125.6	1.7	20.08	0.23	3.85	0.79	111.5	3.4	15.89	0.53	15.04	0.48	80	1.8	101.2	2
BTW02_76	403	15	790	29	119.6	5.4	0.754	0.044	141.7	7.1	514	25	69.4	3	315	14	50.3	2.1	10.86	0.46	40.9	1.3	3.98	0.15	21.52	0.75	3.96	0.14	10.35	0.36	1.281	0.061	8.07	0.4	1.409	0.058	3.5	1	11.87	0.34	4.27	0.13	5.14	0.28	13	0.53	8.43	0.23
BTW02_77	247.5	9.3	434	19	841	34	0.093	0.018	67.6	3.1	508	27	118.1	6	712	36	200.7	9.3	22.68	0.96	179.6	6.7	23.11	0.93	136.2	5.2	27.5	1	77.4	3	10.65	0.46	66.1	2.6	9.63	0.37	4.27	0.96	19.42	0.84	5.65	0.32	4.2	0.35	2.22	0.12	17.62	0.54
BTW02_78	451	16	249	12	2284	94	3.37	0.15	2610	110	6810	280	876	38	3620	130	637	23	81.9	4.2	525	15	65.9	2.3	383	13	76.3	2.8	222.3	8.2	30.4	1	199.5	7.4	32.3	1	4.73	0.96	279.3	9.2	35	1.2	52.8	2	368	18	282	12
BTW02_79	367	12	263.3	7.7	1748	77	0.855	0.077	180.2	7.7	1067	57	227	11	1364	55	368	15	62.6	2.1	344	10	45.5	1.3	277.7	8.1	58.3	2	170.8	6.3	24.21	0.84	158.6	5.2	25.88	0.8	9.3	1.4	80.3	2.2	15.86	0.5	10.3	0.47	10.3	0.5	74.7	2.4
BTW02_80	450	21	770	39	314	15	3.32	0.28	319	23	1087	69	159.4	9.3	794	38	160.8	7.9	25	1	121.8	4.8	13.11	0.51	67.9	2.7	11.87	0.44	27.6	1	3.08	0.11	16.63	0.8	2.33	0.1	1.87	0.64	8.52	0.37	2.8	0.22	3.98	0.28	14.24	0.71	6.55	0.25
BTW02_81	200.6	8	243	11	1443	53	0.57	0.057	1000	45	3100	180	456	19	2098	92	420	19	46.9	1.8	355	14	45.5	2	271	10	51.9	1.8	138	6	18.58	0.81	112.4	4.3	15.09	0.65	3.34	0.86	38.7	1.4	7.66	0.37	5.62	0.36	11.09	0.53	37.7	1.4
BTW02_82	386	16	249	12	1592	73	0.664	0.06	134.2	6.5	855	42	182.1	6.6	1084	54	312	12	73.5	3.5	311	14	42.2	1.7	261	12	52.8	2.4	155.5	7.7	22.73	0.95	144	5.6	23.51	0.89	3.43	0.67	105.1	4.3	14.47	0.63	6.75	0.5	25.5	1.2	110.3	4.3
BTW02_83	230.9	8.8	424	14	349	15	0.259	0.037	70.1	3.1	272	12	48	2.6	282	15	74.4	2.9	16.29	0.77	77	3.7	9.77	0.44	57	2.6	11.93	0.51	35.3	1.6	4.98	0.22	32.3	1.5	5.91	0.25	17	3.1	81.3	5.6	24.4	3	20.9	3.1	18.5	1.2	60.1	3
BTW02_84	225.8	9.2	343	11	1027	40	0.304	0.033	139.5	8.3	856	58	181	10	1038	55	235	12	32	1.5	204.2	8.3	28.3	1	169	7.3	35.4	1.2	100.7	4.2	14.48	0.53	88.3	3.9	12.78	0.48	7.4	1.1	52.3	2	11.5	0.43	9.25	0.47	16.2	1	54.9	2.4
BTW02_85	1121	45	816	38	704	29	0.691	0.071	398	17	1310	77	178.2	7.6	909	40	217	11	37.3	1.4	188.3	6.3	25.2	1.1	144.6	6.6	26	1	64.1	2.4	7.81	0.41	42.3	1.7	5	0.23	5.7	1.1	8.13	0.31	6.11	0.27	6.59	0.41	11.38	0.64	10.24	0.32
BTW02_86	353	12	183.8	8.4	2320	130	0.546	0.078	663	34	3080	170	556	32	2970	140	627	30	78.1	4.5	522	25	68.1	3.9	394	20	77.7	3.3	213	10	30.4	1.7	186	11	29.2	1.5	8.9	1.9	52.8	2.5	15.43	0.47	16.2	0.89	39.1	2.6	43.3	3.2
BTW02_87	210.6	6.7	246.3	7	1234	44	0.78	0.23	618	26	1968	82	307	14	1559	66	325	13	39.8	1.6	295.1	8	37.8	1.1	218.5	6.2	42.4	1.1	116.7	3.6	15.25	0.51	93.2	3.6	12.81	0.33	1.93	0.64	13.83	0.34	2.847	0.087	2.13	0.14	6.43	0.86	13.27	0.4
BTW02_88	210.7	9	679	41	1341	58	0.611	0.072	260	11	1137	58	201.1	9	1188	63	318	12	45.9	1.9	332	12	43.8	1.8	262	11	49.5	2.1	133.2	4.6	16.87	0.67	103.3	4.3	14.83	0.63	9.9	1.7	38.6	1.6	11.84	0.63	12.14	0.71	30.1	1.4	30.8	1.2
BTW02_89	435	18	395	15	757	36	1.009	0.082	613	30	1802	90	249	13	1127	40	234.6	9.9	23.62	0.87	204.3	6.7	23.8	0.7	135.8	3.8	25.8	0.88	70.7	2.5	9.05	0.38	57.3	2.1	9.47	0.37	2.51	0.75	62.6	2.1	8.85	0.27	7.84	0.46	40.6	1.6	66.1	2.3
BTW02_90	270	12	427	17	878	44	10.53	0.5	495	20	1289	60	188.2	8.3	861	42	198.1	9.7	27	1.5	199.2	7.6	27.7	1.3	165.4	6.4	30.2	1	80.8	3.4	9.89	0.52	54.1	2.8	6.86	0.32	0.9	0.41	1.377	0.069	0.914	0.056	1.011	0.098	1.7	0.11	0.699	0.029
BTW02_91	480.2	6.2	768	16	1303	21	0.88	0.12	699	10	2506	44	401.3	6.9	2039	37	459.4	9.6	64.2	1.4	386.2	8.2	47.43	0.85	264.7	4.4	46.17	0.84	118.4	1.7	14.91	0.29	86.1	1.8	11.67	0.25	22	3.8	53.2	1.1	24.9	0.65	25.09	0.8	34.9	1.8	32.06	0.78
BTW02_92	171.4	8.7	1693	70	174.1	7.8	2.1	0.15	1079	45	2100	100	228	8.4	960	45	142.1	7.2	18.26	0.89	97.6	4.1	9.05	0.33	40.3	1.8	6.61	0.25	14.07	0.64	1.526	0.082	8.03	0.4	1.194	0.058	4.8	1.3	8.05	0.69	5.21	0.54	5.92	0.54	39.4	2.1	12.02	0.58
BTW02_93	197	2.5	246.3	3.8	1991	39	1.328	0.085	441.1	7.2	1994	27	364.4	7.5	2032	28	503.7	9.2	70.6	1.5	466.2	7.6	60.6	1.1	362.9	4.8	70.1	1.1	191	3.2	25	0.49	151.5	2.8	21.54	0.36	1.98	0.52	54.7	1	7.47	0.25	4.13	0.26	18.42	0.38	56.82	0.92
BTW02_94	188.7	5.3	462	17	885	42	14.23	0.64	489	25	1291	62	186.9	9.3	881	45	202	8.1	39.1	1.4	202	8.5	27.2	1.1	166.5	8.4	31	1.7	79.5	3.9	9.67	0.45	50.8	2.1	6.31	0.27	1.72	0.59	2.62	0.27	1.86	0.21	2	0.25	3.82	0.28	0.984	0.06
BTW02_95	392.5	5	427.5	5.8	506.7	9.2	0.291	0.041	289.1	4.8	1117	17	174.6	3.2	868	16	177.7	3.4	33.49	0.68	139.3	3	16.94	0.39	95.9	1.9	17.62	0.39	45.65	0.77	6.15	0.13	38.02	0.77	5.6	0.12	3.46	0.96	10.4	0.22	5.69	0.21	5.43	0.26	3.93	0.28	5.421	0.085
BTW02_96	588	22	436	15	233.3	8.5	0.673	0.053	1204	49	2076	82	195	9.8	718	31	100.1	3.5	45.5	1.9	78.2	2.6	7.67	0.22	40.9	1.3	8.19	0.31	20.58	0.69	2.62	0.12	17.32	0.61	3.1	0.11	2.49	0.84	24.09	0.58	4.99	0.19	7.09	0.31	32.1	1.1	20.21	0.65
BTW02_97	290.5	4.1	290.1	3.9	40.4	1.1	0.79	0.15	33	1.4	104.2	3.5	12.47	0.44	57.3	1.5	13.27	0.48	5.41	0.19	12.05	0.4	1.524	0.063	8.02	0.3	1.541	0.055	4.2	0.16	0.541	0.032	3.77	0.16	0.685	0.031	60.4	7.1	81.2	5.8	68.5	5.3	70.2	5.6	1.57	0.18	3.01	0.1
BTW02_98	303	14	255	12	825	29	0.352	0.039	337	13	1389	76	203.2	8.9	1019	37	210.4	8.5	24.2	0.92	184.6	7.7	22.72	0.92	137.7	6	27.2	1.1	78.5	2.9	11.14	0.48	74.1	2.9	12.08	0.49	5.6	1	56.5	2.4	12.28	0.61	10.37	0.7	30	1.6	51.7	2.1
BTW02_99	440.4	4.7	506.7	5.9	244.5	7.3	0.71	0.077	380	16	1084	40	131.7	4.5	567	21	88.7	2.4	23.99	0.69	68.2	1.7	7.3	0.19	39.5	1.2	7.87	0.23	21.79	0.74	2.754	0.097	18.74	0.74	3.43	0.11	5.2	1	12.45	0.54	5.16	0.32	5.63	0.39	11.93	0.38	8.29	0.24
BTW02_100	234.2	2.7	273	3.6	1267	59	1.08	0.25	77.5	7.1	498	41	107.5	7.6	734	44	244	13	23.2	1.4	257	12	35.5	1.8	216.7	9.9	42.7	2	119.1	5.9	15.53	0.77	95.2	5	15.1	0.89	9	1.8	37	3.9	11	0.87	13.4	1.3	36.4	5.9	27.5	3.5
BTW02_101	258	11	236	11	1216	47	0.128	0.026	228	11	1263	70	222.2	7.4	1170	53	275	12	35.5	1.8	235.1	9.7	31.4	1.4	190	7	39.4	1.6	115.1	5.1	17.26	0.71	114.2	4.9	18.61	0.66	7.3	1.3	26.2	1.2	10.59	0.66	10.5	0.52	20.4	1.9	17.95	0.7
BTW02_102	513	16	443	22	192.5	8.6	0.184	0.03	65.8	2.5	221.4	7.8	33.5	1.5	172.5	7.4	41.5	1.9	12.18	0.49	46.1	1.5	5.5	0.26	32.7	1.3	6.67	0.26	17.9	0.76	2.364	0.093	15.33	0.63	2.52	0.1	3.31	0.96	16.03	0.56	4.4	0.18	3.5	0.32	2.49	0.28	22.28	0.73
BTW02_103	253.9	9.2	178.1	7.5	2430	110	0.542	0.053	587	26	2720	110	522	24	2800	100	611	26	55	2	549	22	74.3	2.8	431	17	82.6	3.4	224.3	7.9	29.8	1.2	178.1	7.1	23.72	0.8	2.73	0.89	27.95	0.88	5.34	0.22	5.31	0.31	32.2	1.7	28.5	1.1
BTW02_104	313.3	9.3	288	14	974	36	0.675	0.066	661	40	2110	120	290	15	1300	87	259.5	9.8	56.6	3.6	226	12	28.13	0.96	163.2	9	32.9	1.9	93.1	4.7	13.39	0.73	91.1	5.6	15.97	0.82	5.6	1.2	101.4	5.4	15.9	0.86	17.16	0.98	81.7	5.7	89.9	4.7
BTW02_105	225.2	9.1	660	26	312.7	9.3	0.162	0.032	573	19	1477	63	182.6	7.1	836	33	170.2	5.5	24.13	0.74	138.1	5.3	15.79	0.69	78.5	3	12.82	0.46	27.22	0.78	2.922	0.089	15.83	0.49	2.244	0.067	2.6	0.73	26.05	0.85	5.73	0.23	5.41	0.36	28	1.1	21.93	0.52
BTW02_106	313	10	335	14	703	35	0.113	0.03	83	3.7	319	13	57.1	2.2	359	12	117	5.8	23.24	0.78	119.8	3.5	16.93	0.54	105.2	3.3	22.26	0.87	63.8	2.2	9.09	0.35	60	2.5	10.13	0.21	4.6	1	19.27	0.67	5.67	0.24	5.2	0.29	6.94	0.27	15.32	0.44
BTW02_107	243.2	4.3	671.9	8.4	289.2	5.3	0.207	0.033	468.5	7.8	1610	24	221.9	3.6	1000	16	161.8	3.3	24.18	0.71	112.3	2.3	10.8	0.2	51.2	0.9	8.91	0.19	21.02	0.42	2.532	0.081	14.38	0.29	1.962	0.039	5.26	0.98	16.44	0.59	7.36	0.58	7.03	0.64	7.31	0.27	9.21	0.15
BTW02_108	503	20	208.4	8.6	3270	110	2.94	0.24	1124	45	4860	260	797	34	3750	130	767	30	104.9	4	612	21	83.6	2.6	527	15	106	3.6	319	10	50.3	1.6	343	11	51.8	1.5	5.2	1	445	11	52.1	1.4	60.2	3.1	444	16	499	13
BTW02_109	165.2	5.7	638	28	384	13	0.222	0.029	194.6	7.2	748	35	129	5.8	692	31	146.2	5.5	24.78	0.78	124.6	4.1	14.7	0.55	81.5	3.5	14.56	0.48	36.7	1.3	4.45	0.21	25.26	0.93	3.39	0.13	8.8	1.4	12.77	0.37	8.95	0.27	8.9	0.35	3.06	0.2	4.5	0.14
BTW02_110	438	16	1102	45	310	12	3.22	0.21	158.2	6.2	649	31	107.3	4.3	560	18	127.2	4.5	15.54	0.58	102.8	4.2	11.59	0.52	62.5	2.1	11.34	0.4	27.8	1.1	3.61	0.15	20	0.81	2.84	0.12	5.9	1	36.1	1.3	8.81	0.39	10.12	0.44	37.7	1.8	32	1.1
Sample 2		Location: Bunatrahir West			Grid Coordinates: 54°18'31.6''N, -9°23'35.6''W
	Mn55	2σ	Sr88	2σ	Y89	2σ	Zr90	2σ	La139	2σ	Ce140	2σ	Pr141	2σ	Nd146	2σ	Sm147	2σ	Eu153	2σ	Gd157	2σ	Tb159	2σ	Dy163	2σ	Ho165	2σ	Er166	2σ	Tm169	2σ	Yb172	2σ	Lu175	2σ	Pb204	2σ	Pb206	2σ	Pb207	2σ	Pb208	2σ	Th232	2σ	U238	2σ
BTW05_0	250	11	550	36	176	11	0.165	0.035	6.98	0.42	28.5	1.6	5.9	0.29	40.5	2.6	18.5	1.1	5.09	0.26	29.3	1.5	4.51	0.19	29.3	1.2	6.4	0.28	17.4	0.72	2.18	0.12	13.96	0.78	2.11	0.11	1.23	0.56	1.705	0.072	1.411	0.065	1.32	0.11	1.06	0.34	0.423	0.033
BTW05_1	610	26	92.5	4.4	2460	110	0.143	0.044	56.4	2.4	227	11	41.4	1.8	268	12	134.6	6.6	11.92	0.63	252	10	47.4	1.8	364	13	80.9	2.9	247	10	33.8	1.4	214	10	32.6	1.2	2.91	0.75	6.94	0.27	3.63	0.15	3.59	0.21	3.01	0.29	14.85	0.9
BTW05_2	1780	73	301	17	964	44	0.12	0.062	64.8	3.1	248	14	44.6	1.7	251	11	109.9	4.7	18.9	0.91	153.4	4.6	29.1	1.1	199.6	7.9	37	1.6	98.4	4.2	11.9	0.5	70.8	2.2	8.52	0.37	12.2	1.5	15.45	0.61	11.52	0.44	11.14	0.69	5.56	0.43	13.83	0.52
BTW05_3	139.4	5.3	344	14	922	28	0.394	0.056	215.2	9.8	967	42	174.3	7.6	961	31	255.3	9	41	1.1	225	7.2	29.78	0.89	181.6	5.8	34.73	0.89	93.2	2.7	12.73	0.42	84.3	2.7	11.89	0.32	1.54	0.57	16.73	0.38	2.653	0.066	1.31	0.11	6.1	0.35	17.52	0.43
BTW05_4	429	15	496	20	217	8.2	0.272	0.03	348	13	986	46	120.8	5.1	536	27	88.2	3.6	16.43	0.7	66.8	2.5	7.18	0.27	38.7	1.6	7.49	0.31	20.53	0.83	2.96	0.17	18.59	0.9	3.19	0.14	1.98	0.75	32.1	1.4	5.29	0.21	3.97	0.2	16.22	0.74	36.3	1.3
BTW05_5	376	19	380	20	123.7	6.9	0.996	0.068	4.55	0.37	18.9	1.4	3.74	0.27	23.9	2	9.2	0.63	3.09	0.25	13.16	0.9	2.19	0.12	15.59	0.64	3.99	0.2	14.02	0.69	2.42	0.12	19.47	0.97	3.77	0.18	3.02	0.8	6.36	0.23	2.99	0.12	2.87	0.22	5.74	0.71	14.5	0.65
BTW05_6	4010	160	326.3	6.5	1613	45	2.69	0.98	129.3	3.2	511	12	83	1.5	466.2	7.6	189.2	3.5	28.2	1	250.4	4.3	48.54	0.9	340.5	6.8	64.8	1.5	177.7	5.6	24.6	0.9	152.2	5.2	20.23	0.68	9.5	1.9	16.48	0.74	10.28	0.41	10.54	0.5	20	5.9	24.7	0.77
BTW05_7	515.3	7.6	445	11	403.5	8.6	2.02	0.48	58.75	0.79	546	11	121.9	2.7	728	14	169.5	2.8	28.13	0.51	123.4	2.4	14.09	0.25	76.5	1.2	13.63	0.27	35.5	0.8	4.72	0.16	28.97	0.85	4.257	0.099	4	1.3	10.4	1.5	5.5	1.2	5.3	1.2	5.88	0.35	7.57	0.23
BTW05_8	217.3	5.2	261.1	6	239.3	6.6	0.191	0.035	47.5	1.5	157.8	5.2	26.7	1.1	150.2	6.1	48.8	2.4	18.34	0.81	58.9	3.4	7.34	0.42	42.5	1.9	8.13	0.29	21.94	0.68	2.803	0.086	17.91	0.53	3.38	0.12	2.64	0.79	11.48	0.44	3.18	0.14	3.09	0.18	20.6	2.9	9.1	0.28
BTW05_9	460.9	5	293.5	4.9	111.4	1.6	0.51	0.16	22.89	0.77	108.4	3.1	21.36	0.59	135.3	4.1	35.4	1.5	10.47	0.38	34.4	1.8	4.17	0.22	22.7	1	3.97	0.12	10.32	0.22	1.2	0.054	7.08	0.27	1.207	0.061	2.32	0.77	20.39	0.52	4.15	0.11	2.41	0.11	10.1	1.6	16.75	0.28
BTW05_10	404	14	527	18	114.1	4.4	0.841	0.073	2000	100	2490	140	160.6	6.6	490	19	58.2	2.4	14.36	0.58	42.3	1.9	4.21	0.18	22	1.1	4.08	0.16	10.13	0.38	1.364	0.08	9.26	0.4	1.684	0.077	6.4	1.3	11.94	0.52	6.63	0.26	8.84	0.44	67.1	2.5	22.2	1.1
BTW05_11	491	20	592	24	361	13	0.027	0.012	35.8	1.5	187.7	7.4	42.2	1.8	274	13	84	3.9	16.86	0.66	84.5	2.5	11.18	0.41	68.1	2.6	13.24	0.5	35.3	1.6	4.33	0.15	23.67	0.93	3.042	0.09	1.08	0.51	3.1	0.11	1.333	0.046	1.19	0.084	0.703	0.07	3.21	0.1
BTW05_12	549	21	326	13	201.4	9.3	-1.8e-06	6.2e-08	40.4	1.5	143.8	6.2	26.7	1.1	155.3	5.2	55.5	2	8.28	0.31	57.4	2.1	7.31	0.24	39.8	1.4	7.61	0.29	18.88	0.78	2.17	0.1	11.3	0.38	1.647	0.063	2.24	0.79	4.01	0.14	2.452	0.08	2.16	0.15	0.578	0.053	2.002	0.06
BTW05_13	219.5	5.4	493	21	100.1	3.9	0.086	0.022	26.4	1.2	137.8	6.9	27.4	1.4	177.7	8	60.6	3.1	17.3	0.79	60.1	2	6.58	0.2	30.2	0.92	4.28	0.17	7.64	0.31	0.652	0.038	2.74	0.15	0.399	0.018	1.56	0.6	1.757	0.069	1.439	0.06	1.83	0.13	19.8	1.1	0.547	0.024
BTW05_14	177.1	5.9	136.1	4.9	2641	89	2.12	0.13	827	31	3470	110	599	24	3290	130	825	28	86.6	2.6	748	25	94.5	3.4	550	18	100	3.9	251.7	7.1	30.9	1.3	173.1	5.3	23.22	0.79	1.98	0.68	32.9	1.3	5.9	0.23	6.61	0.39	34.2	1.7	33.5	1.1
BTW05_15	450.7	5.7	378.8	5.4	708	22	0.095	0.028	15.09	0.39	54.8	1	9.94	0.27	65.4	1.5	25.75	0.87	3.81	0.13	47.3	1.4	9.28	0.28	83.1	2.5	23.14	0.63	90.1	2.5	16.54	0.53	135	3.8	22.09	0.64	11.3	1.7	11.27	0.23	9.86	0.21	9.9	0.29	1.105	0.098	3.74	0.17
BTW05_16	888	36	318	14	849	24	-1.804e-06	6.1e-08	51.6	2.5	214.5	9.4	36.5	1.3	234	10	106	4.2	12.68	0.4	175.9	5.5	32.1	1	204	6.9	33.9	1	80.3	2.5	9.71	0.34	54.1	2.1	7.25	0.27	5.77	0.98	9.28	0.35	6.4	0.27	6.58	0.3	0.536	0.048	10.8	0.33
BTW05_17	219	11	631	30	60.9	2.9	0.049	0.018	6.53	0.45	28.7	1.9	5.95	0.51	39.4	3	12.93	0.96	3.66	0.33	15.7	1.1	1.89	0.13	11.02	0.55	2.22	0.11	5.87	0.27	0.685	0.043	4.3	0.18	0.713	0.03	2.82	0.67	2.315	0.084	2.342	0.081	2.3	0.12	1.9	0.45	0.348	0.013
BTW05_18	1025	33	228.8	8.5	616	28	0.096	0.019	89	4	225	13	32.7	2.1	175	13	59.4	4.1	17.6	1.1	77.5	4.4	12.7	0.67	94	4	20.6	1	61.2	2.5	8.92	0.46	56	2.4	7.64	0.33	2.44	0.76	4.05	0.14	2.43	0.12	2.76	0.22	15.7	1.7	6.83	0.26
BTW05_19	247	11	236	11	976	39	0.19	0.026	944	46	2700	140	375	14	1683	83	305	11	18.49	0.77	240	10	31	1.2	179.4	8.5	33.5	1.5	91.7	3.3	11.42	0.49	66	3	8.94	0.4	2.03	0.79	31.6	1.4	5.82	0.24	6.41	0.29	29.3	1.2	26.9	1.1
BTW05_20	268.9	8.5	176	6.6	40.8	2.3	0.0243	0.0093	0.43	0.074	1.72	0.3	0.372	0.049	2.91	0.3	1.44	0.17	0.371	0.033	3.31	0.17	0.676	0.038	5.61	0.26	1.429	0.082	4.58	0.2	0.667	0.042	4.49	0.3	0.833	0.049	0.64	0.35	1.564	0.075	0.939	0.046	0.807	0.085	0.517	0.074	0.764	0.054
BTW05_21	336	16	382	18	1028	40	69	11	115	10	319	25	50.9	3.4	283	19	78.2	4	9.62	0.49	101.5	5.2	17.01	0.72	136.1	5.5	33.3	1.5	108.3	4.3	15.9	0.6	96	3.3	13.09	0.47	4.05	0.93	7.99	0.43	5.38	0.28	5.83	0.42	13.9	1.1	9.71	0.76
BTW05_22	254.3	4.2	768	11	112.2	7.9	0.228	0.073	30.6	3.1	134	12	25.7	2.4	159	15	44.2	4.9	9.01	0.65	40.3	3.5	4.64	0.41	23.9	1.9	4.07	0.39	9.55	0.62	1.13	0.11	5.92	0.45	0.917	0.077	3.7	1.9	9.92	0.55	4.14	0.22	3.86	0.36	10.79	0.69	7.41	0.57
BTW05_23	214.7	5.3	1500	35	52.3	1.5	0.357	0.055	79.2	4.3	178.5	6.9	21.4	1.1	102.9	3.7	19.88	0.76	5.45	0.18	16.53	0.57	1.872	0.065	9.87	0.34	1.934	0.083	4.92	0.21	0.598	0.033	3.76	0.21	0.604	0.024	4	1.3	5.52	0.17	4.48	0.19	4.71	0.38	3.14	0.17	1.438	0.037
BTW05_24	203.3	7.9	253	13	84.1	4	340	120	0.325	0.055	1.43	0.19	0.325	0.043	2.37	0.24	1.66	0.17	0.669	0.061	4.55	0.3	1.097	0.063	10.14	0.45	2.73	0.13	9.31	0.48	1.362	0.081	9.12	0.67	1.39	0.16	0.58	0.34	0.611	0.038	0.536	0.029	0.506	0.057	0.11	0.073	0.158	0.054
BTW05_25	465	16	219.4	7.5	2700	100	0.136	0.036	18.51	0.71	80.2	4.2	17.64	0.88	153.7	7.5	111.8	4.8	16	0.74	265.7	9.9	57.2	2.4	462	18	101	3.5	298	10	40.3	1.4	233.6	8.8	29.7	1.1	2.78	0.76	7.61	0.33	3.23	0.13	3.26	0.27	4.79	0.33	18.35	0.76
BTW05_26	265	20	427	22	142.3	9.5	2.11	0.21	31	2.7	129	12	24.1	1.8	133	10	42.2	3.4	13	1.1	47	3.4	6.05	0.45	31.7	2	5.74	0.38	13.54	0.7	1.7	0.12	9.46	0.66	1.72	0.12	3.28	0.85	3.08	0.21	2.76	0.19	3.52	0.26	27.1	3.1	0.766	0.049
BTW05_27	297	15	596	32	701	41	14.06	0.57	378	19	981	60	146.1	9.5	762	41	182.1	9	39.1	1.5	177.3	7.1	23	1	133.3	5.5	25.4	1.3	62.4	2.7	7.17	0.4	40.4	2.1	5.27	0.23	1.32	0.65	2.303	0.099	1.478	0.069	1.82	0.13	7.6	1.2	1.348	0.073
BTW05_28	594	19	236.5	7.6	1995	68	0.156	0.024	24.08	0.98	93.4	3.6	18.23	0.6	120.3	4.6	61.7	2.2	11.39	0.52	120.2	4	26.79	0.98	243.2	8.3	66.5	2.8	237.8	8.2	38.4	1.1	258.6	9	38.6	1.3	2.26	0.71	6.9	0.27	2.84	0.11	2.93	0.16	7.1	1.2	18.17	0.51
BTW05_29	445	16	178.5	7.5	638	32	0.076	0.021	8.04	0.39	32.9	1.8	7.83	0.57	70	4.4	49.1	3.2	11.41	0.56	95	4.9	15.8	1	108	6.1	22.1	1.2	63.6	3.4	8.27	0.41	49	1.8	6.7	0.33	1.58	0.58	20.88	0.92	3.08	0.11	1.86	0.18	4.55	0.31	31.5	1.6
BTW05_30	335	12	179.1	7.6	1950	140	0.265	0.033	236	13	1255	78	226	16	1298	69	341	18	28.3	1.5	338	16	49.2	2.3	315	14	60.8	3	176.6	7	25.7	1	155.5	8	23.53	0.99	2.97	0.85	43.2	1.4	7.23	0.23	14.44	0.86	73.4	5.4	41	1.4
BTW05_31	418	14	790	25	97.5	2.7	92	51	3	0.18	22.71	0.97	6.1	0.28	44.4	1.5	15.24	0.63	4.01	0.15	18.65	0.71	2.577	0.077	15.98	0.6	3.41	0.11	9.88	0.38	1.339	0.06	7.95	0.29	1.282	0.043	0.61	0.36	6.14	0.23	1.142	0.043	0.794	0.064	0.227	0.028	7.83	0.24
BTW05_32	322	11	179.6	7.1	502	22	0.014	0.0073	2.08	0.15	7.99	0.34	1.756	0.099	14.73	0.74	14.84	0.71	8.35	0.52	56.2	2.3	11.9	0.48	90	3.6	19.69	0.69	52.2	2	5.94	0.22	34.4	1.3	5.26	0.19	7.2	1.3	9.45	0.28	6.8	0.23	6.81	0.34	0.046	0.017	9.03	0.34
BTW05_33	124	3.7	653	27	582	19	1.94	0.13	69.4	2.4	287	13	47.6	2	270.8	9.1	63.3	2.3	14.37	0.44	60.5	2.1	9.06	0.31	67	2.5	17.96	0.59	71.6	2.8	13.75	0.52	97.6	3.6	14.36	0.5	8.7	1.7	11.75	0.28	8.47	0.19	9.59	0.39	29.9	1.3	11.08	0.29
BTW05_34	359.6	4.5	231.6	3.4	1749	28	0.96	0.22	372.6	8	1366	22	226.9	3.8	1287	21	350.4	6.6	87.7	1.6	353.7	6.4	47.32	0.95	288.9	5.7	58.8	1	168.4	2.8	22.78	0.35	149.5	2.4	25.54	0.48	3.5	1	97.6	1.9	13.42	0.3	7.87	0.23	45.3	1	96.4	1.6
BTW05_35	41.7	1.7	148.4	5.4	187.5	6.4	0.102	0.028	36.3	2.1	129.6	7.3	25.1	1.7	165	10	65.4	2.7	14.02	0.73	114.3	4.7	16.76	0.77	78.3	3.1	6.46	0.32	6.82	0.37	0.437	0.03	1.63	0.15	0.143	0.012	4.95	0.94	12.9	0.38	4.97	0.18	4.99	0.3	19.2	3.3	12.82	0.41
BTW05_36	437	17	248	8	613	19	2.8	3.7	6.17	0.31	27.5	1.1	5.28	0.26	37.9	1.5	21.97	0.76	3.58	0.13	47.7	1.7	10.42	0.33	91.1	2.9	21.9	0.62	66.5	1.9	9.92	0.31	62.7	1.6	9	0.28	5.5	1.3	8.09	0.23	6.65	0.16	6.63	0.35	1.19	0.18	5.02	0.17
BTW05_37	219.9	8.9	484	19	142.6	8.8	0.314	0.08	4.2	0.25	24.7	1.5	6.46	0.36	57.7	3.2	30.2	1.4	8.5	0.41	40.4	2	5.44	0.29	28.8	1.4	5.1	0.3	13.09	0.81	1.47	0.12	7.85	0.6	1.185	0.087	1.9	0.68	4.95	0.37	2.49	0.12	2.23	0.18	4.4	0.74	3.05	0.28
BTW05_38	411	14	702	37	221	10	0.747	0.097	922	57	1737	99	163.6	8.8	679	28	99.4	5.2	20.3	1.1	76.3	3.9	7.94	0.4	44	2.2	8.28	0.32	22.1	1.2	2.79	0.15	17.14	0.8	2.79	0.16	2.45	0.69	15.73	0.66	3.83	0.16	5.53	0.35	23.4	1.1	12.48	0.53
BTW05_39	369	13	352	15	18.7	1.2	0.109	0.026	8.09	0.77	32.1	2.8	6.03	0.44	39.4	2.5	10.69	0.7	6.13	0.29	9.79	0.51	0.888	0.062	4.03	0.22	0.701	0.041	1.74	0.12	0.23	0.021	1.49	0.11	0.28	0.015	1.18	0.42	6.84	0.25	1.579	0.067	1.159	0.093	2.38	0.17	5.86	0.24
BTW05_40	410.3	8.7	319	5.7	227.3	5.6	0.113	0.031	3.66	0.19	32.37	0.91	12.03	0.28	123.9	3.2	70.6	2.2	20.76	0.41	72.4	1.6	8.31	0.2	44.4	1.1	7.97	0.17	21.72	0.41	2.702	0.085	17.21	0.46	2.706	0.064	0.9	0.41	28.64	0.61	3.904	0.092	1.019	0.089	1.05	0.13	28.87	0.56
BTW05_41	197.8	9	1088	35	253	12	1.58	0.18	344	28	908	58	117.2	6	547	19	114	4.7	28	1.1	89.1	3.6	10.59	0.46	55.6	2.7	9.51	0.38	24.1	1.2	2.96	0.16	17.6	1	2.39	0.12	2.37	0.69	6.62	0.18	2.87	0.11	4.01	0.24	40.2	2.1	17.07	0.53
BTW05_42	1020	44	761	39	727	43	0.657	0.081	481	25	2240	130	373	18	1817	94	329	16	62.9	2.3	233	10	27.4	1.2	149.6	6.4	26	1.1	65.9	2.9	8.25	0.3	52.5	2.3	7.35	0.29	1.9	0.64	12.38	0.53	2.9	0.13	3.42	0.23	42.6	2.7	12.22	0.43
BTW05_43	164.1	5.5	328	16	304	14	0.567	0.066	55.3	2.3	250	11	46.9	2.3	280	14	88.8	3.3	13.9	0.53	94.3	3.5	11.91	0.37	67.3	2.2	11.56	0.38	27.89	0.93	2.94	0.12	15.39	0.62	2.27	0.11	0.58	0.35	16.95	0.78	3.07	0.13	2.27	0.17	33.2	1.7	14.93	0.59
BTW05_44	375	11	354	16	1151	35	0.063	0.029	16.19	0.85	75.1	3.2	14.9	1	101.6	5.6	51.9	2	11.79	0.63	117.7	3.3	24.54	0.54	197.4	5.3	41.98	0.96	104.6	2.8	11.63	0.37	57.3	1.6	6.76	0.15	10.3	1.5	11.03	0.37	8.4	0.31	8.45	0.45	5	0.58	8.38	0.31
BTW05_45	301	13	282	12	1665	60	0.56	0.22	22	1	116.7	5.2	25.2	1	213.4	8.2	124	4	57.4	2.2	205.5	7.1	37.52	0.96	279	13	62.8	2.5	188.5	7.7	26.61	0.92	158.4	5.8	21.61	0.76	1.73	0.61	17.16	0.58	2.74	0.27	1.5	0.24	1.54	0.14	26.17	0.94
BTW05_46	460	20	1990	83	182	7.9	6.5	0.34	451	23	1239	55	146.5	7.1	643	25	111.4	4.2	25.4	1	82.5	3.4	8.78	0.34	45.5	1.8	7.44	0.23	17.38	0.69	1.803	0.086	9.75	0.53	1.22	0.065	0.98	0.4	2.59	0.13	1.432	0.066	1.98	0.15	17.8	1.1	5.24	0.19
BTW05_47	169.4	7.6	294	14	780	31	0.0117	0.0065	18	1.4	75.5	5.2	14.59	0.95	99.5	4.4	55.8	2.6	11.13	0.56	133.2	5.8	25.4	1.1	177.3	8	29.5	1.1	54.4	2.2	4.45	0.19	16.01	0.64	1.668	0.083	8	1.4	11.55	0.44	7.44	0.28	7.78	0.45	2.87	0.35	15.23	0.46
BTW05_48	521.1	5.4	475.3	5	238	3.9	0.358	0.058	28.3	1	154	3.4	35.05	0.69	247.5	4.8	72.3	1.4	13.49	0.28	72.4	1.3	8.58	0.17	47.6	1	8.99	0.21	22.57	0.41	2.668	0.072	15.36	0.44	2.496	0.059	2.26	0.7	2.659	0.067	2.191	0.077	2.14	0.14	1.06	0.39	0.766	0.027
BTW05_49	681	29	342	18	451	24	0.59	0.18	17.93	0.83	68.2	3.6	12.24	0.66	74.7	3.9	26.3	1.4	10.94	0.55	38.1	1.9	6.74	0.29	52.6	2.1	13.58	0.72	47.1	2.3	7.74	0.34	53.8	2.6	9.33	0.34	2.19	0.74	6.67	0.31	2.94	0.14	2.96	0.21	1.15	0.33	15.22	0.57
BTW05_50	282.7	6.8	236.8	4.8	1574	46	0.274	0.046	129.6	6	696	27	128.7	5	761	27	280.7	7.8	14.38	0.44	331.2	6.8	50.8	1.3	321.9	7.8	61.6	1.4	158.1	3.8	17.48	0.38	86.3	2.1	10.13	0.23	1.32	0.56	6.83	0.23	1.6	0.066	1.55	0.14	5.16	0.18	9.26	0.21
BTW05_51	361.4	8	311.1	6.6	190.8	5.5	0.104	0.022	69.1	1.3	298.1	7.4	54.1	1.4	314.6	7.8	79.5	2.5	13.08	0.34	65.7	1.6	7.72	0.17	39.3	1	6.66	0.18	16.24	0.46	1.878	0.061	9.78	0.32	1.38	0.045	1.07	0.44	8.85	0.27	1.476	0.052	0.864	0.067	4.35	0.21	11.49	0.34
BTW05_52	243	13	224	11	129.8	8	0.057	0.018	6.76	0.37	25	1.7	4.74	0.25	31.3	1.9	15.7	1.2	6.13	0.36	23.7	1.3	3.32	0.17	20.8	1.1	4.38	0.24	11.84	0.64	1.528	0.086	9.12	0.54	1.511	0.08	3.6	1	16.87	0.72	5.2	0.23	3.32	0.25	1.35	0.1	12.46	0.56
BTW05_53	409	20	162.1	7.6	364	19	0.055	0.016	21.5	1.3	104.1	4.8	27.3	1.6	234	13	98.7	4.8	12.27	0.69	107.2	4.8	12.54	0.72	69.1	3.1	12.86	0.63	33.1	1.7	4.05	0.15	25.2	1.4	3.7	0.17	1.41	0.57	21.2	0.69	3.62	0.14	1.43	0.13	0.055	0.017	21.09	0.97
BTW05_54	304	6.2	322.1	9.3	1014	57	0.572	0.061	154	11	639	37	118.4	7.2	713	43	202	11	36.8	1.7	200	11	26.4	1.4	165.7	9.3	33.7	1.7	98.8	5.2	13.46	0.68	88.8	4.8	14.87	0.78	2.73	0.87	33.28	0.99	5.64	0.19	7.24	0.33	41.9	2.3	30.1	1.2
BTW05_55	264	11	368	17	149.7	5.6	0.246	0.027	25.6	1.4	129.9	6.6	27.3	1.5	183	10	45.3	2.1	6.45	0.36	40.2	1.9	4.48	0.2	25.4	1.2	5.62	0.21	17.29	0.67	2.69	0.12	18.67	0.62	3.22	0.11	1.58	0.61	6.1	0.25	1.913	0.073	1.48	0.11	1.9	0.13	6.55	0.2
BTW05_56	355	12	675	29	2654	82	1.06	0.12	87	10	274	29	41.3	4.2	224	19	70.5	4.6	20.15	0.75	113.3	3.9	26.58	0.95	268.4	7.9	86.6	3.1	380	11	77.5	2.9	595	22	85	2.9	21.2	2.2	24.67	0.66	20.62	0.61	21.38	0.93	15.94	0.7	8.34	0.55
BTW05_57	233.1	3.3	220.7	2.4	793	12	1.31	0.26	761	15	2184	39	282.1	4.9	1326	23	260.6	4.1	26.02	0.54	224.6	3.7	27.36	0.49	154.7	2.8	27.9	0.53	72.3	1.3	8.7	0.2	49	1.2	6.59	0.15	1.51	0.69	44.77	0.65	6.02	0.15	3.82	0.15	20.28	0.54	45.7	1.2
BTW05_58	1317	21	166.9	3	1220	20	0.49	0.14	73.9	1.6	313.8	5.5	64.2	1.3	398.4	6.7	184.6	2.7	12.41	0.29	243	3.9	43.72	0.75	280	6.7	49.8	1.1	122	2.6	15.39	0.28	87.4	1.7	10.75	0.2	3.81	0.97	9.08	0.22	4.293	0.092	4.3	0.26	2.66	0.33	18.53	0.51
BTW05_59	286.4	3.9	299.9	4	970	19	0.555	0.083	208.5	7.9	553	20	72.2	2.1	379.1	8.9	113.3	2.5	12.6	0.28	165.5	3.2	29.82	0.64	198.5	4.2	34.58	0.76	83.6	1.9	9.39	0.26	47.9	1.2	6.13	0.15	6.2	1.1	16.92	0.43	8.68	0.26	8.63	0.4	7.17	0.58	29.42	0.7
BTW05_60	488	18	273	11	437	16	0.341	0.067	1221	45	2750	110	317	11	1198	50	178.7	7.2	16.11	0.61	136.3	4.5	15.65	0.7	83.7	3.2	16.68	0.48	41.5	1.7	5.11	0.2	28.8	1.1	4.63	0.16	3.18	0.76	12.05	0.27	4.6	0.13	5.73	0.27	21.05	0.92	8.1	0.21
BTW05_61	178.9	6.9	441	19	729	34	19.8	1	389	15	1082	49	146.1	6.5	706	33	173.3	6.8	30.21	0.99	164.2	4.7	23.92	0.75	139.3	4.3	27	1	71.7	2.9	8.84	0.31	48	1.6	6.16	0.2	1.23	0.55	1.963	0.088	1.057	0.05	1.42	0.1	4.03	0.27	1.398	0.06
BTW05_62	257.7	3.8	312.2	6.3	589	10	0.072	0.023	11.91	0.28	50.6	1	10.33	0.31	70.1	1.7	30.72	0.9	11.85	0.28	55.2	1.1	10.17	0.18	82.7	1.5	20.02	0.45	62.3	1.3	8.9	0.19	53.1	1	7	0.15	1.87	0.66	8.57	0.17	2.553	0.063	1.75	0.13	5.46	0.29	6.19	0.11
BTW05_63	239.4	3.8	643.6	8	86.9	2.2	0.154	0.032	13.3	1.2	53.9	4.8	10.39	0.83	67.6	4.8	25.1	1.9	7.4	0.41	26.6	1.4	3.31	0.22	17.34	0.85	2.94	0.12	6.63	0.22	0.746	0.036	4.13	0.18	0.702	0.031	4.06	0.92	5.52	0.14	4.46	0.11	4.23	0.15	7.69	0.92	1.665	0.078
BTW05_64	373	14	270	12	309	10	0.0213	0.0088	8.1	0.42	30.4	1.3	5.44	0.29	34.4	2.2	14.85	0.76	4.72	0.23	24.8	1.1	4.7	0.17	38.5	1.7	10.04	0.48	39	1.6	5.92	0.23	39.7	1.3	6.52	0.24	5.2	1.2	5.04	0.18	4.76	0.2	4.64	0.31	8.42	0.68	1.142	0.044
BTW05_65	194.9	6.3	281.2	8.8	359	10	0.203	0.027	7.64	0.39	38.8	1.6	9.89	0.36	85.4	2.9	48.4	1.5	15.9	0.46	71.5	2.4	10.48	0.33	65.3	1.8	13	0.45	35.4	1.5	4.36	0.13	26.17	0.9	4.1	0.14	2.47	0.67	13.23	0.53	4.27	0.16	3.06	0.17	4.74	0.95	10.54	0.32
BTW05_66	123.2	4.9	276.9	9.8	716	34	0.0179	0.0078	13.5	0.97	48.3	3.6	9.32	0.5	66.3	4	37.3	2	9.53	0.48	86.4	4	18.58	0.84	139.3	5.7	24.44	0.96	47.5	2.4	3.86	0.22	13.72	0.74	1.242	0.052	8.1	1.6	10.69	0.43	7.83	0.31	8.53	0.46	2.8	0.52	10.09	0.39
BTW05_67	499	19	122.6	5.8	5660	230	0.636	0.059	233	11	1181	56	249	13	1656	93	673	36	85.6	3.2	896	48	135.7	7.6	959	49	194.5	9.2	566	30	77.8	3.6	525	25	79.9	3.1	1.83	0.68	19.3	1.5	3.03	0.17	2.76	0.18	23.2	1.4	75.2	5.7
BTW05_68	580	21	488	19	403	17	0.097	0.017	241	10	1098	48	187.2	7.4	1045	46	216.8	7.3	39.2	1.5	159.8	5.5	17.14	0.71	90.1	2.9	15.51	0.6	36.8	1.5	4.28	0.14	22.6	0.66	3.133	0.097	2.9	1	5.36	0.26	2.72	0.15	2.66	0.21	1.18	0.2	5.14	0.19
BTW05_69	386	19	262.3	9.9	36.5	2.4	0.135	0.026	16.81	0.93	55.5	3	8.85	0.48	51.9	2.9	13.75	0.92	4.89	0.24	15.33	0.88	1.76	0.13	8.97	0.75	1.5	0.12	3.34	0.24	0.331	0.034	1.62	0.17	0.327	0.031	2.35	0.62	3.77	0.18	2.67	0.12	2.75	0.13	5.87	0.82	4.39	0.38
BTW05_70	143.3	6.3	510	22	831	35	26.89	0.79	497	22	1323	67	181.4	8.5	912	32	202.8	8.7	44.2	1.4	200.5	7.7	28.24	0.87	167.3	4.8	31.1	1.1	81.8	2.6	9.55	0.31	51.6	2.3	6.49	0.16	1.62	0.61	3.2	0.1	1.658	0.068	2.39	0.2	10.87	0.56	2.285	0.09
BTW05_71	4570	170	255	11	2520	110	0.97	0.11	258	11	974	48	152.5	6.7	770	31	309	14	28.6	1.2	368	14	77.5	2.9	528	19	95.7	3.3	247.8	7.4	33.9	1.5	204	8.1	24.13	0.82	4.4	1.1	66.4	2.1	7.84	0.28	4.27	0.26	2.49	0.18	278.2	8.4
BTW05_72	711	22	295	6.7	1802	95	0.97	0.3	22.26	0.98	83.1	2.9	15.29	0.66	102.4	4.6	54.3	2.9	10.15	0.42	116.9	6.6	27.3	1.3	252	13	65.2	3.4	227	12	35.1	1.9	222	12	29.8	1.6	3.36	0.82	11.09	0.69	4.3	0.18	4.02	0.2	5.71	0.32	28.4	2.1
BTW05_73	230.5	8.3	224.9	9.3	1219	41	1.26	0.12	443	20	1843	71	319	16	1550	84	344	12	49.3	2.1	297	12	38	1.5	229.6	8.9	43.1	1.5	120.1	4.1	16.61	0.54	101.3	3.6	15.02	0.51	2.44	0.67	60.9	1.7	8.13	0.31	3.98	0.22	30.8	1.2	70.9	2.3
BTW05_74	315	11	234.4	9.5	542	20	1.24	0.1	229.9	9	569	25	72.3	3.1	349	16	94.4	3.1	29.5	1	108.8	3.5	14.76	0.42	90.1	3.6	16.85	0.55	46.7	1.7	6.91	0.25	48.5	2.3	8.74	0.33	2.52	0.76	44.2	1.7	6.93	0.25	4.92	0.29	54.2	2.1	44	1.7
BTW05_75	194.9	6	336	14	2278	75	1.84	0.11	784	31	3040	130	535	23	2930	120	646	19	57.8	1.8	572	17	75.5	2.8	443	15	84.4	2.6	218.1	7.2	29.3	1.1	176.9	6.9	24.27	0.87	1.9	0.64	32.07	0.97	4.82	0.17	4.4	0.26	34	1.6	34.7	1.1
BTW05_76	502	20	323	19	883	50	60	81	174	10	566	37	89.9	5	496	26	163.8	9.4	39	2.4	180.1	8.6	25.9	1.2	149.6	6.3	29.5	1.5	79.6	3.7	10.38	0.58	65.7	3.4	10.82	0.56	1.72	0.77	23.6	1.2	4.68	0.26	11.66	0.81	85.7	5.6	21.5	1.1
BTW05_77	266	11	2500	130	327	21	1.14	0.12	146.4	7	673	43	138.2	9.2	803	42	203	11	55.7	3	157.4	9.4	17.04	0.94	82.3	4.6	13.17	0.81	28.3	1.5	3.1	0.15	15.81	0.98	2.1	0.11	4.2	1.1	43.6	2.7	8.42	0.41	6.83	0.41	21.1	1.5	38.8	2.4
BTW05_78	108.7	4.4	289	13	684	26	0.092	0.064	65.9	3.3	255	11	49.3	2.5	294	13	136.7	5.8	21.27	0.85	203.9	7.8	35.1	1.3	195.2	6.8	25	1	36.6	1.3	2.206	0.096	7.1	0.34	0.747	0.037	8.3	1.1	13.22	0.45	8.66	0.35	8.58	0.51	1.88	0.28	16.81	0.63
BTW05_79	291	11	755	36	168.4	7.4	1.004	0.072	441	17	1604	50	211	8	948	44	154.4	6	34.3	1.4	95.8	4.7	9.06	0.43	40.9	1.7	6.35	0.22	13.72	0.57	1.497	0.061	7.92	0.34	1.116	0.053	2.1	0.63	11.91	0.4	3	0.16	3.46	0.24	17.5	1	16.08	0.61
BTW05_80	793	23	312	12	1008	43	1.5	1.3	57	2.3	248	10	42.4	1.7	264	12	118.4	5	14.61	0.58	184.3	6.8	34.9	1	232.8	8.3	39.5	1.2	84.8	3.7	10.02	0.42	60.6	2.4	7.47	0.27	9.3	1.4	15.49	0.48	10.67	0.29	10.34	0.49	1.74	0.23	18.4	0.64
BTW05_81	774	29	329	12	297	19	1.03	0.17	6.75	0.53	27.7	2.3	5.08	0.43	35.3	3.1	15.5	1.1	2.38	0.2	28.8	2.2	5.5	0.37	43.5	2.3	11.33	0.63	39.7	2.2	6.76	0.36	49.2	2.5	8.48	0.37	6.6	1.3	8.89	0.35	6.63	0.21	6.64	0.3	1.11	0.21	8.64	0.63
BTW05_82	262.8	9.9	502	16	579	32	19.75	0.6	259	15	805	49	112.9	6.1	573	22	135.3	5.4	34.1	1.5	141.9	4.6	18.06	0.55	105.5	4.5	18.89	0.83	47.7	2.2	5.58	0.28	31.9	1.8	4.12	0.22	0.99	0.52	1.79	0.11	1.223	0.074	1.53	0.16	3.66	0.53	0.813	0.043
BTW05_83	444.4	4.4	317.7	5.5	374.5	8.7	0.047	0.019	12.9	1	46.4	4.3	8.33	0.78	49.8	4.8	20.4	2.2	7.72	0.52	30.9	2.1	5.88	0.32	47.7	1.8	12.09	0.3	41.9	1.1	6.64	0.2	41.77	0.99	5.91	0.11	2.41	0.92	2.67	0.39	1.91	0.34	2.13	0.49	6.47	0.96	0.961	0.027
BTW05_84	192.5	9.1	265	13	1172	52	0.325	0.031	339	19	1529	69	251	11	1365	72	319	13	30.1	1.6	283	11	36.2	1.6	214.4	9.1	41.4	1.7	109.7	5	14.11	0.7	80.2	3.2	11.56	0.55	1.52	0.51	44.8	1.8	6.41	0.26	2.17	0.13	8.92	0.98	48.2	2.1
BTW05_85	506.5	5.2	495.2	5.5	221	3.4	0.243	0.04	50.9	1.2	352.3	8.1	79.2	1.8	479	12	104.9	2.5	18.39	0.38	75.4	1.8	7.93	0.18	40.59	0.83	7.18	0.15	18.69	0.33	2.447	0.061	15.23	0.34	2.412	0.079	0.29	0.33	20.7	1.8	2.08	0.16	0.45	0.065	1.014	0.083	30.8	2.9
BTW05_86	672	25	354	15	703	43	0.32	0.043	265	18	703	42	95.8	5.9	484	25	111.5	4.1	38.6	1.4	112.5	4.2	14.45	0.56	88.6	3.6	19.1	1	62.1	3.6	9.63	0.62	68.7	4.8	13.39	0.93	2.38	0.57	28.3	2.2	4.91	0.29	4.51	0.24	27.2	1.5	27.2	1.9
BTW05_87	523	14	400.5	6	1071	28	0.263	0.046	30.7	2.4	154.1	8.3	38.3	1.5	313	8.6	154.3	4.3	26.78	0.69	190	4.5	27.22	0.64	173.1	4.5	35.8	1	102.5	3.1	13.58	0.42	79.8	2.4	11.16	0.4	1.91	0.62	14.85	0.34	3.09	0.16	2.37	0.24	12.5	1.1	18.4	0.74
BTW05_88	156.4	7.3	921	32	286	10	1.69	0.35	123.2	4.9	472	20	76	3	414	14	113.7	5.2	28.2	1.6	115.3	4.9	13.52	0.62	70.6	3	11.44	0.42	25.43	0.89	2.67	0.12	13.52	0.61	1.802	0.083	2.05	0.61	10.51	0.45	3.33	0.14	4.45	0.23	42.2	3	7.62	0.35
BTW05_89	702	23	478	19	104	5	0.43	0.1	207	10	386	21	39.4	2	197	10	37.6	1.6	7.74	0.64	36.2	1.9	4.26	0.28	23.9	1.4	4.16	0.24	8.78	0.44	0.984	0.047	5.01	0.26	0.816	0.047	2.6	0.77	5.81	0.32	2.99	0.14	3.39	0.26	16.6	1.7	4.14	0.58
BTW05_90	560	14	391.1	8.9	476	68	620	220	135	21	498	75	73	11	412	60	111	15	17	1.9	112	15	14.3	1.9	85	10	16.2	2.3	41.8	6	4.84	0.66	26.3	3.7	3.98	0.58	1.37	0.51	4.8	0.33	2.33	0.088	2.55	0.19	13.4	1.8	4.81	0.64
BTW05_91	444	17	393	17	1394	58	0.12	0.038	13.11	0.99	60.3	3.5	10.86	0.68	86.4	4.3	55.7	1.6	12.53	0.55	117.6	4.6	26.02	0.9	222.6	8	50	2.4	138.1	3.8	15.99	0.49	77.1	2.7	8.56	0.3	11.6	1.8	14.71	0.49	11.73	0.39	11.5	0.58	4.7	1.6	11.15	0.36
Sample 3		Location: Bunatrahir West			Grid Coordinates: 54°18'31.6''N, -9°23'35.6''W
	Mn55	2σ	Sr88	2σ	Y89	2σ	Zr90	2σ	La139	2σ	Ce140	2σ	Pr141	2σ	Nd146	2σ	Sm147	2σ	Eu153	2σ	Gd157	2σ	Tb159	2σ	Dy163	2σ	Ho165	2σ	Er166	2σ	Tm169	2σ	Yb172	2σ	Lu175	2σ	Pb204	2σ	Pb206	2σ	Pb207	2σ	Pb208	2σ	Th232	2σ	U238	2σ
BTW6b_0	234.5	7.9	485	14	886	31	12.78	0.49	494	16	1332	44	184.8	5.5	893	26	211.3	5.7	42.9	1.1	212.3	5.5	28.19	0.77	170.2	4.8	30.85	0.96	76.1	2.3	9.45	0.27	50.4	1.5	6.26	0.2	2.02	0.53	3.197	0.088	2.048	0.068	2.36	0.13	6.82	0.3	1.753	0.039
BTW6b_1	279.9	9.5	254	10	1137	54	0.763	0.06	1355	57	3650	180	449	21	1837	72	297	12	32.1	1.5	249.8	9.1	29.8	1.5	176.9	7.4	37	1.6	105.1	4.6	15.82	0.76	99.3	3.6	16.49	0.67	3.38	0.91	81.5	4.3	12.6	0.62	19.7	1.3	113.6	5.4	76	3.8
BTW6b_2	422	12	227.2	7.6	689	22	0.188	0.039	533	17	1639	58	217.3	7.2	975	27	199.9	5.7	13.51	0.45	172.5	5	21.46	0.64	126.1	4.6	23.68	0.78	63.9	1.7	8.5	0.23	50.1	1.3	7.69	0.26	3.6	1	17.45	0.56	5.02	0.15	6.04	0.22	19.38	0.57	13.92	0.34
BTW6b_3	408	12	526	14	264	8.9	0.432	0.061	573	25	1129	54	124.5	4.8	521	17	91.8	3.5	22.67	0.85	71.6	2.9	8.53	0.28	48.6	1.8	9.14	0.29	23.99	0.78	3.34	0.14	20.14	0.73	3.27	0.13	1.48	0.51	9.85	0.25	3.124	0.083	4.45	0.27	14.21	0.49	6.67	0.15
BTW6b_4	372	12	477	21	952	24	12.87	0.61	581	23	1512	72	206.9	6.9	982	29	229.5	6.8	41.7	1.3	215	5.6	30.48	0.91	180.9	5.3	33.71	0.96	84.6	2.1	10.43	0.32	56.3	1.5	7.04	0.18	1.38	0.49	2.543	0.075	1.25	0.048	1.533	0.088	4.8	0.25	1.907	0.059
BTW6b_5	366	10	188.2	6.2	2167	83	0.44	0.058	385	17	1837	98	316	12	1688	81	415	15	24.7	1.1	366	15	56.6	1.6	362	13	73.3	2.6	218	8.6	33.5	1.1	221.6	7.3	33.1	1	2.69	0.86	71.6	2.9	10.04	0.31	9.66	0.4	50.5	2.6	71.6	3.3
BTW6b_6	328	13	197.8	6.6	351	49	0.22	0.1	248	42	850	130	120	18	595	87	118	17	32	1.1	94	13	11	1.7	61.8	9.6	11.7	1.7	31.7	4.9	3.98	0.62	24	3.6	3.9	0.5	4.8	1.2	6.95	0.47	4.9	0.17	5.35	0.37	7.4	2	2.84	0.42
BTW6b_7	223	5.3	508	14	666	20	12.58	0.38	318.3	8.9	938	35	134.5	4.6	664	17	164.3	5.2	38.8	1.1	161.4	4.5	21.28	0.64	125.9	3.3	22.98	0.66	57.9	1.8	7.08	0.2	39.1	1	4.87	0.14	0.76	0.37	1.485	0.084	0.937	0.053	1.11	0.1	2.59	0.12	0.633	0.021
BTW6b_8	690	18	232.1	6.9	370	10	0.441	0.093	941	28	2014	70	194.1	7.4	713	19	98.5	2.7	25.9	0.7	77.4	1.8	9.02	0.24	54.4	1.5	11.12	0.32	32.34	0.94	4.82	0.15	33.49	0.9	6.26	0.16	3.71	0.93	48.7	1.2	9.07	0.57	8.89	0.44	37.3	1.5	40.2	1.1
BTW6b_9	386	12	254.8	8.3	1291	46	0.187	0.034	114.1	4.6	857	23	196.4	6.2	1224	43	345.8	8.5	26.87	0.8	293.2	8.5	37.9	1.1	222.9	7	43.3	1.4	120.4	2.5	16.63	0.38	105.3	3.1	14.66	0.37	2.5	0.79	49.7	1.2	7.27	0.2	3.87	0.2	13.71	0.58	55	1.4
BTW6b_10	552	18	599	20	250.5	7.4	0.095	0.031	64.2	1.8	319.7	9.7	63.9	2.1	376	11	88.1	2.9	18.14	0.7	78	2.3	8.5	0.23	46.6	1.3	8.66	0.22	21.39	0.71	2.567	0.085	14.36	0.56	2.392	0.082	3.19	0.94	4.69	0.17	3.4	0.11	3.11	0.19	0.957	0.065	1.9	0.067
BTW6b_11	433	13	242.8	8	426	17	0.27	0.15	108.6	3.4	380	14	61.5	2.6	325	12	93.5	4.6	20.57	0.89	98.5	4.5	12.73	0.76	70.1	3.3	13.49	0.54	37.1	1.2	4.89	0.16	34.7	1.4	7.12	0.35	4.5	1.1	12.22	0.67	4.94	0.63	5	0.72	14.5	1.4	7.85	0.38
BTW6b_12	231.7	4.5	1219	26	235.5	5.5	0.298	0.054	628	15	1209	36	130.9	3.8	601	14	108.9	2.5	18.23	0.51	87.3	2.3	9.04	0.25	47	1.4	8.36	0.24	20.36	0.64	2.349	0.076	13.61	0.37	2.184	0.068	2.13	0.51	20.69	0.51	4.54	0.19	6.63	0.35	29.97	0.89	17.17	0.33
BTW6b_13	3050	95	201.7	6.8	2747	90	0.074	0.02	81.6	2.7	389	12	84.2	3.2	579	22	311	10	22.49	0.72	440	12	79.3	2.2	543	19	103.4	2.9	257.6	6.8	30.9	1	168.5	6.4	21.04	0.65	5.1	1	21.22	0.6	6.59	0.15	5.36	0.26	6.35	0.25	18.87	0.52
BTW6b_14	540	10	261.9	6.7	994	57	2.06	0.39	276	13	953	48	137.7	5.8	740	37	182.9	9.8	43.4	2.6	166.5	7.7	21.4	1.1	129	7	27.9	1.5	82.9	4.3	12.19	0.74	83.3	5	15.93	0.94	3.01	0.74	22.5	1.6	5.73	0.23	6.23	0.38	22.3	2.7	19.5	2
BTW6b_15	479	15	244.2	6.4	1258	25	0.663	0.068	2168	65	5010	130	602	14	2496	58	408.5	9.1	23.09	0.7	323.1	6.4	39.56	0.96	229.1	5.6	44.3	1	118.4	3.1	15.34	0.31	90.2	1.8	13.27	0.3	4.25	0.91	24.07	0.97	6.72	0.27	11.46	0.55	48.1	1.8	17.84	0.73
BTW6b_16	4650	150	356	11	1876	76	0.349	0.056	211.8	9.3	805	31	127.1	5.2	642	26	243.2	8.7	15.28	0.88	286.9	9.2	56.4	2.1	389	12	74.7	2	203	6.9	28.78	0.73	177.4	5.4	22.87	0.75	9.5	1.7	26.25	0.84	8.96	0.4	8.39	0.49	5.52	0.35	78	2.4
BTW6b_17	383.4	6.3	315.1	5.6	234.5	7.5	1.031	0.081	1483	36	1814	41	151.5	3.6	553	14	80.1	2.3	14.59	0.5	69.1	2.5	7.95	0.28	45.8	1.9	8.71	0.28	22.66	0.85	2.81	0.1	16.87	0.55	3.03	0.11	4.17	0.79	7.67	0.16	4.097	0.08	5.9	0.21	20.08	0.7	4.39	0.11
BTW6b_18	476	11	987	23	492.4	9.8	2.48	0.12	704	22	1944	50	245.1	6.8	1148	35	220.6	4.5	16.78	0.46	160.8	3.8	18.37	0.48	98.1	1.8	17.44	0.43	43.1	1.1	5.5	0.17	30.4	1	4.37	0.13	3.55	0.77	92.1	2.1	13.9	0.36	12.04	0.42	64.1	2.2	85.3	2.1
BTW6b_19	281.4	8.5	740	25	433.3	9.3	2.41	0.17	786	21	2147	57	283.8	7.9	1228	36	230	7.5	16.41	0.41	171.1	4.3	18.04	0.42	91.4	2.3	15.4	0.39	36.4	1.2	4.14	0.14	22.48	0.79	2.95	0.084	1.54	0.53	72.5	1.8	9.38	0.28	9.22	0.32	57.6	1.7	69.1	1.6
BTW6b_20	287.6	8.5	1005	31	276.8	8.1	8.15	0.35	656	20	1669	67	203.7	4.9	909	26	156.9	4.6	18.02	0.46	112.3	3.4	11.84	0.34	61.3	1.7	10.23	0.32	23.76	0.73	2.802	0.089	14.67	0.43	2.04	0.07	2.32	0.62	49.4	1.4	7.25	0.2	12.74	0.43	75.1	2.1	46.7	1.1
BTW6b_21	252.7	5.9	429	10	77.7	2.7	0.484	0.061	821	25	1215	45	91	3.3	298	12	32.6	1.4	8.95	0.25	25.48	0.79	2.398	0.087	12.4	0.35	2.45	0.11	6.5	0.26	0.764	0.037	4.96	0.21	0.997	0.03	6.5	1.2	35.7	1.3	9.59	0.52	9.68	0.58	27.8	1	35.2	1.2
BTW6b_22	467	13	360	10	1203	45	0.518	0.06	169.5	7.6	995	45	222	8.6	1487	61	410	11	108	4	342	12	42.9	1.5	238.6	8.7	43.8	1.2	112.8	3.2	13.95	0.55	82.7	2.6	11.62	0.35	1.95	0.52	10.41	0.29	2.928	0.092	2.2	0.13	2.74	0.19	9	0.27
BTW6b_23	317	11	261.4	8.3	550	32	0.28	0.053	630	38	1760	110	221	11	920	52	159.6	8.8	16.69	0.78	129.6	6.4	15.38	0.9	93.7	5.7	18.3	1	50.8	3.1	6.91	0.42	41.6	2.5	6.92	0.4	3.5	1	34.5	3	6.74	0.4	9.03	0.87	41.6	4.9	31.4	2.9
BTW6b_24	361.7	9.9	260.8	5.8	377.4	9.3	1.23	0.13	664	16	1499	31	155.7	5.6	577	18	90.4	2.6	19.73	0.56	74.3	2.1	8.8	0.26	53.3	1.5	11.58	0.28	35.65	0.8	5.52	0.18	40.7	1.1	7.67	0.19	6.3	1.3	52.9	1.1	11.14	0.42	9.92	0.58	31.7	1	45.2	1.2
BTW6b_25	171.9	7.2	332	10	623	14	0.063	0.026	77.1	2.6	311.8	9.3	56.1	2.1	325.3	9	157.7	4.3	22.66	0.65	228.4	4.7	41.8	1	210.7	7	22.36	0.64	25.4	0.69	1.365	0.047	3.68	0.17	0.294	0.016	7.3	1.4	11.7	0.36	7.78	0.25	7.86	0.38	3.33	0.37	14.86	0.51
BTW6b_26	277.9	9.9	306.3	8.4	1243	39	0.181	0.035	159	5.2	788	31	152.7	5	874	30	258.5	7.2	37.87	0.8	253.1	6.6	33.88	0.83	206.8	6.4	41	1.2	117.8	2.9	15.88	0.52	98.6	2.7	16.1	0.43	2.47	0.77	25.69	0.65	5.12	0.12	5.63	0.31	21.49	0.71	23.63	0.54
BTW6b_27	230.9	5.4	290.9	9	364.8	8.3	0.227	0.036	191.5	7.9	618	29	82.4	3.3	394	13	84.1	2.2	19.17	0.46	78.5	2.5	10.1	0.31	59.8	1.8	11.89	0.34	34.86	0.93	5.13	0.18	35.7	1	6.9	0.19	1.92	0.58	46.3	1	7.24	0.2	6.39	0.35	31.45	0.98	41.5	0.96
BTW6b_28	438	11	288.4	6.9	1220	37	1.04	0.1	301	9.3	1558	66	274.1	9.9	1432	53	318	10	58.6	1.5	275.9	7.1	36.3	1.2	215.8	6.7	42.8	1.2	116.1	3.8	16.25	0.54	102.8	3.3	14.97	0.43	1.49	0.48	20.16	0.63	3.48	0.13	1.94	0.14	4.27	0.19	22.41	0.56
BTW6b_29	234.3	7.8	509	19	815	30	12.17	0.44	392	16	1161	44	158.5	5.8	781	22	187.6	5.8	38.1	1.1	184.7	5.2	24.57	0.7	148.2	4.5	26.72	0.64	67.5	2.6	8.12	0.29	44.4	1.3	5.69	0.19	0.95	0.4	1.472	0.058	0.945	0.036	1.26	0.1	3.9	0.44	0.75	0.022
BTW6b_30	137.4	5.4	469	16	417	14	1.87	0.15	406	87	1300	180	188	22	881	76	180	11	29.4	1.2	142.1	5.2	16.77	0.67	89	2.3	15.4	0.39	36.17	0.99	4.33	0.15	23.82	0.92	3.064	0.096	1.85	0.54	6.33	0.26	1.97	0.088	3.01	0.29	14.2	1.2	6.4	0.17
BTW6b_31	341	7.4	192.8	4.2	3195	76	3	0.2	789	21	3544	97	637	18	3257	79	799	22	69.8	1.4	699	16	95.8	2.1	581	13	111.3	2.5	308.6	7.3	42.6	1	258.9	6.1	37.92	0.94	3.99	0.99	241.9	5.2	28.46	0.55	15.24	0.53	99.7	2.7	275.8	6.8
BTW6b_32	721	20	393	13	2344	83	0.814	0.092	557	17	2470	110	461	21	2618	83	648	21	95	3.6	543	17	71.5	2.2	423	11	81.3	2.3	221.5	5.8	30.5	1.1	183.3	6	24.66	0.63	4.7	1.1	139.4	3.7	19.63	0.64	7.55	0.71	20.76	0.76	141.7	3.7
BTW6b_33	390	12	637	27	82.3	4.2	0.09	0.028	8.11	0.43	40.8	2.5	8.07	0.42	56.9	3.1	17.72	0.94	6.39	0.25	22.78	0.95	2.61	0.11	14.46	0.61	2.87	0.12	7.86	0.34	1.059	0.057	7.15	0.36	1.268	0.056	4.12	0.79	9.19	0.27	4	0.16	2.9	0.19	0.59	0.039	5.12	0.18
BTW6b_34	199	6.2	649	19	445	15	0.085	0.025	49.2	1.6	265	13	58.2	2.5	374	18	122.6	3.2	22.18	0.88	119.3	4.4	15.69	0.5	89.2	3.5	16.45	0.53	41.9	1.4	5.24	0.17	28.6	1.1	3.96	0.12	3.7	1	5.03	0.32	3.9	0.21	4.05	0.32	1.9	0.28	2.969	0.09
BTW6b_35	255.3	6.3	247	6.5	148	11	0.027	0.013	0.741	0.08	3.69	0.33	0.888	0.087	8.3	0.77	5	0.49	1.76	0.12	12.4	1	2.35	0.17	19.2	1.6	4.93	0.38	17.1	1.2	2.82	0.2	18.9	1.5	3.21	0.23	1.72	0.56	6.47	0.62	2.59	0.1	2.13	0.16	0.59	0.12	4.3	0.64
BTW6b_36	443	14	286.2	7.8	2412	77	0.539	0.053	244.9	6.7	1111	38	228	7.5	1497	52	496	16	37.2	1.1	482	13	70.3	2.1	430	11	85.6	2.7	235.9	7.5	31.2	0.86	183.5	4.3	25.44	0.61	2.17	0.65	45.3	1.5	7.6	0.22	12.25	0.5	70.6	2.6	40.2	1.1
BTW6b_37	322.5	8.2	416	16	387	13	0.155	0.035	100.5	4.4	392	18	63.8	2.3	347	12	91.5	3	18.51	0.5	90.6	2.2	11.34	0.37	66	2.2	12.17	0.35	36	1.1	5.27	0.16	36.9	1.3	6.74	0.22	1.67	0.55	40	1.3	6.27	0.25	4.18	0.17	18.38	0.8	40.6	1.4
BTW6b_38	407	15	552	18	1597	46	0.609	0.06	1067	35	3570	130	551	17	2682	91	528	18	86.3	2.2	410	14	48.9	1.6	288.3	9.5	55.5	1.4	149.7	4.4	20.38	0.53	132.9	2.6	20.48	0.53	5.9	1	77.6	1.6	13.99	0.38	21.88	0.79	109.9	3.6	70.2	1.6
BTW6b_39	357	13	403	13	559	19	0.17	0.04	762	34	2000	81	240.9	8.6	1082	46	208.9	8	21.18	0.66	173.8	6.3	20.6	0.74	115.3	3.1	20.54	0.64	52.7	1.9	6.87	0.23	38.9	1.4	5.37	0.16	1.93	0.68	9.35	0.3	3.6	0.13	4.4	0.24	12.3	0.68	6.06	0.23
BTW6b_40	343	11	621	18	385	13	0.651	0.089	215	7.8	909	32	148.8	6.1	764	26	161.7	5.7	45.3	1.5	122.5	3.8	13.91	0.45	80.3	2.5	14.32	0.48	36.34	0.89	4.6	0.13	27.62	0.93	4.02	0.11	1.25	0.56	47.9	1.6	6.26	0.25	2.5	0.17	9.4	0.39	52.6	1.6
BTW6b_41	408	10	169.6	4.3	2880	110	0.631	0.084	264.8	9.1	1515	50	337	11	2132	61	592	19	80.7	2.2	576	19	79.8	2.6	509	17	100.3	3.2	272.3	8.6	37.5	1.3	221	7.3	31.61	0.98	3.52	0.88	44	2	6.4	0.26	4.81	0.22	41.2	2	116.7	3.7
BTW6b_42	896	25	228.1	6.2	1498	39	0.067	0.031	92.7	1.9	336.5	8.1	63.7	1.8	414	12	192.7	5.6	23.28	0.53	258.1	8.2	46.7	1.2	309.1	8.2	55.4	1.1	141.2	4	18.53	0.46	102.5	2.9	12.62	0.32	3.23	0.77	5.5	0.13	3.059	0.088	2.76	0.12	1.43	0.12	3.024	0.079
BTW6b_43	221.8	6.2	111.3	3.9	193.1	5.4	0.021	0.012	1.94	0.11	12.11	0.59	3.43	0.18	32.2	1.4	24.3	1	9.6	0.32	38.5	1.3	5.71	0.18	35.3	1	6.68	0.16	17.51	0.55	2.275	0.076	13.46	0.43	2.04	0.071	2.53	0.84	3.047	0.087	2.51	0.089	2.5	0.11	0.021	0.008	1.243	0.043
BTW6b_44	242.7	3.9	258.9	3.6	1463	28	0.679	0.072	291.2	6	1223	23	218.8	4.6	1221	26	325.1	6.2	39.17	0.84	316.4	6	42.23	0.8	264	5.6	51.78	0.96	144.6	2.9	19.59	0.41	126.4	2.8	18.33	0.32	3.88	0.92	81.7	2	11.57	0.29	4.69	0.24	15.04	0.85	80.3	2
BTW6b_45	270	13	291.2	9.8	217	18	0.78	0.1	1.49	0.21	4.15	0.26	0.886	0.079	6.45	0.53	4.54	0.34	2.94	0.26	13.7	1.1	2.79	0.2	26.6	2.3	7.21	0.52	25.6	2	3.98	0.32	27.7	2.1	5.08	0.38	1.56	0.6	18.1	1.1	3.55	0.2	1.79	0.14	2.7	0.16	15.38	0.91
BTW6b_46	374	13	538	15	926	35	0.488	0.081	1229	41	3210	120	408	17	1818	74	308.2	9.8	58.5	2.1	221.9	6.6	27.3	1.1	153	6.1	30	1.3	83	3.4	11.74	0.46	72	2.6	10.61	0.31	3.08	0.6	51.1	1.5	8.57	0.26	13.52	0.65	74.3	2.8	45.8	1.5
BTW6b_47	293	8.5	220	6.4	1075	34	0.55	0.14	253.7	7.8	1307	45	234.7	9	1301	42	312	10	36.3	1.5	266.9	7.3	32.19	0.88	189.4	6	35.3	1.1	95.3	2.2	12.35	0.38	76.3	2.6	12.68	0.31	3.7	1.1	38.22	0.97	8.15	0.24	9.66	0.37	46.5	1.8	36.53	0.93
BTW6b_48	330.1	8	135.3	4.1	688	80	0.432	0.063	47.1	2.7	157	10	26.6	1.7	166	11	75.3	6.4	18.1	1.4	115.2	9.5	17.5	1.7	111	11	23.1	2.6	63	7.4	8.1	0.98	53.2	8	8.8	1.2	6.3	1.2	7.86	0.52	5.68	0.23	5.85	0.27	12.92	0.8	7.1	1.6
BTW6b_49	395	14	208.1	5.1	532	24	0.175	0.034	1429	62	3100	140	322	16	1220	64	180	8.6	13.82	0.73	136.9	5	15.84	0.61	92.8	3.6	18.21	0.8	49.3	2.5	6.22	0.32	39.6	1.9	7.01	0.32	2.67	0.81	19.45	0.99	5.1	0.19	6.34	0.33	21.1	1.1	14.52	0.72
BTW6b_50	170	5.1	389	12	404.2	9.6	3.9	1.8	210.3	6.5	687	21	116.8	3.3	637	18	147.9	4.3	21.94	0.55	128.4	3.6	15.31	0.39	86.4	2.1	14.65	0.36	36.02	0.91	4.26	0.12	23.62	0.66	3.111	0.089	3.46	0.9	7.61	0.3	3.21	0.2	3.51	0.24	10.18	0.42	7.05	0.14
BTW6b_51	356	15	240.1	8.1	1673	55	0.478	0.073	319	10	1411	63	236.6	9.5	1367	50	366.2	8	73.7	2.8	347	12	43.9	1.9	268	9.4	53.2	2	149.5	5.2	20.57	0.75	129.3	4.5	21.82	0.8	4.1	1	54.9	1.9	8.72	0.29	7.79	0.37	35.7	1.7	53.7	2
BTW6b_52	420.5	4.3	336.5	4.3	800	15	0.78	0.1	135.8	2.4	674	10	123.8	2.1	736	14	181.3	4.4	28.55	0.54	169.1	3	20.65	0.36	122.5	2.7	25.48	0.44	73.4	1.4	9.87	0.28	64	1.2	11.41	0.22	3.49	0.94	13.24	0.37	3.83	0.17	4.98	0.24	17.07	0.41	11.95	0.23
BTW6b_53	332.1	9.4	183.9	7.3	2410	84	0.953	0.08	1187	32	4550	200	746	21	3660	100	730	23	122	3.7	571	18	68.9	2.2	399	11	76.2	2.2	216.6	6.2	28.81	0.92	182.2	5.5	31.2	1.1	4.8	1	54	1.7	10.18	0.29	17.41	0.69	99.9	4.6	51.6	2.1
BTW6b_54	269.4	7	204	4.8	2110	55	0.6	0.075	261.8	7.6	1569	38	351.7	7.7	2102	47	531	12	56.5	1.6	459	11	57.1	1.4	337.1	7.8	67	1.2	188.5	4	25.5	0.52	158.6	3.1	26.92	0.6	5.3	1.2	63.8	1.7	10.61	0.26	17.64	0.56	120.3	3.9	70.3	1.9
BTW6b_55	440	16	574	14	50.4	3.1	0.195	0.039	399	11	503	21	36.8	1.2	127.7	4.6	17.34	0.74	4.39	0.17	15.35	0.92	1.61	0.12	8.36	0.55	1.631	0.096	4.31	0.32	0.49	0.037	3.07	0.19	0.58	0.028	3.87	0.93	9.54	0.48	3.87	0.34	4.42	0.46	8.15	0.49	5.64	0.14
BTW6b_56	302.1	9.3	255	12	667	25	0.485	0.061	721	36	2089	94	247	11	1013	48	182.1	7.9	13.04	0.71	149.6	6.1	19.33	0.88	116	4.2	22.5	0.91	62	2.5	8.74	0.39	57.5	1.6	9.51	0.31	3.6	0.81	74.3	2.8	11.16	0.44	15.3	0.72	75.7	5	65.3	2.7
BTW6b_57	323.2	8.5	389	12	491	16	0.8	0.13	322	11	1177	40	175.3	5.6	862	30	168.3	5.4	30.37	0.8	137.7	5.4	15.25	0.5	85.4	3	16.31	0.48	45.1	1.4	5.86	0.22	36.9	1.4	6.83	0.27	3.8	1	54.8	1.3	8.72	0.4	8.68	0.58	40.7	1.9	51.1	1.4
BTW6b_58	48.6	1.8	402	14	501	14	0.0064	0.0072	13.12	0.59	44.3	2.1	8.74	0.45	57.4	2.2	27.9	1.1	7.57	0.25	58.7	1.8	11.95	0.33	92.9	2.7	17.58	0.54	40.7	1.1	4.05	0.15	17.64	0.66	1.835	0.064	8.5	1.1	10.17	0.29	8.77	0.22	8.64	0.29	0.63	0.15	3.08	0.11
BTW6b_59	372	18	506	21	533	19	11.26	0.48	249.9	7.9	773	36	107	4.3	564	23	142.9	4.8	33.6	1.2	149.5	4.8	18.83	0.67	112.3	3.4	20.06	0.7	47.5	1.7	5.37	0.22	27.56	0.99	3.66	0.1	1.43	0.55	1.88	0.1	1.24	0.11	1.58	0.15	6.82	0.7	0.806	0.026
BTW6b_60	432.7	5.2	1448	17	290.4	4.4	5.6	0.19	459.8	7	1213	15	162.5	2.3	821	11	157.8	2.1	27.23	0.39	120.8	2	12.57	0.22	63.2	1.2	10.75	0.17	24.5	0.49	2.776	0.066	14.68	0.33	2.01	0.046	3.29	0.87	14.27	0.4	4.32	0.2	5.66	0.3	20.09	0.53	10.63	0.18
BTW6b_61	251	14	497	20	437	16	0.251	0.049	182	7.4	841	26	139	5.3	745	27	158.8	5.7	26.82	0.95	129.1	3.6	15.32	0.51	86.7	3.4	15.83	0.57	41.5	1.3	5.6	0.21	33.43	0.99	4.82	0.14	6.3	1.6	11.8	1.3	6.7	1	6.6	1.2	4.38	0.52	8.47	0.29
BTW6b_62	399.7	7.5	496.6	8.5	323.3	7.6	0.28	0.064	455	11	1187	27	155.8	3.8	726	14	132.8	2.9	18.29	0.35	108.9	2.3	11.94	0.23	64.8	1.2	11.78	0.26	30.06	0.74	3.608	0.083	20.35	0.52	3.086	0.075	5.7	1.1	16.78	0.43	7.11	0.2	8.52	0.38	22.67	0.58	12.39	0.4
BTW6b_63	207.3	7.7	238.4	8.3	1028	30	0.087	0.029	33.8	3.7	157	11	36.1	2.4	278	19	132.9	5.6	19.58	0.52	178.1	6.6	26.4	1.2	165.7	6	34	1.1	94.6	3	12.03	0.4	74.6	2.6	12.09	0.36	2.79	0.9	13.82	0.5	3.99	0.15	3.69	0.2	9.66	0.48	11.22	0.4
BTW6b_64	203.8	4.4	399	5.7	87.9	2.5	0.335	0.076	26.24	0.73	91.3	2.1	15.2	0.43	81.7	2.1	21.08	0.64	5.44	0.17	23.89	0.66	2.94	0.11	16.39	0.39	3.02	0.1	7.91	0.26	1.039	0.04	6.68	0.23	1.339	0.045	7.2	1.3	10.61	0.38	7.41	0.31	7.3	0.37	3.99	0.12	3.3	0.13
BTW6b_65	276.4	8	539	14	76.4	2.7	0.214	0.039	60.3	2.5	209.3	9.1	27.54	0.81	139.9	4	27.25	0.99	8.94	0.34	23.45	0.91	2.364	0.092	13.03	0.39	2.501	0.074	6.85	0.28	0.918	0.04	6.44	0.26	1.29	0.044	2.75	0.81	20.49	0.47	4.53	0.14	3.63	0.17	7.81	0.4	18.14	0.36
BTW6b_66	322.4	8.8	241.1	7.8	1123	49	0.402	0.065	211.5	5.8	1017	37	192.9	6.7	1034	40	253.1	8.4	41	1.6	222.4	6.6	29.6	1	186.5	8.2	36.8	1.2	107.1	4.1	15.65	0.55	102.1	2.9	15.85	0.61	3.16	0.68	48.1	2	8.05	0.32	5.56	0.26	18.41	0.93	44.2	2.4
BTW6b_67	220	5.7	675	31	429	13	0.117	0.028	69.1	3.2	294	12	56.6	2.3	360	11	108.1	3.8	9.93	0.32	115.9	3.7	15.03	0.44	86.8	2.7	16.17	0.58	40.5	1.3	4.41	0.14	20.73	0.73	2.617	0.085	1.64	0.57	3.69	0.13	1.896	0.089	2.13	0.14	3.93	0.16	1.961	0.05
BTW6b_68	387	12	1098	41	151.4	6.1	0.833	0.092	209.9	9.8	667	28	95.6	3.4	488	19	97.8	4.8	19.62	0.89	74.2	2.6	7.59	0.3	36.8	1.6	5.79	0.19	12.06	0.51	1.287	0.057	6.61	0.36	0.843	0.036	2.6	0.7	5.2	0.32	2.95	0.23	3.38	0.36	5.12	0.28	2.255	0.081
BTW6b_69	300.5	7.7	291.6	8	345	26	0.02	0.012	32.2	2.6	147	12	30.8	2.3	193	16	61.8	4.5	9.52	0.58	66.2	5.1	8.9	0.69	56	4.9	11.41	0.91	32.2	2.6	4.49	0.36	28	2.3	4.44	0.36	1.67	0.55	10.91	0.93	2.96	0.12	2	0.13	1.282	0.086	8.82	0.84
BTW6b_70	460	13	284.5	6.6	2625	96	3.57	0.21	1446	39	4800	140	684	27	3210	110	662	21	138.9	4	581	15	75.5	2.1	441	14	86.7	3.1	247.7	8.2	34.7	1.2	208.2	8.5	34.9	1.2	2.83	0.75	445	11	51.4	1.4	63.7	2	469	19	505	12
BTW6b_71	371	15	168.7	7.2	1966	77	1.32	0.32	401	19	1910	100	332	19	1703	80	387	11	60.4	2.2	344	13	45.8	1.4	296	12	60.5	2.4	180.2	6.4	25.64	0.95	169.1	6.2	27.37	0.94	4.88	0.97	62.5	2.4	10.02	0.32	8.66	0.55	34.4	1.6	62.5	2.4
BTW6b_72	340	8.3	635	15	340.6	8.1	1.46	0.29	25.28	0.79	138.1	5.3	33.39	0.89	265.6	9.1	95.8	3.3	14.33	0.39	97.1	2.3	11.88	0.3	66.5	1.4	12.41	0.35	32.68	0.84	3.73	0.11	21.4	0.64	3.259	0.079	5	1.2	6.95	0.69	4.42	0.62	4.27	0.57	4.19	0.24	4.17	0.1
BTW6b_73	411.4	7.2	657	17	616	22	3.76	0.27	899	25	2247	58	279.1	8.2	1278	30	251.3	7.2	36.84	0.86	201.4	4.9	23.61	0.51	129.1	2.9	22.8	0.64	56.1	1.4	6.69	0.22	36.5	1	4.81	0.15	3.42	0.92	7.5	0.34	3.99	0.25	4.75	0.35	7.73	0.31	3.557	0.081
BTW6b_74	508	24	564	36	199	12	0.526	0.079	808	42	1760	110	158	11	487	23	62.9	3.4	31.6	2	43.6	2.8	4.8	0.3	26	1.7	5.63	0.34	17.12	0.86	2.71	0.15	19.83	0.93	4.15	0.23	2.35	0.81	66.8	4.1	10.17	0.55	8.7	0.49	39.6	3.1	57.6	3.9
BTW6b_75	468	18	343	12	988	51	1	0.1	259	12	905	44	148.3	6.9	850	41	214.8	9.6	45.3	2.1	192.2	8.6	24.72	0.99	149	6.3	30.1	1.3	86.7	3.2	12.69	0.62	84.7	4	14.57	0.73	2.33	0.68	17.91	0.68	4.24	0.14	4.74	0.27	14.41	0.82	14.8	0.83
BTW6b_76	243.8	8.9	391	11	661	18	3.2	0.19	478	18	1789	70	254	11	1202	49	255	10	28.4	1.1	197.8	6.8	23.44	0.73	133.4	5.4	23.99	0.84	60.6	2.1	7.31	0.26	40.6	1.5	5.44	0.21	1.53	0.69	65.3	2.1	8.1	0.36	5.73	0.32	33.1	1.3	70.4	2.2
BTW6b_77	476	11	466	12	1773	47	0.54	0.068	459	11	1848	53	313.6	9.7	1694	44	412	14	52.3	1.7	362.7	7.9	48.87	0.99	301.4	7.1	60.7	1.5	177.3	4.9	26.89	0.78	189.9	5.8	28.83	0.73	3.19	0.65	87.9	1.8	12.66	0.29	5.12	0.26	17.5	0.58	85.9	1.8
BTW6b_78	234.1	6.7	420	11	766	29	0.484	0.074	340	13	1369	65	215.7	7	1053	30	234.7	8.9	35.1	1.2	186.5	5.9	22.07	0.63	123.1	3.8	23.98	0.79	67.3	2.1	9.53	0.34	59.8	1.8	10.13	0.28	2.04	0.51	60.5	1.6	8.35	0.2	8.18	0.42	45.9	1.8	58.9	1.5
BTW6b_79	802	15	358	12	806	29	0.158	0.039	483	16	1053	33	131	5	640	20	153.4	4.9	39.2	1.1	157.1	4.5	19.34	0.52	114.9	3.7	24.12	0.8	68.4	2.4	9.09	0.19	56.8	1.6	9.91	0.31	2.51	0.76	32	1.3	6.63	0.25	4.36	0.18	7.76	0.49	29.3	1.6
BTW6b_80	406.2	4.8	501.1	5.1	549	13	640	480	153.7	2.6	449.4	6.7	72.1	1.1	420.1	5.7	128	2	64.2	1.3	135.3	2	16.7	0.29	94.8	1.9	18.32	0.4	47	1.1	5.78	0.17	33.8	1.1	5.76	0.22	3.4	0.78	12.77	0.71	4.51	0.16	4.67	0.23	10.62	0.41	10.22	0.73
BTW6b_81	691	24	415	9	1903	75	0.229	0.051	191.2	6.3	743	30	124.7	4.3	725	28	264.7	9	36.2	1.1	326	10	47.6	1.7	304	11	60.9	2.2	178.1	7	23.38	0.87	140.3	5.5	20.75	0.72	2.93	0.72	46.2	1.8	7.77	0.29	5.97	0.29	19.12	0.87	45.4	1.6
BTW6b_82	333.7	7	417.2	8.8	588	11	0.424	0.055	249.6	5.4	922	18	147.9	3.1	784	14	174.2	3.6	34.3	0.72	147.1	2.6	16.87	0.4	95.9	1.9	18.72	0.36	52.41	0.82	7.27	0.18	48.3	1.1	8.26	0.14	2.9	0.78	57.7	1.1	9.22	0.22	8.64	0.3	40.93	0.97	53.5	0.99
BTW6b_83	468	14	395	16	116.1	4.8	0.02	0.012	31.2	1.1	135.1	5	23.84	0.96	130.6	4.1	29.1	1	7.79	0.27	27.05	0.89	3.12	0.11	18.46	0.62	3.81	0.14	10.74	0.28	1.444	0.062	9.76	0.43	1.697	0.076	2.38	0.53	9.1	0.21	2.976	0.087	2.12	0.14	0.445	0.03	6.82	0.24
BTW6b_84	400	22	300	16	876	37	0.77	0.44	236.6	8.2	896	50	134.7	6.1	690	35	190.4	9.5	81.4	2.9	179.3	9.1	22.7	1.2	135.3	7.5	26.5	1.4	75.5	3.1	10.06	0.36	69.1	2.9	12.92	0.51	3.36	0.88	31.9	1.5	6.28	0.58	7.06	0.7	35.1	3.2	32.4	1.4
BTW6b_85	287.2	8.6	235.9	7	823	26	1.99	0.15	2003	71	4180	170	422	16	1559	55	227	7.6	54.3	1.5	176.6	5.4	20.68	0.58	125.2	3.8	25.81	0.64	75	2.5	10.58	0.33	72.5	2.7	13.5	0.41	2.58	0.65	181	5.2	22.97	0.64	39.8	1.9	287.4	7.6	184.3	5.4
BTW6b_86	297	11	498	19	473	23	0.418	0.075	257	12	979	46	152.2	7	769	37	162.7	6.3	23.9	1.2	131.8	5.7	14.96	0.56	83.7	3.7	16.17	0.67	45.1	1.7	6.03	0.24	38.1	1.8	6.29	0.27	2.51	0.83	39.8	2.2	6.53	0.24	6.48	0.32	32.2	2.1	40.9	2.8
BTW6b_87	302	11	617	26	395	16	0.142	0.033	537	26	1588	75	196.1	7.4	950	29	164.3	5	15.49	0.68	119.6	3.9	14.2	0.45	74.4	2.9	13.66	0.43	35.4	1.3	4.5	0.17	24.76	0.96	3.45	0.17	3.21	0.92	32	1	5.69	0.25	4.54	0.24	14.64	0.6	27.36	0.95
BTW6b_88	351	16	428	16	655	26	0.747	0.088	293	10	1109	45	180.1	7.5	913	32	199.4	6.6	40.9	1.5	155.4	4.8	19.29	0.56	109.1	3.4	20.95	0.82	60.5	1.3	8.43	0.3	54.9	1.8	9.22	0.33	3.02	0.8	48.6	1.9	7.25	0.24	8.15	0.49	43.8	1.3	45.8	1.7
BTW6b_89	583	17	194.5	5.4	1043	36	0.15	0.11	93.1	3.4	399	17	74.2	2.5	454	11	172.4	4.9	18.98	0.61	205.5	6.4	29.23	0.82	172.1	5.2	33.21	0.93	90.7	2.8	11.52	0.4	65.5	2	9.23	0.28	2.23	0.66	13.26	0.31	3.66	0.09	3.98	0.22	10.55	0.32	10.76	0.3
BTW6b_90	180.8	8.6	473	19	644	18	0.322	0.038	268	11	1046	41	176.7	8	928	32	219.8	8.6	33.4	1.1	188	5.5	23.18	0.83	135.2	4.3	24.51	0.72	63.2	2.2	7.8	0.26	46.5	1.7	6.52	0.19	2.03	0.62	16.81	0.62	3.027	0.089	2.97	0.16	14.04	0.66	22.98	0.69
BTW6b_91	243.4	6.5	269.5	7.6	1087	37	0.17	0.043	52.2	1.5	245	13	52.9	1.8	385	16	172	6	21.65	0.71	198.8	6	28.24	0.52	172.2	4.5	36.1	1	102.4	3.6	14.33	0.39	90.8	2.4	15.71	0.58	2.17	0.67	43.1	0.87	6.47	0.17	3.89	0.16	15.48	0.58	41.98	0.98
BTW6b_92	432	25	1690	110	199.3	9.9	9.49	0.64	331	21	1100	100	139	10	665	38	126.7	7	29	1.8	90.5	4	9.55	0.56	48.6	2.4	7.62	0.48	17.5	1.1	1.97	0.13	9.99	0.59	1.318	0.073	0.83	0.41	4.41	0.28	1.58	0.11	2.1	0.24	4.7	0.31	2.52	0.12
BTW6b_93	298	10	223.2	8.2	3720	180	2.24	0.16	541	26	2770	160	477	18	2790	120	710	24	123.6	4.8	677	20	98.1	3.9	628	22	126.3	5.3	363	13	53.2	1.8	363	14	54.6	1.9	3.66	0.86	307.1	9.9	38	1.3	38.2	1.7	257	13	320	10
BTW6b_94	392	12	330.4	8.7	1173	31	0.027	0.017	76.4	2.3	310	11	58.4	2.1	344	10	156.4	4.4	20.14	0.68	225.7	6.2	45.8	1.4	305.7	8.9	48.4	1.5	103.7	3.7	11.71	0.35	56.9	2	6.96	0.18	13.4	1.3	19.24	0.46	13.5	0.36	13.05	0.61	1.709	0.085	20.84	0.72
BTW6b_95	346	7.3	535	15	728	13	12.56	0.41	368.5	8.8	1049	26	147.1	3.5	768	17	189.6	4.3	35.17	0.76	185.9	2.7	24.89	0.51	146.7	3.2	26.49	0.56	64.1	1.3	7.58	0.21	39.56	0.96	5.07	0.13	0.74	0.35	1.378	0.063	0.672	0.044	0.893	0.086	4	0.19	0.952	0.024
BTW6b_96	230.2	6.1	596	19	225.7	6.6	0.152	0.041	148.3	5.3	441	23	56.4	2.4	273	9.4	58.9	2.1	10.09	0.29	50.3	1.2	5.85	0.16	34.67	0.89	7.05	0.21	20.97	0.69	3.13	0.12	22.33	0.59	4.13	0.13	1.25	0.58	14.51	0.33	3.197	0.096	4.04	0.19	17.12	0.67	12.68	0.43
BTW6b_97	427.1	7.6	167.3	4.7	1586	38	0.79	0.14	895	24	3483	98	518.9	9.2	2367	54	429	10	33.62	0.77	332	8	43.1	1	258.4	6.6	52	1.1	145.3	3.5	21.06	0.48	134.5	2.3	20.51	0.38	2.99	0.73	90.2	2.1	12.58	0.31	4.87	0.37	11.73	0.38	91.9	1.7
BTW6b_98	254.7	8.2	401	11	120.9	3.4	0.088	0.029	48.7	2.2	205.1	9.3	34.2	1.2	181.8	7.3	40.9	1.5	6.82	0.26	36.3	1.3	4.2	0.14	22.17	0.79	4.05	0.12	10.47	0.39	1.36	0.059	8.35	0.31	1.481	0.049	2.69	0.69	7.45	0.18	3.235	0.099	2.83	0.16	4.41	0.21	5.27	0.13
BTW6b_99	390.2	9.3	299.1	6.9	65.9	3.9	0.58	0.18	70	2.6	227.8	7.1	29.91	0.99	147.6	4.8	23	1.2	22.28	0.69	18.7	1	1.93	0.17	10.24	0.87	2.07	0.14	5.85	0.36	0.811	0.043	5.56	0.24	1.251	0.051	0.88	0.41	10.46	0.27	2.28	0.07	1.65	0.1	2.88	0.19	9.57	0.28
BTW6b_100	239.7	4.1	483	12	421	15	0.639	0.078	233	10	875	39	132.1	5.1	651	22	131.2	5.3	32.18	0.95	103.5	2.6	12.2	0.32	68.3	2	13.58	0.43	37.5	1.1	5.25	0.13	34.3	1.2	6.1	0.19	3.8	1.1	79.7	2.5	10.99	0.36	6.24	0.32	28	1.5	77.9	2.8
BTW6b_101	346.3	9	470	14	368	17	0.467	0.062	342	11	1173	47	165.1	6.2	803	26	144.4	4.4	24.8	1.1	115.9	4.5	12.35	0.53	67	3.2	12.15	0.56	31.4	1.2	3.86	0.16	23.06	0.81	3.93	0.17	2.59	0.75	34.5	1.1	6.04	0.16	4.99	0.24	20.5	1.1	33.1	1.2
BTW6b_102	335.8	9.7	566	17	690	23	13.81	0.59	361	14	1044	41	146.6	3.8	747	27	178.5	6	39.9	1.1	172.7	4.1	22.75	0.52	134	4	24.44	0.8	60.9	2.3	7.13	0.2	39.2	1	4.88	0.12	1.09	0.48	1.489	0.051	0.735	0.024	0.961	0.077	3.13	0.12	1.054	0.027
BTW6b_103	402.5	6.1	396.6	9	333	11	0.53	0.11	236.9	7.6	756	19	94.9	3	400	14	70.1	2.2	17.63	0.53	62.9	2	7.69	0.3	45.3	1.6	9.64	0.36	28.77	0.92	4.31	0.17	31.49	0.99	6.11	0.2	2.21	0.59	39.9	1.3	6.75	0.24	5.4	0.23	22.7	0.74	37.6	1
BTW6b_104	483	12	325.2	7.1	1388	43	0.276	0.046	89.6	5.2	429	23	89.7	3.5	613	20	203.1	7.2	28.89	0.8	222.3	6.1	29.12	0.8	196.9	5.9	42.4	1.2	129	3.9	19.7	0.48	136.2	3.3	26.26	0.68	2.81	0.77	24.5	1.2	4.68	0.18	4.91	0.21	20.21	0.83	24.34	0.92
BTW6b_105	339	10	307	10	1382	42	0.547	0.053	94.2	3.7	632	26	137.2	5.2	890	33	268.9	8.9	35.87	0.93	260.1	9.8	36.7	1.2	226.5	6.1	46.8	1.6	135.2	4.9	19.51	0.64	127.7	4.8	19.56	0.67	3.6	1.1	29.6	1.1	5.61	0.22	3.51	0.22	3.74	0.27	40.8	1.8
BTW6b_106	286	7.6	457	13	1048	32	19	0.49	508	20	1364	41	201.6	5.1	984	30	238.1	5.9	36.2	1	223.9	5.4	31.12	0.57	190.3	4.8	35.6	1.1	89.9	2.4	11.13	0.3	61.4	1.3	7.88	0.2	0.7	0.35	1.875	0.06	0.786	0.04	1.16	0.1	5.99	0.24	1.522	0.038
BTW6b_107	341.8	6.3	1111	23	147.5	4.2	0.919	0.081	1355	30	2275	57	198.6	3.6	745	15	90.5	1.5	15.94	0.37	58.8	1.2	5.56	0.14	28.75	0.77	5.19	0.12	13.56	0.27	1.728	0.061	10.31	0.18	1.727	0.042	1.9	0.51	16.02	0.46	3.96	0.13	4.56	0.17	41.9	1.5	56.6	1.7
BTW6b_108	386	13	224.3	7.2	1231	36	0.48	0.046	212.1	5.6	1099	43	202.4	5.9	1132	36	293.4	9.5	40.7	1.2	277.3	6.9	37.9	1.1	228.2	6.8	44.1	1.3	113.6	3.5	15.32	0.51	92.7	3.2	13.28	0.42	2.33	0.72	40.1	1.4	6.61	0.2	3.46	0.22	9.49	0.5	40.6	1.2
BTW6b_109	245	10	611	28	700	22	3.1	0.17	990	140	2530	230	357	28	1615	93	301	13	32.19	0.99	229.7	7.9	26.78	0.92	146	5	25.38	0.62	59.7	1.9	7.1	0.23	37.9	1.4	4.91	0.17	1.64	0.52	5.61	0.2	1.815	0.088	2.67	0.19	11.22	0.9	6.21	0.18
BTW6b_110	350	10	163.2	4.4	1709	49	0.586	0.075	763	30	3040	100	478	18	2351	94	455	13	70.6	2	365	12	46	1.5	272.7	8.6	54	1.7	152.2	4.9	20.94	0.65	133.9	3.9	23.1	0.71	4.45	0.91	48.9	1.9	9.45	0.31	16.35	0.74	89.2	3.5	47.8	1.8
BTW6b_111	324.9	9.5	403	13	1078	35	0.701	0.078	304.5	9.3	1479	62	254.6	6.9	1396	39	322.7	9.7	47.2	1.5	266.8	8.8	31.4	1.1	181.2	5.7	34.88	0.97	98.3	3	13.31	0.43	86.1	2.8	14.52	0.43	2.45	0.71	75.6	2.2	10.58	0.32	12.8	0.61	73.6	2.5	73.2	2.2
BTW6b_112	440	11	362	10	218.9	6.2	0.143	0.026	1014	32	1599	55	152.5	4.7	573	15	86.9	2.7	12	0.37	69.2	2	7.15	0.21	40.2	1.2	7.66	0.21	19.83	0.58	2.523	0.084	15.76	0.55	2.795	0.066	3.05	0.65	16.02	0.36	5	0.14	6.08	0.27	17.4	0.64	12.17	0.28
BTW6b_113	192.4	6.6	462	10	969	23	15.55	0.44	534	19	1413	56	190.6	5.1	988	33	214.4	6.4	41.7	1	216	5.4	29.91	0.74	179.7	4.8	33.42	0.89	85.3	2.7	10.19	0.24	57.9	1.7	7.38	0.18	1.38	0.55	2.027	0.077	1.124	0.036	1.58	0.11	6.47	0.38	1.311	0.051
BTW6b_114	277.1	6.8	336	12	249.1	8.4	0.071	0.023	5.9	0.43	48.3	1.6	14.73	0.64	131.4	6.1	70.2	3.5	17.03	0.78	81.8	2.9	9.93	0.4	52.4	1.8	8.7	0.37	20.91	0.65	2.26	0.1	11.62	0.58	1.483	0.072	1.52	0.62	9.43	0.33	1.865	0.059	1.163	0.078	1.151	0.09	9.67	0.41
BTW6b_115	301.4	8.7	406	12	746	24	0.165	0.036	140.7	5.8	519	23	76.8	3	421	17	101.3	3.8	13.42	0.33	97.7	3.3	13.55	0.38	89.6	3.1	20.11	0.61	68.4	2.2	11.64	0.35	88	2.6	16.07	0.49	3.21	0.84	32.6	1.2	5.77	0.18	6.41	0.4	29.3	1.7	32.3	1
BTW6b_116	262.7	6	250.8	5.3	1110	25	1.4	0.2	992	22	2413	62	257.6	6.1	1124	32	214.6	3.4	33.03	0.73	193.9	3.9	25.44	0.42	159.7	2.7	33.59	0.82	100	1.8	15.1	0.38	104.5	2.1	18.61	0.4	3	1	157.3	2.8	20.3	0.39	27.35	0.94	183	4.6	156.5	2.5
BTW6b_117	381.8	9.9	682	22	153.1	5.8	5.05	0.65	534	16	1239	48	132.4	4	515	16	74.4	3.1	14.21	0.51	53	1.6	5.97	0.19	31.6	1	5.56	0.23	13.54	0.56	1.675	0.074	9.7	0.36	1.499	0.056	1.56	0.57	56.2	2.1	7.47	0.23	11.42	0.53	70.5	2.6	54.4	2
BTW6b_118	306.9	6.8	342	11	840	28	90	100	596	25	1813	79	246.6	8.3	1096	45	201	6.9	29.35	0.96	165.1	5.2	20.85	0.8	130.9	4.3	26.52	0.89	78.6	2.9	11.44	0.43	76.8	2.8	12.06	0.36	1.08	0.41	72.2	2.7	9.01	0.27	5.82	0.33	36.8	1.5	82.4	2.8
Sample 4		Location: Bunatrahir West			Grid Coordinates: 54°18'31.6''N, -9°23'35.6''W
	Mn55	2σ	Sr88	2σ	Y89	2σ	Zr90	2σ	La139	2σ	Ce140	2σ	Pr141	2σ	Nd146	2σ	Sm147	2σ	Eu153	2σ	Gd157	2σ	Tb159	2σ	Dy163	2σ	Ho165	2σ	Er166	2σ	Tm169	2σ	Yb172	2σ	Lu175	2σ	Pb204	2σ	Pb206	2σ	Pb207	2σ	Pb208	2σ	Th232	2σ	U238	2σ
BTW08_0	248.3	9	350	10	705	33	0.226	0.041	151.6	5.2	718	39	124.1	5.4	701	28	167	5.7	44.2	1.6	143.9	4.8	19	0.69	119.6	4.9	23.62	0.95	68.3	2.3	10.08	0.44	71.1	2.8	11.09	0.43	2.71	0.79	25.11	0.66	5.25	0.15	3.55	0.19	6.82	0.4	25.9	1.1
BTW08_1	788	28	464	19	268	13	1.13	0.1	308	14	832	32	117.6	5.9	625	25	135.9	4.9	22	0.99	107.3	4.5	11.27	0.47	58.2	2	10.25	0.43	23.68	0.97	2.69	0.11	13.5	0.54	1.939	0.053	2.55	0.84	5.84	0.19	2.8	0.1	2.8	0.15	4.25	0.2	3.36	0.11
BTW08_2	286	13	601	29	438	16	0.139	0.03	37.9	2.6	262	16	61.8	3.1	409	19	108.4	5	11.96	0.53	98.2	3.5	11.7	0.4	70.3	2.2	14.4	0.58	41.5	1.8	5.98	0.27	42.9	2.3	7.46	0.3	2.63	0.74	35.5	1.7	6.13	0.25	4.48	0.22	14.86	0.77	42.7	1.9
BTW08_3	238	10	300	15	14.37	0.58	0.019	0.01	0.051	0.015	0.264	0.042	0.05	0.012	0.509	0.067	0.495	0.095	0.238	0.029	1.14	0.11	0.203	0.011	1.681	0.092	0.508	0.038	1.814	0.098	0.304	0.024	2.43	0.13	0.458	0.032	1.94	0.72	1.677	0.074	1.752	0.074	1.69	0.14	0.0041	0.0035	0.0701	0.0036
BTW08_4	316	12	561	26	105.6	4.8	1.7	0.12	244	10	557	28	60.2	2.9	262	12	40.7	1.7	8.47	0.35	32	1.4	3.25	0.11	18.38	0.59	3.45	0.16	9.72	0.41	1.256	0.066	8.26	0.42	1.504	0.068	3.44	0.88	10.44	0.38	3.87	0.13	3.94	0.2	6	0.37	7.77	0.26
BTW08_5	330	12	582	33	553	19	11.35	0.54	259	10	748	31	104.7	3.9	592	22	136.6	5.3	35.6	1.3	141.7	5.5	17.84	0.59	103.1	4	19.62	0.88	47	1.7	5.34	0.22	29.9	0.95	3.9	0.15	1.45	0.52	1.37	0.12	0.908	0.097	1.14	0.13	3.68	0.23	0.679	0.025
BTW08_6	314.4	6.6	478.2	9.2	322	12	0.3	0.29	19.3	1.2	125.4	4.1	34.5	1	275.5	6	112	3.4	29.09	0.96	119.6	4.9	15.05	0.71	78.3	3.7	12.64	0.56	26.7	1.1	2.9	0.1	15.07	0.47	1.979	0.066	1.31	0.56	5.68	0.16	1.689	0.067	1.63	0.13	13.4	2	4.99	0.12
BTW08_7	199.4	5.3	254.9	8.3	933	32	0.848	0.065	161.2	3.6	803	23	146.6	3.8	848	25	218.6	4.8	29.72	0.87	207.7	6	28.38	0.71	165.9	4.2	32.8	0.77	90.3	1.9	11.63	0.3	72.7	1.8	10.61	0.32	1.32	0.47	38.37	0.86	5.66	0.18	2.22	0.16	6.39	0.29	39.9	1
BTW08_8	728	19	247.1	7.3	372	11	0.436	0.05	85.8	3.4	274.4	6.6	39.9	1.3	204.3	8.2	46.2	1.3	13.39	0.28	49.1	1.6	7.11	0.21	49	1.7	11.59	0.39	38.92	0.99	6.02	0.16	41.6	1.2	7.8	0.21	2.6	0.79	12.05	0.26	4.14	0.26	3.72	0.24	5.49	0.21	34.98	0.95
BTW08_9	646	27	208.7	8.6	403	18	0.248	0.042	1510	70	2840	130	275	12	926	37	143.8	6.4	28.9	1.6	120.5	5.7	15.03	0.67	83.5	4	14.37	0.64	35.1	1.7	4.21	0.17	24.4	1	4.05	0.17	4.33	0.83	14.86	0.45	5.42	0.19	8.99	0.45	56.2	2.5	10.64	0.31
BTW08_10	454	17	353	19	348	15	0.161	0.031	10.5	0.82	60.4	4	15.99	0.99	143.4	7.5	67	2.8	19.12	0.99	86.5	4.1	11.91	0.57	74.7	4	13.75	0.57	35.7	1.5	4.42	0.21	26.5	1.2	3.93	0.15	2.02	0.66	6.83	0.24	2.043	0.081	1.66	0.12	2.92	0.42	5.62	0.21
BTW08_11	281	12	273	10	663	30	0.073	0.014	364	13	1215	53	176.7	8.3	804	37	150.5	5.4	11.24	0.36	127.2	4.8	16.8	0.58	103.6	4.6	21.26	0.88	59.4	2.1	7.88	0.36	49.1	1.7	7.49	0.29	2.92	0.84	13.27	0.39	4.21	0.15	4.73	0.31	12.39	0.49	10.37	0.32
BTW08_12	336	11	411	18	1680	73	1.073	0.069	2050	100	5040	210	632	32	2750	130	498	21	87.6	3.3	405	16	49.6	1.5	287.5	9.3	54	1.8	158.9	6.9	20.47	0.93	135.2	5	21.56	0.91	3.3	0.9	94.6	4.5	13.66	0.61	28.4	1.4	173.5	7.6	91.6	3.3
BTW08_13	876	34	208.8	9.2	843	39	2.43	0.14	1138	45	2308	93	252	8.7	1045	46	224.9	9.2	42.1	1.7	216.1	8.9	27.9	1.4	153	7.8	29	1.4	81	3.7	10.67	0.43	62.6	2.5	10.99	0.44	5.8	1.3	73.1	3.2	12.74	0.57	26.5	1.5	183.5	8.7	72.7	2.8
BTW08_14	330	15	189.6	7.8	1726	58	2.64	0.4	658	29	2180	100	339	17	1777	87	409	14	98.9	3.2	383	13	51.4	1.6	308	10	59.8	2.2	173.1	5.8	24.23	0.98	164.3	6.2	25.26	0.98	2.43	0.82	134	4.6	17.68	0.6	17.13	0.72	140.3	5.7	135.8	4.3
BTW08_15	349	13	480	17	24.9	1.1	0.041	0.016	40.1	1.6	91.2	3.5	10.31	0.51	44	1.6	6.16	0.33	2.87	0.12	5.39	0.27	0.583	0.026	3.25	0.16	0.708	0.034	2.14	0.13	0.289	0.018	1.96	0.12	0.418	0.024	3	0.82	6.23	0.16	3.083	0.09	3.54	0.22	5.49	0.19	5.54	0.14
BTW08_16	31.6	1.8	469	21	475	28	1.78	0.26	69.9	3.2	344	14	72.1	3.3	493	28	220	14	51.9	2.6	265	16	34	2.1	162	10	22.4	1.3	38.6	2.3	2.7	0.15	8.46	0.36	0.712	0.039	1.52	0.63	3.1	0.55	2.29	0.45	4.58	0.4	92.2	6.2	0.77	0.15
BTW08_17	536	19	583	23	430	15	0.469	0.046	33	1.3	202.9	8.9	48.1	2.1	343	13	110.8	4.1	22.42	0.91	116.4	3.1	14.66	0.46	84.6	2.5	15.97	0.49	39.5	1.2	4.86	0.17	28.25	0.71	3.95	0.11	3.25	0.93	50.1	1.8	8.52	0.24	10.65	0.51	57.1	2	49.6	1.5
BTW08_18	200	7.6	520	22	180.3	8.9	0.309	0.071	47.6	2.6	170.9	9.6	29	1.9	170.9	9.8	66.2	4	16.53	0.79	83.6	4.9	11.13	0.6	55.5	2.5	8.34	0.42	15.86	0.87	1.264	0.07	5	0.37	0.595	0.031	3.17	0.85	3.58	0.15	2.95	0.13	3.79	0.25	26.6	1.9	2.271	0.08
BTW08_19	356	19	198.7	8.9	1491	58	0.42	0.046	403	18	1672	74	317	18	1645	77	392	20	31.2	1.3	334	10	44.7	1.5	268	10	50.1	1.9	138	6.5	17.52	0.67	103.5	4	14.71	0.59	2.43	0.59	31.1	1.3	5.61	0.22	3.31	0.22	7.36	0.84	34.8	1.3
BTW08_20	63	4.8	1920	110	534	18	0.221	0.041	94.5	5.1	452	19	85.8	3.6	568	22	233.4	9.2	47.1	1.9	286	11	37.5	1.3	184.4	6.4	27.74	0.97	52	2	4.33	0.13	19.05	0.65	2.15	0.11	0.63	0.37	11.06	0.98	1.86	0.14	1.6	0.15	22.5	1.1	10.3	1
BTW08_21	69.6	9.2	1320	120	847	72	0.184	0.052	62.5	3.5	341	22	78.1	3	577	27	270	12	53.9	1.8	337	10	46.2	2	241.1	8.6	38.6	2.4	78.5	6.4	7.9	1	39.1	6.6	4.97	0.93	1.8	0.56	6.7	1.9	2.49	0.63	3.6	0.7	45.4	4.9	19.2	5.7
BTW08_22	291	9.8	655	21	564	25	0.818	0.065	443	15	1527	69	217	9.3	1105	31	222.7	8.3	16.48	0.57	175.3	6.4	20.5	0.79	111.7	3.2	19.67	0.66	50.1	1.8	6.19	0.22	37.2	1.5	4.7	0.16	1.83	0.68	42.9	1.1	6.44	0.19	5.56	0.25	27.8	1.3	41	1.2
BTW08_23	1443	43	152.9	6.1	2511	79	0.222	0.043	105.3	5.2	776	41	178	6.2	1175	33	488	18	15.42	0.62	526	17	83	3	527	17	95.7	3.2	242.3	8.3	29.4	1.1	153.6	5.1	18.17	0.51	3.39	0.97	10	0.37	3.62	0.18	2.89	0.22	1.54	0.71	7.96	0.23
BTW08_24	481	15	355	14	1564	49	0.959	0.093	623	24	2142	75	362	13	1794	67	375	13	94.2	3	321.3	6.9	43.1	1.4	270.9	8.2	54.6	2.1	160.3	5.3	23.4	0.81	160	4.6	25.95	0.89	3.52	0.94	93.4	2.9	12.98	0.4	9.48	0.45	46.2	1.8	90.7	2.9
BTW08_25	752	36	617	23	479	28	0.309	0.039	93.9	5.5	610	32	124.8	6.5	749	33	194.7	7.2	34	1.5	152.5	7.1	17.61	0.79	92.9	5	16.78	0.83	40.8	1.9	4.7	0.25	25.18	0.91	3.42	0.12	1.71	0.62	10.96	0.38	2.93	0.12	3.59	0.18	14.3	1.3	10.67	0.52
BTW08_26	479	21	815	27	232	10	0.196	0.032	24.5	1.4	182	12	46.2	2.6	376	21	128.1	5.7	31.3	1.7	101.5	3.9	10.86	0.48	51.2	2.1	8.46	0.39	19.96	0.91	2.218	0.098	12.38	0.61	1.718	0.058	1.16	0.57	8.03	0.24	2.4	0.093	1.67	0.11	0.328	0.041	6.57	0.22
BTW08_27	536	23	271.7	8.2	423	15	0.039	0.015	5.92	0.6	27.8	3.4	5.22	0.62	35.7	4.1	16.3	1.7	5.62	0.42	31.3	2	6.16	0.29	54.1	2.1	14.75	0.46	52.8	2	8.37	0.36	58	1.7	8.78	0.32	1.99	0.57	3.4	0.1	2.491	0.082	2.27	0.15	3.36	0.85	0.887	0.029
BTW08_28	697	33	243	12	1487	73	0.68	0.44	13.91	0.78	50.8	2.8	8.65	0.5	55.4	2.2	27.3	1.3	15.71	0.63	66.8	2.9	18.26	0.85	184.6	6.3	50.8	1.9	186.5	7.4	27.4	1.5	183.1	6.9	28.1	1	2.52	0.83	7.46	0.31	3.03	0.14	2.69	0.21	0.64	0.046	18.8	0.66
BTW08_29	51.8	1.4	1182	29	602.4	9.9	0.124	0.028	93.8	2	470.1	8.5	96.1	2	687	10	293	4.9	57.1	1	352.8	6.8	44.81	0.88	220.5	4.5	31.42	0.7	54.5	1	4.19	0.11	14.98	0.38	1.528	0.045	1.82	0.61	2.3	0.17	1.32	0.13	2.21	0.19	30.73	0.79	0.981	0.048
BTW08_30	352	14	166.3	6.7	1057	46	0.213	0.034	513	19	1767	82	296	15	1551	73	336	13	26.65	0.92	285.5	9.7	35.5	1.3	213	8.2	38.3	1.4	100	4.4	11.96	0.5	69.9	3.1	10.59	0.41	4.5	1.2	39	1.6	9.55	0.37	11.89	0.52	45	2.4	33.2	1.3
BTW08_31	372	12	570	26	655	36	0.494	0.071	467	21	1647	72	244.1	9.3	1163	42	259	13	33.9	1.9	221	11	27.4	1.6	145.1	7.3	24.6	1.1	56.1	1.9	6.75	0.21	38	1.5	5.19	0.15	4.3	1.1	28.06	0.91	6.67	0.49	6.83	0.62	38.5	2.8	22.68	0.61
BTW08_32	199.8	9.2	433	24	348	13	0.99	0.2	46.8	2.2	219	10	45.6	2.2	305	14	130.1	6.5	28.7	1.6	161.8	8.6	20.8	1	107.8	5.2	16.3	0.91	31.3	1.8	2.62	0.12	10.62	0.59	1.397	0.063	2.97	0.87	7.25	0.26	2.62	0.096	3.63	0.21	49.8	3.1	9.38	0.32
BTW08_33	211.5	7.4	683	24	137.5	6.8	0.108	0.029	43.6	1.7	169.7	8.7	25.4	1.3	134.6	7.1	27.57	0.99	10.46	0.5	26.14	0.96	3.13	0.13	18.59	0.79	4.1	0.19	11.95	0.57	1.621	0.088	11.29	0.52	2.364	0.091	2.24	0.74	16.9	0.86	3.85	0.2	3.15	0.29	7.93	0.56	19.64	0.78
BTW08_34	355	13	160.7	5.3	1947	91	0.86	0.065	443	26	1595	84	264	16	1389	73	385	17	70.7	2.6	388	16	52.5	2.1	324	15	64.6	3	185.1	9.5	24.7	1.3	153.6	6.7	24.06	0.95	2.66	0.89	104	5	14.02	0.57	17	1.1	104	6.9	108.2	3.8
BTW08_35	374	10	525	25	716	26	23	26	218.1	8.6	1021	36	167.8	7	871	33	192.3	5.1	25.3	0.78	169	5.5	22.26	0.74	130.8	4.3	25.07	0.6	68.8	2.3	9.67	0.25	60.7	2.3	8.9	0.28	2.27	0.59	58.3	1.6	8.8	0.27	7.09	0.34	35.9	2.1	59.2	1.9
BTW08_36	298	13	339	12	44.3	2	0.173	0.025	4.29	0.51	12.8	1.4	2.35	0.23	12.2	1.2	4.13	0.36	0.953	0.067	4.88	0.26	0.798	0.047	6.32	0.39	1.672	0.075	6.36	0.29	1.056	0.06	7.78	0.36	1.324	0.042	2.5	0.74	7.32	0.24	2.78	0.1	2.12	0.14	1.92	0.27	5.22	0.18
BTW08_37	26	2.5	2007	97	626	30	0.11	0.031	104	14	466	44	85.9	4.4	597	33	282	14	54.4	2.3	347	15	45.5	1.9	228.5	8.8	33.4	1.5	59.7	2.2	4.68	0.17	15.64	0.58	1.532	0.07	0.91	0.44	1.104	0.076	0.695	0.054	1.57	0.13	34.3	2.9	1.5	0.43
BTW08_38	202.9	6.1	283	12	1411	52	1.052	0.079	984	33	2900	120	397	15	1860	85	365	13	36.6	1.1	308	10	40.6	1.2	247.3	9.1	49.2	1.5	136.7	4.3	19.3	0.73	122.2	3.7	17.47	0.5	3.4	1	48.7	1.5	8.52	0.26	6.81	0.29	29	1.4	50.5	1.5
BTW08_39	514	19	277	12	538	20	0.078	0.031	24.4	1.5	112.9	7.7	23.2	1.7	158	12	78.1	5.3	20.4	1.2	118.7	7.6	17.41	0.72	104.8	3.6	19.75	0.68	47.7	1.5	5.6	0.21	30	1	4.14	0.13	1.11	0.63	5.55	0.16	2.248	0.079	2.32	0.11	19.6	1	4.11	0.14
BTW08_40	213.9	7.9	251.4	7.1	1562	67	1.96	0.13	1330	46	3710	130	517	21	2437	97	448	17	47.6	1.4	359	11	46.4	1.6	281.5	7.1	53.1	1.6	145.8	4	19.35	0.64	117.5	3.7	16.91	0.43	2.23	0.83	30.11	0.83	5	0.16	4.58	0.23	23.1	1.1	31.06	0.7
BTW08_41	373	13	1205	42	439	15	0.589	0.057	588	22	1667	79	217	12	1093	45	220.4	7.3	27.25	0.88	175.9	4.9	19.86	0.62	99.5	3.1	16.9	0.68	37.9	1	4.13	0.17	21.75	0.73	2.91	0.11	2.12	0.67	51.7	1.5	7.79	0.22	11.53	0.62	69.8	1.9	47.8	1.1
BTW08_42	141.2	6.8	337	16	330	15	0.0079	0.0061	101.7	5.3	391	19	68.1	3.5	413	24	178	6.6	25.3	1.2	228.1	9.3	32.8	1.3	130.8	7.2	11.2	0.59	10.22	0.47	0.378	0.027	0.743	0.092	0.0545	0.0084	10.1	1.6	16.92	0.56	9.62	0.38	9.29	0.49	0.54	0.13	27.48	0.88
BTW08_43	296	12	389	18	1149	51	27.4	1.2	670	31	1800	87	243	12	1178	48	274	14	40.1	1.8	259.6	9.2	36.7	1.4	221.8	7.5	39.7	1.4	104.7	5	13.01	0.5	72.4	2.8	8.95	0.37	2.94	0.73	5.57	0.18	2.68	0.13	4.01	0.25	21.8	1.1	4.69	0.25
BTW08_44	42.9	8.8	1101	34	801	45	0.84	0.11	96	11	553	49	116.8	8.5	814	41	336.9	6.6	63.8	1.5	390.4	8.8	50.4	1.3	251.8	6.7	37.3	1.2	69.9	4	5.98	0.68	25.9	4.1	2.92	0.59	0.51	0.38	5.2	1.3	1.42	0.14	2.56	0.24	54.5	5.3	5.7	1.7
BTW08_45	381	13	250.8	9.1	292	15	0.055	0.015	61.8	3.6	270	13	53.5	2.7	345	17	99.2	4.5	24.9	1	85.9	3.2	10.68	0.49	57.5	2.8	10.44	0.51	26.2	1.5	3.4	0.18	21.1	1	2.91	0.16	0.94	0.54	19.5	1.3	2.96	0.16	1.118	0.098	2.36	0.33	20.3	1.1
BTW08_46	20.3	1.1	1708	51	408	17	0.046	0.018	112.3	5.8	480	21	83.9	4	538	29	209.7	8.3	38.3	1.5	245.5	9	31.7	1.3	153.2	7.1	22.64	0.8	41.1	1.8	3.41	0.17	12.35	0.61	1.183	0.059	0.16	0.19	0.91	0.11	0.434	0.071	1.28	0.14	31.2	2	0.528	0.033
BTW08_47	16.38	0.89	2760	150	394	19	0.037	0.017	84.8	4.7	332	20	66.3	3.5	434	25	173.9	9	35.8	1.4	211.1	8.1	28.8	1.3	147.1	6.2	21.3	1	38.9	2.1	3.44	0.2	12.69	0.54	1.183	0.059	-6.97e-05	3.1e-06	0.171	0.022	0.158	0.022	0.441	0.052	9.29	0.46	0.0398	0.0032
BTW08_48	398	14	334	15	725	34	0.077	0.017	151.7	6.8	551	31	90.7	3.7	519	28	181	11	43	3.1	222	13	28.5	1.8	153.3	7	26.6	1.5	63.3	3.1	7.71	0.34	48	1.9	8.35	0.27	2.22	0.84	14.93	0.58	4.18	0.27	5.75	0.45	66.8	4.9	12.61	0.41
BTW08_49	691	25	579	22	510	22	0.554	0.06	290	11	1162	48	181.3	7.6	952	41	197.4	7.8	23.83	0.9	157.4	6.2	17.09	0.62	88.2	3.1	16.89	0.58	44.4	1.6	5.26	0.19	28.5	1	4.27	0.15	2.18	0.82	27.7	0.89	4.89	0.2	6.25	0.31	34.6	1.7	28.6	1
BTW08_50	419	14	886	38	527	16	0.202	0.029	691	28	2320	100	333	15	1522	62	277.4	8.8	20.64	0.88	186.9	6.6	21	1	104.8	3.9	18.72	0.66	48	1.8	6.3	0.22	38.2	1.7	5.47	0.17	2.98	0.9	52.5	1.8	8.66	0.34	5.19	0.32	20.2	1.1	47.9	1.5
BTW08_51	163.4	9	804	36	503	25	0.792	0.096	136	7.3	599	26	108.1	4.6	687	28	260	11	55.1	2.7	276	13	34.7	1.6	158.8	8.5	21.9	1.1	37	1.6	2.91	0.13	10.7	0.39	1.146	0.051	0.87	0.5	11.65	0.77	2.76	0.22	4.45	0.29	45.1	1.8	10.2	0.49
BTW08_52	385	17	285	11	93.9	4.4	0.72	0.32	15.96	0.71	55.6	2.7	9.77	0.44	56.2	2.1	21.8	1.2	8.96	0.37	26.1	1.1	3.15	0.13	17.22	0.57	3.29	0.13	8.1	0.34	0.912	0.046	4.98	0.26	0.85	0.036	1.76	0.56	5.78	0.37	3.26	0.23	3.05	0.34	1.03	0.13	2.8	0.11
BTW08_53	679	23	330	12	300	14	0.373	0.044	55.9	2.3	174	7.4	28.6	1.4	161.1	8.6	40.9	1.7	15.15	0.55	47.4	1.6	6.6	0.28	41.9	1.6	9.35	0.34	29	1.3	4.21	0.2	31.4	1.2	6.17	0.25	2.97	0.72	7.87	0.18	3.63	0.1	3.44	0.22	1.94	0.13	18.4	0.81
BTW08_54	232.7	3.4	317.2	5.3	2133	27	9.69	0.23	973	12	3715	55	580.3	9.2	2813	46	543.9	8.7	130.1	1.7	451.7	7	60.02	0.84	370.4	5.7	75.3	1.3	220.2	3.1	32.72	0.51	224.7	3.3	35.65	0.55	4.2	1.1	150.4	2.6	20.03	0.42	33.29	0.8	231.7	4.1	155	2.4
BTW08_55	327	10	1334	47	302	15	0.82	0.14	387	14	1333	60	172	6.3	754	30	143.6	5.3	33	1.1	116.6	5.1	14.61	0.5	76.7	3.2	12.33	0.55	26.8	1.1	2.82	0.13	15.26	0.56	2.033	0.07	5.4	1.2	15.06	0.61	5.81	0.3	7.05	0.44	55.1	2.3	40.4	1
BTW08_56	865	37	143.9	4.8	664	28	1.06	0.1	2930	110	4440	180	392	18	1366	63	209.3	7.2	29.9	1.1	175.7	6.9	20.39	0.86	117.8	4.7	22.77	0.81	63.6	2.5	7.65	0.27	46.8	1.8	7.83	0.32	3.12	0.99	9.58	0.32	4.09	0.15	4.73	0.24	28.6	2	24.6	1.2
BTW08_57	556	16	244.5	7.9	1019	33	2.15	0.1	729	30	2249	74	322	15	1428	51	266.1	9.9	105.7	3.8	204.2	5.3	26.69	0.77	161.8	5.2	33.1	1.1	100.6	3	15.36	0.5	109.5	3.6	17.88	0.52	2.52	0.83	119.7	3.4	15.11	0.44	9.32	0.39	54.7	2.2	129.1	3.9
BTW08_58	169.3	2.2	357.7	4.4	1096	31	5.3	1.7	418.9	7.2	1810	36	311.4	8.7	1593	38	363.1	7.6	41.5	1.1	307.1	7.6	40	1.1	226.5	6	39.8	1.3	101.2	2.9	13.14	0.44	77.8	2.3	10.67	0.27	3.83	0.99	33.32	0.88	7.03	0.22	6.4	0.29	53.7	2.8	35.8	1.3
BTW08_59	351	16	196.2	6.8	1264	43	0.059	0.017	278	14	1193	58	195.5	8.8	1034	42	255	10	17.29	0.55	227.8	9.2	32.68	0.97	203	5.7	40.8	1.3	114.4	4.7	15.61	0.48	97.7	3.4	14.17	0.49	2.74	0.84	15.3	0.83	4.29	0.2	4.85	0.34	14.86	0.93	12.46	0.62
BTW08_60	113.9	4	697	25	341	14	2.55	0.18	259	12	903	37	127.3	5.7	652	31	144.9	8.7	26.2	1.2	119	5.1	13.43	0.52	72.4	3.3	12.9	0.59	30.1	1.4	3.4	0.15	19.2	1.1	2.51	0.11	2.54	0.8	4.86	0.24	1.87	0.11	2.58	0.23	11.18	0.5	4.39	0.2
BTW08_61	422	17	523	25	1135	41	1.314	0.096	536	24	2151	89	332	17	1633	66	349	13	54.6	2.1	298	11	37.6	1.2	215.6	7.5	40.5	1.4	103.2	3.1	13.54	0.45	80.6	3.1	11.94	0.48	6.2	1.4	67.9	1.9	12.56	0.45	15.74	0.64	81.6	3.5	66	2.5
BTW08_62	240	11	297	12	684	30	0.5	0.051	817	41	2020	100	232	12	978	39	197.7	8.7	34.9	1.5	176.8	6.7	23.04	0.82	131.8	5.5	24.47	0.92	62.2	2	7.78	0.37	48.4	1.9	7.94	0.41	2.98	0.87	42.4	1.8	7.28	0.25	10.65	0.62	92.4	3.7	44.1	2.7
BTW08_63	360	18	405	18	974	42	12.26	0.5	555	23	1453	73	198.1	8.5	976	40	221.5	7	30	1.3	206	8.3	29.1	1.2	181.8	6.6	32.6	1.5	85.1	3.8	10.26	0.39	58.7	2	7.38	0.29	1.36	0.47	2.1	0.11	1.334	0.079	1.59	0.12	2.81	0.17	1.048	0.049
BTW08_64	262.5	7.2	530	14	208.6	7.2	0.156	0.028	27.6	1.8	108.4	5.3	22.9	1.2	142.4	7.1	48.7	2	12.06	0.45	52.6	1.9	6.92	0.34	40.4	1.8	7.43	0.24	18.84	0.84	2.15	0.11	12.75	0.64	2.092	0.082	1.73	0.59	4.18	0.24	2.11	0.22	2.3	0.24	15.11	0.98	3.223	0.087
BTW08_65	495.2	9.6	431	25	757	32	0.346	0.05	489	15	1484	55	191.5	7.4	894	35	220	8.6	43.9	1.7	222	7.8	29.3	1.3	157.3	7.1	27.2	1.3	65	2.7	8.09	0.36	50	2	9.4	0.32	2.73	0.91	31.72	0.7	5.74	0.17	8.21	0.38	74	3.6	26.35	0.97
BTW08_66	26.01	0.81	2951	50	417.1	7.5	0.74	0.13	100.2	2.3	364.2	9.9	61.9	1.5	396	11	162.5	4	31.66	0.71	202.9	4	27.95	0.53	147.6	2.4	21.92	0.36	40.71	0.72	3.51	0.1	13.64	0.38	1.343	0.033	1.76	0.76	1.99	0.27	1.55	0.16	2.07	0.3	12.77	0.64	0.217	0.088
BTW08_67	563	10	222.8	4.7	850	28	2.62	0.21	1626	51	3021	99	312.5	9.3	1215	36	212.5	7.4	46.6	1.4	192.1	6.4	24.07	0.89	140	4.3	27.31	0.88	73.6	2.4	9.53	0.32	60.4	1.5	10.29	0.29	4.64	0.85	24.26	0.86	6.02	0.19	13.56	0.57	88.6	4.8	22.3	1.1
BTW08_68	347	13	335	14	740	25	0.59	0.11	231.1	7.3	881	39	141.4	6.8	763	39	209.4	8.1	37	1.8	211.2	9.5	26.5	1	148.4	7.7	26	1	63.5	2.6	7.33	0.25	44.8	1.4	7.52	0.24	2.32	0.67	44.1	1.8	7.16	0.33	7.48	0.4	53.9	2.1	42.5	1.5
BTW08_69	232	8	254	10	1340	53	1.113	0.089	760	29	2400	110	365	14	1744	73	361	14	42.7	1.5	311	13	41.6	1.3	252.5	9.5	48.5	1.8	135.7	4.8	18.84	0.73	118.3	4.4	16.72	0.63	3.05	0.91	73.9	3.1	10.19	0.48	7.12	0.37	39.7	1.8	79.6	2.4
BTW08_70	57.3	2.2	1009	53	491	22	0.587	0.07	96	4.9	481	18	100.9	5.3	639	31	246.2	8.3	48.8	1.5	281	10	34.8	1.4	171.7	6.6	24.62	0.84	44	1.4	3.3	0.14	12.76	0.49	1.256	0.065	0.62	0.37	1.065	0.062	0.937	0.048	2.32	0.19	54.4	2.2	0.1735	0.0087
BTW08_71	301	13	255	15	698	37	0.93	0.42	569	31	1549	67	203	12	958	53	228	11	37.3	2.2	234	12	30.2	1.8	164.5	8.5	29	1.5	63.8	2.3	6.89	0.32	36.2	1.4	4.98	0.2	1.65	0.58	6.89	0.31	2.46	0.13	4.58	0.29	66.7	5.6	5.14	0.2
BTW08_72	207.8	3.9	452.3	7.8	838	15	12.79	0.34	431	11	1182	24	170.2	4.8	849	17	209.6	5.4	35.27	0.79	203	3.7	27.73	0.54	163.3	3	30.1	0.62	72.3	1.6	8.61	0.18	47.72	0.94	5.85	0.16	2.96	0.98	4.16	0.16	3.14	0.15	3.57	0.2	12.39	0.28	1.115	0.031
BTW08_73	43.1	5.1	1570	100	591	25	0.068	0.015	131	11	568	37	105.4	5.2	719	39	292	11	58.3	2.8	349	15	43.6	1.8	217	10	31.4	1.4	54.3	2.2	4.09	0.21	13.75	0.52	1.339	0.048	0.65	0.4	8.9	1.5	1.72	0.19	2.38	0.23	52.4	3.2	9.3	1.6
BTW08_74	181.3	8.2	611	26	647	28	0.433	0.051	224	10	916	50	155.2	6.3	857	29	208.9	8.3	35.4	1.4	190.6	6.8	23.24	0.99	131.7	5.9	22.86	0.86	59.6	2.3	7.37	0.25	44.4	1.8	5.97	0.28	3.08	0.83	11.55	0.36	3.71	0.15	3.59	0.23	7.36	0.42	9.6	0.35
BTW08_75	345	10	517	23	500	19	10.44	0.42	222.1	6.8	701	35	99	3.3	543	24	133.2	4.7	32.6	1.1	137.6	6.1	17.87	0.74	100.2	3.3	18.5	0.58	43.3	1.4	4.83	0.19	26.76	0.94	3.58	0.13	0.61	0.36	0.851	0.078	0.393	0.057	0.596	0.095	3.24	0.66	0.672	0.023
BTW08_76	258.7	9.9	236	10	473	19	0.285	0.044	637	36	1577	84	179.3	8	746	34	128.4	4.7	18.39	0.67	108.5	3.9	13.38	0.55	76.4	3.1	15.65	0.67	41.7	1.8	5.61	0.23	35.9	1.6	6.36	0.23	2.26	0.75	40.9	2.4	6.91	0.34	10.51	0.63	59.4	4.3	36.7	2.1
BTW08_77	195	6.5	472	18	707	26	0.722	0.061	200.8	5.5	862	28	143.1	4.7	853	24	275.5	8.2	76.1	2.6	295.3	7.6	39.2	1.6	199.3	7.6	30.74	0.89	62.5	2.3	6.01	0.2	29.48	0.98	3.83	0.13	1.89	0.65	31.2	1.3	4.74	0.17	5.34	0.19	57.5	2.5	30.8	1
BTW08_78	454	13	259	8.5	780	40	0.029	0.011	3.51	0.17	15.64	0.76	3.32	0.18	28	1.6	19.9	1.3	5.56	0.27	51.1	2.4	10.98	0.51	100.6	4.8	27.4	1.3	90.2	3.9	12.78	0.67	75.7	3.4	11.59	0.56	2.53	0.74	4.57	0.14	2.95	0.088	2.86	0.2	0.131	0.029	6.33	0.49
BTW08_79	630	19	547	17	587	22	0.396	0.061	721	28	2180	110	304	12	1419	61	273	10	19.3	0.7	196.5	6.9	21.96	0.8	115.4	3.9	20.85	0.73	52.5	1.6	6.65	0.23	40.9	1.6	5.98	0.24	4.1	1.1	39.7	1.3	8.74	0.36	6.56	0.42	16.06	0.77	32.6	1.3
BTW08_80	301	9.4	561	21	595	25	14.06	0.6	285	11	832	43	118.7	5.6	624	24	148.6	5.4	36.5	1.3	152.1	6	20.27	0.71	119.7	3.8	21.39	0.81	53	2.2	6.14	0.25	33.1	1.4	4.27	0.19	0.6	0.39	1.434	0.075	0.796	0.051	1.084	0.097	3.05	0.22	0.878	0.033
BTW08_81	424	18	187.7	7.4	976	39	0.0155	0.0091	5.5	1.4	21.3	6	4.3	1.2	27.4	7.7	12.5	2.8	10.66	0.61	25.3	2.6	6.72	0.36	81.1	2.7	29.8	1.3	131.2	6.3	25.5	1.1	193.6	7.4	31	1	2.02	0.8	3.64	0.15	2.6	0.12	2.69	0.21	3.9	1.6	3.32	0.18
BTW08_82	129	5.9	529	14	839	35	11	0.51	409	18	1162	45	167.2	8	893	39	255.5	9.5	56.6	2.2	256.3	9.1	35.3	1.1	199.3	8.9	33.5	1.4	73.3	2.6	8.27	0.3	43.1	2.1	5.3	0.17	3.54	0.99	3.82	0.19	2.81	0.16	4.44	0.26	44.8	2.6	1.489	0.049
BTW08_83	533	19	374	15	714	27	0.148	0.027	40.7	2	170	8	35.6	1.7	228	11	86	3.2	18.13	0.78	103.2	3.3	14.33	0.51	95	3.8	21.51	0.66	66.6	2.6	9.67	0.35	69.6	1.9	13.17	0.46	3.3	0.84	11.95	0.65	4.32	0.45	4.79	0.65	11.17	0.62	12.58	0.43
BTW08_84	311.5	5.3	371.5	6.2	1050	18	39.5	3	571	11	1557	32	208.6	4.2	1049	19	256	4.5	36.1	0.76	251	5.6	35.31	0.72	214.3	4.8	39.9	1	102.6	2.5	12.61	0.34	69.1	1.7	8.7	0.22	3.1	1	6.76	0.27	3.77	0.19	5.85	0.35	38	1.4	5.02	0.14
BTW08_85	240.1	7.2	412	25	900	29	1.047	0.066	914	27	2528	90	340	12	1531	51	319	10	114.6	3.5	305.3	9.8	37.9	1.3	196.9	8.1	33.5	1.3	79.3	3.3	9.13	0.37	53.9	1.8	8.73	0.31	6.5	1.2	61.4	1.7	12.04	0.31	16.07	0.56	113.4	4.7	60.6	2
BTW08_86	442	14	418	13	232	25	0.313	0.064	497	17	752	27	75.2	3.7	324	25	79	8.5	16.6	1.9	83	11	11.1	1.6	62.2	8.5	10.2	1.3	21.2	2.3	2.11	0.2	9.24	0.76	1.282	0.076	1.59	0.7	12.11	0.36	2.964	0.089	3.57	0.2	39.9	6	10.25	0.32
BTW08_87	883	24	641	20	1020	31	0.384	0.03	336	11	1298	46	242.9	9.1	1443	54	369	14	68.4	2	299.7	8.2	35.8	1.3	191.9	7.1	34.7	1.1	87.8	3.4	10.79	0.33	66	2.4	11.02	0.34	4.9	1	32.1	0.93	7.43	0.3	5.95	0.41	13	0.63	28.03	0.74
BTW08_88	220.4	7.3	299	11	1649	55	1.061	0.079	741	27	2650	110	422	18	2227	77	475	17	69.9	2.6	384	12	52.9	1.9	314	11	57.7	1.9	164.1	6.2	22.56	0.87	147.4	6.4	20.99	0.6	3.99	0.98	50.6	1.7	8.59	0.37	8.8	0.55	43.6	2.3	51.8	1.9
BTW08_89	170.1	5.7	108.8	4.2	2063	90	0.537	0.054	1902	65	5640	180	719	33	3050	140	587	24	33.6	1	458	13	63.1	2	366	11	73.9	2.7	198.1	6.4	25.3	0.91	152.5	5.9	22.12	0.6	1.71	0.63	15.73	0.48	2.96	0.13	2.45	0.16	9.9	0.44	17.56	0.6
BTW08_90	201	6.9	337	15	1522	68	0.036	0.013	79	2.8	404	16	67.1	2.6	463	17	181.5	8.6	37.3	1.4	238.3	7.8	37.9	1.8	262	11	54.8	2	162.8	5.4	23.49	0.82	152.4	5.8	21.47	0.65	1.66	0.67	8.53	0.31	2.608	0.084	2.46	0.17	5.43	0.31	8.38	0.24
BTW08_91	161.9	7.7	535	18	498	22	1.029	0.092	239.7	9.9	896	35	153.1	8.2	808	31	190.3	7	34.1	1.2	156	5.7	18.68	0.73	104.1	3.8	18.37	0.7	47.1	1.8	5.72	0.27	33.2	1.3	4.74	0.17	1.78	0.71	11.99	0.46	3.4	0.14	4	0.33	13.14	0.75	12.72	0.45
BTW08_92	606	22	225.2	7.3	2324	84	29	5.4	24.8	8.3	89	22	14.4	2.6	87	12	44.3	3.4	8.11	0.56	86.5	3.8	22.6	1.1	237	10	74.7	2.8	315	11	57.8	1.9	424	15	65.9	2.4	4.62	0.74	8.57	0.46	4.9	0.33	5.78	0.48	23.7	1.8	14.44	0.64
BTW08_93	254	12	468	21	914	43	17.12	0.77	475	21	1281	52	186.5	8.9	971	42	236.7	9	42.1	1.6	229	8.9	31.5	1.3	186.5	6.9	32.6	1.2	81.6	3.6	9.24	0.38	50.8	2.1	6.29	0.25	1.04	0.45	2.85	0.14	1.706	0.072	2.37	0.16	19.3	1.1	1.644	0.066
BTW08_94	452	15	248.1	9.2	345	13	0.884	0.058	509	16	1361	65	155.7	6.9	613	17	100	3.6	60	2	74.6	2.2	8.31	0.27	46.1	1.6	9.92	0.36	30.8	1.3	4.75	0.17	34.4	1.3	6.83	0.23	4	1.1	120.1	4.7	17.73	0.8	18	1.2	91.7	3.8	127.7	3.7
BTW08_95	380	17	1492	71	336	12	2.26	0.14	746	34	1813	94	231	10	1022	41	181.1	5.6	28.5	1.3	134.7	6.2	14.36	0.53	75.5	2.7	13.42	0.61	32.1	1.2	3.82	0.18	21.17	0.79	2.62	0.12	2.56	0.78	36.5	1.3	6.22	0.24	10.05	0.64	56.3	2.1	33.4	1
BTW08_96	294.3	8.5	424	17	822	15	0.542	0.05	287.1	9.2	1110	26	171.3	5	929	25	234.3	6.8	34.82	0.97	203.6	6.2	25.05	0.69	142.4	3.5	27.69	0.77	73.4	2.2	9.78	0.31	61	2	9.72	0.26	2.7	0.58	56.5	1.2	8.01	0.22	8.39	0.43	51.7	1.5	56.2	1.4
BTW08_97	193.3	2.5	889	21	476	13	9.39	0.3	459.6	6.2	1262	17	176.1	2.9	919	14	234.7	4.8	40.38	0.82	232	5.7	28.17	0.78	141.7	4.1	21.21	0.67	41.9	1.2	3.88	0.12	17.4	0.43	2.162	0.059	4.3	1.2	28.41	0.69	7.46	0.35	13.06	0.48	71.22	0.99	22.02	0.32
BTW08_98	91.7	4.8	2639	90	567	16	1.17	0.35	103.2	3.6	347	12	60.6	2.4	395	14	191.5	9	36.4	1.2	260.2	9.9	38	1.3	195	7.8	29.3	1.1	55.9	1.5	4.81	0.18	19.19	0.73	1.822	0.079	1.9	0.99	2	0.14	1.64	0.091	2.25	0.27	15.33	0.87	0.618	0.03
BTW08_99	613	22	248	11	199	11	0.138	0.028	135.1	7.8	382	21	51.5	3.3	230	13	42.4	2.9	23.4	1.1	39.1	2.3	4.7	0.33	27.6	1.8	5.95	0.33	18.4	1.1	2.59	0.16	18.4	1.1	3.5	0.18	3.52	0.88	30.5	1.9	7	0.4	6.32	0.46	12.6	1	25.9	1.7
BTW08_100	520	20	325	15	1068	57	0.266	0.039	121.1	5	977	57	267	15	1873	93	469	22	16.86	0.82	355	15	43.5	2.5	228	12	41	2	96	4.8	10.66	0.5	59	2.4	8.08	0.39	3.6	1.1	27.7	1.3	5.15	0.23	2.96	0.25	5.21	0.85	34.6	1.7
BTW08_101	268	10	409	15	541	22	0.78	0.12	613	25	1447	69	173.7	8	779	25	157.3	5.9	22.88	0.8	145.6	5	17.97	0.66	103.9	3.6	19.78	0.7	54.9	1.7	6.69	0.29	39.9	1.3	6.28	0.2	5.8	1	15.68	0.53	6.72	0.31	6.26	0.33	10.16	0.54	37.3	1.3
BTW08_102	598	25	471	25	741	39	1.07	0.1	1558	78	4020	280	449	27	1730	120	271	16	54.9	2	193.4	9.5	22.1	1	124.9	7	24	1.3	65.3	3.5	8.93	0.44	60.9	3.4	11.13	0.56	5.4	1	17.2	1.4	6.79	0.56	10.66	0.9	53.6	3.7	13.19	0.95
BTW08_103	375	18	532	18	784	31	12.93	0.53	351	16	1052	55	146.1	5.8	783	32	197.5	6.3	46.5	1.8	195.2	8.5	26.22	0.9	146.9	6.3	27.3	1.1	65.4	2.6	7.68	0.32	41.7	1.7	5.23	0.2	1.27	0.5	2.3	0.15	1.55	0.13	2.05	0.16	9.09	0.7	1.159	0.052
BTW08_104	385	13	660	23	673	27	1.54	0.12	299	14	1391	59	219.8	6.8	1195	42	262	11	30.5	1.1	198.1	6.7	23.29	0.73	128.6	4.7	23.28	0.81	60.5	1.8	7.52	0.3	42.6	1.4	5.76	0.16	1.66	0.64	14.19	0.42	3.18	0.11	4.62	0.31	22.56	0.97	13.38	0.36
BTW08_105	182.2	7.3	203	11	558	20	0.106	0.025	12.6	1	54.3	4.9	13.62	0.93	120	6.6	66.7	3.4	8.2	0.52	108.8	5.2	16.6	0.47	105	4.9	21.98	0.96	61.5	2.9	7.87	0.29	45.5	2.4	6.26	0.25	2.51	0.74	4.42	0.2	2.95	0.15	2.94	0.25	3.24	0.35	2.035	0.082
Sample 5		Location: Bunatrahir West			Grid Coordinates: 54°18'31.6''N, -9°23'35.6''W
	Mn55	2σ	Sr88	2σ	Y89	2σ	Zr90	2σ	La139	2σ	Ce140	2σ	Pr141	2σ	Nd146	2σ	Sm147	2σ	Eu153	2σ	Gd157	2σ	Tb159	2σ	Dy163	2σ	Ho165	2σ	Er166	2σ	Tm169	2σ	Yb172	2σ	Lu175	2σ	Pb204	2σ	Pb206	2σ	Pb207	2σ	Pb208	2σ	Th232	2σ	U238	2σ
BTW11_0	1468	58	418	18	1666	77	0.142	0.027	126	6.2	490	24	93	4.5	489	21	207	8.4	39.5	1.7	268.1	9.6	51.4	2.4	365	15	68.7	3	184.7	8.6	23.99	0.96	144	6.6	17.85	0.59	4	1	14.24	0.54	4.62	0.21	4.18	0.35	1.47	0.079	41.6	1.5
BTW11_1	492	21	749	47	251	16	5.1	1.3	89.9	4.3	322	21	52	3.5	292	14	87.8	3.3	17.85	0.91	88.4	4.3	10.35	0.52	53.7	2.9	10.24	0.59	26.7	1.4	3.26	0.24	21.3	1.5	3.49	0.27	5.7	1.2	13.8	0.55	7.19	0.32	7.25	0.52	2.5	0.24	25	1.2
BTW11_2	639	32	383	16	968	44	0.035	0.011	46.5	2.9	191	12	35.5	1.8	227	11	96	4.1	10.08	0.53	144.2	7.2	25.4	1.3	176.9	8.3	34.4	1.7	95.9	4.8	11.82	0.54	65.2	3.4	7.81	0.36	7.7	1.6	11.85	0.5	8.44	0.33	8.4	0.52	0.35	0.041	10.75	0.47
BTW11_3	321	12	265.8	9.5	518	23	1.232	0.082	1188	57	2760	120	306	14	1067	46	158.2	5.6	23.7	1	119.8	5	15.11	0.6	82.7	3.6	17.15	0.63	50.7	2.2	6.6	0.26	45.7	2	7.67	0.3	4.5	1.2	58.5	2.2	10.47	0.38	13.75	0.64	63.3	2.7	50.3	2.2
BTW11_4	555	37	406	31	595	36	1.086	0.072	2580	150	4100	270	347	24	1241	74	174	12	33.9	2.2	133.7	7.3	16.2	0.88	91.7	5.6	18.8	0.92	55	3.2	7.95	0.43	55.6	3.2	10.01	0.59	16	2.4	96.4	5.3	26.5	1.6	33.7	2.4	93.9	7.2	65.9	3.9
BTW11_5	430	22	97.8	4.8	1409	56	0.148	0.043	10.78	0.56	50.3	2.1	9.68	0.43	67.8	3.7	36	2	1.964	0.094	67.8	2.8	17.42	0.81	178	7.5	49.7	2.2	159.9	5.7	22.69	0.96	128.2	6.2	16.19	0.61	1.48	0.52	3.76	0.17	2.04	0.11	2.02	0.17	2.5	0.24	6.81	0.33
BTW11_6	668	33	263	10	888	36	73	56	143.7	7.2	547	24	87.9	5.2	491	20	178.4	8.1	14.52	0.69	207.1	8.3	36.8	1.7	227	11	36.4	1.4	77.1	4	8.37	0.41	42.8	1.8	4.75	0.22	8.7	1.6	13.43	0.5	8.54	0.36	8.31	0.35	0.284	0.051	18.58	0.76
BTW11_7	318	11	823	23	278.4	8.9	2.24	0.12	927	32	2272	75	249.7	8.7	928	29	134.6	4.2	24.45	0.72	90	2.5	9.87	0.35	53.3	1.9	9.92	0.29	26.38	0.67	3.326	0.096	20.66	0.56	3.019	0.092	9	1.6	28.7	1.2	11.86	0.66	17.65	0.91	49.5	1.9	16.42	0.51
BTW11_8	433	15	186	4.9	1099	43	0.57	0.064	812	27	2565	98	378	17	1616	69	315.6	9.3	34	1.4	246.2	8.7	31.59	0.94	189.6	7.6	38.2	1.1	109.3	3.5	14.66	0.53	90.6	3	13.21	0.49	3.72	0.78	46.8	1.6	9.63	0.26	11.31	0.56	42.3	1.6	37.42	0.91
BTW11_9	447.1	5.8	386.9	6.6	826	17	0.623	0.074	856	13	2464	42	339.4	6.7	1554	28	279.2	4.5	36.81	0.67	231.1	3.8	27.39	0.46	158.9	3	29.71	0.58	75.9	1.4	9.28	0.19	52.9	1.1	7.23	0.16	2.65	0.68	52.5	1	9.19	0.19	8.68	0.32	34.61	0.75	42.58	0.69
BTW11_10	304	14	209	15	1429	99	0.38	0.061	278	16	1570	110	310	20	1636	90	407	24	48.7	3	344	18	43.7	2.6	258	16	48.1	2.9	130.5	7.2	17	1.2	95.8	4.7	16.29	0.94	9.3	1.3	45.2	2.9	13.42	0.5	17.7	1.1	59.8	5.3	35.9	2.8
BTW11_11	450	11	228.2	8.4	489	14	0.81	0.46	1029	33	2387	73	271.2	9.7	1145	35	189.6	4.9	10.82	0.27	155.2	3.9	17.9	0.52	100.8	2.6	18.56	0.48	48.1	1.4	5.72	0.18	31.39	0.76	4.6	0.12	4.3	1.1	9.82	0.24	5.34	0.22	6.26	0.29	9.69	0.38	4.81	0.12
BTW11_12	788	25	267.3	8.3	2480	100	0.113	0.047	21.54	0.69	88.9	3.1	21.11	0.98	189.8	6.8	129.3	4.4	32.36	0.93	232.7	7.3	43.5	1.2	346	11	77	2.4	242.9	8.9	36.7	1.3	229.1	5.6	32.8	1	3.08	0.92	11.68	0.36	4.29	0.14	3.74	0.25	3.71	0.16	8.61	0.22
BTW11_13	774	43	185.2	7.4	1903	78	0.038	0.015	96.9	5	411	17	75.9	3.3	438	17	214.6	9.8	6.03	0.27	293.6	8.9	57	2.1	394	16	74.8	2.5	203.1	8.1	26.66	0.89	160.4	6.6	19.79	0.53	3.73	0.99	7.18	0.28	3.22	0.11	2.85	0.23	0.653	0.055	16.92	0.55
BTW11_14	395	17	747	34	567	23	0.489	0.05	732	27	2330	110	321	15	1424	56	258.3	8.8	15.41	0.62	187.4	8.3	20.69	0.73	113.6	4.9	19.87	0.81	50.7	1.9	6.47	0.23	36.5	1.3	5	0.16	3.6	0.78	39.9	1.4	8.31	0.25	6.55	0.47	19.52	0.75	34.5	1.1
BTW11_15	680	14	431.1	8.2	445.3	9.9	0.404	0.038	409.3	8	1249	20	169.5	2.5	796	15	150.4	3.2	28.66	0.56	127.8	2.3	14.38	0.38	79.8	1.5	15.2	0.34	40.21	0.89	5.16	0.12	32.84	0.66	5.47	0.13	7.3	1.3	31.64	0.51	10.29	0.26	8.61	0.31	7.99	0.26	24	0.38
BTW11_16	500.4	6.5	359.6	3.2	650.6	8.5	1.09	0.19	904	15	2263	31	275.6	5.2	1132	14	191.2	2.8	48.97	0.73	159	2.1	18.93	0.31	111	1.9	22.12	0.4	62.6	1	8.51	0.18	55.2	1	9.09	0.17	5.4	1.1	28.07	0.55	8.32	0.28	11.69	0.36	37.41	0.73	18.33	0.37
BTW11_17	273.2	3.6	376.5	7.2	1134	17	13.59	0.27	625	16	1651	36	220.8	4.5	1051	25	235.9	5	26.25	0.61	234.9	5.1	33.38	0.9	205	4.1	38.86	0.93	105.3	2.5	13.51	0.31	77.7	1.9	10.01	0.24	3.82	0.98	6.01	0.19	4.43	0.13	5.22	0.26	5.1	0.22	1.514	0.052
BTW11_18	232.4	8.9	563	14	572	18	12.32	0.4	266	10	794	32	109.3	4.2	594	24	144.1	5.9	36	1.1	143.7	4.3	18.53	0.61	109.8	3.1	19.8	0.56	48	1.5	5.75	0.18	30.2	0.99	3.8	0.11	1.04	0.47	2.19	0.1	1.555	0.087	1.8	0.15	2.14	0.12	0.67	0.021
BTW11_19	361	16	174.5	8.2	667	24	0.101	0.023	293	12	1175	41	184.8	6.1	958	44	206.1	8.6	20.25	0.83	171.9	6.6	20.52	0.75	119.7	3.9	22.46	0.93	59.3	2.1	7.55	0.3	46.5	1.6	7.65	0.26	6.6	1.3	16.87	0.59	7.73	0.32	8.3	0.51	15.23	0.74	10.16	0.35
BTW11_20	376	14	490	21	1231	40	0.795	0.078	310	13	1413	59	265	12	1479	45	377	11	51	1.7	321	12	37.9	1.4	211	7.3	40.8	1.5	111.2	3.2	15.09	0.52	97.9	3.1	15.34	0.46	3.94	0.84	109.3	3.5	15.82	0.67	13.84	0.68	73.8	2.6	107	2.9
BTW11_21	829	29	510	19	475	16	0.449	0.042	511	21	1067	46	123.2	6.4	537	20	101.2	2.9	30.2	1.1	101.5	3.7	12.86	0.43	80.2	2.9	16.33	0.48	46.2	1.6	6.15	0.19	39.8	1.5	6.89	0.19	4.73	0.74	12.57	0.5	6.66	0.25	6.54	0.29	8.36	0.38	11.5	0.42
BTW11_22	321	14	302	15	888	35	0.33	0.22	17.87	0.84	70.4	3.3	13.95	0.64	92.2	4.4	54.2	2.6	11.49	0.6	119.8	5	24.42	0.95	175.3	7.3	31.8	1.5	76.4	3.3	9.75	0.48	56.4	2.2	6.98	0.28	12.2	1.6	16.02	0.61	12.67	0.51	13.13	0.74	0.565	0.088	8.87	0.4
BTW11_23	1134	56	253	10	442	17	0.554	0.089	1109	46	2430	110	223	10	728	32	93.6	5	15.73	0.76	78	3.8	9.72	0.41	57.6	2.3	13.13	0.46	40.1	1.9	6.5	0.32	46.7	2	8.6	0.37	4.8	1	7.81	0.26	5.19	0.18	6.34	0.31	42.9	2.3	11.86	0.55
BTW11_24	334	15	364	15	799	34	9.96	0.48	129.1	9	475	29	77.3	4.1	431	18	126.4	4.7	27.2	1.3	145.3	7	20	0.96	130.9	6.1	28.7	1.3	81	3.8	11.24	0.62	73.6	3.8	12.63	0.59	6.7	1.1	12.57	0.37	8.13	0.26	8.76	0.45	8.16	0.36	4.63	0.15
BTW11_25	273	13	566	24	593	24	0.462	0.053	254.6	9	982	50	153.2	7.1	834	34	198.1	8.5	28.6	1.2	167.6	6.7	20.82	0.68	118.9	4.2	21.17	0.85	54.2	2	6.88	0.27	39.8	1.9	5.58	0.21	5.3	1.2	21.09	0.56	6.55	0.24	7.98	0.41	29	1.4	20.24	0.69
BTW11_26	374	11	165.2	3.4	1316	40	0.441	0.049	958	31	2901	86	409	12	1911	64	356	11	65.9	2	297	6.4	38.7	0.96	226.6	6.5	43.3	1.3	122.6	3.2	16.32	0.47	105.7	3.5	15.07	0.41	4.2	1.1	46.32	0.99	9.39	0.26	7.83	0.33	21.15	0.95	42.13	0.96
BTW11_27	243.4	7.5	862	43	555	32	0.299	0.068	654	36	1670	83	211	12	1005	47	191.4	9.8	26.8	1.5	157.7	5.9	18.14	0.77	100	4.2	17.66	0.85	49.4	2.3	6.17	0.31	38	2.4	5.94	0.29	2.35	0.81	35.8	2.2	6.84	0.55	6.68	0.57	27	2.2	30.8	2
BTW11_28	672.9	8.4	383.6	9.6	1620	25	4.1	2.1	319.8	6.8	1179	20	192.3	3.4	1070	16	317.1	5.8	20.37	0.49	344.1	5.8	45.51	0.71	278.6	4.1	57.06	0.97	164.1	2.4	21.8	0.36	134.9	2.7	20.1	0.38	3.08	0.9	58.98	0.94	10.38	0.29	8.93	0.31	35.41	0.88	52.3	1.1
BTW11_29	270	11	368	17	1155	59	11.42	0.99	718	34	1819	81	243	13	1089	47	248	10	30.2	2.2	236.3	9.7	33.6	1.4	203.5	7.3	37.9	1.6	99.7	3.3	13.36	0.49	72.4	3.1	9.04	0.31	2.05	0.69	2.368	0.084	1.528	0.068	1.91	0.15	3.78	0.19	1.057	0.041
BTW11_30	468	17	237.5	9.3	1212	49	0.87	0.074	753	37	2540	110	374	14	1770	83	343	12	44.4	1.2	285.6	9.7	36.8	1.2	212.5	6	40.9	1.3	113.2	3.7	15.78	0.52	101.1	3.6	15.31	0.37	2.85	0.85	128.2	3.1	17.25	0.52	8.89	0.45	39.3	1.7	121.8	3.7
BTW11_31	518	18	184.1	5.5	1575	57	1.81	0.69	10.62	0.48	43.8	2.5	8.46	0.4	63.9	3.6	38.1	1.8	11.71	0.54	98.3	4	24.02	0.92	217.8	7.5	54.1	2	163.4	6	23.59	0.92	143.5	5.9	20.66	0.67	5.75	0.95	7.56	0.49	5.86	0.41	6.46	0.53	0.225	0.027	4.74	0.15
BTW11_32	326	16	297	12	622	32	0.441	0.042	350	19	1069	53	155	8	784	42	142.1	6.6	31.7	1.4	137.6	5.3	16.53	0.69	102.1	4	20.65	0.99	59.2	3	7.93	0.4	52.6	2.7	8.99	0.38	5.27	0.9	38	1.6	9.89	0.39	8.7	0.5	20	1.1	28.3	1.2
BTW11_33	385.8	8.3	345.2	9.7	1151	37	12.86	0.48	664	24	1717	59	247.8	9.7	1198	35	294.6	8	34.29	0.93	284.2	8.1	38.5	1.2	221.5	5.8	39.7	1.2	95.4	2.9	10.43	0.25	54.6	1.3	6.53	0.19	2.38	0.91	2.99	0.22	2.12	0.18	2.19	0.18	4.74	0.15	2.266	0.053
BTW11_34	274.1	8.9	273.1	8.8	184	8.4	240	120	82.5	4.1	210	12	29.9	1.2	162.1	8.9	44.5	2.1	18	0.75	57.8	2.4	6.96	0.25	39.1	1.6	7.68	0.31	19.46	0.88	2.218	0.091	12.77	0.54	1.883	0.095	2.47	0.69	12.03	0.6	3.72	0.23	2.49	0.25	0.82	0.22	8.97	0.45
BTW11_35	311.3	5.7	367.1	7	730	16	0.914	0.094	168.6	3.9	743	20	132.3	3	744	20	189	3.9	42.29	0.91	163.9	3.5	19.81	0.43	113.5	2.2	22.34	0.47	64.6	1.6	8.95	0.2	60.8	1.3	10.68	0.24	6.1	1.4	43.02	0.87	10.35	0.25	10.09	0.35	28.5	1	35.2	1.1
BTW11_36	429.8	5.1	283.7	3.4	4014	57	1.33	0.2	131.4	6.5	659	27	134.9	4.6	910	27	399	8	43.19	0.71	519	10	86.3	1.9	597.7	9.5	127.1	1.8	390.5	6.2	58.6	0.96	401.1	7.2	63.8	1	6.3	1.5	67.1	1.5	14.17	0.41	18.81	0.7	80	1.8	55.25	0.85
BTW11_37	443.3	7.8	404.9	7.2	197	3.4	0.915	0.079	757	12	1364	21	117.9	1.8	403.1	6.5	52.8	1.2	18.84	0.39	45.2	0.79	5.02	0.11	28.5	0.6	5.83	0.13	17.48	0.32	2.505	0.058	17.46	0.47	3.416	0.07	7.9	1.3	85.5	1.6	17.25	0.26	15.59	0.45	46.49	0.92	69.93	0.98
BTW11_38	428	14	243.8	8.9	671	31	0.43	0.17	1113	50	3040	190	366	19	1530	79	241	10	13.56	0.64	184.2	6.7	21.72	0.63	122.6	3.9	23.21	0.89	59.6	2.3	7.29	0.23	39.6	1.4	5.64	0.15	4.7	1	12.89	0.35	5.83	0.21	6.92	0.38	14.43	0.59	7.08	0.21
BTW11_39	471.7	5.6	223.3	3	875	14	3.14	0.28	286.3	6.6	1386	35	256.9	4.6	1510	29	341.9	8.3	68.2	1.1	279.6	5.3	32.36	0.61	175.3	3.5	30.77	0.67	76.9	1.7	9.17	0.23	51.1	1.2	6.71	0.15	10.1	1.9	20.17	0.9	10.72	0.8	13.05	0.76	22.28	0.6	9.33	0.21
BTW11_40	464	15	92.8	2.3	1181	28	0.45	0.22	11.93	0.41	64.1	2.6	15.72	0.49	130.2	4.6	77.9	2.8	9.5	0.38	139.4	4.3	24.59	0.79	173.4	5.2	40	1	118.4	4.6	16.2	0.51	100.9	3.3	14.4	0.47	5.1	1.1	6.77	0.22	5.53	0.21	5.6	0.2	0.088	0.021	2.528	0.082
BTW11_41	521	23	449	16	111.6	4	0.034	0.012	471	22	905	59	80.2	3.1	305	15	42.8	1.8	12.02	0.39	31.6	1.4	3.41	0.14	17.67	0.56	3.47	0.15	9.46	0.41	1.252	0.068	8.22	0.38	1.445	0.051	4.4	1.1	7.77	0.31	3.87	0.19	4.02	0.31	5.09	0.27	4.27	0.13
BTW11_42	385	15	324	12	42.5	2.4	0.16	0.026	5.37	0.49	22.6	1.5	4.21	0.31	27.6	2.1	7.82	0.69	2.14	0.2	10.06	0.72	1.178	0.091	7.31	0.41	1.627	0.07	5.42	0.29	0.962	0.045	7.53	0.39	1.423	0.052	3.38	0.7	9.78	0.5	4.56	0.21	3.97	0.27	1.83	0.14	5.65	0.25
BTW11_43	691	30	99.9	3.7	1938	77	0.0078	0.006	39.9	2	137.8	7.3	25.2	1.1	173.5	6	100	3.8	15.24	0.66	196.8	6.9	41.4	1.7	337	14	71.1	3.4	195	8.8	24.9	1.3	145.7	6.3	17.53	0.72	2.31	0.78	3.33	0.54	2.61	0.41	2.74	0.45	3.5	1.6	0.87	0.11
BTW11_44	529	22	333	11	345	18	0.0298	0.0096	17.29	0.8	76.2	3.8	13.01	0.54	83.9	3.1	28.1	1.2	8.85	0.31	36.8	1.4	6.31	0.21	49.2	1.9	10.82	0.38	33	1.1	5.11	0.21	33.3	1.5	4.82	0.19	3.87	0.9	6.71	0.24	3.75	0.16	3.7	0.22	0.609	0.054	12.38	0.42
BTW11_45	437	14	248	12	1990	110	0.187	0.037	53.7	3.2	245	12	56.5	2.4	434	23	245	12	23.5	1	336	18	52.8	2.5	351	17	69.7	3.3	200.9	9.8	27.1	1.1	159.8	7.4	23.4	1.2	6.2	1.2	25.91	0.95	8.34	0.32	8.07	0.44	14.5	1.2	19.29	0.78
BTW11_46	345	13	128.4	7.2	36.6	1.8	2.4	1.4	18.6	1.2	29.7	2.1	2.97	0.18	15.3	1	4.12	0.25	1.179	0.081	6.27	0.33	0.837	0.044	5.74	0.31	1.378	0.055	4.23	0.16	0.632	0.031	4.27	0.23	0.742	0.038	2.93	0.84	4.56	0.15	2.475	0.086	2.31	0.16	0.865	0.069	2.46	0.064
BTW11_47	209	10	492	22	510	26	0.35	0.04	337	15	1183	76	173.3	7.6	866	37	182.6	7.6	20.55	0.94	156.6	7.2	18.53	0.75	102	4.3	18.72	0.81	46	2.2	5.4	0.28	30.4	1.6	4.21	0.2	3.19	0.82	58.4	2.7	8.86	0.35	8.08	0.51	40.8	2.9	60.5	3
BTW11_48	350.5	5.5	300.5	6.5	902	18	0.789	0.099	209.1	4.2	783	10	129.3	2.8	723	14	184.3	4.5	37.67	0.81	188.7	4.6	24.82	0.64	155.2	3.2	31.55	0.63	89.8	1.5	12.57	0.27	84.5	1.8	13.83	0.25	21.8	2.6	34.81	0.99	22.21	0.8	22.5	1.1	8.3	0.3	38.37	0.76
BTW11_49	332	14	350	17	591	23	0.509	0.06	1011	47	2460	130	294	16	1134	46	184.3	7.5	59.1	2.6	143.5	6.1	16.92	0.79	101.3	4.3	19.67	0.81	56.2	2.7	7.76	0.39	47.3	2.3	7.23	0.29	2.41	0.75	32.5	1.3	6.76	0.27	8.21	0.4	33.4	1.7	26.9	1.3
BTW11_50	338.7	5.5	235	4.9	1081	32	21.3	4.5	19	3	62.6	8.4	10.16	0.91	60	3.2	28.1	1.1	8.49	0.28	56.2	1.6	13.54	0.42	131.3	4	35.5	1.1	116.9	4.3	15.97	0.53	84.3	3.1	10.26	0.32	8.6	1.7	10.76	0.3	8.79	0.21	9.45	0.33	17.16	0.99	5	0.16
BTW11_51	430	18	232	10	199.8	8.4	0.159	0.042	20.99	0.94	75.1	4.3	13.15	0.72	73.7	3.6	26	1	8.88	0.42	32.5	1.5	4.79	0.17	31.6	1	6.95	0.28	20.71	0.84	3.03	0.12	21.61	0.88	3.77	0.13	3.77	0.81	5.78	0.2	3.25	0.12	3.19	0.24	4.24	0.27	9.13	0.38
BTW11_52	454	17	236.4	8.6	578	25	0.278	0.033	541	22	1503	76	196.5	8.9	852	47	172.1	7.8	14.28	0.61	152.4	5.3	18.58	0.89	107.1	4.4	20.41	0.79	55	2.7	6.78	0.31	40.8	1.7	6.46	0.28	4.1	1.1	18.85	0.58	5.87	0.18	7.57	0.46	22.4	1.4	13.88	0.64
BTW11_53	432	15	174	6.6	1586	74	0.7	0.22	81.5	3.1	533	22	130.8	6.3	879	31	298	12	32.3	1.4	283	12	39.6	1.8	248	10	50	2.2	141.2	5.5	20.73	0.92	137.6	6	20.09	0.84	6.38	0.92	33.2	1.6	9.07	0.35	7	0.36	4.16	0.41	28.1	1.6
BTW11_54	1051	51	280	16	1022	57	0.133	0.038	38.7	1.7	142.4	7.7	24.1	1.1	136.7	6.8	58.9	2.4	11.91	0.47	117	4.7	24	1	198	8.3	36.3	1.8	74.6	3.3	6.71	0.33	27.7	1.1	2.94	0.11	10.3	1.7	14.17	0.56	9.7	0.39	9.28	0.41	0.6	0.062	16.04	0.6
BTW11_55	324	11	416	17	263	9.9	2.46	0.13	953	40	2330	110	250	12	1027	45	147.9	6.3	24.5	1	102.9	3.8	10.5	0.36	56.4	2.3	9.72	0.38	24.4	1.1	2.91	0.1	16.95	0.75	2.178	0.098	3.16	0.97	29.54	0.99	6.8	0.3	14.97	0.68	73	2.5	22.54	0.82
BTW11_56	719	29	277	11	649	26	3.2	2	22.28	0.9	82.1	3.9	14.91	0.58	85.4	3	35.6	1.4	12.13	0.5	60.8	2.3	11.72	0.49	89.6	3.5	22.34	0.86	71.1	2.8	9.85	0.45	63.2	2.3	10.17	0.39	2.86	0.91	5	0.23	3.36	0.13	3.25	0.24	0.145	0.024	7.11	0.27
BTW11_57	574	22	241	10	500	59	0.18	0.044	176	19	651	67	99	12	468	53	113	12	32.5	3.4	101	11	12.2	1.4	68.7	8.1	13.6	1.5	42	4.7	6.94	0.83	53.4	6.8	9.7	1.2	2.96	0.82	20.9	2.2	5.28	0.28	5.66	0.35	18.2	2.8	17.5	2.5
BTW11_58	277.8	7.7	673	29	304	11	0.364	0.038	426	18	1477	61	205	8.2	964	44	168.2	6	26.5	1.1	113.7	3.4	12.1	0.39	62.9	2.1	10.98	0.43	26.9	1.2	3.21	0.15	17.6	0.55	2.437	0.093	2.95	0.79	12.12	0.34	4.41	0.11	3.45	0.22	2.76	0.15	7.94	0.24
BTW11_59	541.9	7.7	259	3.3	647.6	9.3	0.265	0.046	31	1.7	135.1	7.5	25.6	1.5	153	11	50.7	2.8	17.17	0.28	68	2.9	12.01	0.41	90.1	2.5	22.06	0.5	71.5	1.7	9.81	0.23	62.1	1	10.68	0.24	5	1.2	9.5	0.2	5.09	0.14	4.98	0.25	0.586	0.049	12.39	0.2
BTW11_60	167.6	7	228.2	8.9	810	30	0.158	0.027	131.5	4.6	665	26	133.5	5.9	811	28	211.7	6	23.32	0.75	201.4	5.3	26.04	0.81	153.1	5	29.56	0.97	78.1	2.9	10.12	0.35	60.6	2.2	8.58	0.33	2	0.74	8.25	0.24	2.251	0.077	1.71	0.13	0.897	0.06	7.29	0.21
BTW11_61	286.9	9.6	198.9	7.7	794	32	0.141	0.023	424	17	1635	78	258.9	9.2	1086	41	215.6	9	9.07	0.36	178.7	6.4	22.66	0.86	141	4.9	27.9	1.3	79.9	3.1	11.18	0.41	70	2.4	9.91	0.39	4.4	1.1	19.3	0.7	6.43	0.32	6.79	0.37	14.19	0.81	14.08	0.39
BTW11_62	835	35	494	25	1276	52	0.744	0.07	35.2	1.6	149.3	7.6	28.6	1	186.3	8.2	84	2.5	12.29	0.47	138.9	5.1	25.86	0.96	197	7.3	46.2	1.5	157.6	5	25.8	1	178.4	7.8	27.9	1	3.46	0.75	7.35	0.27	3.72	0.15	3.47	0.22	1.32	0.15	15.4	0.53
BTW11_63	235.6	8.4	195.5	4.5	1028	23	1.6	1.1	51.3	1.5	285.8	6.8	68.3	1.8	487	11	171.7	4.8	37.36	0.98	204.2	4.4	27.19	0.73	168.2	4.3	35.73	0.84	98.5	2.7	13.38	0.3	85	1.9	14.68	0.4	10.3	1.6	50.2	1.5	15.67	0.51	14.24	0.55	19.04	0.47	36.45	0.94
BTW11_64	257	11	229.1	7.1	2144	76	0.247	0.036	119.7	4.8	748	39	174.8	5.5	1135	41	373.3	9.7	70.8	2	386	12	56.5	1.8	347	10	70.8	2.5	197.5	6.1	27.3	0.71	171.4	4.1	23.71	0.72	9.9	1.3	34.55	0.97	11.21	0.36	12.15	0.57	39.1	1.2	46.1	1.2
BTW11_65	440	16	211	9.6	879	94	0.94	0.61	15.6	1.3	70.4	5.9	14.4	1.1	96.6	7.6	51.6	4.9	15.1	1.2	82.2	6.7	15.5	1.4	122	12	29.1	2.8	96	10	13.6	1.4	85.8	9.8	13.8	1.5	3.54	0.96	14.2	1.5	4.98	0.21	4.24	0.22	3.66	0.43	9.9	1.5
BTW11_66	309.2	4.6	261	3.8	1109	59	0.98	0.12	1235	55	3450	150	422	22	1759	87	293	16	34.9	1.6	228	11	28.7	1.6	171.1	9.3	35	2	100.6	5.6	14.17	0.89	92.5	5.4	15.57	0.83	16.7	2.6	95.8	3.1	23.33	0.96	30.2	1.5	109.2	6.6	74.1	3
BTW11_67	339	11	5730	300	251	10	13.25	0.55	1306	48	2840	130	337	14	1373	52	208.5	7.2	44.5	1.5	135.2	4.7	12.73	0.38	56.4	1.4	8.7	0.27	18.84	0.66	2.117	0.096	10.51	0.4	1.307	0.045	2.36	0.74	5.3	0.15	2.648	0.08	4.23	0.22	53.2	2.2	11.32	0.28
BTW11_68	702	15	287.7	7.3	222.8	8.8	0.076	0.017	3.99	0.21	38	1.7	15.39	0.74	168.6	5.7	72.6	2.3	20.79	0.63	75.2	2.4	8.85	0.32	47.3	1.5	8.27	0.23	19.9	0.66	2.336	0.083	13.5	0.55	1.84	0.06	5.2	1.1	7.71	0.3	4.04	0.2	3.77	0.3	0.053	0.016	4	0.1
BTW11_69	394	15	264	8.2	509	28	0.27	0.036	675	30	1786	95	206	11	817	38	147.1	6.8	15.58	0.66	121.6	5.1	14.21	0.56	83.3	4.3	16.56	0.71	47.2	2.1	6.26	0.31	40.4	2.1	6.73	0.32	4.31	0.84	20.08	0.97	5.65	0.21	6.69	0.41	22.8	1.5	15.47	0.97
BTW11_70	467	19	378	15	620	21	0.26	0.033	236	10	851	39	126.3	7	628	27	122.4	4.1	24.73	0.88	114	4.9	13.78	0.61	85.3	3.4	18.26	0.62	55.1	2.4	8.36	0.34	59.6	2	11.13	0.4	3.21	0.81	31.2	1.4	6.5	0.38	6.23	0.42	21.92	0.97	28.52	0.9
BTW11_71	331	11	1125	40	192.4	7	0.049	0.013	8.47	0.37	44	1.6	9.78	0.31	72.6	3	31.7	1.3	7.91	0.33	40.7	1.7	5.63	0.19	33.8	1.2	6.62	0.25	17.58	0.64	2.227	0.089	12.38	0.37	1.736	0.065	3.41	0.85	3.48	0.14	3.37	0.12	3.27	0.24	0.098	0.015	0.502	0.025
BTW11_72	653	20	518	22	279	11	0.173	0.024	257	12	822	28	106.8	5.1	482	24	80.9	3.9	15.71	0.6	66.1	2.9	7.23	0.3	42.2	1.7	8.46	0.34	25.9	1.2	3.5	0.17	24.6	1.1	4.39	0.16	5.1	1.1	17.62	0.52	6.94	0.18	6.17	0.33	3.77	0.19	12.6	0.34
BTW11_73	296	13	179.7	7.5	3000	140	1.37	0.1	804	39	3600	170	650	36	3640	210	887	42	101.3	5.4	743	32	90.7	4.9	519	25	100.4	5	265	13	33.5	1.7	212	10	35	1.6	6.2	1.2	91.2	5	14.7	0.75	24.6	1.6	159	10	95.9	6.1
BTW11_74	484	12	284	10	2150	100	1.61	0.12	462	22	2260	150	400	23	2330	130	544	26	62.9	2.5	498	21	66.7	2.9	397	17	78	3	204.7	8	26.5	1.1	164	7.8	22.9	0.94	4.25	0.88	136.9	6	18.89	0.73	16.85	0.96	88.9	5.2	141.2	6.2
BTW11_75	470	19	330	12	823	48	0.548	0.065	9.83	0.76	35.8	2.1	5.84	0.31	35	2.1	18.07	0.93	24.2	1.3	35.5	1.9	8.52	0.4	83.7	5	26.4	1.3	108.4	6.6	19.1	1.1	135.9	7.8	22.28	0.99	4.27	0.89	6.22	0.24	3.35	0.13	3.42	0.22	1.88	0.17	10.69	0.33
BTW11_76	1462	54	288	11	1178	38	0.061	0.016	87.6	3.4	410	16	79.5	3.3	468	16	205	7	23.35	0.77	226.7	6.6	39.9	1.2	266.5	7.1	49.6	1.4	128.2	4.1	17.68	0.6	108.4	3.1	12.73	0.36	5.9	1.3	11.53	0.42	5.76	0.29	5.2	0.31	0.191	0.022	24.96	0.64
BTW11_77	572	20	228.1	7.8	286	41	0.152	0.03	194	24	577	71	75.2	9.5	349	42	73.4	9.1	25.8	2.8	62.5	8	7.19	0.96	40.9	5.4	8.1	1.1	24.1	3.2	3.51	0.53	25.5	3.4	4.68	0.69	4.51	0.93	23	3.2	6.25	0.46	6.14	0.57	16.2	3.2	19.2	3.4
BTW11_78	427	17	367	16	728	34	0.294	0.044	147.8	6	556	31	88.8	4.3	476	20	124.6	5.9	22.23	0.75	122.4	4.8	15.71	0.63	96	3.4	21.54	0.74	67.1	2.4	9.88	0.32	72.8	2.4	12.76	0.4	3.16	0.95	53.2	1.8	9.19	0.33	6.56	0.29	21.3	1.1	52	1.4
BTW11_79	504	19	441	13	328	12	0.96	0.082	726	23	1607	70	188.1	6	830	32	140.8	5.3	19.46	0.51	115.6	3.5	12.68	0.51	67.1	2.4	12.69	0.37	32.36	0.82	4.02	0.13	23.51	0.87	3.91	0.14	3.76	0.92	12.81	0.39	5.22	0.17	6.15	0.34	13.88	0.49	8.21	0.23
BTW11_80	694	26	314	13	386	12	0.485	0.05	25.3	1.2	97.9	3.3	20	1	118	4.2	45	1.8	10.23	0.35	56.7	2	8.57	0.36	58.3	1.9	12.77	0.45	38.4	1.4	5.44	0.23	37.2	1.2	6.8	0.22	4.53	0.91	8.12	0.28	3.76	0.13	3.61	0.22	2.83	0.13	18.19	0.48
BTW11_81	737	26	227.6	7.5	2153	90	0.082	0.019	28.5	1.4	116.4	6.2	23.6	1.2	169.2	8.5	90.5	4.1	6.68	0.25	174.7	7.4	37.2	1.4	305	13	74.5	3.4	232	11	35.8	1.3	220.8	9.4	30.1	1.4	3.51	0.96	6.63	0.2	3.38	0.18	3.1	0.22	1.13	0.077	13	1.1
BTW11_82	393	15	345	16	655	36	2.28	0.15	1448	72	3340	160	421	25	1689	92	272	13	14.28	0.58	205.1	8.3	23.35	0.96	127.2	5.8	23.3	1.2	55.9	2.7	6.52	0.28	33.9	1.5	4.44	0.2	4.4	1.1	9.35	0.37	4.54	0.2	5.6	0.36	12.12	0.55	5.14	0.21
BTW11_83	469	16	348	15	1644	64	1.2	0.1	873	40	3060	160	505	24	2430	130	476	19	39.4	1.8	393	18	50.4	2.9	304	13	59.9	2.8	156.3	7.3	21.02	0.89	124.4	5.9	17.22	0.88	4.4	1	83.2	6.1	13.54	0.97	12.8	1.4	56.4	5.4	72.3	4.6
BTW11_84	148	5	524	20	502	28	3.48	0.29	358	20	1095	54	177.3	8.7	858	45	192.8	8.9	33.1	2	154.6	6.4	18.01	0.89	102.4	6.1	18.13	0.79	45.2	2.3	5.79	0.33	32.3	1.6	4.51	0.23	4.6	1.2	15.4	1.1	5.24	0.79	8.51	0.94	32.4	2.4	11.26	0.52
BTW11_85	793	21	252.1	7.5	976	27	0.02	0.011	50.2	2	298	13	66.8	1.9	439	13	196.3	6.3	30.14	0.82	219.8	7.2	31.01	0.96	189.4	5.7	33.4	1.2	89.5	3.1	11.19	0.31	64.7	2.2	8.63	0.27	4.4	1	7.47	0.35	4.79	0.32	4.51	0.33	0.0203	0.0096	4.1	0.12
BTW11_86	1370	45	263.3	8	1207	49	0.0158	0.0073	72	3.2	249	10	43.2	1.8	247	9.9	94.5	3.5	10.2	0.4	138.3	3.5	27.6	1.1	207.3	7.7	44.5	1.7	131.8	4.6	18.72	0.63	113.1	4.4	14.72	0.54	5.8	1.1	10.21	0.4	7.09	0.29	7.17	0.4	0.957	0.06	12.27	0.38
BTW11_87	326.5	9.3	273.4	9.5	1422	50	0.435	0.055	707	25	2350	120	357	14	1638	54	343	11	19.79	0.72	293	11	36.6	1.1	213.9	6.7	42.2	1.4	121.3	2.9	17.96	0.59	122	3.6	18.72	0.44	3.62	0.92	39.1	1.3	7.04	0.26	10.4	0.46	51.1	1.9	33.86	0.88
BTW11_88	440	16	587	23	147	4.6	1.51	0.11	2259	81	3060	87	201.9	7.6	614	20	71.5	2.2	17.38	0.58	49.7	1.5	5.02	0.15	25.72	0.9	4.92	0.15	13.11	0.45	1.777	0.073	11.86	0.4	2.148	0.072	7	1.3	14.09	0.37	7.9	0.22	10.52	0.5	89.3	3	26.73	0.55
BTW11_89	327.6	9.8	419	13	1393	52	0.845	0.07	2118	90	4990	200	630	25	2700	120	453	18	71.7	3.1	342	13	41.4	1.5	233.6	9.6	45	1.7	124.1	5.1	17.46	0.82	111.3	4.6	17.79	0.69	4.3	1	97.9	3.8	14.21	0.52	22.13	0.93	132.8	6.1	93	3.8
BTW11_90	896	32	209.2	6.9	934	37	0.138	0.027	262	13	836	44	119.3	6.1	588	31	141.2	6.8	23.39	0.9	140.4	5.8	17.58	0.74	113.1	4.3	25.6	1.1	81.4	3.8	12.72	0.62	100.4	5.2	19.33	0.88	4.2	1	23	1.3	6.81	0.21	6.85	0.32	15.4	1.2	18.3	1.1
BTW11_91	402	13	259	11	380	12	0.039	0.015	3.43	0.16	19.89	0.86	5.37	0.18	51.8	2.2	39.2	1.3	12.48	0.42	71.6	2.3	10.82	0.34	67.1	2	12.9	0.42	36.5	1.2	4.79	0.16	30.6	1	4.78	0.16	1.23	0.42	14.68	0.41	2.341	0.069	0.784	0.067	0.11	0.021	14.27	0.45
BTW11_92	512	18	315	13	1142	43	1.26	0.13	1168	50	3200	140	413	19	1883	77	327	14	59.7	2.4	266	10	33.7	1.2	195.3	8.3	38.7	1.5	109.6	4.1	15.2	0.51	90.8	3.2	13.31	0.42	2.69	0.79	49.2	1.4	8.51	0.2	11.15	0.56	52.4	1.7	42.4	1.3
BTW11_93	869	29	357	17	894	26	0.237	0.024	11.6	0.52	40.7	1.8	6.42	0.33	38.3	1.8	18.24	0.82	11.91	0.46	33.5	1.3	8.2	0.23	88	2.3	27.79	0.92	125.9	4.5	25.88	0.81	208.5	7.4	33.7	1	4.5	1	7.71	0.3	5.57	0.22	5.73	0.31	0.217	0.034	7.58	0.28
BTW11_94	237.8	8.3	436	20	545	21	37	21	514	22	1636	88	232	12	1009	44	199.9	7.4	33.8	1.5	163.9	6.1	18.61	0.64	103.5	3.5	19.79	0.65	48.1	1.5	6.31	0.22	37.6	1.4	5.17	0.2	3.03	0.77	47.3	1.6	8.57	0.3	7.77	0.43	31.27	0.93	43.7	1.2
BTW11_95	431	15	188.2	7.6	2730	150	0.298	0.039	170	11	1126	70	257	16	1569	84	476	27	21.47	0.99	468	25	68.6	4	442	23	90.4	4.9	260	14	37.2	2	227	12	31.4	1.9	3.55	0.91	43.1	2.8	7.32	0.35	6.16	0.47	22.8	2.8	43.2	3.2
BTW11_96	557	26	212	9.1	1150	45	0.062	0.016	4.08	0.25	15.36	0.86	2.97	0.15	19.84	0.96	11.86	0.6	15.51	0.78	31.1	1.4	8.81	0.42	100.1	3.8	35.5	1.6	165	6.8	32.9	1.3	258.3	9.8	39.9	1.4	3.28	0.72	5.14	0.22	2.89	0.12	2.88	0.17	0.275	0.037	8.28	0.34
BTW11_97	372.6	9.5	413	13	482	20	0.425	0.049	443	18	1257	65	155.8	6.3	711	27	125	5.2	31.42	0.95	98.6	3.5	11.6	0.35	67.9	2.6	14.14	0.51	41.4	1.6	6.01	0.26	41.4	1.5	7.61	0.33	3.25	0.76	53.4	1.5	9.38	0.24	8.26	0.33	33.9	1.8	51.2	1.4
BTW11_98	593	24	393	18	977	46	0.09	0.021	153.4	5.7	541	27	96.5	5	578	27	226	10	19.41	0.69	255	11	36.5	1.5	196.7	7	33.3	1.2	78	3.5	9.11	0.43	49.7	1.7	5.71	0.22	6.9	1.1	10.59	0.47	7	0.34	6.85	0.49	2.23	0.3	3.43	0.19
BTW11_99	423	15	266	12	995	47	0.245	0.03	782	31	2350	110	325	13	1450	66	261.4	9.9	30.9	1.4	219	8.9	29.4	1.1	172.6	5.5	33.6	1.1	98.5	4.2	12.78	0.53	75.7	3.4	10.18	0.42	8.5	1.6	14.44	0.57	7.38	0.27	7.89	0.36	10.1	0.58	7.23	0.55
BTW11_100	518	22	594	25	55.2	2.7	0.053	0.015	14.75	0.74	105.2	5.1	25.3	1.3	164.9	9.4	32.6	1.5	8.46	0.32	23.36	0.72	2.301	0.09	11.99	0.57	2.013	0.069	5.04	0.19	0.62	0.033	3.17	0.15	0.505	0.029	2.59	0.68	2.67	0.11	2.119	0.077	2.05	0.15	0.0071	0.0045	0.918	0.034
BTW11_101	346	15	393	18	1065	49	1.025	0.075	183.3	9.4	1076	61	207	10	1092	61	268	12	14.71	0.6	224	11	30.1	1.1	186.5	7.8	35.9	1.5	102.4	4.3	14.42	0.67	90.4	3.9	12.97	0.56	6	1.1	19.02	0.87	7.05	0.35	8.17	0.54	19.7	1.1	15.58	0.66
BTW11_102	505	21	142.6	5.2	858	39	0.472	0.082	169.4	8	658	36	97.6	4.8	511	26	144.2	6.9	18.71	0.85	147.9	7.1	20.26	0.67	126.5	5.3	26.4	1.2	75	3.3	10.71	0.4	69.5	3	11.77	0.45	3.7	1	24.83	0.98	6.12	0.2	6.54	0.32	21	1.2	21.2	1.1
BTW11_103	134.1	3.3	331.8	8.7	458	13	0.027	0.012	68.4	1.7	263.6	6.9	50.1	1.5	320.7	9.3	146.8	4.7	16.94	0.39	235	5	40.78	0.92	179.7	4.2	14.21	0.3	13.27	0.38	0.705	0.034	2.44	0.14	0.24	0.014	11.4	1.7	17.35	0.4	11.59	0.22	11.19	0.49	0.737	0.055	20.54	0.47
BTW11_104	335	14	1707	84	398	19	3.66	0.16	1515	58	3440	170	404	20	1647	63	228	10	29.7	1.3	154.9	7.3	17.03	0.77	84.9	3.2	14.78	0.57	35.6	1.5	4.1	0.17	21.05	0.84	2.71	0.1	4.5	1.1	7.03	0.29	4.5	0.2	5.3	0.32	35.1	1.6	12.25	0.51
BTW11_105	703	24	244.8	9	924	36	0.139	0.029	10.73	0.5	41.4	1.9	7.97	0.39	55.6	2.4	30	1	4.25	0.19	60	2.3	12.71	0.4	120.9	3.5	31.22	0.99	115	3.9	17.74	0.63	122.8	3.7	20.73	0.68	3.13	0.79	4.6	0.16	2.9	0.1	2.83	0.18	0.301	0.035	6.85	0.19
BTW11_106	276.7	9	469	16	894	56	0.704	0.063	1143	53	2990	160	345	18	1464	84	263	15	34.9	2.2	204	12	25.1	1.6	148.9	8.9	28.3	1.5	81.2	5.5	11.54	0.78	76.1	5	12.22	0.84	2.33	0.72	63.4	3.3	9.64	0.47	14.7	0.8	78	4.3	58.9	2.9
BTW11_107	485	14	373	10	189.1	6.2	0.538	0.049	657	20	1080	41	92.4	2.6	353.5	8.8	50.3	1.3	10.44	0.32	41.9	1.3	4.9	0.16	27.94	0.83	6.06	0.17	18.05	0.64	2.553	0.095	19.33	0.62	3.75	0.15	14	2	50.2	1.1	18.16	0.36	18.13	0.59	26.34	0.81	32.8	0.78
BTW11_108	944	32	390	17	261.8	9.3	0.447	0.041	1406	64	2600	120	221.3	9.3	733	36	87.1	3.3	13.61	0.51	64.1	2.4	7.39	0.26	41.1	1.6	8.18	0.35	23.51	0.95	3.26	0.12	21	1.1	3.26	0.13	3.53	0.93	6.79	0.28	4.51	0.15	5.38	0.24	33.6	1.6	10.84	0.39
BTW11_109	542	19	306.7	9.2	1063	42	0.0158	0.008	1.75	0.1	7.52	0.58	1.44	0.12	10.98	0.6	9.36	0.52	8.22	0.44	40.1	1.8	11.31	0.49	119.7	5.8	34.8	1.7	126.7	5.2	20.2	1.1	126.7	6.4	17.79	0.69	3.7	1	5.99	0.23	4.16	0.13	3.85	0.2	0.137	0.027	6.99	0.49
BTW11_110	363	12	249.7	7.2	2173	52	1.628	0.078	984	36	3830	140	626	22	2956	96	618	19	66.8	1.5	513	13	66.1	2	400	11	75.9	1.9	207.5	5.5	26.7	0.71	158.6	5.3	22.59	0.54	3.65	0.9	42.9	1.3	6.87	0.2	7.21	0.32	38.5	2.1	50.27	0.95
BTW11_111	1579	40	278.1	6.8	998	30	0.03	0.011	73.6	1.8	286.4	9	51.4	1.2	298.8	8.3	112.9	2.9	14.76	0.41	149.9	4.5	27.35	0.75	192.7	4.8	37.16	0.89	95.5	3.1	12.63	0.33	70.2	2.3	8.63	0.26	9.7	1.3	12.72	0.29	9.96	0.23	10.33	0.47	1.11	0.085	8.31	0.2
BTW11_112	261	11	387	16	1037	44	0.115	0.025	268.9	9.8	1361	56	248	12	1304	47	283	10	35.7	1.2	235.2	7.5	29.2	1	169	5.7	33.35	0.97	96.9	3.3	12.83	0.42	82.6	3	12.48	0.35	6.9	1.1	11.38	0.44	6.74	0.26	7.25	0.37	8.17	0.45	5.37	0.22
BTW11_113	332	10	227.7	7.8	1141	31	0.097	0.019	64.5	2.3	432	16	102.8	4	708	25	241	6.7	22.64	0.58	246.5	7.9	32.6	1	200.2	7.4	40.4	1.3	107.1	4.4	14.13	0.49	84	2.4	12.94	0.39	4.6	1.1	20.17	0.47	6.29	0.18	4.69	0.18	1.076	0.071	16.31	0.48
BTW11_114	79.5	5.3	371	21	1181	57	130	150	49.6	4.1	185	21	37.1	3.4	242	13	127.2	7.7	17.7	1.1	250	14	47.5	3.6	297	20	47.1	2.4	98.7	8.2	9.34	0.82	44.7	3.4	5.32	0.44	15	3.5	19	1.1	14.4	1.1	15.3	1.5	1.62	0.45	16	1.2
BTW11_115	47.9	1.7	443	21	235	10	0.07	0.018	27.8	1.6	98.3	5.2	19.25	0.88	116.6	5.3	55.1	2.5	10.99	0.41	96.5	3.6	14.45	0.57	70.8	2.2	9.06	0.3	14	0.52	1.484	0.064	8.17	0.35	1.191	0.046	13	1.9	15.12	0.57	12.05	0.55	12.22	0.79	0.281	0.041	7.83	0.29

## Sheet: Apatite SVM prediction
Table 5. Trace elements in apatite with age SVM prediction, Mullaghmore Sandstone fm.
Grain	Lithology	LREE	Sr/Y	Age (Ma)	Age error (Ma)	SVM Prediction
Sample 1	Location 1: Bunatrahir West			Grid Coordinates: 54°18'31.6''N, -9°23'35.6''W
Grain	Lithology	LREE	Sr/Y	Age	SVM prediction
BTW02-1	Sand	3061	0.0731266	1196.03	HM
BTW02-10	Sand	2630	0.263492	1798.93	HM
BTW02-100	Sand	206.97	7.18069	0	LM
BTW02-101	Sand	2948.2	0.309091	1643.16	I+M
BTW02-102	Sand	2162.7	2.07239	1757.7	I+M
BTW02-103	Sand	1417	0.21547	1788.26	HM
BTW02-104	Sand	2883.2	0.194079	1663.95	HM
BTW02-105	Sand	493.2	2.3013	987.077	LM
BTW02-106	Sand	6629	0.0732922	1491.66	S
BTW02-107	Sand	4361	0.295688	1740.54	I+M
BTW02-108	Sand	3068.6	2.11065	1754.7	I+M
BTW02-109	Sand	818.1	0.476529	1656.12	HM
BTW02-11	Sand	2781.2	1	1796.29	I+M
BTW02-110	Sand	3300.4	2.32331	1950.97	I+M
BTW02-111	Sand	10531	0.0637309	1490.67	S
BTW02-112	Sand	1763.6	1.66146	1853.65	I+M
BTW02-113	Sand	1474.5	3.55484	1627.83	I+M
BTW02-12	Sand	1906.9	0.10974	1554.26	HM
BTW02-13	Sand	2680.1	0.882828	1667.48	I+M
BTW02-14	Sand	2580.2	0.779412	1569.3	I+M
BTW02-15	Sand	3314.2	0.675048	1604.81	I+M
BTW02-16	Sand	2566.6	0.232505	1613.46	HM
BTW02-17	Sand	3304.9	0.413889	2926.17	I+M
BTW02-18	Sand	5823	0.339906	1495.26	I+M
BTW02-19	Sand	7766	0.126956	1214.34	I+M
BTW02-2	Sand	4706	0.922813	1712.38	I+M
BTW02-20	Sand	4279	0.209022	1517.32	I+M
BTW02-21	Sand	1901.9	0.319149	1636.22	HM
BTW02-22	Sand	4294	0.123324	1549.55	I+M
BTW02-23	Sand	5164.8	0.476533	2266.95	I+M
BTW02-24	Sand	3318	0.208129	1640.47	I+M
BTW02-25	Sand	6308	0.776184	1846.56	I+M
BTW02-26	Sand	1158.8	3.79649	1831.86	I+M
BTW02-28	Sand	1831	0.387887	1597.52	HM
BTW02-29	Sand	5318	0.122764	1524.07	I+M
BTW02-3	Sand	3883.9	5.8542	437.77	I+M
BTW02-30	Sand	4694	0.064718	1600.88	S
BTW02-31	Sand	1073.6	1.54739	1731.82	I+M
BTW02-32	Sand	3026.2	0.417107	2729.75	I+M
BTW02-33	Sand	3651.5	0.192009	1712.52	I+M
BTW02-34	Sand	3528.4	0.235189	1602.84	I+M
BTW02-35	Sand	1694	0.987143	1755.03	I+M
BTW02-36	Sand	4760	0.259478	1449.27	I+M
BTW02-37	Sand	5208	1.57962	1830.15	I+M
BTW02-38	Sand	2421.9	1.47619	3299.76	I+M
BTW02-39	Sand	7545	0.0814486	1627.59	I+M
BTW02-4	Sand	12162	0.0716472	1446.79	I+M
BTW02-40	Sand	1828	1.07831	1175.54	I+M
BTW02-41	Sand	4203	0.202842	1681.81	I+M
BTW02-42	Sand	2222	0.27291	1862.63	HM
BTW02-43	Sand	1711.7	0.457704	1620.55	HM
BTW02-44	Sand	2035	0.830986	1348.16	I+M
BTW02-45	Sand	2397	2.70215	1680.3	I+M
BTW02-46	Sand	5536	0.163105	1738.27	I+M
BTW02-47	Sand	2585.2	1.79865	1875.5	I+M
BTW02-48	Sand	2309.6	6.3234	N/A	I+M
BTW02-49	Sand	3687	0.147035	1406.3	HM
BTW02-5	Sand	2044	0.10521	1622.25	HM
BTW02-50	Sand	3715.8	2.91327	2015.93	I+M
BTW02-51	Sand	2156.2	1.06267	1560.57	I+M
BTW02-52	Sand	1747.2	0.909747	1775.01	I+M
BTW02-53	Sand	3161.2	0.483696	1517.42	I+M
BTW02-54	Sand	2534.1	0.880228	1804.39	I+M
BTW02-55	Sand	2244.8	5.99184	1711.97	I+M
BTW02-56	Sand	3771	0.274949	1579.43	I+M
BTW02-57	Sand	3439	0.526259	1239.77	I+M
BTW02-58	Sand	2864	0.502294	1389.42	I+M
BTW02-59	Sand	2794.9	0.368201	1731.06	I+M
BTW02-6	Sand	3943	0.337424	1651.45	I+M
BTW02-60	Sand	1894.7	1.29614	1317.87	I+M
BTW02-61	Sand	3750	1.28834	1848.67	I+M
BTW02-62	Sand	3379.3	2.84916	998.351	I+M
BTW02-63	Sand	3323	0.176466	1690.53	HM
BTW02-64	Sand	5524	0.192547	1522.86	I+M
BTW02-65	Sand	795.2	2.98276	1678.95	LM
BTW02-66	Sand	6143	0.262545	1286.76	I+M
BTW02-68	Sand	2447.8	0.47561	N	I+M
BTW02-69	Sand	10900	0.0531437	1538.37	S
BTW02-7	Sand	3512.8	0.168132	1151.55	HM
BTW02-70	Sand	3667.2	0.468801	1775.65	I+M
BTW02-71	Sand	1984	0.399474	1597.12	HM
BTW02-72	Sand	3581	0.168095	1567.56	I+M
BTW02-73	Sand	2146	0.582569	1589.39	I+M
BTW02-74	Sand	2269.5	0.430034	1494.85	I+M
BTW02-75	Sand	3156	0.379838	1599.78	I+M
BTW02-76	Sand	3590.8	0.268953	1619.17	I+M
BTW02-77	Sand	2451.8	1.15769	1259.69	I+M
BTW02-78	Sand	4408.3	0.18683	1757.77	I+M
BTW02-79	Sand	1040.1	6.60535	1702.91	UM
BTW02-8	Sand	3708	0.211397	1616.8	I+M
BTW02-80	Sand	1405.7	0.516052	1490.21	HM
BTW02-81	Sand	13916	0.109019	1617.6	I+M
BTW02-82	Sand	2838.2	0.150629	1611.82	HM
BTW02-83	Sand	2359.4	2.45223	1724.83	I+M
BTW02-84	Sand	6654	0.168399	1551.39	I+M
BTW02-85	Sand	2255.3	0.156407	1533.67	HM
BTW02-86	Sand	672.1	1.2149	1686.39	LM
BTW02-87	Sand	2214.5	0.333982	1405.88	HM
BTW02-88	Sand	2795.2	1.15909	312.521	I+M
BTW02-89	Sand	7269	0.0792241	1677.99	I+M
BTW02-9	Sand	4311.7	0.13752	1712.4	I+M
BTW02-90	Sand	4452	0.199595	1559.17	I+M
BTW02-91	Sand	2786.1	0.506339	1647.32	I+M
BTW02-92	Sand	3791	0.521797	1553.84	I+M
BTW02-93	Sand	2833.2	0.486333	1391.14	I+M
BTW02-94	Sand	5645.3	0.589409	1724.89	I+M
BTW02-95	Sand	4367	9.7243	402.953	UM
BTW02-96	Sand	4831.5	0.123707	1550.12	I+M
BTW02-97	Sand	2847.9	0.522034	1495.77	I+M
BTW02-98	Sand	2448.7	0.843694	1755.92	I+M
BTW02-99	Sand	4193	1.86884	1805.18	I+M
Sample 2
Grain	Lithology	LREE	Sr/Y	Age	SVM prediction
BTW05-1	Sand	81.88	3.125	1796.84	LM
BTW05-10	Sand	382.2	1.0911	1737.85	LM
BTW05-11	Sand	287.95	2.63465	1820.24	LM
BTW05-12	Sand	5140.6	4.61876	445.979	I+M
BTW05-13	Sand	539.7	1.63989	1055.27	LM
BTW05-14	Sand	366.2	1.61867	1618.03	LM
BTW05-15	Sand	369.3	4.92507	N/A	LM
BTW05-16	Sand	8186	0.0515335	1539.77	S
BTW05-17	Sand	145.23	0.535028	548.638	LM
BTW05-18	Sand	536.6	0.374558	489.401	LM
BTW05-2	Sand	592.8	0.0376016	429.946	HM
BTW05-20	Sand	521.7	0.371429	418.193	LM
BTW05-21	Sand	5702	0.241803	1821.91	I+M
BTW05-22	Sand	5.432	4.31373	1680.29	LM
BTW05-23	Sand	767.9	0.371595	504.94	HM
BTW05-24	Sand	349.3	6.84492	1534.33	LM
BTW05-25	Sand	382	28.6807	1613.37	UM
BTW05-27	Sand	270.05	0.0812593	457.845	LM
BTW05-28	Sand	317.1	3.0007	N/A	LM
BTW05-29	Sand	2267.1	0.850214	1181.16	I+M
BTW05-30	Sand	256.01	0.118546	430.872	LM
BTW05-31	Sand	118.77	0.279781	1064.12	LM
BTW05-32	Sand	3015	0.0918462	1695.74	HM
BTW05-33	Sand	76.21	8.10256	1202.25	LM
BTW05-34	Sand	26.556	0.357769	533.691	LM
BTW05-36	Sand	674.8	1.12199	495.765	LM
BTW05-37	Sand	3252.5	0.132419	1661.57	HM
BTW05-38	Sand	356	0.791467	1158.42	LM
BTW05-39	Sand	76.85	0.404568	461.529	LM
BTW05-4	Sand	608.4	0.312241	458.173	LM
BTW05-40	Sand	93.06	3.39411	1595.42	LM
BTW05-41	Sand	3501.6	3.17647	1814.9	I+M
BTW05-42	Sand	85.62	18.8235	1712.58	LM
BTW05-44	Sand	171.96	1.40343	1625.57	LM
BTW05-45	Sand	1916.2	4.3004	427.751	I+M
BTW05-46	Sand	4911	1.04677	1502.97	I+M
BTW05-47	Sand	632.2	1.07895	1734.7	LM
BTW05-48	Sand	207.79	0.307559	548.443	LM
BTW05-49	Sand	377.3	0.169369	1057.17	LM
BTW05-5	Sand	2317.5	0.373102	1513.71	I+M
BTW05-50	Sand	2479.5	10.9341	397.883	UM
BTW05-51	Sand	207.59	0.376923	484.473	LM
BTW05-52	Sand	464.85	1.99706	1328.32	LM
BTW05-53	Sand	173.07	0.758315	468.383	LM
BTW05-54	Sand	1715.3	0.150445	1073.78	HM
BTW05-55	Sand	735.9	1.6305	1231.27	LM
BTW05-56	Sand	67.8	1.72573	1822.78	LM
BTW05-58	Sand	386.9	0.44533	1589.24	LM
BTW05-59	Sand	1624.4	0.317653	1736.27	HM
BTW05-6	Sand	1990.8	2.28571	1392.69	I+M
BTW05-60	Sand	365.8	2.45825	1209.87	LM
BTW05-61	Sand	626.3	0.254333	1053.42	LM
BTW05-63	Sand	4553.1	0.27831	1615.17	I+M
BTW05-64	Sand	850.3	0.136803	489.596	HM
BTW05-65	Sand	1212.8	0.309175	524.982	HM
BTW05-67	Sand	5486	0.624714	1127.08	I+M
BTW05-68	Sand	2323.1	0.604938	1813.45	I+M
BTW05-69	Sand	142.94	0.530051	1287.24	LM
BTW05-7	Sand	51.09	3.07195	428.939	LM
BTW05-70	Sand	145.19	7.40621	1851.76	LM
BTW05-71	Sand	78.34	0.873786	1269.5	LM
BTW05-72	Sand	141.73	0.783287	1631.16	LM
BTW05-73	Sand	137.42	0.386732	467.546	LM
BTW05-74	Sand	3319	0.0216608	416.577	S
BTW05-75	Sand	2571.2	1.21092	950.026	I+M
BTW05-76	Sand	133.06	7.1863	436.543	LM
BTW05-77	Sand	2913.4	0.613718	1347.06	I+M
BTW05-78	Sand	2154.5	0.10119	417.861	HM
BTW05-79	Sand	223.05	0.163707	460.33	LM
BTW05-8	Sand	1189.5	0.202294	464.559	HM
BTW05-80	Sand	4155	0.184495	1417.15	I+M
BTW05-81	Sand	1220.2	0.432472	1615.5	HM
BTW05-82	Sand	7289	0.147498	1515.15	I+M
BTW05-83	Sand	1325.9	0.365798	1636.54	HM
BTW05-84	Sand	1760.6	7.64526	1711.59	UM
BTW05-85	Sand	664.2	0.422515	493.903	LM
BTW05-86	Sand	3204	4.48337	1076	I+M
BTW05-87	Sand	611.4	0.309524	460.628	LM
BTW05-88	Sand	74.83	1.10774	472.735	LM
BTW05-89	Sand	1749.9	0.867012	1409.74	I+M
BTW05-9	Sand	1454.65	1.10285	1387.11	I+M
BTW05-90	Sand	117.43	0.848331	N/A	LM
BTW05-91	Sand	3484	0.226109	1522.2	I+M
BTW05-92	Sand	961.4	2.24072	1168.79	I+M
BTW05-93	Sand	1547.8	0.503556	1600.06	HM
BTW05-94	Sand	536.1	0.37395	1240.52	LM
BTW05-95	Sand	1085.2	3.22028	1846.07	I+M
BTW05-96	Sand	829.4	4.59615	1411.84	LM
BTW05-97	Sand	1118	0.821639	1068.28	HM
BTW05-98	Sand	170.67	0.281923	481.722	LM
Sample 3
Grain	Lithology	LREE	Sr/Y	Age	SVM prediction
BTW6b_1	Sand	2903.8	0.547404	N/A	I+M
BTW6b_10	Sand	2391.5	0.197366	1442.41	HM
BTW6b_100	Sand	918.7	2.64067	1677.3	I+M
BTW6b_101	Sand	7263.9	0.105485	1577.58	I+M
BTW6b_102	Sand	469.8	3.31679	1552.26	LM
BTW6b_103	Sand	475.31	4.53869	1581.58	LM
BTW6b_104	Sand	1891.1	1.14727	1648.94	I+M
BTW6b_105	Sand	2483.1	1.27717	1603.31	I+M
BTW6b_106	Sand	2298.6	0.82029	1374.65	I+M
BTW6b_107	Sand	1487.8	1.19099	1638.93	I+M
BTW6b_108	Sand	1221.3	0.234294	1530.51	HM
BTW6b_109	Sand	1753.4	0.222142	1105.26	HM
BTW6b_11	Sand	823.8	2.39122	N/A	LM
BTW6b_110	Sand	3057.6	0.436069	1342.87	I+M
BTW6b_111	Sand	4573.6	7.5322	413.659	UM
BTW6b_112	Sand	2645.5	0.18221	1543.64	HM
BTW6b_113	Sand	5492	0.872857	1172.74	I+M
BTW6b_114	Sand	6632	0.0954944	1540.87	I+M
BTW6b_115	Sand	3434.1	0.37384	1634.51	I+M
BTW6b_116	Sand	3338.5	1.65372	1716.16	I+M
BTW6b_117	Sand	3125.6	0.47678	1318.54	I+M
BTW6b_118	Sand	200.33	1.34886	1469.55	LM
BTW6b_119	Sand	1157.5	0.544236	1558.01	HM
BTW6b_12	Sand	875.1	0.569953	1789.7	HM
BTW6b_120	Sand	4786.6	0.225946	1630.8	I+M
BTW6b_121	Sand	2420.4	4.4546	1662.53	I+M
BTW6b_122	Sand	3751.6	0.407143	1397.84	I+M
BTW6b_123	Sand	1110	0.344006	1692.35	HM
BTW6b_13	Sand	2568.9	5.17622	1761.94	I+M
BTW6b_14	Sand	1133.8	0.0734256	1451.35	HM
BTW6b_15	Sand	2106.7	0.263481	1678.74	HM
BTW6b_16	Sand	10276	0.194118	1840.62	I+M
BTW6b_17	Sand	1785.9	0.189765	418.966	HM
BTW6b_18	Sand	4001.5	1.34371	1617.39	I+M
BTW6b_19	Sand	4041.1	2.00447	1715.3	I+M
BTW6b_2	Sand	7291	0.223395	1698	I+M
BTW6b_20	Sand	4444.8	1.70782	1697.35	I+M
BTW6b_21	Sand	3437.7	3.63078	1676.43	I+M
BTW6b_22	Sand	2425	5.52124	1386.67	I+M
BTW6b_23	Sand	2873.5	0.299252	1537.53	I+M
BTW6b_24	Sand	3531	0.475273	1633.46	I+M
BTW6b_25	Sand	2895.7	0.691044	1736.13	I+M
BTW6b_26	Sand	770.3	0.532905	444.561	LM
BTW6b_27	Sand	1973.7	0.24642	1617.23	HM
BTW6b_28	Sand	1285.9	0.797423	1747.82	I+M
BTW6b_29	Sand	3565.1	0.236393	1378.28	I+M
BTW6b_3	Sand	3364.3	0.329753	1691.71	I+M
BTW6b_30	Sand	2492.5	0.62454	N/A	I+M
BTW6b_31	Sand	2775	1.1247	1281.9	I+M
BTW6b_32	Sand	8227	0.0603443	1456.93	S
BTW6b_33	Sand	6106	0.167662	1585.09	I+M
BTW6b_34	Sand	113.88	7.73998	1988.1	LM
BTW6b_35	Sand	746.4	1.45843	N/A	LM
BTW6b_36	Sand	13.619	1.66892	1839.55	LM
BTW6b_37	Sand	3080.9	0.118657	1730.07	HM
BTW6b_38	Sand	903.3	1.07494	1564.31	LM
BTW6b_39	Sand	7870	0.345648	1678.82	I+M
BTW6b_4	Sand	2347.5	1.99242	1954.87	I+M
BTW6b_40	Sand	4084.9	0.72093	1849.22	I+M
BTW6b_41	Sand	2036.8	1.61299	1477.55	I+M
BTW6b_42	Sand	4248.8	0.0588889	634.988	S
BTW6b_44	Sand	906.9	0.15227	1581.63	HM
BTW6b_45	Sand	49.68	0.576385	N/A	LM
BTW6b_46	Sand	2954	0.176965	1613.11	HM
BTW6b_47	Sand	12.976	1.34194	1782.82	LM
BTW6b_48	Sand	6665	0.580994	1727.14	I+M
BTW6b_49	Sand	3096.4	0.204651	1552.41	HM
BTW6b_5	Sand	3281.9	0.50105	1301.97	I+M
BTW6b_50	Sand	396.7	0.196657	N/A	LM
BTW6b_51	Sand	6071	0.391165	1863.69	I+M
BTW6b_52	Sand	1651.1	0.962395	1186.24	I+M
BTW6b_53	Sand	3333.6	0.143515	1623.85	HM
BTW6b_54	Sand	1669.6	0.420625	1477.88	HM
BTW6b_55	Sand	10143	0.0763071	1592.93	I+M
BTW6b_56	Sand	4284.5	0.0966825	1408.91	HM
BTW6b_57	Sand	1066.5	11.3889	1959.07	UM
BTW6b_58	Sand	4070	0.382309	1796.12	I+M
BTW6b_59	Sand	2536.3	0.792261	1682.49	I+M
BTW6b_6	Sand	4226	0.0868482	1610.97	HM
BTW6b_60	Sand	123.56	0.802395	N/A	LM
BTW6b_61	Sand	1693.9	0.949343	N/A	I+M
BTW6b_62	Sand	2656.3	4.98623	1767.4	I+M
BTW6b_63	Sand	1907	1.1373	N/A	I+M
BTW6b_64	Sand	2523.8	1.53603	1518.95	I+M
BTW6b_65	Sand	504.9	0.231907	1620.14	LM
BTW6b_66	Sand	214.44	4.53925	N/A	LM
BTW6b_67	Sand	437.04	7.05497	1624.64	LM
BTW6b_68	Sand	2455.4	0.214693	1720.22	HM
BTW6b_69	Sand	779.7	1.57343	1756.6	LM
BTW6b_7	Sand	1813	0.563533	N/A	I+M
BTW6b_70	Sand	1460.5	7.25231	N/A	UM
BTW6b_71	Sand	403	0.845217	1702.71	LM
BTW6b_72	Sand	10140	0.108381	1464.32	I+M
BTW6b_73	Sand	4346	0.0858087	1570.49	HM
BTW6b_74	Sand	462.37	1.86436	N/A	LM
BTW6b_75	Sand	4703.1	1.06656	1960.69	I+M
BTW6b_76	Sand	3213	2.83417	1839.7	I+M
BTW6b_77	Sand	2162.3	0.347166	1722.17	HM
BTW6b_78	Sand	3723	0.591528	1502.99	I+M
BTW6b_79	Sand	4314.6	0.262831	1624.98	I+M
BTW6b_8	Sand	2054.8	0.762763	N/A	I+M
BTW6b_80	Sand	2977.7	0.548303	1640.59	I+M
BTW6b_82	Sand	2307	0.444169	1631.01	I+M
BTW6b_83	Sand	1095.3	0.91275	1649.71	I+M
BTW6b_84	Sand	1783.9	0.218077	1538.33	HM
BTW6b_85	Sand	2103.5	0.709524	1566.57	I+M
BTW6b_86	Sand	320.74	3.40224	1685.91	LM
BTW6b_87	Sand	1957.3	0.342466	1694.37	HM
BTW6b_88	Sand	8164	0.286634	1500.25	I+M
BTW6b_89	Sand	2157.2	1.05285	1606.86	I+M
BTW6b_9	Sand	3862.1	0.627297	1808.72	I+M
BTW6b_91	Sand	3271.1	1.56203	1547.01	I+M
BTW6b_92	Sand	2495.1	0.653435	1782.36	I+M
BTW6b_93	Sand	1020.3	0.186481	1684.02	HM
BTW6b_94	Sand	2418.7	0.734472	1684.12	I+M
BTW6b_95	Sand	735.1	0.24793	1136.83	HM
BTW6b_96	Sand	2235	8.47968	1646.51	UM
BTW6b_97	Sand	6578	0.06	2253.78	S
BTW6b_98	Sand	788.8	0.281671	1578.88	HM
BTW6b_99	Sand	2332.6	0.73489	1461.85	I+M
Sample 4
Grain	Lithology	LREE	Sr/Y	Age	SVM prediction
BTW08-1	Sand	1694.7	0.496454	1466.32	HM
BTW08-10	Sand	1958.8	0.273205	1546.31	HM
BTW08-100	Sand	215.2	0.0969019	471.349	LM
BTW08-101	Sand	2913.5	0.512035	1422.99	I+M
BTW08-102	Sand	2638.7	0.71913	1516.63	I+M
BTW08-103	Sand	3812	4.44048	1716.74	I+M
BTW08-104	Sand	2497.4	0.515815	1625.87	I+M
BTW08-106	Sand	2816.7	1.86765	1836.86	I+M
BTW08-107	Sand	905.8	4.65432	N/A	I+M
BTW08-108	Sand	798.6	1.24623	1710.88	LM
BTW08-109	Sand	3238.1	0.304307	1268.45	I+M
BTW08-11	Sand	604.4	0.664247	431.055	LM
BTW08-110	Sand	3012.7	0.756007	460.303	I+M
BTW08-111	Sand	7757	0.635628	1533.69	I+M
BTW08-112	Sand	2332.1	0.678571	1365.71	I+M
BTW08-113	Sand	3104.8	0.980684	1568.14	I+M
BTW08-115	Sand	200.52	0.363799	1477.58	LM
BTW08-12	Sand	5551	0.517866	1748.91	I+M
BTW08-13	Sand	230.29	1.01437	1572.95	LM
BTW08-14	Sand	2559.7	0.411765	1673.15	I+M
BTW08-15	Sand	10472	0.244643	1662.66	I+M
BTW08-16	Sand	4743	0.247687	1574.78	I+M
BTW08-17	Sand	4954	0.109849	1634.82	I+M
BTW08-18	Sand	185.61	19.2771	1102.39	LM
BTW08-19	Sand	979	0.987368	N/A	LM
BTW08-2	Sand	1882.6	1.73134	1775.37	I+M
BTW08-20	Sand	627	1.35581	1598.24	LM
BTW08-21	Sand	418.4	2.88408	520.456	LM
BTW08-22	Sand	4037	0.133266	1393.53	I+M
BTW08-23	Sand	1200.3	3.59551	1619.18	I+M
BTW08-24	Sand	1058.6	1.55844	421.962	I+M
BTW08-25	Sand	3292	1.16135	1696.21	I+M
BTW08-26	Sand	2234.3	0.0608921	1564.05	HM
BTW08-27	Sand	4921	0.226982	1665.86	I+M
BTW08-28	Sand	1577.7	1.2881	1477.07	I+M
BTW08-29	Sand	628.7	3.51293	1640.91	LM
BTW08-3	Sand	770.7	1.37215	1308.28	LM
BTW08-30	Sand	74.64	0.642317	2700.16	LM
BTW08-31	Sand	128.76	0.163416	469.673	LM
BTW08-32	Sand	1347	1.96215	2074.89	I+M
BTW08-33	Sand	4127	0.157332	1701.87	I+M
BTW08-34	Sand	3521.1	0.870229	1826.11	I+M
BTW08-35	Sand	616.4	1.24425	939.674	LM
BTW08-36	Sand	373.3	4.96727	1283.9	LM
BTW08-37	Sand	3691	0.0825372	1539.02	HM
BTW08-38	Sand	2277.9	0.73324	1581.49	I+M
BTW08-39	Sand	31.64	7.65237	1682.15	LM
BTW08-4	Sand	0.874	20.8768	0	LM
BTW08-42	Sand	6141	0.200567	1527.95	I+M
BTW08-43	Sand	318.5	0.51487	1586.38	LM
BTW08-44	Sand	7994	0.160948	1532.35	I+M
BTW08-45	Sand	3565	2.74487	1741.73	I+M
BTW08-46	Sand	973.8	1.02121	486.882	LM
BTW08-47	Sand	3891	0.338555	1257.27	I+M
BTW08-48	Sand	1579.8	1.37453	N/A	I+M
BTW08-49	Sand	730.3	0.858904	1517.19	LM
BTW08-5	Sand	1123.2	5.3125	1651.28	I+M
BTW08-50	Sand	1214.2	4.18627	1813.39	I+M
BTW08-52	Sand	1312.4	0.46069	1634.96	HM
BTW08-53	Sand	2585.3	1.13529	1517.71	I+M
BTW08-54	Sand	4866	1.68121	1771.45	I+M
BTW08-55	Sand	1530.1	1.59841	1663.19	I+M
BTW08-56	Sand	137.53	3.03514	1827.97	LM
BTW08-57	Sand	419.6	1.1	433.202	LM
BTW08-58	Sand	8081.3	0.148711	1590.85	I+M
BTW08-59	Sand	2646	4.41722	433.001	I+M
BTW08-60	Sand	9128	0.216717	426.627	I+M
BTW08-61	Sand	4728	0.239941	1532.1	I+M
BTW08-62	Sand	4133.3	0.326369	1425.83	I+M
BTW08-63	Sand	2700.5	0.155222	1681.93	HM
BTW08-64	Sand	1941.3	2.04399	1333.84	I+M
BTW08-65	Sand	4652	0.460793	1585.15	I+M
BTW08-66	Sand	4047	0.434211	1502.99	I+M
BTW08-67	Sand	3182.1	0.415811	1647.2	I+M
BTW08-68	Sand	301.3	2.54075	1286.76	LM
BTW08-69	Sand	3058.5	0.569353	1850.6	I+M
BTW08-7	Sand	1703.7	1.05244	1419.65	I+M
BTW08-70	Sand	922.3	7.07504	0	UM
BTW08-71	Sand	6174.5	0.262118	1587.45	I+M
BTW08-72	Sand	2016.5	0.452703	1666.1	I+M
BTW08-73	Sand	5269	0.189552	1528.48	I+M
BTW08-77	Sand	3279	0.36533	1696.76	I+M
BTW08-78	Sand	2632.2	0.539737	2462.04	I+M
BTW08-79	Sand	1523.4	2.65651	N/A	I+M
BTW08-8	Sand	454.7	1.48509	1537.78	LM
BTW08-80	Sand	2152.2	0.944359	1596.28	I+M
BTW08-81	Sand	1565.1	1.034	1319.49	I+M
BTW08-82	Sand	3139.3	0.498943	1698.95	I+M
BTW08-83	Sand	2058.9	0.66761	1596.78	I+M
BTW08-84	Sand	50.47	0.332051	493.624	LM
BTW08-85	Sand	4624	0.931857	1821.63	I+M
BTW08-87	Sand	1859.7	0.942857	1381.93	I+M
BTW08-88	Sand	58.5	0.192316	534.615	LM
BTW08-89	Sand	2631.2	0.630513	1446.44	I+M
BTW08-90	Sand	474.3	0.52381	1135.48	LM
BTW08-92	Sand	3385.6	0.35381	1133.4	I+M
BTW08-93	Sand	5313	0.457778	1580.88	I+M
BTW08-94	Sand	1648.2	1.80172	1707.18	I+M
BTW08-95	Sand	3319.9	0.628431	1682.54	I+M
BTW08-96	Sand	6040	0.181322	1564.25	I+M
BTW08-97	Sand	11311	0.0527387	1393.54	S
BTW08-98	Sand	1013.1	0.221419	1373.22	HM
BTW08-99	Sand	2096.8	1.0743	1294.44	I+M
Sample 5
Grain	Lithology	LREE	Sr/Y	Age	SVM prediction
BTW11-1	Sand	1198	0.2509	434.732	HM
BTW11-100	Sand	3391	0.8	1704.38	I+M
BTW11-101	Sand	3122	0.0689377	1548.8	HM
BTW11-102	Sand	42.25	0.184348	506.995	LM
BTW11-103	Sand	2566.8	0.856846	1626.55	I+M
BTW11-104	Sand	1368.9	0.402252	2288.94	HM
BTW11-105	Sand	4907	0.267337	1965.45	I+M
BTW11-106	Sand	310.15	10.7609	1158.09	LM
BTW11-107	Sand	2558.3	0.369014	1486.7	I+M
BTW11-109	Sand	1436	0.1662	1697.67	HM
BTW11-11	Sand	5213.4	0.468402	1903.19	I+M
BTW11-110	Sand	702.8	0.724454	503.551	LM
BTW11-111	Sand	7006	4.28894	379.725	I+M
BTW11-112	Sand	115.7	0.264935	N/A	LM
BTW11-113	Sand	5942	0.524609	N/A	I+M
BTW11-114	Sand	2182.9	1.9725	N/A	I+M
BTW11-115	Sand	4960.3	1.48969	N/A	I+M
BTW11-116	Sand	21.69	0.288523	N/A	LM
BTW11-118	Sand	8396	0.11491	N/A	I+M
BTW11-119	Sand	710.2	0.278657	N/A	HM
BTW11-12	Sand	3794	0.146256	1699.56	HM
BTW11-120	Sand	3181.9	0.373192	N/A	I+M
BTW11-121	Sand	1307.3	0.199562	N/A	HM
BTW11-122	Sand	513.7	0.314141	N/A	LM
BTW11-123	Sand	261.95	1.88511	N/A	LM
BTW11-13	Sand	4832.2	0.466667	1901.37	I+M
BTW11-14	Sand	321.35	0.107782	1629.27	LM
BTW11-15	Sand	1021.8	0.09732	425.779	HM
BTW11-16	Sand	4807	1.31746	1750.66	I+M
BTW11-17	Sand	2623.8	0.968111	1690.3	I+M
BTW11-19	Sand	4574.6	0.552721	2023.94	I+M
BTW11-2	Sand	755.9	2.98406	483.91	LM
BTW11-20	Sand	3547.8	0.332011	2752.28	I+M
BTW11-21	Sand	1763.3	0.984266	2281.59	I+M
BTW11-22	Sand	2610.8	0.261619	1762.98	HM
BTW11-23	Sand	3467	0.39805	1634.85	I+M
BTW11-24	Sand	2238.2	1.07368	968.089	I+M
BTW11-25	Sand	194.42	0.34009	651.703	LM
BTW11-26	Sand	4490	0.572398	391.411	I+M
BTW11-28	Sand	1112.4	0.455569	2110.67	HM
BTW11-29	Sand	2223.8	0.954469	1367.34	I+M
BTW11-3	Sand	500	0.395661	540.818	LM
BTW11-30	Sand	6179	0.125532	1639.06	I+M
BTW11-31	Sand	3540	1.55315	1752.6	I+M
BTW11-32	Sand	2761.1	0.23679	1754.26	HM
BTW11-33	Sand	3869	0.318615	1694.51	I+M
BTW11-34	Sand	5437	0.195957	1699.34	I+M
BTW11-35	Sand	126.78	0.116889	678.252	LM
BTW11-36	Sand	2358	0.477492	1907.06	I+M
BTW11-37	Sand	3826.8	0.299913	692.472	I+M
BTW11-38	Sand	484.5	1.48424	1809.95	LM
BTW11-39	Sand	1787.9	0.502877	1762.8	I+M
BTW11-4	Sand	5321	0.513127	1778.9	I+M
BTW11-40	Sand	1835.3	0.0706776	1823.99	HM
BTW11-41	Sand	2642	2.05533	1856.74	I+M
BTW11-42	Sand	6049	0.363338	1970.61	I+M
BTW11-43	Sand	3439.2	0.2552	2076.66	I+M
BTW11-44	Sand	221.95	0.0785775	893.367	LM
BTW11-45	Sand	1761.2	4.0233	1788.51	I+M
BTW11-46	Sand	59.78	7.62353	1861.9	LM
BTW11-47	Sand	376.4	0.051548	N/A	LM
BTW11-48	Sand	190.4	0.965217	429.479	LM
BTW11-49	Sand	789.2	0.124623	1724.53	HM
BTW11-5	Sand	8268	0.682353	2065.99	I+M
BTW11-50	Sand	66.57	3.5082	1685.71	LM
BTW11-51	Sand	2559.3	0.964706	1529.02	I+M
BTW11-52	Sand	1844.4	0.333149	607.029	HM
BTW11-53	Sand	4899	0.592217	1867.91	I+M
BTW11-54	Sand	151.76	0.217391	728.251	LM
BTW11-55	Sand	182.94	1.16116	480.014	LM
BTW11-56	Sand	3092.5	0.408997	1794.61	I+M
BTW11-57	Sand	1624.3	0.10971	1605.34	HM
BTW11-58	Sand	341.9	0.273973	516.26	LM
BTW11-59	Sand	4560	1.58175	1899.21	I+M
BTW11-6	Sand	138.56	0.0694109	459.353	LM
BTW11-61	Sand	204.69	0.42681	437.965	LM
BTW11-62	Sand	1394	0.482	1744.36	HM
BTW11-63	Sand	3072	2.21382	1883.69	I+M
BTW11-64	Sand	344.7	0.399938	657.611	LM
BTW11-65	Sand	1741	0.281728	1551.5	HM
BTW11-66	Sand	3403.9	0.250504	1783.4	I+M
BTW11-67	Sand	399.4	0.387147	444.475	LM
BTW11-68	Sand	892.4	0.190175	1806.12	HM
BTW11-69	Sand	2177.5	0.106856	981.035	HM
BTW11-7	Sand	1269.6	0.296171	479.965	HM
BTW11-70	Sand	197	0.240046	1850.05	LM
BTW11-71	Sand	6866	0.235347	1862.44	I+M
BTW11-72	Sand	5856	22.8287	443.378	UM
BTW11-73	Sand	225.98	1.29129	1775.68	LM
BTW11-74	Sand	3484	0.518664	1790.56	I+M
BTW11-75	Sand	1841.3	0.609677	1661.03	I+M
BTW11-76	Sand	134.85	5.84719	1614.96	LM
BTW11-77	Sand	1667.8	1.85663	1505.01	I+M
BTW11-78	Sand	8694	0.0599	1579.58	S
BTW11-79	Sand	5452	0.132093	522.586	I+M
BTW11-8	Sand	4376.7	2.95618	2011.9	I+M
BTW11-80	Sand	86.47	0.400972	438.259	LM
BTW11-81	Sand	1045.1	0.244482	1734.14	HM
BTW11-82	Sand	1195.2	0.797552	1575.61	I+M
BTW11-83	Sand	1268.6	0.504121	1835.01	HM
BTW11-84	Sand	3351.1	1.34451	445.773	I+M
BTW11-85	Sand	261.2	0.813472	469.733	LM
BTW11-86	Sand	337.7	0.105713	1924.27	LM
BTW11-87	Sand	6898	0.526718	1777.5	I+M
BTW11-88	Sand	6868	0.211679	1826.18	I+M
BTW11-89	Sand	2488.3	1.04382	1323.45	I+M
BTW11-9	Sand	5371	0.169245	1854.61	I+M
BTW11-90	Sand	854	0.258299	445.711	HM
BTW11-91	Sand	611.2	0.218144	1763.44	LM
BTW11-92	Sand	5052	0.192264	432.8	I+M
BTW11-93	Sand	6134.9	3.9932	N/A	I+M
[truncated: 5 more rows]

## Sheet: Petrography
Table 6. Petrographic analysis, Mullaghmore Sandstone fm
[truncated: 36 more rows]
